# Supplementary material for: Practical Considerations for using Social Determinants of Health for Disease Prediction in All of Us
Source: Research Square preprint supplement (doi:10.21203/rs.3.rs-8428004/v1), 2026-01-13
Supplement: Supplementary file 1 [file 2f3a697bf42a3d04dcdefb75.pdf]

Supplementary Table 2 (S4): Case control demographics in SES Cohort

| Disease   | Status  | Sample size | Age (sd)   | Cisgender Ma  | Cisgender Fem |
|-----------|---------|-------------|------------|---------------|---------------|
| Asthma    | Case    | 12314       | 54 (16.07) | 3090 (25.1%)  | 8924 (72.5%)  |
| Asthma    | Control | 38679       | 56 (17.16) | 15496 (40.1%) | 22159 (57.3%) |
| Afib      | Case    | 8220        | 72 (11.92) | 4692 (57.1%)  | 3300 (40.1%)  |
| Afib      | Control | 17693       | 63 (15.03) | 6435 (36.4%)  | 10847 (61.3%) |
| BreastC   | Case    | 5325        | 68 (11.53) | 0 (0%)        | 5221 (98%)    |
| BreastC   | Control | 73041       | 56 (16.42) | 0 (0%)        | 70145 (96%)   |
| CKD       | Case    | 9260        | 72 (12.16) | 4366 (47.1%)  | 4850 (52.4%)  |
| CKD       | Control | 31087       | 48 (15.26) | 10468 (33.7%) | 20619 (66.3%) |
| CHD       | Case    | 14868       | 71 (11.14) | 8788 (59.1%)  | 5719 (38.5%)  |
| CHD       | Control | 105837      | 57 (16.45) | 36051 (34.1%) | 67248 (63.5%) |
| HyperC    | Case    | 26709       | 68 (12.02) | 11560 (43.3%) | 14602 (54.7%) |
| HyperC    | Control | 11018       | 46 (15.16) | 3388 (30.7%)  | 7368 (66.9%)  |
| ProstateC | Case    | 3585        | 74 (8.16)  | 3494 (97.5%)  | 0 (0%)        |
| ProstateC | Control | 6230        | 72 (11.14) | 6053 (97.2%)  | 0 (0%)        |
| t2d       | Case    | 21209       | 65 (12.57) | 9353 (44.1%)  | 11320 (53.4%) |
| t2d       | Control | 42092       | 55 (16.78) | 14356 (34.1%) | 26791 (63.6%) |
| t1d       | Case    | 1289        | 58 (16.24) | 570 (44.2%)   | 695 (53.9%)   |
| t1d       | Control | 42092       | 55 (16.78) | 14356 (34.1%) | 26791 (63.6%) |

| Non-Cisgend | Asian       | Black         | Middle Eastern or North Afri | Multiple    |
|-------------|-------------|---------------|------------------------------|-------------|
| 300 (2.4%)  | 162 (1.3%)  | 2313 (18.8%)  | 34 (0.3%)                    | 271 (2.2%)  |
| 1024 (2.6%) | 1019 (2.6%) | 7230 (18.7%)  | 195 (0.5%)                   | 641 (1.7%)  |
| 228 (2.8%)  | 61 (0.7%)   | 809 (9.8%)    | 24 (0.3%)                    | 68 (0.8%)   |
| 411 (2.3%)  | 237 (1.3%)  | 3553 (20.1%)  | 52 (0.3%)                    | 245 (1.4%)  |
| 104 (2%)    | 80 (1.5%)   | 631 (11.8%)   | <20                          | 52 (1%)     |
| 2896 (4%)   | 1380 (1.9%) | 13612 (18.6%) | 254 (0.3%)                   | 1299 (1.8%) |
| 44 (0.5%)   | 77 (0.8%)   | 2202 (23.8%)  | 26 (0.3%)                    | 89 (1%)     |
| 0 (0%)      | 945 (3%)    | 4075 (13.1%)  | 188 (0.6%)                   | 645 (2.1%)  |
| 361 (2.4%)  | 157 (1.1%)  | 2262 (15.2%)  | 47 (0.3%)                    | 159 (1.1%)  |
| 2538 (2.4%) | 2245 (2.1%) | 17949 (17%)   | 475 (0.4%)                   | 1743 (1.6%) |
| 547 (2%)    | 367 (1.4%)  | 3785 (14.2%)  | 102 (0.4%)                   | 309 (1.2%)  |
| 262 (2.4%)  | 374 (3.4%)  | 1777 (16.1%)  | 76 (0.7%)                    | 251 (2.3%)  |
| 91 (2.5%)   | 23 (0.6%)   | 415 (11.6%)   | 21 (0.6%)                    | 28 (0.8%)   |
| 177 (2.8%)  | 60 (1%)     | 554 (8.9%)    | <20                          | 71 (1.1%)   |
| 536 (2.5%)  | 343 (1.6%)  | 5199 (24.5%)  | 81 (0.4%)                    | 281 (1.3%)  |
| 945 (2.2%)  | 834 (2%)    | 4619 (11%)    | 209 (0.5%)                   | 705 (1.7%)  |
| 24 (1.9%)   | <20         | 235 (18.2%)   | <20                          | 21 (1.6%)   |
| 945 (2.2%)  | 834 (2%)    | 4619 (11%)    | 209 (0.5%)                   | 705 (1.7%)  |

| Native Hawaiian or Other Pacific Isl | White         | Hispanic      | Median Record De | Disability    |
|--------------------------------------|---------------|---------------|------------------|---------------|
| <20                                  | 7822 (63.5%)  | 1686 (13.7%)  | 141              | 2608 (21.2%)  |
| 20 (0.1%)                            | 24408 (63.1%) | 5030 (13%)    | 58               | 6034 (15.6%)  |
| <20                                  | 6643 (80.8%)  | 430 (5.2%)    | 189              | 2286 (27.8%)  |
| <20                                  | 11151 (63%)   | 2239 (12.7%)  | 181              | 3751 (21.2%)  |
| 0 (0%)                               | 4008 (75.3%)  | 444 (8.3%)    | 171              | 988 (18.6%)   |
| 29 (0%)                              | 46693 (63.9%) | 9376 (12.8%)  | 95               | 12713 (17.4%) |
| <20                                  | 5889 (63.6%)  | 773 (8.3%)    | 201              | 2583 (27.9%)  |
| <20                                  | 20558 (66.1%) | 4829 (15.5%)  | 81               | 4780 (15.4%)  |
| <20                                  | 10633 (71.5%) | 1261 (8.5%)   | 200              | 4107 (27.6%)  |
| 43 (0%)                              | 70293 (66.4%) | 12560 (11.9%) | 88               | 18235 (17.2%) |
| <20                                  | 19206 (71.9%) | 2446 (9.2%)   | 180              | 5655 (21.2%)  |
| <20                                  | 7334 (66.6%)  | 1216 (11%)    | 86               | 1459 (13.2%)  |
| 0 (0%)                               | 2829 (78.9%)  | 177 (4.9%)    | 181              | 817 (22.8%)   |
| <20                                  | 4968 (79.7%)  | 405 (6.5%)    | 235              | 2517 (40.4%)  |
| <20                                  | 12080 (57%)   | 2900 (13.7%)  | 165              | 6040 (28.5%)  |
| <20                                  | 31373 (74.5%) | 4194 (10%)    | 95               | 6336 (15.1%)  |
| <20                                  | 872 (67.6%)   | 139 (10.8%)   | 152              | 359 (27.9%)   |
| <20                                  | 31373 (74.5%) | 4194 (10%)    | 95               | 6336 (15.1%)  |

LGBTQIA    Income <50k   Income >150k   Advanced Degr   Less than HighSchool

1626 (13.2%) 5935 (48.2%) 1711 (13.9%) 3097 (25.2%) 691 (5.6%)  
4351 (11.2%) 17965 (46.4%) 5914 (15.3%) 10335 (26.7%) 2521 (6.5%)  
677 (8.2%) 3409 (41.5%) 1189 (14.5%) 2499 (30.4%) 308 (3.7%)  
1739 (9.8%) 8605 (48.6%) 2343 (13.2%) 4461 (25.2%) 1277 (7.2%)  
337 (6.3%) 1945 (36.5%) 996 (18.7%) 1766 (33.2%) 168 (3.2%)  
8876 (12.2%) 35490 (48.6%) 9833 (13.5%) 18590 (25.5%) 4320 (5.9%)  
567 (6.1%) 5082 (54.9%) 815 (8.8%) 2091 (22.6%) 566 (6.1%)  
3169 (10.2%) 13294 (42.8%) 5356 (17.2%) 8516 (27.4%) 1653 (5.3%)  
1256 (8.4%) 7261 (48.8%) 1863 (12.5%) 3742 (25.2%) 948 (6.4%)  
11671 (11%) 46948 (44.4%) 16799 (15.9%) 29049 (27.4%) 5722 (5.4%)  
2172 (8.1%) 11244 (42.1%) 4169 (15.6%) 7885 (29.5%) 1293 (4.8%)  
1431 (13%) 4303 (39.1%) 2172 (19.7%) 3553 (32.2%) 407 (3.7%)  
282 (7.9%) 1039 (29%) 788 (22%) 1392 (38.8%) 99 (2.8%)  
506 (8.1%) 2435 (39.1%) 669 (10.7%) 1550 (24.9%) 86 (1.4%)  
2065 (9.7%) 12205 (57.5%) 1617 (7.6%) 3855 (18.2%) 1763 (8.3%)  
4711 (11.2%) 15586 (37%) 8263 (19.6%) 13626 (32.4%) 1430 (3.4%)  
143 (11.1%) 632 (49%) 149 (11.6%) 271 (21%) 49 (3.8%)  
4711 (11.2%) 15586 (37%) 8263 (19.6%) 13626 (32.4%) 1430 (3.4%)
