# Supplementary material for: Practical Considerations for using Social Determinants of Health for Disease Prediction in All of Us
Source: Research Square preprint supplement (doi:10.21203/rs.3.rs-8428004/v1), 2026-01-13
Supplement: Supplementary file 2 [file 923dd52aea7fe059dd6f85fd.pdf]

Supplementary Table 5 (S1): PsRS EN summary results in Individual cohort. Reported value

| model      | Disease   | mean_train_ | sd_train_sco | mean_test_s | sd_test_scor | mean_AUC  |
|------------|-----------|-------------|--------------|-------------|--------------|-----------|
| Individual | Asthma    | 1.1360657   | 0.0042364    | 0.201768    | 0.0063944    | 0.6298327 |
| Individual | Afib      | 1.2674272   | 0.0016018    | 0.1743056   | 0.0090871    | 0.6005107 |
| Individual | BreastC   | 0.5471684   | 0.0054114    | 0.1356357   | 0.0023041    | 0.6328753 |
| Individual | CKD       | 0.951348    | 0.0036148    | 0.3071802   | 0.0092165    | 0.7181815 |
| Individual | CHD       | 0.700445    | 0.0022503    | 0.1825933   | 0.0056034    | 0.6597972 |
| Individual | HyperC    | 1.0734731   | 0.0048871    | 0.30748     | 0.0052493    | 0.699084  |
| Individual | ProstateC | 1.2072546   | 0.0040928    | 0.2652801   | 0.0143157    | 0.6644376 |
| Individual | t2d       | 1.1148175   | 0.0078408    | 0.3320073   | 0.0085203    | 0.7042444 |
| Individual | t1d       | 0.2928233   | 0.0045744    | 0.1280782   | 0.0058415    | 0.6798188 |
| Area       | Asthma    | 1.1581115   | 0.0047516    | 0.1390941   | 0.0136068    | 0.5935948 |
| Area       | Afib      | 1.2746893   | 0.0018343    | 0.1410349   | 0.0048286    | 0.5779705 |
| Area       | BreastC   | 0.5642045   | 0.0055257    | 0.0520877   | 0.0064243    | 0.5       |
| Area       | CKD       | 1.050083    | 0.0013944    | 0.0736517   | 0.0086753    | 0.5       |
| Area       | CHD       | 0.7327898   | 0.0030595    | 0.0550988   | 0.0098978    | 0.5       |
| Area       | HyperC    | 1.1721911   | 0.0049542    | 0.0750809   | 0.0104964    | 0.5       |
| Area       | ProstateC | 1.1921684   | 0.0053999    | 0.3038531   | 0.0121128    | 0.6934451 |
| Area       | t2d       | 1.2121502   | 0.0057784    | 0.1207215   | 0.0065405    | 0.5704198 |
| Area       | t1d       | 0.3065623   | 0.0047177    | 0.0351864   | 0.0041797    | 0.5       |
| Combined   | Asthma    | 1.1141078   | 0.0048911    | 0.243552    | 0.0058169    | 0.661553  |
| Combined   | Afib      | 1.2510944   | 0.0015617    | 0.2158433   | 0.0047068    | 0.6279957 |
| Combined   | BreastC   | 0.5457549   | 0.0053068    | 0.1402991   | 0.0021841    | 0.6359537 |
| Combined   | CKD       | 0.9485182   | 0.0033967    | 0.3112112   | 0.0085559    | 0.7204422 |
| Combined   | CHD       | 0.6990989   | 0.0024348    | 0.1878485   | 0.0047893    | 0.6615586 |
| Combined   | HyperC    | 1.0721876   | 5.06E-03     | 0.3100144   | 0.0047216    | 0.699873  |
| Combined   | ProstateC | 1.1235992   | 0.0070856    | 0.3841622   | 0.017194     | 0.7377813 |
| Combined   | t2d       | 1.1075521   | 0.0080761    | 0.3411419   | 0.0086443    | 0.7097825 |
| Combined   | t1d       | 0.2925833   | 0.0046986    | 0.1291261   | 0.0064515    | 0.6799816 |

s include the mean and standard deviation of training scores (mean\_train\_score

| sd_AUC    | n_predictors | Predictors   | mean_coef     | sd_coef       | coef_nonzero   | Intercept  |
|-----------|--------------|--------------|---------------|---------------|----------------|------------|
| 0.0016021 | 24           | Education,Sc | 0.199606,0.0  | 0.050316,0.0  | (5,1,5,3,5,5,5 | -2.8756659 |
| 0.0047474 | 24           | Education,Sc | -0.022006,-0  | 0.021209,0.0  | (3,5,3,3,5,5,5 | -0.2970221 |
| 0.00825   | 24           | Education,Sc | -0.01669,-0.4 | 0.018321,0.13 | 5,2,4,5,5,5    | -3.2340016 |
| 0.0017704 | 24           | Education,Sc | 0.207869,-1   | 0.048282,0.0  | (5,5,5,5,5,5,5 | -0.8466934 |
| 0.0014382 | 24           | Education,Sc | 0.414406,-0   | 0.034645,0.0  | (5,5,4,3,5,5,5 | -1.9177951 |
| 0.0010175 | 24           | Education,Sc | 0.729076,-1   | 0.03451,0.07  | 5,5,4,2,5,5,5  | 0.9744081  |
| 0.0044312 | 24           | Education,Sc | -0.6384,-0.1  | 0.076575,0.0  | (5,5,5,4,5,5,3 | -0.0744746 |
| 0.0031998 | 24           | Education,Sc | 0.993743,-0   | 0.043732,0.0  | (5,5,5,5,5,5,5 | -1.1675453 |
| 0.0059494 | 21           | Education,Sc | 0.713133,-0   | 0.067618,0.0  | (5,5,4,5,5,5,2 | -4.73415   |
| 0.0046848 | 6            | assisted_inc | 3.088745,-1   | 0.200738,0.15 | 5,5,5,5,5,5    | -0.6039604 |
| 0.0032178 | 6            | assisted_inc | 0.029514,0.4  | 0.181241,0.0  | (3,5,5,5,5,5   | -0.6896314 |
| 0         | 6            | assisted_inc | 0.171483,0.1  | 0.227859,0.13 | 4,5,2,4,5      | -1.8046889 |
| 0         | 6            | assisted_inc | -1.068205,0   | 0.146227,0.15 | 5,5,5,4,5      | -1.3243312 |
| 0         | 6            | assisted_inc | -0.476185,0   | 0.159111,0.15 | 5,5,5,5,5,5    | -1.5915427 |
| 0         | 6            | assisted_inc | 0.006605,0.0  | 0.157066,0.0  | (5,2,5,5,5,5   | 0.9554069  |
| 0.0029219 | 6            | assisted_inc | 9.287145,-3   | 0.280907,0.3  | 5,5,5,5,5,5    | 0.1578117  |
| 0.0019402 | 7            | assisted_inc | -2.000112,2   | 0.12378,0.14  | 5,5,5,3,5,5,1  | -1.2051196 |
| 0         | 5            | assisted_inc | -0.209922,1   | 0.469399,0.3  | 1,5,1,1,5      | -3.6161382 |
| 0.0028769 | 30           | Education,Sc | 0.28158,0.0   | 0.051437,0.0  | (5,1,5,4,5,5,5 | -2.4334759 |
| 0.0020064 | 30           | Education,Sc | -0.049691,-0  | 0.039966,0.0  | (5,5,3,4,5,5,5 | -0.5271973 |
| 0.0065679 | 27           | Education,Sc | -0.009143,-0  | 0.013347,0.13 | 5,4,4,5,5,5    | -2.8651986 |
| 0.0012586 | 30           | Education,Sc | 0.211346,-1   | 0.048363,0.0  | (5,5,5,5,5,5,5 | -0.5598496 |
| 0.0014993 | 30           | Education,Sc | 0.42164,-0.9  | 0.036963,0.0  | (5,5,4,1,5,5,5 | -1.4857183 |
| 8.79E-04  | 30           | Education,Sc | 0.723203,-1   | 0.036404,0.0  | (5,5,4,2,5,5,5 | 0.9806142  |
| 0.0034485 | 30           | Education,Sc | -0.692245,-0  | 0.098745,0.0  | (5,5,5,5,5,5,4 | 0.3548259  |
| 0.003126  | 30           | Education,Sc | 0.9751,-0.68  | 0.046885,0.0  | (5,5,5,5,5,5,5 | -0.9240977 |
| 0.0061023 | 29           | Education,Sc | 0.70023,-0.2  | 0.06297,0.0   | 5,5,4,2,5,5,4  | -4.7822362 |

full\_data\_coef

-2.875666,0.202876,0,-0.178912,0,0.263275,0.918742,0.131016,0.149439,-0.078735,0.178  
-0.297022,0,-0.533025,-0.111171,0.031144,-0.71092,-0.779867,0.248926,-0.442647,0,0.37  
-3.234002,-0.017194,-0.496571,0,0.186945,-0.918767,-0.491059,0.353306,0,0,-0.099688,0  
-0.846693,0.242251,-1.010422,0.777465,0.083719,-1.4362,-2.093074,0.609996,0.560603,-  
-1.917795,0.412826,-0.923988,0.075612,-0.023309,-1.181051,-1.079565,0.191172,0,0,0.00  
0.974408,0.709418,-1.377296,0.076067,-0.046753,-1.142206,-1.486949,0.578545,0.37230  
-0.074475,-0.653117,-0.134172,-0.791174,-0.210723,-1.359371,-0.370033,0.049645,0.0712  
-1.167545,0.983551,-0.718145,0.129883,-0.348309,-0.335751,-0.96739,0.808824,0.39477,  
-4.73415,0.675611,-0.315774,0,-0.132206,0,-0.229788,0.465881,0.354427,0,0,-0.161963,-0  
-0.60396,3.028698,-1.168441,-0.672911,-2.010239,-0.947985,0.564906,0  
-0.689631,0,0.41959,-0.072663,1.763673,-2.438551,1.393437,0  
-1.804689,0,0,-1.290281,0,-0.038769,1.042296,0  
-1.324331,-1.152568,0.750468,-0.133463,0.716434,-0.185503,1.201108,0  
-1.591543,-0.385008,0.620182,-0.824127,0.270715,-0.485114,0.708289,0  
0.955407,0,0.069793,0.212403,0.593661,-1.90766,1.109642,0  
0.157812,9.405108,-3.173739,-3.589962,-0.466724,-3.598115,3.754166,0  
-1.20512,-1.954245,2.672112,0.224161,-0.01237,0.303764,0.943495,0  
-3.616138,0,1.165557,0,0,0,0.381481,0  
-2.433476,0.272162,0,-0.206304,0.015408,0.296419,0.899203,0.214973,0.296892,-0.0996  
-0.527197,-0.017409,-0.499659,-0.074603,0.081033,-0.664145,-0.773754,0.117698,-0.4664  
-2.865199,-0.002869,-0.48213,0.045113,0.214774,-0.883676,-0.516813,0.37626,0.017691,  
-0.55985,0.245482,-0.990406,0.802787,0.099786,-1.406385,-2.082617,0.585368,0.46038,-  
-1.485718,0.415307,-0.900774,0.08182,0,-1.12132,-1.060119,0.204052,0,0,0.016771,-0.28  
0.980614,0.701667,-1.378713,0.079577,-0.038092,-1.133398,-1.48468,0.56096,0.428992,-  
0.354826,-0.702848,-0.080506,-0.64369,-0.091623,-1.298687,-0.414178,0.10441,0.081952  
-0.924098,0.963556,-0.703704,0.18629,-0.335309,-0.326192,-0.982642,0.790915,0.291871  
-4.782236,0.664838,-0.33256,0,-0.131409,-0.012522,-0.29,0.452696,0.279702,0,0,-0.24543

3569,-0.125936,-0.038518,-0.076552,-0.059779,0.14995,0.258575,0.25534,0.42771,0.20961  
4884,-0.125762,0.147999,-0.062845,-0.050076,-0.188461,0,-0.223667,0.13339,0.066704,1.  
,0.430125,-0.007407,-0.075044,-0.021237,0.520439,-0.0806,0,0.214059,1.862756,-0.37591  
0.090307,-0.198972,-0.540156,0.150853,-0.024049,-0.30704,0.106069,-1.206819,-0.44008  
0888,-0.228801,0.146239,0,-0.079215,0.068722,-0.11214,-0.332752,0.231578,0.250454,2.5  
3,-0.213789,0,-0.414941,0.430884,0,-0.31002,0.231338,0,-0.285365,0.26534,0.239412,2.6  
253,0,-0.069365,-0.349135,0.093603,-0.155799,-0.286946,-0.058412,2.043616,-0.033198,0  
-0.350141,0.135227,-0.248723,-0.004785,-0.001542,-0.097736,0.311638,-1.583099,-0.270  
0.023778,0.134116,0,0.279482,-1.149838,-0.11607,0,0,2.69341,0,0.2255,0,0.866302

23,0.209206,-0.121235,-0.025841,-0.035643,-0.064949,0.166106,0.235722,0.254616,0.470  
427,0,0.423255,0,0.123932,-0.071587,-0.066629,-0.215216,-0.009538,-0.212946,0.098307,  
0,-0.084498,0,0.454662,-0.00966,-0.074832,-0.034877,0.420821,-0.07984,0,0.226238,1.82  
0.087936,-0.192511,-0.611054,0.16893,-0.01886,-0.305471,0.092585,-1.289616,-0.426892,  
1167,0.162249,0,-0.073006,0.05451,-0.222,-0.319943,0.211355,0.255724,2.464068,-0.316  
0.176233,0,-0.319357,0.421521,0,-0.308116,0.223752,-0.004973,-0.282665,0.256048,0.24  
,0,-0.24767,-0.225245,0.257108,-0.100697,-0.281497,0,1.805692,-0.055702,-0.043943,0.08  
1,-0.391897,0.101765,-0.367713,0.019829,-0.006359,-0.10402,0.301035,-1.66806,-0.25065,  
38,-0.014607,0.161826,0,0.279065,-1.200827,-0.117956,0.074067,0,2.745224,-0.020341,0.1

194,0.17144,2.165203,0.060947,0.262931,0.054887,0.340317,3.184254,-1.664387,-0.8948  
0.106534,1.24999,-0.187298,0.195537,-0.305841,-0.014119,0,0.491147,0,1.665358,-2.0915  
3424,-0.375259,0,-0.045378,0.15274,0.160318,0.111869,-1.103514,0.037511,0,0.945492,0  
,0.483308,0.439372,2.216924,-0.503591,0.250262,-0.556754,0.49081,-0.229617,0.071976,-  
735,0.155977,-0.492415,0.296315,0,0.263736,-1.070528,0.373299,0.032163,0.42104,0  
237,2.662982,-0.509839,0.247656,-0.336232,0.56525,0,-0.062367,-0.030746,0.318186,-1.0  
34249,0.398657,-0.283198,0.387435,0.070615,-0.466293,8.754757,-2.023601,-3.280854,-0.  
,0.234184,0.154693,2.295994,-0.155398,0.188816,-0.228552,0.640256,-1.365752,1.633125

-1.063241,0.925143,0.534703,0.693787,0

i,-0.939596,0.216614,1.295125,0.524833,0

Supplementary Table 5 (S2): Logistic regression summary results

| Model      | Disease                | AUC       | AUC_CI_Low | AUC_CI_Upper |
|------------|------------------------|-----------|------------|--------------|
| Base       | Asthma                 | 0.7043092 | 0.6960159  | 0.7126026    |
| SIRE       | Asthma                 | 0.7040388 | 0.6957453  | 0.7123323    |
| SES        | Asthma                 | 0.705069  | 0.6967786  | 0.7133594    |
| Individual | Asthma                 | 0.7146287 | 0.70656    | 0.7226973    |
| Area       | Asthma                 | 0.7065746 | 0.6983696  | 0.7147796    |
| Combined   | Asthma                 | 0.7222295 | 0.7142724  | 0.7301867    |
| Base       | Atrial Fibrillation    | 0.7046652 | 0.6946711  | 0.7146592    |
| SIRE       | Atrial Fibrillation    | 0.7062544 | 0.6962748  | 0.7162339    |
| SES        | Atrial Fibrillation    | 0.7054724 | 0.6954874  | 0.7154574    |
| Individual | Atrial Fibrillation    | 0.7062201 | 0.6962333  | 0.7162069    |
| Area       | Atrial Fibrillation    | 0.7161042 | 0.7063     | 0.7259083    |
| Combined   | Atrial Fibrillation    | 0.7132148 | 0.7033231  | 0.7231065    |
| Base       | Breast Cancer          | 0.7136544 | 0.7047529  | 0.7225559    |
| SIRE       | Breast Cancer          | 0.7148903 | 0.7059921  | 0.7237885    |
| SES        | Breast Cancer          | 0.7175904 | 0.7087337  | 0.726447     |
| Individual | Breast Cancer          | 0.7205704 | 0.7118215  | 0.7293193    |
| Area       | Breast Cancer          | 0.7155766 | 0.7067392  | 0.7244141    |
| Combined   | Breast Cancer          | 0.721803  | 0.7130871  | 0.7305189    |
| Base       | Chronic Kidney Disease | 0.8638855 | 0.8576309  | 0.8701402    |
| SIRE       | Chronic Kidney Disease | 0.8770502 | 0.871101   | 0.8829995    |
| SES        | Chronic Kidney Disease | 0.8723753 | 8.66E-01   | 0.8783838    |
| Individual | Chronic Kidney Disease | 0.8662679 | 0.8600705  | 0.8724653    |
| Area       | Chronic Kidney Disease | 0.8662052 | 0.8600356  | 0.8723747    |
| Combined   | Chronic Kidney Disease | 0.866747  | 0.8605679  | 0.8729261    |
| Base       | Coronary Heart Disease | 0.7999508 | 0.7945651  | 0.8053365    |
| SIRE       | Coronary Heart Disease | 0.8001358 | 0.7947599  | 0.8055116    |
| SES        | Coronary Heart Disease | 0.8036813 | 0.7983884  | 0.8089742    |
| Individual | Coronary Heart Disease | 0.8008117 | 0.7954337  | 0.8061897    |
| Area       | Coronary Heart Disease | 0.7999726 | 0.7945873  | 0.8053578    |
| Combined   | Coronary Heart Disease | 0.8007473 | 0.7953691  | 0.8061256    |
| Base       | Hypercholesterolemia   | 0.8305252 | 0.8232508  | 0.8377996    |
| SIRE       | Hypercholesterolemia   | 0.8313223 | 0.8240611  | 0.8385835    |
| SES        | Hypercholesterolemia   | 0.8341411 | 0.8269039  | 0.8413783    |
| Individual | Hypercholesterolemia   | 0.8314138 | 0.8241599  | 0.8386676    |
| Area       | Hypercholesterolemia   | 0.8322847 | 0.8250538  | 0.8395156    |
| Combined   | Hypercholesterolemia   | 0.8317432 | 0.8244995  | 0.838987     |
| Base       | Prostate Cancer        | 0.6383231 | 0.6233305  | 0.6533157    |
| SIRE       | Prostate Cancer        | 0.6472552 | 0.63233    | 0.6621804    |
| SES        | Prostate Cancer        | 0.6970582 | 0.682558   | 0.7115583    |
| Individual | Prostate Cancer        | 0.7067397 | 0.6924189  | 0.7210604    |
| Area       | Prostate Cancer        | 0.7458262 | 0.7322843  | 0.7593682    |
| Combined   | Prostate Cancer        | 0.7677461 | 0.7546469  | 0.7808454    |

|            |             |           |           |           |
|------------|-------------|-----------|-----------|-----------|
| Base       | Type 2 Diab | 0.7100627 | 0.703555  | 0.7165704 |
| SIRE       | Type 2 Diab | 0.7485824 | 0.7423537 | 0.754811  |
| SES        | Type 2 Diab | 0.7672262 | 0.7613228 | 0.7731296 |
| Individual | Type 2 Diab | 0.7704882 | 0.7646213 | 0.7763551 |
| Area       | Type 2 Diab | 0.723405  | 0.717042  | 0.729768  |
| Combined   | Type 2 Diab | 0.7728424 | 0.7670047 | 0.7786801 |
| Base       | Type 1 Diab | 0.6458432 | 0.623037  | 0.6686493 |
| SIRE       | Type 1 Diab | 0.6776553 | 0.6554897 | 0.6998209 |
| SES        | Type 1 Diab | 0.7049454 | 0.6841881 | 0.7257028 |
| Individual | Type 1 Diab | 0.7350468 | 0.7158322 | 0.7542614 |
| Area       | Type 1 Diab | 0.6594799 | 0.6373615 | 0.6815983 |
| Combined   | Type 1 Diab | 0.7366608 | 0.7174323 | 0.7558893 |



Supplementary Table 5 (S3): AUC pair-wise comparisons in Individual cohort

| Disease | Model1     | Model2     | AUC1      | AUC2      | p_value   | bonf_p   |
|---------|------------|------------|-----------|-----------|-----------|----------|
| Afib    | Base       | SIRE       | 0.7046652 | 0.7062544 | 1.66E-02  | 3.70E-04 |
| Afib    | Base       | SES        | 0.7046652 | 0.7054724 | 1.38E-01  | 3.70E-04 |
| Afib    | Base       | Individual | 0.7046652 | 0.7062201 | 2.56E-02  | 3.70E-04 |
| Afib    | Base       | Area       | 0.7046652 | 0.7161042 | 7.39E-12  | 3.70E-04 |
| Afib    | Base       | Combined   | 0.7046652 | 0.7132148 | 1.86E-08  | 3.70E-04 |
| Afib    | SIRE       | SES        | 0.7062544 | 0.7054724 | 4.07E-01  | 3.70E-04 |
| Afib    | SIRE       | Individual | 7.06E-01  | 0.7062201 | 9.70E-01  | 3.70E-04 |
| Afib    | SIRE       | Area       | 0.7062544 | 0.7161042 | 8.21E-08  | 3.70E-04 |
| Afib    | SIRE       | Combined   | 0.7062544 | 0.7132148 | 2.33E-05  | 3.70E-04 |
| Afib    | SES        | Individual | 0.7054724 | 0.7062201 | 0.4132669 | 3.70E-04 |
| Afib    | SES        | Area       | 0.7054724 | 0.7161042 | 9.16E-10  | 3.70E-04 |
| Afib    | SES        | Combined   | 0.7054724 | 0.7132148 | 2.46E-06  | 3.70E-04 |
| Afib    | Individual | Area       | 0.7062201 | 0.7161042 | 1.61E-08  | 3.70E-04 |
| Afib    | Individual | Combined   | 0.7062201 | 0.7132148 | 7.13E-11  | 3.70E-04 |
| Afib    | Area       | Combined   | 0.7161042 | 0.7132148 | 2.73E-02  | 3.70E-04 |
| Asthma  | Base       | SIRE       | 0.7043092 | 0.7040388 | 5.28E-01  | 3.70E-04 |
| Asthma  | Base       | SES        | 0.7043092 | 0.705069  | 0.1137587 | 3.70E-04 |
| Asthma  | Base       | Individual | 0.7043092 | 0.7146287 | 1.88E-05  | 3.70E-04 |
| Asthma  | Base       | Area       | 0.7043092 | 0.7065746 | 2.57E-01  | 3.70E-04 |
| Asthma  | Base       | Combined   | 0.7043092 | 0.7222295 | 1.78E-10  | 3.70E-04 |
| Asthma  | SIRE       | SES        | 7.04E-01  | 0.705069  | 1.11E-01  | 3.70E-04 |
| Asthma  | SIRE       | Individual | 0.7040388 | 0.7146287 | 1.19E-05  | 3.70E-04 |
| Asthma  | SIRE       | Area       | 0.7040388 | 0.7065746 | 2.03E-01  | 3.70E-04 |
| Asthma  | SIRE       | Combined   | 0.7040388 | 0.7222295 | 7.08E-11  | 3.70E-04 |
| Asthma  | SES        | Individual | 0.705069  | 0.7146287 | 5.28E-05  | 3.70E-04 |
| Asthma  | SES        | Area       | 0.705069  | 0.7065746 | 4.69E-01  | 3.70E-04 |
| Asthma  | SES        | Combined   | 0.705069  | 0.7222295 | 6.85E-10  | 3.70E-04 |
| Asthma  | Individual | Area       | 0.7146287 | 0.7065746 | 6.98E-03  | 3.70E-04 |
| Asthma  | Individual | Combined   | 0.7146287 | 0.7222295 | 3.04E-06  | 3.70E-04 |
| Asthma  | Area       | Combined   | 0.7065746 | 0.7222295 | 6.57E-12  | 3.70E-04 |
| BreastC | Base       | SIRE       | 0.7136544 | 0.7148903 | 2.72E-02  | 3.70E-04 |
| BreastC | Base       | SES        | 0.7136544 | 0.7175904 | 3.77E-03  | 3.70E-04 |
| BreastC | Base       | Individual | 0.7136544 | 0.7205704 | 4.67E-05  | 3.70E-04 |
| BreastC | Base       | Area       | 0.7136544 | 0.7155766 | 3.68E-02  | 3.70E-04 |
| BreastC | Base       | Combined   | 0.7136544 | 0.721803  | 9.23E-06  | 3.70E-04 |
| BreastC | SIRE       | SES        | 0.7148903 | 0.7175904 | 4.26E-02  | 3.70E-04 |
| BreastC | SIRE       | Individual | 0.7148903 | 0.7205704 | 6.71E-04  | 3.70E-04 |
| BreastC | SIRE       | Area       | 0.7148903 | 0.7155766 | 5.06E-01  | 3.70E-04 |
| BreastC | SIRE       | Combined   | 0.7148903 | 0.721803  | 1.37E-04  | 3.70E-04 |
| BreastC | SES        | Individual | 0.7175904 | 0.7205704 | 7.18E-02  | 3.70E-04 |
| BreastC | SES        | Area       | 0.7175904 | 0.7155766 | 1.66E-01  | 3.70E-04 |
| BreastC | SES        | Combined   | 0.7175904 | 0.721803  | 1.67E-02  | 3.70E-04 |

|         |            |            |           |           |           |          |
|---------|------------|------------|-----------|-----------|-----------|----------|
| BreastC | Individual | Area       | 0.7205704 | 0.7155766 | 6.25E-03  | 3.70E-04 |
| BreastC | Individual | Combined   | 0.7205704 | 0.721803  | 1.44E-02  | 3.70E-04 |
| BreastC | Area       | Combined   | 0.7155766 | 0.721803  | 3.23E-04  | 3.70E-04 |
| CHD     | Base       | SIRE       | 0.7999508 | 0.8001358 | 1.58E-01  | 3.70E-04 |
| CHD     | Base       | SES        | 0.7999508 | 0.8036813 | 9.70E-12  | 3.70E-04 |
| CHD     | Base       | Individual | 0.7999508 | 0.8008117 | 5.97E-03  | 3.70E-04 |
| CHD     | Base       | Area       | 0.7999508 | 0.7999726 | 4.25E-01  | 3.70E-04 |
| CHD     | Base       | Combined   | 0.7999508 | 0.8007473 | 9.78E-03  | 3.70E-04 |
| CHD     | SIRE       | SES        | 0.8001358 | 0.8036813 | 8.08E-11  | 3.70E-04 |
| CHD     | SIRE       | Individual | 0.8001358 | 0.8008117 | 4.55E-02  | 3.70E-04 |
| CHD     | SIRE       | Area       | 0.8001358 | 0.7999726 | 2.20E-01  | 3.70E-04 |
| CHD     | SIRE       | Combined   | 0.8001358 | 0.8007473 | 0.0656899 | 3.70E-04 |
| CHD     | SES        | Individual | 0.8036813 | 0.8008117 | 7.64E-07  | 3.70E-04 |
| CHD     | SES        | Area       | 0.8036813 | 0.7999726 | 9.46E-12  | 3.70E-04 |
| CHD     | SES        | Combined   | 0.8036813 | 0.8007473 | 4.96E-07  | 3.70E-04 |
| CHD     | Individual | Area       | 0.8008117 | 0.7999726 | 7.69E-03  | 3.70E-04 |
| CHD     | Individual | Combined   | 0.8008117 | 0.8007473 | 3.76E-01  | 3.70E-04 |
| CHD     | Area       | Combined   | 0.7999726 | 0.8007473 | 1.41E-02  | 3.70E-04 |
| CKD     | Base       | SIRE       | 0.8638855 | 0.8770502 | 1.45E-24  | 3.70E-04 |
| CKD     | Base       | SES        | 0.8638855 | 0.8723753 | 2.37E-19  | 3.70E-04 |
| CKD     | Base       | Individual | 0.8638855 | 0.8662679 | 6.00E-06  | 3.70E-04 |
| CKD     | Base       | Area       | 0.8638855 | 0.8662052 | 2.26E-07  | 3.70E-04 |
| CKD     | Base       | Combined   | 0.8638855 | 0.866747  | 5.94E-07  | 3.70E-04 |
| CKD     | SIRE       | SES        | 0.8770502 | 0.8723753 | 6.36E-04  | 3.70E-04 |
| CKD     | SIRE       | Individual | 0.8770502 | 0.8662679 | 2.85E-16  | 3.70E-04 |
| CKD     | SIRE       | Area       | 0.8770502 | 0.8662052 | 5.32E-17  | 3.70E-04 |
| CKD     | SIRE       | Combined   | 0.8770502 | 0.866747  | 3.63E-15  | 3.70E-04 |
| CKD     | SES        | Individual | 0.8723753 | 0.8662679 | 5.56E-12  | 3.70E-04 |
| CKD     | SES        | Area       | 0.8723753 | 0.8662052 | 7.16E-10  | 3.70E-04 |
| CKD     | SES        | Combined   | 0.8723753 | 0.866747  | 3.22E-10  | 3.70E-04 |
| CKD     | Individual | Area       | 0.8662679 | 0.8662052 | 9.25E-01  | 3.70E-04 |
| CKD     | Individual | Combined   | 0.8662679 | 0.866747  | 4.00E-05  | 3.70E-04 |
| CKD     | Area       | Combined   | 0.8662052 | 0.866747  | 3.99E-01  | 3.70E-04 |
| HyperC  | Base       | SIRE       | 0.8305252 | 0.8313223 | 0.0053589 | 3.70E-04 |
| HyperC  | Base       | SES        | 0.8305252 | 0.8341411 | 1.45E-05  | 3.70E-04 |
| HyperC  | Base       | Individual | 0.8305252 | 0.8314138 | 1.80E-02  | 3.70E-04 |
| HyperC  | Base       | Area       | 0.8305252 | 0.8322847 | 0.0010843 | 3.70E-04 |
| HyperC  | Base       | Combined   | 0.8305252 | 0.8317432 | 4.33E-03  | 3.70E-04 |
| HyperC  | SIRE       | SES        | 0.8313223 | 0.8341411 | 5.92E-04  | 3.70E-04 |
| HyperC  | SIRE       | Individual | 0.8313223 | 0.8314138 | 8.44E-01  | 3.70E-04 |
| HyperC  | SIRE       | Area       | 0.8313223 | 0.8322847 | 1.23E-01  | 3.70E-04 |
| HyperC  | SIRE       | Combined   | 0.8313223 | 0.8317432 | 4.06E-01  | 3.70E-04 |
| HyperC  | SES        | Individual | 0.8341411 | 0.8314138 | 8.44E-04  | 3.70E-04 |
| HyperC  | SES        | Area       | 0.8341411 | 0.8322847 | 5.41E-02  | 3.70E-04 |

|           |            |            |           |           |           |          |
|-----------|------------|------------|-----------|-----------|-----------|----------|
| HyperC    | SES        | Combined   | 0.8341411 | 0.8317432 | 3.85E-03  | 3.70E-04 |
| HyperC    | Individual | Area       | 0.8314138 | 0.8322847 | 0.1633792 | 3.70E-04 |
| HyperC    | Individual | Combined   | 0.8314138 | 0.8317432 | 6.69E-05  | 3.70E-04 |
| HyperC    | Area       | Combined   | 0.8322847 | 0.8317432 | 3.68E-01  | 3.70E-04 |
| ProstateC | Base       | SIRE       | 0.6383231 | 0.6472552 | 1.59E-03  | 3.70E-04 |
| ProstateC | Base       | SES        | 0.6383231 | 0.6970582 | 1.01E-20  | 3.70E-04 |
| ProstateC | Base       | Individual | 0.6383231 | 0.7067397 | 4.43E-25  | 3.70E-04 |
| ProstateC | Base       | Area       | 0.6383231 | 0.7458262 | 2.86E-50  | 3.70E-04 |
| ProstateC | Base       | Combined   | 0.6383231 | 0.7677461 | 4.18E-65  | 3.70E-04 |
| ProstateC | SIRE       | SES        | 0.6472552 | 0.6970582 | 3.77E-13  | 3.70E-04 |
| ProstateC | SIRE       | Individual | 0.6472552 | 0.7067397 | 1.63E-16  | 3.70E-04 |
| ProstateC | SIRE       | Area       | 0.6472552 | 0.7458262 | 7.15E-41  | 3.70E-04 |
| ProstateC | SIRE       | Combined   | 0.6472552 | 0.7677461 | 2.73E-52  | 3.70E-04 |
| ProstateC | SES        | Individual | 0.6970582 | 0.7067397 | 4.90E-03  | 3.70E-04 |
| ProstateC | SES        | Area       | 0.6970582 | 0.7458262 | 3.60E-10  | 3.70E-04 |
| ProstateC | SES        | Combined   | 0.6970582 | 0.7677461 | 3.52E-34  | 3.70E-04 |
| ProstateC | Individual | Area       | 0.7067397 | 0.7458262 | 4.99E-07  | 3.70E-04 |
| ProstateC | Individual | Combined   | 0.7067397 | 0.7677461 | 3.21E-35  | 3.70E-04 |
| ProstateC | Area       | Combined   | 0.7458262 | 0.7677461 | 4.81E-07  | 3.70E-04 |
| t1d       | Base       | SIRE       | 0.6458432 | 0.6776553 | 3.35E-05  | 3.70E-04 |
| t1d       | Base       | SES        | 0.6458432 | 0.7049454 | 1.99E-08  | 3.70E-04 |
| t1d       | Base       | Individual | 0.6458432 | 0.7350468 | 2.24E-16  | 3.70E-04 |
| t1d       | Base       | Area       | 0.6458432 | 0.6594799 | 1.19E-02  | 3.70E-04 |
| t1d       | Base       | Combined   | 0.6458432 | 0.7366608 | 1.28E-16  | 3.70E-04 |
| t1d       | SIRE       | SES        | 0.6776553 | 0.7049454 | 5.28E-03  | 3.70E-04 |
| t1d       | SIRE       | Individual | 0.6776553 | 0.7350468 | 3.60E-08  | 3.70E-04 |
| t1d       | SIRE       | Area       | 0.6776553 | 0.6594799 | 8.74E-03  | 3.70E-04 |
| t1d       | SIRE       | Combined   | 0.6776553 | 0.7366608 | 9.05E-09  | 3.70E-04 |
| t1d       | SES        | Individual | 0.7049454 | 0.7350468 | 1.55E-06  | 3.70E-04 |
| t1d       | SES        | Area       | 0.7049454 | 0.6594799 | 7.02E-06  | 3.70E-04 |
| t1d       | SES        | Combined   | 0.7049454 | 0.7366608 | 8.52E-07  | 3.70E-04 |
| t1d       | Individual | Area       | 0.7350468 | 0.6594799 | 5.57E-13  | 3.70E-04 |
| t1d       | Individual | Combined   | 0.7350468 | 0.7366608 | 2.51E-01  | 3.70E-04 |
| t1d       | Area       | Combined   | 0.6594799 | 0.7366608 | 1.46E-14  | 3.70E-04 |
| t2d       | Base       | SIRE       | 0.7100627 | 0.7485824 | 1.22E-71  | 3.70E-04 |
| t2d       | Base       | SES        | 0.7100627 | 0.7672262 | 1.99E-105 | 3.70E-04 |
| t2d       | Base       | Individual | 0.7100627 | 0.7704882 | 2.38E-119 | 3.70E-04 |
| t2d       | Base       | Area       | 0.7100627 | 0.723405  | 3.48E-21  | 3.70E-04 |
| t2d       | Base       | Combined   | 0.7100627 | 0.7728424 | 3.12E-125 | 3.70E-04 |
| t2d       | SIRE       | SES        | 0.7485824 | 0.7672262 | 2.17E-12  | 3.70E-04 |
| t2d       | SIRE       | Individual | 0.7485824 | 0.7704882 | 1.36E-16  | 3.70E-04 |
| t2d       | SIRE       | Area       | 0.7485824 | 0.723405  | 3.66E-32  | 3.70E-04 |
| t2d       | SIRE       | Combined   | 0.7485824 | 0.7728424 | 7.28E-21  | 3.70E-04 |
| t2d       | SES        | Individual | 0.7672262 | 0.7704882 | 3.54E-02  | 3.70E-04 |

|     |            |          |           |           |          |          |
|-----|------------|----------|-----------|-----------|----------|----------|
| t2d | SES        | Area     | 0.7672262 | 0.723405  | 5.23E-62 | 3.70E-04 |
| t2d | SES        | Combined | 0.7672262 | 0.7728424 | 5.72E-04 | 3.70E-04 |
| t2d | Individual | Area     | 0.7704882 | 0.723405  | 6.05E-73 | 3.70E-04 |
| t2d | Individual | Combined | 0.7704882 | 0.7728424 | 3.71E-05 | 3.70E-04 |
| t2d | Area       | Combined | 0.723405  | 0.7728424 | 1.19E-92 | 3.70E-04 |

p\_value\_bon significant

|           |       |
|-----------|-------|
| 1         | FALSE |
| 1.00E+00  | FALSE |
| 1         | FALSE |
| 9.98E-10  | TRUE  |
| 2.51E-06  | TRUE  |
| 1.00E+00  | FALSE |
| 1.00E+00  | FALSE |
| 1.11E-05  | TRUE  |
| 0.0031504 | TRUE  |
| 1         | FALSE |
| 1.24E-07  | TRUE  |
| 3.33E-04  | TRUE  |
| 2.18E-06  | TRUE  |
| 9.62E-09  | TRUE  |
| 1.00E+00  | FALSE |
| 1.00E+00  | FALSE |
| 1.00E+00  | FALSE |
| 2.54E-03  | TRUE  |
| 1.00E+00  | FALSE |
| 2.41E-08  | TRUE  |
| 1.00E+00  | FALSE |
| 1.60E-03  | TRUE  |
| 1.00E+00  | FALSE |
| 9.56E-09  | TRUE  |
| 7.13E-03  | TRUE  |
| 1.00E+00  | FALSE |
| 9.25E-08  | TRUE  |
| 9.42E-01  | FALSE |
| 4.10E-04  | TRUE  |
| 8.86E-10  | TRUE  |
| 1.00E+00  | FALSE |
| 5.09E-01  | FALSE |
| 6.30E-03  | TRUE  |
| 1         | FALSE |
| 0.0012462 | TRUE  |
| 1.00E+00  | FALSE |
| 0.0905652 | FALSE |
| 1.00E+00  | FALSE |
| 1.85E-02  | TRUE  |
| 1         | FALSE |
| 1.00E+00  | FALSE |
| 1         | FALSE |

|           |       |
|-----------|-------|
| 8.44E-01  | FALSE |
| 1.00E+00  | FALSE |
| 4.36E-02  | TRUE  |
| 1.00E+00  | FALSE |
| 1.31E-09  | TRUE  |
| 8.06E-01  | FALSE |
| 1.00E+00  | FALSE |
| 1         | FALSE |
| 1.09E-08  | TRUE  |
| 1.00E+00  | FALSE |
| 1.00E+00  | FALSE |
| 1         | FALSE |
| 1.03E-04  | TRUE  |
| 1.28E-09  | TRUE  |
| 6.70E-05  | TRUE  |
| 1.00E+00  | FALSE |
| 1.00E+00  | FALSE |
| 1.00E+00  | FALSE |
| 1.96E-22  | TRUE  |
| 3.20E-17  | TRUE  |
| 8.10E-04  | TRUE  |
| 3.06E-05  | TRUE  |
| 8.02E-05  | TRUE  |
| 8.58E-02  | FALSE |
| 3.85E-14  | TRUE  |
| 7.18E-15  | TRUE  |
| 4.90E-13  | TRUE  |
| 7.51E-10  | TRUE  |
| 9.67E-08  | TRUE  |
| 4.34E-08  | TRUE  |
| 1.00E+00  | FALSE |
| 0.0053956 | TRUE  |
| 1         | FALSE |
| 0.7234467 | FALSE |
| 0.0019596 | TRUE  |
| 1         | FALSE |
| 0.1463865 | FALSE |
| 5.85E-01  | FALSE |
| 7.99E-02  | FALSE |
| 1.00E+00  | FALSE |
| 1.00E+00  | FALSE |
| 1.00E+00  | FALSE |
| 1.14E-01  | FALSE |
| 1         | FALSE |

|           |       |
|-----------|-------|
| 5.20E-01  | FALSE |
| 1         | FALSE |
| 0.0090278 | TRUE  |
| 1         | FALSE |
| 2.15E-01  | FALSE |
| 1.36E-18  | TRUE  |
| 5.98E-23  | TRUE  |
| 3.87E-48  | TRUE  |
| 5.64E-63  | TRUE  |
| 5.09E-11  | TRUE  |
| 2.20E-14  | TRUE  |
| 9.65E-39  | TRUE  |
| 3.69E-50  | TRUE  |
| 6.62E-01  | FALSE |
| 4.87E-08  | TRUE  |
| 4.75E-32  | TRUE  |
| 6.74E-05  | TRUE  |
| 4.33E-33  | TRUE  |
| 6.50E-05  | TRUE  |
| 4.53E-03  | TRUE  |
| 2.69E-06  | TRUE  |
| 3.03E-14  | TRUE  |
| 1.00E+00  | FALSE |
| 1.73E-14  | TRUE  |
| 7.12E-01  | FALSE |
| 4.86E-06  | TRUE  |
| 1.00E+00  | FALSE |
| 1.22E-06  | TRUE  |
| 2.09E-04  | TRUE  |
| 9.47E-04  | TRUE  |
| 1.15E-04  | TRUE  |
| 7.53E-11  | TRUE  |
| 1.00E+00  | FALSE |
| 1.97E-12  | TRUE  |
| 1.65E-69  | TRUE  |
| 2.69E-103 | TRUE  |
| 3.21E-117 | TRUE  |
| 4.70E-19  | TRUE  |
| 4.21E-123 | TRUE  |
| 2.93E-10  | TRUE  |
| 1.84E-14  | TRUE  |
| 4.95E-30  | TRUE  |
| 9.83E-19  | TRUE  |
| 1.00E+00  | FALSE |

|          |       |
|----------|-------|
| 7.06E-60 | TRUE  |
| 7.73E-02 | FALSE |
| 8.16E-71 | TRUE  |
| 5.01E-03 | TRUE  |
| 1.60E-90 | TRUE  |



Supplementary Table 5 (S4): PsRS EN summary results in SES cohort. Reported values incl

| model    | Disease   | mean_train_ | sd_train_sco | mean_test_s | sd_test_scor | mean_AUC  |
|----------|-----------|-------------|--------------|-------------|--------------|-----------|
| Area     | Asthma    | 1.0952981   | 0.0052313    | 0.1274257   | 0.0065306    | 0.5799249 |
| Area     | Afib      | 1.229052    | 0.0024484    | 0.1339067   | 0.0096113    | 0.5758246 |
| Area     | BreastC   | 0.4943668   | 0.0013334    | 0.0627517   | 0.0060817    | 0.5       |
| Area     | CKD       | 1.0840384   | 0.0022987    | 0.069214    | 0.0109746    | 0.5076094 |
| Area     | CHD       | 0.7461801   | 0.0012701    | 0.0492593   | 0.0062174    | 0.5       |
| Area     | HyperC    | 1.1930615   | 1.79E-03     | 0.0762674   | 0.00818      | 0.5       |
| Area     | ProstateC | 1.2015245   | 0.0033003    | 0.3148597   | 0.0093566    | 0.7079087 |
| Area     | t2d       | 1.2589407   | 0.001833     | 0.1211339   | 0.0072272    | 0.5825463 |
| Area     | t1d       | 0.2704555   | 0.0048867    | 0.0356646   | 0.0099541    | 0.5       |
| Combined | Asthma    | 1.0949276   | 0.0052488    | 0.1289902   | 0.0065373    | 0.5810333 |
| Combined | Afib      | 1.2217362   | 0.0028115    | 0.1575634   | 0.011532     | 0.599295  |
| Combined | BreastC   | 0.4882323   | 0.0011957    | 0.1003609   | 0.0064599    | 0.6039587 |
| Combined | CKD       | 1.0793369   | 0.0028125    | 0.0959865   | 0.0112007    | 0.5566738 |
| Combined | CHD       | 0.744876    | 0.001335     | 0.0609125   | 0.0048792    | 0.5178487 |
| Combined | HyperC    | 1.1885866   | 1.73E-03     | 0.1048942   | 0.0035188    | 0.5475116 |
| Combined | ProstateC | 1.1656886   | 0.0047298    | 0.3676296   | 0.0124812    | 0.7238756 |
| Combined | t2d       | 1.2077045   | 0.0013545    | 0.2543643   | 0.0076435    | 0.6565737 |
| Combined | t1d       | 0.2681933   | 0.005        | 0.057872    | 0.0029063    | 0.5       |

lude the mean and standard deviation of training scores (mean\_train\_score, sd\_

| sd_AUC    | n_predictors | Predictors   | mean_coef      | sd_coef       | coef_nonzero  | Intercept  |
|-----------|--------------|--------------|----------------|---------------|---------------|------------|
| 0.0030342 | 6            | assisted_inc | 2.546675,-0.0  | 0.166037,0.15 | 5,5,5,5,5     | -0.7849238 |
| 0.004495  | 6            | assisted_inc | -0.326572,0.0  | 0.184697,0.15 | 5,5,5,5,5     | -0.7531398 |
| 0         | 6            | assisted_inc | 0.137515,0.40  | 0.218656,0.12 | 5,5,2,5,5     | -1.9603606 |
| 0.0170152 | 6            | assisted_inc | -0.853206,0.0  | 0.064125,0.0  | 5,5,5,5,2,5   | -1.2198138 |
| 0         | 6            | assisted_inc | -0.342312,0.0  | 0.177356,0.0  | 5,5,5,5,5,5   | -1.5744234 |
| 0         | 6            | assisted_inc | 0.219629,0.5   | 0.069326,0.0  | 5,5,5,4,5,5   | 0.8302984  |
| 0.0032113 | 6            | assisted_inc | 9.857014,-4.0  | 0.297111,0.15 | 5,5,5,5,5,5   | 0.1862224  |
| 0.0016702 | 6            | assisted_inc | -2.115847,2.0  | 0.176047,0.0  | 5,5,5,5,5,5   | -1.0564801 |
| 0         | 6            | assisted_inc | -1.514091,1.0  | 0.297169,0.2  | 5,5,4,4,5,5   | -3.7595784 |
| 2.39E-03  | 8            | per_poverty_ | -0.245058,-0.0 | 0.05998,0.015 | 5,5,5,5,5,5,5 | -0.6810028 |
| 0.0038313 | 8            | per_poverty_ | 0.546673,0.3   | 0.088866,0.0  | 5,5,5,5,5,5,5 | -1.242264  |
| 0.002771  | 8            | per_poverty_ | 1.32938,0.30   | 0.039056,0.0  | 5,5,1,5,5,5,5 | -2.6977502 |
| 0.0081946 | 7            | per_poverty_ | -0.554912,-0.0 | 0.070552,0.0  | 5,5,5,5,5,5,5 | -0.7670755 |
| 0.0244755 | 8            | per_poverty_ | 0.137638,-0.0  | 0.053727,0.0  | 5,5,5,5,5,5,5 | -1.3068693 |
| 0.0016929 | 8            | per_poverty_ | 0.587419,-0.0  | 0.064423,0.0  | 5,5,5,5,5,4,5 | 1.0899848  |
| 0.0042551 | 8            | per_poverty_ | 1.879684,0.5   | 0.091916,0.0  | 5,5,5,5,5,5,5 | -0.9378898 |
| 0.0018592 | 8            | per_poverty_ | -1.628339,-0.0 | 0.035039,0.0  | 5,5,5,5,5,3,5 | 0.2479281  |
| 0         | 8            | per_poverty_ | -1.261865,-0.0 | 0.148291,0.0  | 5,5,5,5,4,4,5 | -3.1413368 |

full\_data\_coef

-0.784924,2.616346,-0.787405,-0.537886,-1.712119,-1.467681,0.648704,0  
-0.75314,-0.297858,0.107836,0.664835,1.221317,-3.106755,0.847964,0  
-1.960361,0.048478,0.53067,-1.176483,0,-1.352305,1.404427,0  
-1.219814,-0.807986,0.536753,-0.318718,0.42842,0,1.535463,0  
-1.574423,-0.391554,0.758748,-0.905512,0.041318,-0.293353,0.985309,0  
0.830298,0.312378,0.528985,0.489146,-0.032399,-2.345186,0.815631,0  
0.186222,9.671646,-4.100271,-3.387731,-0.17013,-4.026705,4.322257,0  
-1.05648,-2.029071,2.367047,-0.031693,-0.228959,1.335213,1.180548,0  
-3.759578,-0.918123,1.119843,0,0,0.657069,0.968933,0  
-0.681003,-0.249308,-0.020496,2.67995,-0.865762,-0.580744,-1.681497,-1.556286,0.63360  
-1.242264,0.549089,0.374049,-0.317934,0.409285,0.748488,1.105284,-3.023326,1.041734  
-2.69775,1.330902,0.277619,0,0.762663,-0.901511,-0.026215,-1.096537,1.431826,0  
-0.767075,-0.587445,-0.280151,-0.741059,0.30757,-0.518024,0.427714,0,1.458357,0  
-1.306869,0.12632,-0.397367,-0.310826,0.596828,-0.925827,0.099145,-0.417326,0.94776,  
1.089985,0.591612,-0.596567,0.336253,0.385627,0.535018,0,-2.353115,0.768825,0  
-0.93789,1.845159,0.581793,9.587567,-3.416286,-3.040322,-0.367987,-4.188655,4.467156  
0.247928,-1.643719,-0.975866,-1.562434,1.636435,-0.373171,0,0.700305,0.907016,0  
-3.141337,-1.272063,-0.315047,-1.172805,1.054586,0,-0.023375,0.54497,0.826126,0

01,0  
1,0

0

3,0

Supplementary Table 5 (S5): Logistic regression summary results

| Model    | Disease                | AUC       | AUC_CI_Low | AUC_CI_Upper |
|----------|------------------------|-----------|------------|--------------|
| Base     | Asthma                 | 0.6743152 | 0.6686778  | 0.6799526    |
| SIRE     | Asthma                 | 0.672757  | 0.667122   | 0.678392     |
| SES      | Asthma                 | 0.6731664 | 0.6675324  | 0.6788005    |
| Area     | Asthma                 | 0.6740692 | 0.6685026  | 0.6796358    |
| Combined | Asthma                 | 0.6745292 | 0.6689601  | 0.6800984    |
| Base     | Atrial Fibrillation    | 0.729538  | 0.7229296  | 0.7361463    |
| SIRE     | Atrial Fibrillation    | 0.737629  | 0.7310924  | 0.7441656    |
| SES      | Atrial Fibrillation    | 0.7298311 | 0.7232278  | 0.7364345    |
| Area     | Atrial Fibrillation    | 0.7373093 | 0.7307838  | 0.7438347    |
| Combined | Atrial Fibrillation    | 0.7366476 | 0.7301183  | 0.743177     |
| Base     | Breast Cancer          | 0.7305938 | 0.7244339  | 0.7367537    |
| SIRE     | Breast Cancer          | 0.7348288 | 0.7287263  | 0.7409314    |
| SES      | Breast Cancer          | 0.7399405 | 0.7338988  | 0.7459822    |
| Area     | Breast Cancer          | 0.7339819 | 0.7278832  | 0.7400806    |
| Combined | Breast Cancer          | 0.7427026 | 0.7366903  | 0.7487149    |
| Base     | Chronic Kidney Disease | 0.8642224 | 0.860091   | 0.8683538    |
| SIRE     | Chronic Kidney Disease | 0.8810583 | 0.8771938  | 0.8849228    |
| SES      | Chronic Kidney Disease | 0.8761124 | 0.8722429  | 0.8799819    |
| Area     | Chronic Kidney Disease | 0.8686124 | 0.8646001  | 0.8726247    |
| Combined | Chronic Kidney Disease | 0.8764225 | 0.872577   | 0.880268     |
| Base     | Coronary Heart Disease | 0.7966307 | 0.7930722  | 0.8001892    |
| SIRE     | Coronary Heart Disease | 0.7978642 | 0.7943328  | 0.8013956    |
| SES      | Coronary Heart Disease | 0.8030433 | 0.7995831  | 0.8065034    |
| Area     | Coronary Heart Disease | 0.796634  | 0.7930758  | 0.8001922    |
| Combined | Coronary Heart Disease | 0.7981727 | 0.7946375  | 0.8017078    |
| Base     | Hypercholesterolemia   | 0.8416533 | 0.8369191  | 0.8463876    |
| SIRE     | Hypercholesterolemia   | 0.8426584 | 0.8379443  | 0.8473725    |
| SES      | Hypercholesterolemia   | 0.8443787 | 0.8396916  | 0.8490659    |
| Area     | Hypercholesterolemia   | 0.8428815 | 0.8381689  | 0.8475941    |
| Combined | Hypercholesterolemia   | 0.8434314 | 0.8387341  | 0.8481288    |
| Base     | Prostate Cancer        | 0.6300935 | 0.6187972  | 0.6413897    |
| SIRE     | Prostate Cancer        | 0.641883  | 0.6306421  | 0.6531238    |
| SES      | Prostate Cancer        | 0.674808  | 0.6637104  | 0.6859056    |
| Area     | Prostate Cancer        | 0.7521136 | 0.7420287  | 0.7621986    |
| Combined | Prostate Cancer        | 0.7639392 | 0.7540149  | 0.7738635    |
| Base     | Type 2 Diabetes        | 0.7085451 | 0.7042938  | 0.7127964    |
| SIRE     | Type 2 Diabetes        | 0.7583601 | 0.7543707  | 0.7623495    |
| SES      | Type 2 Diabetes        | 0.7717666 | 0.7679253  | 0.7756078    |
| Area     | Type 2 Diabetes        | 0.7302597 | 0.7261416  | 0.7343778    |
| Combined | Type 2 Diabetes        | 0.7745743 | 0.7707603  | 0.7783882    |
| Base     | Type 1 Diabetes        | 0.6264655 | 0.6092075  | 0.6437234    |
| SIRE     | Type 1 Diabetes        | 0.6455917 | 0.6288035  | 0.6623799    |

|          |             |           |           |           |
|----------|-------------|-----------|-----------|-----------|
| SES      | Type 1 Diab | 0.6645067 | 0.6488102 | 0.6802032 |
| Area     | Type 1 Diab | 0.6465102 | 0.6301735 | 0.6628468 |
| Combined | Type 1 Diab | 0.6717248 | 0.6561201 | 0.6873295 |

Supplementary Table 5 (S6): AUC pair-wise comparisons in SES cohort

| Disease | Model1 | Model2   | AUC1      | AUC2      | p_value   | bonf_p   |
|---------|--------|----------|-----------|-----------|-----------|----------|
| Afib    | Base   | SIRE     | 0.729538  | 0.737629  | 4.21E-17  | 5.56E-04 |
| Afib    | Base   | SES      | 0.729538  | 0.7298311 | 1.92E-01  | 5.56E-04 |
| Afib    | Base   | Area     | 0.729538  | 0.7373093 | 4.76E-17  | 5.56E-04 |
| Afib    | Base   | Combined | 0.729538  | 0.7366476 | 2.27E-15  | 5.56E-04 |
| Afib    | SIRE   | SES      | 0.737629  | 0.7298311 | 3.99E-18  | 5.56E-04 |
| Afib    | SIRE   | Area     | 0.737629  | 0.7373093 | 7.76E-01  | 5.56E-04 |
| Afib    | SIRE   | Combined | 0.737629  | 0.7366476 | 0.3282942 | 5.56E-04 |
| Afib    | SES    | Area     | 0.7298311 | 0.7373093 | 6.13E-16  | 5.56E-04 |
| Afib    | SES    | Combined | 0.7298311 | 0.7366476 | 5.88E-18  | 5.56E-04 |
| Afib    | Area   | Combined | 0.7373093 | 0.7366476 | 1.84E-01  | 5.56E-04 |
| Asthma  | Base   | SIRE     | 0.6743152 | 0.672757  | 4.97E-08  | 5.56E-04 |
| Asthma  | Base   | SES      | 0.6743152 | 0.6731664 | 2.15E-14  | 5.56E-04 |
| Asthma  | Base   | Area     | 0.6743152 | 0.6740692 | 8.56E-01  | 5.56E-04 |
| Asthma  | Base   | Combined | 0.6743152 | 0.6745292 | 8.73E-01  | 5.56E-04 |
| Asthma  | SIRE   | SES      | 0.672757  | 0.6731664 | 1.17E-01  | 5.56E-04 |
| Asthma  | SIRE   | Area     | 0.672757  | 0.6740692 | 3.21E-01  | 5.56E-04 |
| Asthma  | SIRE   | Combined | 0.672757  | 0.6745292 | 0.1803996 | 5.56E-04 |
| Asthma  | SES    | Area     | 0.6731664 | 0.6740692 | 5.01E-01  | 5.56E-04 |
| Asthma  | SES    | Combined | 0.6731664 | 0.6745292 | 3.12E-01  | 5.56E-04 |
| Asthma  | Area   | Combined | 0.6740692 | 0.6745292 | 2.92E-02  | 5.56E-04 |
| BreastC | Base   | SIRE     | 0.7305938 | 0.7348288 | 1.51E-06  | 5.56E-04 |
| BreastC | Base   | SES      | 0.7305938 | 0.7399405 | 8.49E-13  | 5.56E-04 |
| BreastC | Base   | Area     | 0.7305938 | 0.7339819 | 8.57E-05  | 5.56E-04 |
| BreastC | Base   | Combined | 0.7305938 | 0.7427026 | 1.17E-17  | 5.56E-04 |
| BreastC | SIRE   | SES      | 0.7348288 | 0.7399405 | 3.00E-05  | 5.56E-04 |
| BreastC | SIRE   | Area     | 0.7348288 | 0.7339819 | 4.40E-01  | 5.56E-04 |
| BreastC | SIRE   | Combined | 0.7348288 | 0.7427026 | 3.61E-09  | 5.56E-04 |
| BreastC | SES    | Area     | 0.7399405 | 0.7339819 | 1.83E-05  | 5.56E-04 |
| BreastC | SES    | Combined | 0.7399405 | 0.7427026 | 3.48E-05  | 5.56E-04 |
| BreastC | Area   | Combined | 0.7339819 | 0.7427026 | 1.22E-14  | 5.56E-04 |
| CHD     | Base   | SIRE     | 0.7966307 | 0.7978642 | 5.39E-09  | 5.56E-04 |
| CHD     | Base   | SES      | 0.7966307 | 0.8030433 | 1.39E-40  | 5.56E-04 |
| CHD     | Base   | Area     | 0.7966307 | 0.796634  | 9.28E-01  | 5.56E-04 |
| CHD     | Base   | Combined | 0.7966307 | 0.7981727 | 5.15E-11  | 5.56E-04 |
| CHD     | SIRE   | SES      | 0.7978642 | 0.8030433 | 1.46E-31  | 5.56E-04 |
| CHD     | SIRE   | Area     | 0.7978642 | 0.796634  | 1.08E-08  | 5.56E-04 |
| CHD     | SIRE   | Combined | 0.7978642 | 0.7981727 | 0.2914896 | 5.56E-04 |
| CHD     | SES    | Area     | 0.8030433 | 0.796634  | 1.07E-39  | 5.56E-04 |
| CHD     | SES    | Combined | 0.8030433 | 0.7981727 | 8.34E-29  | 5.56E-04 |
| CHD     | Area   | Combined | 0.796634  | 0.7981727 | 1.27E-13  | 5.56E-04 |
| CKD     | Base   | SIRE     | 0.8642224 | 0.8810583 | 3.00E-75  | 5.56E-04 |
| CKD     | Base   | SES      | 0.8642224 | 0.8761124 | 2.66E-62  | 5.56E-04 |

|           |      |          |           |           |           |          |
|-----------|------|----------|-----------|-----------|-----------|----------|
| CKD       | Base | Area     | 0.8642224 | 0.8686124 | 3.51E-31  | 5.56E-04 |
| CKD       | Base | Combined | 0.8642224 | 0.8764225 | 7.35E-69  | 5.56E-04 |
| CKD       | SIRE | SES      | 0.8810583 | 0.8761124 | 7.09E-08  | 5.56E-04 |
| CKD       | SIRE | Area     | 0.8810583 | 0.8686124 | 7.64E-44  | 5.56E-04 |
| CKD       | SIRE | Combined | 0.8810583 | 0.8764225 | 2.75E-07  | 5.56E-04 |
| CKD       | SES  | Area     | 0.8761124 | 0.8686124 | 1.26E-23  | 5.56E-04 |
| CKD       | SES  | Combined | 0.8761124 | 0.8764225 | 5.20E-01  | 5.56E-04 |
| CKD       | Area | Combined | 0.8686124 | 0.8764225 | 1.63E-55  | 5.56E-04 |
| HyperC    | Base | SIRE     | 0.8416533 | 0.8426584 | 9.74E-07  | 5.56E-04 |
| HyperC    | Base | SES      | 0.8416533 | 0.8443787 | 2.16E-09  | 5.56E-04 |
| HyperC    | Base | Area     | 0.8416533 | 0.8428815 | 1.81E-05  | 5.56E-04 |
| HyperC    | Base | Combined | 0.8416533 | 0.8434314 | 1.08E-06  | 5.56E-04 |
| HyperC    | SIRE | SES      | 0.8426584 | 0.8443787 | 4.78E-05  | 5.56E-04 |
| HyperC    | SIRE | Area     | 0.8426584 | 0.8428815 | 5.55E-01  | 5.56E-04 |
| HyperC    | SIRE | Combined | 0.8426584 | 0.8434314 | 7.03E-02  | 5.56E-04 |
| HyperC    | SES  | Area     | 0.8443787 | 0.8428815 | 5.30E-03  | 5.56E-04 |
| HyperC    | SES  | Combined | 0.8443787 | 0.8434314 | 5.73E-02  | 5.56E-04 |
| HyperC    | Area | Combined | 0.8428815 | 0.8434314 | 2.92E-02  | 5.56E-04 |
| ProstateC | Base | SIRE     | 0.6300935 | 0.641883  | 3.17E-06  | 5.56E-04 |
| ProstateC | Base | SES      | 0.6300935 | 0.674808  | 3.08E-25  | 5.56E-04 |
| ProstateC | Base | Area     | 0.6300935 | 0.7521136 | 1.17E-104 | 5.56E-04 |
| ProstateC | Base | Combined | 0.6300935 | 0.7639392 | 1.62E-120 | 5.56E-04 |
| ProstateC | SIRE | SES      | 0.641883  | 0.674808  | 2.56E-10  | 5.56E-04 |
| ProstateC | SIRE | Area     | 0.641883  | 0.7521136 | 1.47E-83  | 5.56E-04 |
| ProstateC | SIRE | Combined | 0.641883  | 0.7639392 | 8.21E-92  | 5.56E-04 |
| ProstateC | SES  | Area     | 0.674808  | 0.7521136 | 4.26E-38  | 5.56E-04 |
| ProstateC | SES  | Combined | 0.674808  | 0.7639392 | 2.34E-82  | 5.56E-04 |
| ProstateC | Area | Combined | 0.7521136 | 0.7639392 | 2.04E-06  | 5.56E-04 |
| t1d       | Base | SIRE     | 0.6264655 | 0.6455917 | 5.87E-04  | 5.56E-04 |
| t1d       | Base | SES      | 0.6264655 | 0.6645067 | 5.82E-08  | 5.56E-04 |
| t1d       | Base | Area     | 0.6264655 | 0.6465102 | 1.03E-04  | 5.56E-04 |
| t1d       | Base | Combined | 0.6264655 | 0.6717248 | 3.21E-09  | 5.56E-04 |
| t1d       | SIRE | SES      | 0.6455917 | 0.6645067 | 0.0042207 | 5.56E-04 |
| t1d       | SIRE | Area     | 0.6455917 | 0.6465102 | 8.63E-01  | 5.56E-04 |
| t1d       | SIRE | Combined | 0.6455917 | 0.6717248 | 9.60E-05  | 5.56E-04 |
| t1d       | SES  | Area     | 0.6645067 | 0.6465102 | 6.68E-03  | 5.56E-04 |
| t1d       | SES  | Combined | 0.6645067 | 0.6717248 | 1.95E-03  | 5.56E-04 |
| t1d       | Area | Combined | 0.6465102 | 0.6717248 | 1.25E-05  | 5.56E-04 |
| t2d       | Base | SIRE     | 0.7085451 | 0.7583601 | 1.34E-212 | 5.56E-04 |
| t2d       | Base | SES      | 0.7085451 | 0.7717666 | 4.67E-284 | 5.56E-04 |
| t2d       | Base | Area     | 0.7085451 | 0.7302597 | 7.18E-78  | 5.56E-04 |
| t2d       | Base | Combined | 0.7085451 | 0.7745743 | 1.07E-301 | 5.56E-04 |
| t2d       | SIRE | SES      | 0.7583601 | 0.7717666 | 2.22E-16  | 5.56E-04 |
| t2d       | SIRE | Area     | 0.7583601 | 0.7302597 | 9.04E-77  | 5.56E-04 |



|     |      |          |           |           |           |          |
|-----|------|----------|-----------|-----------|-----------|----------|
| t2d | SIRE | Combined | 0.7583601 | 0.7745743 | 3.22E-24  | 5.56E-04 |
| t2d | SES  | Area     | 0.7717666 | 0.7302597 | 4.74E-130 | 5.56E-04 |
| t2d | SES  | Combined | 0.7717666 | 0.7745743 | 6.89E-09  | 5.56E-04 |
| t2d | Area | Combined | 0.7302597 | 0.7745743 | 7.92E-191 | 5.56E-04 |

p\_value\_bon significant

|           |       |
|-----------|-------|
| 3.79E-15  | TRUE  |
| 1.00E+00  | FALSE |
| 4.28E-15  | TRUE  |
| 2.04E-13  | TRUE  |
| 3.59E-16  | TRUE  |
| 1.00E+00  | FALSE |
| 1         | FALSE |
| 5.51E-14  | TRUE  |
| 5.29E-16  | TRUE  |
| 1.00E+00  | FALSE |
| 4.47E-06  | TRUE  |
| 1.93E-12  | TRUE  |
| 1.00E+00  | FALSE |
| 1         | FALSE |
| 1         | FALSE |
| 1.00E+00  | FALSE |
| 1.00E+00  | FALSE |
| 1.36E-04  | TRUE  |
| 7.64E-11  | TRUE  |
| 7.71E-03  | TRUE  |
| 1.06E-15  | TRUE  |
| 2.70E-03  | TRUE  |
| 1.00E+00  | FALSE |
| 3.25E-07  | TRUE  |
| 0.0016438 | TRUE  |
| 3.14E-03  | TRUE  |
| 1.10E-12  | TRUE  |
| 4.85E-07  | TRUE  |
| 1.25E-38  | TRUE  |
| 1.00E+00  | FALSE |
| 4.63E-09  | TRUE  |
| 1.32E-29  | TRUE  |
| 9.72E-07  | TRUE  |
| 1         | FALSE |
| 9.59E-38  | TRUE  |
| 7.51E-27  | TRUE  |
| 1.14E-11  | TRUE  |
| 2.70E-73  | TRUE  |
| 2.40E-60  | TRUE  |

|           |       |
|-----------|-------|
| 3.16E-29  | TRUE  |
| 6.62E-67  | TRUE  |
| 6.38E-06  | TRUE  |
| 6.88E-42  | TRUE  |
| 2.48E-05  | TRUE  |
| 1.14E-21  | TRUE  |
| 1         | FALSE |
| 1.47E-53  | TRUE  |
| 8.76E-05  | TRUE  |
| 1.95E-07  | TRUE  |
| 0.0016328 | TRUE  |
| 9.69E-05  | TRUE  |
| 4.30E-03  | TRUE  |
| 1         | FALSE |
| 1         | FALSE |
| 4.77E-01  | FALSE |
| 1.00E+00  | FALSE |
| 1.00E+00  | FALSE |
| 2.85E-04  | TRUE  |
| 2.77E-23  | TRUE  |
| 1.05E-102 | TRUE  |
| 1.46E-118 | TRUE  |
| 2.30E-08  | TRUE  |
| 1.32E-81  | TRUE  |
| 7.38E-90  | TRUE  |
| 3.83E-36  | TRUE  |
| 2.11E-80  | TRUE  |
| 1.84E-04  | TRUE  |
| 5.28E-02  | FALSE |
| 5.24E-06  | TRUE  |
| 9.25E-03  | TRUE  |
| 2.89E-07  | TRUE  |
| 0.3798627 | FALSE |
| 1.00E+00  | FALSE |
| 8.64E-03  | TRUE  |
| 6.01E-01  | FALSE |
| 1.76E-01  | FALSE |
| 1.12E-03  | TRUE  |
| 1.21E-210 | TRUE  |
| 4.20E-282 | TRUE  |
| 6.46E-76  | TRUE  |
| 9.66E-300 | TRUE  |
| 2.00E-14  | TRUE  |
| 8.14E-75  | TRUE  |

|           |      |
|-----------|------|
| 2.90E-22  | TRUE |
| 4.26E-128 | TRUE |
| 6.20E-07  | TRUE |
| 7.12E-189 | TRUE |

Supplementary Table 5 (S7): Stratified EN summary results in SES cohort. Reported values

| model    | Disease   | mean_train_ | sd_train_sco | mean_test_s | sd_test_scor | mean_AUC  |
|----------|-----------|-------------|--------------|-------------|--------------|-----------|
| Combined | Asthma    | 1.1001872   | 0.0039195    | 0.0786588   | 0.0104745    | 0.5184621 |
| Combined | Afib      | 0.9593086   | 0.0175737    | 0.0604375   | 0.0393904    | 0.5       |
| Combined | BreastC   | 0.3629505   | 0.0034351    | 0.0813292   | 0.0068049    | 0.5       |
| Combined | CKD       | 1.298328    | 0.0075729    | 0.0175434   | 0.0152661    | 0.5       |
| Combined | CHD       | 0.7015063   | 0.0023024    | 0.0525051   | 0.0101127    | 0.5       |
| Combined | HyperC    | 1.2337638   | 0.0051915    | 0.141063    | 0.0063466    | 0.5765492 |
| Combined | ProstateC | 1.2275307   | 0.0161195    | 0.3571362   | 0.0336725    | 0.7024294 |
| Combined | t2d       | 1.3760515   | 6.04E-04     | 0.0754377   | 0.0125567    | 0.5358667 |
| Combined | t1d       | 0.3879107   | 0.0124346    | 0.067151    | 0.0207839    | 0.5       |
| Combined | Asthma    | 1.0914594   | 0.0030173    | 0.1364843   | 0.0104806    | 0.5874956 |
| Combined | Afib      | 1.3013203   | 0.0025366    | 0.1474891   | 0.0083293    | 0.5923623 |
| Combined | BreastC   | 0.5494069   | 0.0038458    | 0.0920812   | 0.002607     | 0.5747531 |
| Combined | CKD       | 1.0535331   | 0.0057117    | 0.124931    | 0.0097873    | 0.5803166 |
| Combined | CHD       | 0.7750631   | 0.0013208    | 0.0934191   | 0.0049983    | 0.5520652 |
| Combined | HyperC    | 1.1629375   | 2.04E-03     | 0.1104364   | 0.0054606    | 0.5389439 |
| Combined | ProstateC | 1.1505171   | 0.0058789    | 0.3956257   | 0.0188356    | 0.7315657 |
| Combined | t2d       | 1.1349817   | 0.0019985    | 0.2145241   | 0.0045453    | 0.6421313 |
| Combined | t1d       | 0.2449898   | 0.0042249    | 0.0505757   | 0.004006     | 0.5       |
| Combined | Asthma    | 1.1012848   | 0.0061774    | 0.1768737   | 0.0158481    | 0.5938513 |
| Combined | Afib      | 0.8612913   | 0.0112665    | 0.1871727   | 0.0284868    | 0.568339  |
| Combined | BreastC   | 0.3643016   | 0.011053     | 0.0728727   | 0.0098614    | 0.5       |
| Combined | CKD       | 0.7862355   | 0.0059389    | 0.1381156   | 0.0150735    | 0.5417869 |
| Combined | CHD       | 0.6060171   | 0.0086854    | 0.0864684   | 0.015952     | 0.5550101 |
| Combined | HyperC    | 1.2131255   | 0.0058626    | 0.2434506   | 0.0139047    | 0.6402078 |
| Combined | ProstateC | 1.059582    | 0.0351857    | 0.4249506   | 0.0690721    | 0.759662  |
| Combined | t2d       | 1.2542357   | 0.0036658    | 0.306948    | 0.0105907    | 0.6789719 |
| Combined | t1d       | 0.2824672   | 0.0046621    | 0.0648678   | 0.0325297    | 0.5       |

include the mean and standard deviation of training scores (mean\_train\_score, sd\_train\_score)

| sd_AUC    | n_predictors | Predictors   | mean_coef     | sd_coef       | coef_nonzero  | Intercept  |
|-----------|--------------|--------------|---------------|---------------|---------------|------------|
| 0.0254622 | 8            | per_poverty_ | -0.849362,0.  | 0.197922,0.15 | 5,5,5,5,5,5   | -0.9704729 |
| 0         | 8            | per_poverty_ | 0.246461,0.   | 0.14963,0.1   | 4,4,3,4,4,5,5 | -1.6585648 |
| 0         | 8            | per_poverty_ | 1.37944,0.24  | 0.151232,0.15 | 5,2,2,2,1,2   | -3.1514338 |
| 0         | 3            | per_poverty_ | 0.855491,0.   | 0.151594,0.   | 5,2,5         | -0.6238364 |
| 0         | 8            | per_poverty_ | -0.359318,-0  | 0.168865,0.   | 5,5,5,5,5,4,2 | -1.154031  |
| 0.0070026 | 8            | per_poverty_ | 1.642872,-0.  | 0.235811,0.   | 5,5,2,5,5,5,2 | 0.7971525  |
| 0.0082708 | 8            | per_poverty_ | 0.986042,0.   | 0.430522,0.15 | 5,5,5,4,4,5   | -0.864004  |
| 0.0027857 | 8            | per_poverty_ | 0.05494,-0.2  | 0.070361,0.   | 4,5,5,5,4,5,5 | 0.3707231  |
| 0         | 8            | per_poverty_ | -1.091657,0.  | 0.39379,0.1   | 5,5,5,5,5,5,5 | -3.405913  |
| 0.0071781 | 8            | per_poverty_ | -0.10485,-0.  | 0.036231,0.   | 5,5,5,5,5,5,5 | -0.6165295 |
| 0.0082699 | 8            | per_poverty_ | -0.014963,0.  | 0.021187,0.   | 5,5,5,5,5,5,5 | -0.5708082 |
| 0.0019901 | 8            | per_poverty_ | 1.063222,0.10 | 0.036335,0.   | 5,5,5,5,5,5,4 | -2.3431885 |
| 0.0065699 | 8            | per_poverty_ | -0.75255,-0.  | 0.06157,0.0   | 5,5,5,5,5,5,5 | -0.5386227 |
| 0.0305517 | 8            | per_poverty_ | -0.11231,-0.  | 0.062176,0.   | 5,5,4,5,5,5,5 | -0.9448269 |
| 0.0225691 | 8            | per_poverty_ | 0.316282,-0.  | 0.043544,0.   | 5,5,5,3,5,5,5 | 1.3185815  |
| 0.0055376 | 8            | per_poverty_ | 1.934543,0.   | 0.096955,0.   | 5,5,5,5,5,5,5 | -1.3066424 |
| 0.0023776 | 8            | per_poverty_ | -1.569955,-0  | 0.020082,0.   | 5,5,5,5,5,2,5 | 0.2060401  |
| 0         | 8            | per_poverty_ | -1.129995,-0  | 0.155454,0.   | 5,5,5,5,4,3,3 | -2.8011427 |
| 0.0095013 | 8            | per_poverty_ | -0.182398,0.  | 0.163245,0.   | 5,4,5,5,3,5,5 | -0.5210261 |
| 0.062759  | 8            | per_poverty_ | 1.736356,-0.  | 0.160971,0.   | 5,5,5,3,5,5,5 | -1.994957  |
| 0         | 8            | per_poverty_ | 1.316217,-0.  | 0.214449,0.   | 5,5,5,2,5,4,5 | -2.7434082 |
| 0.0572364 | 8            | per_poverty_ | -1.121685,-0  | 0.381527,0.15 | 5,1,4,4,4,4   | -1.6134825 |
| 0.0503991 | 7            | per_poverty_ | 0.184784,-0.  | 0.239706,0.15 | 5,3,5,5,5,5   | -2.1058655 |
| 0.0018477 | 7            | per_poverty_ | 0.450285,-1.  | 0.151404,0.   | 5,5,5,5,5,3,5 | 1.1955002  |
| 0.0228074 | 8            | per_poverty_ | 1.803826,-1.  | 0.461361,0.2  | 5,5,5,5,5,5,5 | 0.1020752  |
| 0.0042682 | 8            | per_poverty_ | -1.111279,-1  | 0.129336,0.   | 5,5,5,5,5,5,5 | -0.5881872 |
| 0         | 7            | per_poverty_ | -0.931988,-0  | 0.545712,0.   | 5,5,4,3,1,1,5 | -4.3001098 |

full\_data\_cox SIRE

-0.970473,-0 NHB

-1.658565,0. NHB

-3.151434,1. NHB

-0.623836,0. NHB

-1.154031,-0 NHB

0.797152,1.5 NHB

-0.864004,1. NHB

0.370723,0,- NHB

-3.405913,-0 NHB

-0.616529,-0 NHW

-0.570808,-0 NHW

-2.343189,1. NHW

-0.538623,-0 NHW

-0.944827,-0 NHW

1.318582,0.3 NHW

-1.306642,1. NHW

0.20604,-1.5 NHW

-2.801143,-1 NHW

-0.521026,-0 HS

-1.994957,1. HS

-2.743408,1. HS

-1.613483,-1 HS

-2.105866,0. HS

1.1955,0.483 HS

0.102075,1.6 HS

-0.588187,-1 HS

-4.30011,-1.6 HS

Supplementary Table 5 (S8): Stratified logistic regression summary results in S

| Model    | Disease          | AUC       | AUC_CI_Lo | AUC_CI_Up | SIRE |
|----------|------------------|-----------|-----------|-----------|------|
| Base     | Asthma           | 0.6647862 | 0.6521743 | 0.677398  | NHB  |
| Combined | Asthma           | 0.6648991 | 0.6524276 | 0.6773706 | NHB  |
| Base     | Atrial Fibrillat | 0.6731076 | 0.6529293 | 0.6932859 | NHB  |
| Combined | Atrial Fibrillat | 0.6764206 | 0.6563325 | 0.6965087 | NHB  |
| Base     | Breast Canc      | 0.7399162 | 0.7219986 | 0.7578338 | NHB  |
| Combined | Breast Canc      | 0.7488504 | 0.7313341 | 0.7663668 | NHB  |
| Base     | Chronic Kidn     | 0.8632112 | 0.8540204 | 0.8724019 | NHB  |
| Combined | Chronic Kidn     | 0.8641547 | 0.8550026 | 0.8733068 | NHB  |
| Base     | Coronary He      | 0.762069  | 0.752262  | 0.7718761 | NHB  |
| Combined | Coronary He      | 0.7687088 | 0.7590467 | 0.7783709 | NHB  |
| Base     | Hypercholes      | 0.8334364 | 0.8218509 | 0.8450219 | NHB  |
| Combined | Hypercholes      | 0.838608  | 0.8272042 | 0.8500118 | NHB  |
| Base     | Prostate Car     | 0.7086393 | 0.6762295 | 0.7410492 | NHB  |
| Combined | Prostate Car     | 0.7982221 | 0.7700178 | 0.8264264 | NHB  |
| Base     | Type 2 Diabe     | 0.7498137 | 0.740199  | 0.7594283 | NHB  |
| Combined | Type 2 Diabe     | 0.7505529 | 0.7409498 | 0.7601561 | NHB  |
| Base     | Type 1 Diabe     | 0.6606918 | 0.623136  | 0.6982475 | NHB  |
| Combined | Type 1 Diabe     | 0.7027502 | 0.6679015 | 0.7375989 | NHB  |
| Base     | Asthma           | 0.6795104 | 0.6726143 | 0.6864064 | NHW  |
| Combined | Asthma           | 0.684242  | 0.677424  | 0.6910599 | NHW  |
| Base     | Atrial Fibrillat | 0.715348  | 0.7076837 | 0.7230122 | NHW  |
| Combined | Atrial Fibrillat | 0.7248466 | 0.7172986 | 0.7323945 | NHW  |
| Base     | Breast Canc      | 0.7160377 | 0.7089207 | 0.7231546 | NHW  |
| Combined | Breast Canc      | 0.7264773 | 0.7194976 | 0.7334569 | NHW  |
| Base     | Chronic Kidn     | 0.8843212 | 0.87975   | 0.8888924 | NHW  |
| Combined | Chronic Kidn     | 0.8889604 | 0.8845527 | 0.893368  | NHW  |
| Base     | Coronary He      | 0.8025211 | 0.798497  | 0.8065451 | NHW  |
| Combined | Coronary He      | 0.805382  | 0.8014193 | 0.8093447 | NHW  |
| Base     | Hypercholes      | 0.8390426 | 0.8333505 | 0.8447347 | NHW  |
| Combined | Hypercholes      | 0.842453  | 0.8368313 | 0.8480746 | NHW  |
| Base     | Prostate Car     | 0.6245738 | 0.6121193 | 0.6370282 | NHW  |
| Combined | Prostate Car     | 0.7702428 | 0.7595261 | 0.7809596 | NHW  |
| Base     | Type 2 Diabe     | 0.7244482 | 0.7193016 | 0.7295949 | NHW  |
| Combined | Type 2 Diabe     | 0.7651645 | 0.7604007 | 0.7699283 | NHW  |
| Base     | Type 1 Diabe     | 0.642054  | 0.6218029 | 0.6623052 | NHW  |
| Combined | Type 1 Diabe     | 0.670641  | 0.6519476 | 0.6893345 | NHW  |
| Base     | Asthma           | 0.669152  | 0.6539743 | 0.6843297 | HS   |
| Combined | Asthma           | 0.672777  | 0.6577992 | 0.6877547 | HS   |
| Base     | Atrial Fibrillat | 0.7275466 | 0.7023667 | 0.7527264 | HS   |
| Combined | Atrial Fibrillat | 0.7508585 | 0.727048  | 0.7746689 | HS   |
| Base     | Breast Canc      | 0.7531185 | 0.7333903 | 0.7728466 | HS   |
| Combined | Breast Canc      | 0.7683269 | 0.7490651 | 0.7875888 | HS   |



|          |              |           |           |           |    |
|----------|--------------|-----------|-----------|-----------|----|
| Base     | Chronic Kidn | 0.8500315 | 0.8351239 | 0.8649391 | HS |
| Combined | Chronic Kidn | 0.8578238 | 0.8434699 | 0.8721777 | HS |
| Base     | Coronary He  | 0.8155619 | 0.8047064 | 0.8264174 | HS |
| Combined | Coronary He  | 0.8202192 | 0.8094986 | 0.8309398 | HS |
| Base     | Hypercholes  | 0.878433  | 0.8665743 | 0.8902918 | HS |
| Combined | Hypercholes  | 0.8815379 | 0.8698969 | 0.8931789 | HS |
| Base     | Prostate Car | 0.7073307 | 0.6639297 | 0.7507316 | HS |
| Combined | Prostate Car | 0.8270907 | 0.7882465 | 0.8659349 | HS |
| Base     | Type 2 Diab  | 0.7879999 | 0.7775004 | 0.7984993 | HS |
| Combined | Type 2 Diab  | 0.8256307 | 0.8161122 | 0.8351492 | HS |
| Base     | Type 1 Diab  | 0.6115717 | 0.5593653 | 0.6637782 | HS |
| Combined | Type 1 Diab  | 0.6817686 | 0.634713  | 0.7288243 | HS |

Supplementary Table 5 (S9): AUC pair-wise comparisons of stratified results

| Disease   | Model1 | Model2   | AUC1      | AUC2      | p_value   | bonf_p    |
|-----------|--------|----------|-----------|-----------|-----------|-----------|
| Afib      | Base   | Combined | 0.6731076 | 0.6764206 | 0.2415911 | 0.0055556 |
| Asthma    | Base   | Combined | 0.6647862 | 0.6648991 | 0.9599455 | 0.0055556 |
| BreastC   | Base   | Combined | 0.7399162 | 0.7488504 | 5.33E-04  | 0.0055556 |
| CHD       | Base   | Combined | 0.762069  | 0.7687088 | 3.93E-06  | 0.0055556 |
| CKD       | Base   | Combined | 0.8632112 | 0.8641547 | 3.64E-02  | 0.0055556 |
| HyperC    | Base   | Combined | 0.8334364 | 0.838608  | 1.20E-04  | 0.0055556 |
| ProstateC | Base   | Combined | 0.7086393 | 0.7982221 | 1.59E-11  | 0.0055556 |
| t1d       | Base   | Combined | 0.6606918 | 0.7027502 | 9.19E-03  | 0.0055556 |
| t2d       | Base   | Combined | 0.7498137 | 0.7505529 | 4.18E-01  | 0.0055556 |
| Afib      | Base   | Combined | 0.715348  | 0.7248466 | 5.42E-15  | 0.0055556 |
| Asthma    | Base   | Combined | 0.6795104 | 0.684242  | 6.59E-03  | 0.0055556 |
| BreastC   | Base   | Combined | 0.7160377 | 0.7264773 | 1.86E-09  | 0.0055556 |
| CHD       | Base   | Combined | 0.8025211 | 0.805382  | 4.42E-15  | 0.0055556 |
| CKD       | Base   | Combined | 0.8843212 | 0.8889604 | 6.50E-20  | 0.0055556 |
| HyperC    | Base   | Combined | 0.8390426 | 0.842453  | 8.11E-09  | 0.0055556 |
| ProstateC | Base   | Combined | 0.6245738 | 0.7702428 | 4.07E-109 | 0.0055556 |
| t1d       | Base   | Combined | 0.642054  | 0.670641  | 2.88E-05  | 0.0055556 |
| t2d       | Base   | Combined | 0.7244482 | 0.7651645 | 2.42E-111 | 0.0055556 |
| Afib      | Base   | Combined | 0.7275466 | 0.7508585 | 1.30E-04  | 0.0055556 |
| Asthma    | Base   | Combined | 0.669152  | 0.672777  | 3.91E-01  | 0.0055556 |
| BreastC   | Base   | Combined | 0.7531185 | 0.7683269 | 1.19E-03  | 0.0055556 |
| CHD       | Base   | Combined | 0.8155619 | 0.8202192 | 1.17E-04  | 0.0055556 |
| CKD       | Base   | Combined | 0.8500315 | 0.8578238 | 3.05E-05  | 0.0055556 |
| HyperC    | Base   | Combined | 0.878433  | 0.8815379 | 0.0102067 | 0.0055556 |
| ProstateC | Base   | Combined | 0.7073307 | 0.8270907 | 4.43E-08  | 0.0055556 |
| t1d       | Base   | Combined | 0.6115717 | 0.6817686 | 4.92E-03  | 0.0055556 |
| t2d       | Base   | Combined | 0.7879999 | 0.8256307 | 2.02E-33  | 0.0055556 |

| p_value   | bon significant | SIRE |
|-----------|-----------------|------|
| 1         | FALSE           | NHB  |
| 1         | FALSE           | NHB  |
| 0.0048004 | TRUE            | NHB  |
| 3.54E-05  | TRUE            | NHB  |
| 3.27E-01  | FALSE           | NHB  |
| 0.0010785 | TRUE            | NHB  |
| 1.43E-10  | TRUE            | NHB  |
| 8.27E-02  | FALSE           | NHB  |
| 1         | FALSE           | NHB  |
| 4.88E-14  | TRUE            | NHW  |
| 5.94E-02  | FALSE           | NHW  |
| 1.67E-08  | TRUE            | NHW  |
| 3.98E-14  | TRUE            | NHW  |
| 5.85E-19  | TRUE            | NHW  |
| 7.30E-08  | TRUE            | NHW  |
| 3.66E-108 | TRUE            | NHW  |
| 2.59E-04  | TRUE            | NHW  |
| 2.18E-110 | TRUE            | NHW  |
| 1.17E-03  | TRUE            | HS   |
| 1.00E+00  | FALSE           | HS   |
| 1.07E-02  | TRUE            | HS   |
| 1.05E-03  | TRUE            | HS   |
| 2.74E-04  | TRUE            | HS   |
| 0.0918605 | FALSE           | HS   |
| 3.98E-07  | TRUE            | HS   |
| 4.43E-02  | TRUE            | HS   |
| 1.82E-32  | TRUE            | HS   |
