# Supplementary material for: Practical Considerations for using Social Determinants of Health for Disease Prediction in All of Us
Source: Research Square preprint supplement (doi:10.21203/rs.3.rs-8428004/v1), 2026-01-13
Supplement: Supplementary file 2 [file 65630c07e1bfcb2514fa36e8.xlsx]

## Sheet: S1
Supplementary Table 6 (S1): PheWAS results in Individual Cohort across 13 predictors
phecode	description	groupnum	group	color	cases	control	p_value	beta_ind	conf_int_1	conf_int_2	converged	code_val	neg_p_log_10	Domain	sig	number_of_associations
250	Diabetes mellitus	3	endocrine/metabolic	brown	8051	29511	3.3e-165	2.10606	1.955	2.257	TRUE	250	164.481	SDOH	YES	13
250.2	Type 2 diabetes	3	endocrine/metabolic	brown	7910	29511	4.23e-168	2.14042	1.989	2.292	TRUE	250.2	167.374	SDOH	YES	13
250.22	Type 2 diabetes with renal manifestations	3	endocrine/metabolic	brown	1371	29511	3.79e-57	2.55616	2.242	2.871	TRUE	250.22	56.4209	SDOH	YES	13
250.23	Type 2 diabetes with ophthalmic manifestations	3	endocrine/metabolic	brown	741	29511	3.44e-33	2.505	2.096	2.914	TRUE	250.23	32.4636	SDOH	YES	13
250.24	Type 2 diabetes with neurological manifestations	3	endocrine/metabolic	brown	1924	29511	5.28e-75	2.56952	2.295	2.844	TRUE	250.24	74.2772	SDOH	YES	13
250.6	Polyneuropathy in diabetes	3	endocrine/metabolic	brown	1177	29511	7.88e-43	2.40452	2.061	2.748	TRUE	250.6	42.1034	SDOH	YES	13
261	Vitamin deficiency	3	endocrine/metabolic	brown	11468	30089	3.97e-11	0.455981	0.321	0.591	TRUE	261	10.4009	SDOH	YES	13
261.4	Vitamin D deficiency	3	endocrine/metabolic	brown	9806	30089	1.77e-10	0.464085	0.322	0.607	TRUE	261.4	9.75168	SDOH	YES	13
278	Overweight, obesity and other hyperalimentation	3	endocrine/metabolic	brown	13189	30856	1.91e-152	1.68185	1.557	1.807	TRUE	278	151.719	SDOH	YES	13
278.1	Obesity	3	endocrine/metabolic	brown	13038	30856	3.08e-154	1.69663	1.571	1.822	TRUE	278.1	153.512	SDOH	YES	13
278.11	Morbid obesity	3	endocrine/metabolic	brown	5364	30856	1.35e-143	2.19034	2.022	2.359	TRUE	278.11	142.869	SDOH	YES	13
401	Hypertension	8	circulatory system	red	21535	23181	4.96e-155	1.80045	1.667	1.933	TRUE	401	154.305	SDOH	YES	13
401.1	Essential hypertension	8	circulatory system	red	21310	23181	1.54e-153	1.79847	1.665	1.932	TRUE	401.1	152.814	SDOH	YES	13
401.2	Hypertensive heart and/or renal disease	8	circulatory system	red	2625	23181	4.42e-91	2.87008	2.592	3.148	TRUE	401.2	90.3542	SDOH	YES	13
401.21	Hypertensive heart disease	8	circulatory system	red	1060	23181	7.02e-55	3.11736	2.726	3.509	TRUE	401.21	54.1539	SDOH	YES	13
401.22	Hypertensive chronic kidney disease	8	circulatory system	red	1567	23181	8.41e-53	2.64013	2.302	2.978	TRUE	401.22	52.0754	SDOH	YES	13
428	Congestive heart failure; nonhypertensive	8	circulatory system	red	2218	39320	1.58e-43	1.7717	1.521	2.023	TRUE	428	42.8021	SDOH	YES	13
428.1	Congestive heart failure (CHF) NOS	8	circulatory system	red	1382	39320	2.56e-30	1.81146	1.501	2.122	TRUE	428.1	29.5911	SDOH	YES	13
512.7	Shortness of breath	9	respiratory	coral4	8247	21607	8.54e-64	1.50834	1.333	1.684	TRUE	512.7	63.0688	SDOH	YES	13
585	Renal failure	11	genitourinary	black	4076	36480	1.04e-43	1.43148	1.229	1.634	TRUE	585	42.9847	SDOH	YES	13
585.1	Acute renal failure	11	genitourinary	black	1792	36480	8.47e-40	1.87919	1.6	2.158	TRUE	585.1	39.0723	SDOH	YES	13
585.3	Chronic renal failure [CKD]	11	genitourinary	black	2719	36480	1.24e-23	1.25019	1.006	1.495	TRUE	585.3	22.9071	SDOH	YES	13
250	Diabetes mellitus	3	endocrine/metabolic	brown	8051	29511	3.32e-63	1.77948	1.572	1.987	TRUE	250	62.4787	SCC	YES	13
250.2	Type 2 diabetes	3	endocrine/metabolic	brown	7910	29511	1.8e-65	1.82745	1.618	2.037	TRUE	250.2	64.745	SCC	YES	13
250.22	Type 2 diabetes with renal manifestations	3	endocrine/metabolic	brown	1371	29511	7.73e-13	1.68801	1.226	2.15	TRUE	250.22	12.1119	SCC	YES	13
250.23	Type 2 diabetes with ophthalmic manifestations	3	endocrine/metabolic	brown	741	29511	3.06e-06	1.4531	0.843	2.063	TRUE	250.23	5.51439	SCC	YES	13
250.24	Type 2 diabetes with neurological manifestations	3	endocrine/metabolic	brown	1924	29511	1.46e-43	2.74363	2.355	3.132	TRUE	250.24	42.8357	SCC	YES	13
250.6	Polyneuropathy in diabetes	3	endocrine/metabolic	brown	1177	29511	1.14e-23	2.47962	1.995	2.964	TRUE	250.6	22.9432	SCC	YES	13
261	Vitamin deficiency	3	endocrine/metabolic	brown	11468	30089	1.59e-26	0.973337	0.794	1.152	TRUE	261	25.7984	SCC	YES	13
261.4	Vitamin D deficiency	3	endocrine/metabolic	brown	9806	30089	6.05e-24	0.973139	0.784	1.162	TRUE	261.4	23.2182	SCC	YES	13
278	Overweight, obesity and other hyperalimentation	3	endocrine/metabolic	brown	13189	30856	2.13e-118	1.97819	1.811	2.146	TRUE	278	117.672	SCC	YES	13
278.1	Obesity	3	endocrine/metabolic	brown	13038	30856	1.36e-119	1.99521	1.827	2.163	TRUE	278.1	118.866	SCC	YES	13
278.11	Morbid obesity	3	endocrine/metabolic	brown	5364	30856	2.23e-126	2.81714	2.586	3.048	TRUE	278.11	125.652	SCC	YES	13
401	Hypertension	8	circulatory system	red	21535	23181	1e-62	1.46691	1.295	1.639	TRUE	401	61.9986	SCC	YES	13
401.1	Essential hypertension	8	circulatory system	red	21310	23181	1.38e-61	1.45835	1.286	1.631	TRUE	401.1	60.8603	SCC	YES	13
401.2	Hypertensive heart and/or renal disease	8	circulatory system	red	2625	23181	6.19e-26	2.08196	1.694	2.469	TRUE	401.2	25.2084	SCC	YES	13
401.21	Hypertensive heart disease	8	circulatory system	red	1060	23181	1.34e-17	2.41323	1.859	2.967	TRUE	401.21	16.8731	SCC	YES	13
401.22	Hypertensive chronic kidney disease	8	circulatory system	red	1567	23181	5.52e-11	1.60754	1.127	2.088	TRUE	401.22	10.2583	SCC	YES	13
428	Congestive heart failure; nonhypertensive	8	circulatory system	red	2218	39320	1.54e-09	1.12119	0.757	1.485	TRUE	428	8.81241	SCC	YES	13
428.1	Congestive heart failure (CHF) NOS	8	circulatory system	red	1382	39320	5.8e-06	1.05178	0.597	1.506	TRUE	428.1	5.23682	SCC	YES	13
512.7	Shortness of breath	9	respiratory	coral4	8247	21607	2.01e-59	1.9798	1.741	2.218	TRUE	512.7	58.6973	SCC	YES	13
585	Renal failure	11	genitourinary	black	4076	36480	1.05e-22	1.39629	1.117	1.675	TRUE	585	21.9782	SCC	YES	13
585.1	Acute renal failure	11	genitourinary	black	1792	36480	1.35e-15	1.60572	1.212	2	TRUE	585.1	14.8696	SCC	YES	13
585.3	Chronic renal failure [CKD]	11	genitourinary	black	2719	36480	1.8e-11	1.16367	0.824	1.503	TRUE	585.3	10.7457	SCC	YES	13
250	Diabetes mellitus	3	endocrine/metabolic	brown	8051	29511	1.03e-65	1.44159	1.277	1.607	TRUE	250	64.9892	NBD	YES	13
250.2	Type 2 diabetes	3	endocrine/metabolic	brown	7910	29511	5.01e-69	1.48954	1.323	1.656	TRUE	250.2	68.3002	NBD	YES	13
250.22	Type 2 diabetes with renal manifestations	3	endocrine/metabolic	brown	1371	29511	7.44e-23	1.7847	1.429	2.14	TRUE	250.22	22.1282	NBD	YES	13
250.23	Type 2 diabetes with ophthalmic manifestations	3	endocrine/metabolic	brown	741	29511	4.32e-30	2.56055	2.12	3.001	TRUE	250.23	29.3644	NBD	YES	13
250.24	Type 2 diabetes with neurological manifestations	3	endocrine/metabolic	brown	1924	29511	3.7e-37	1.97018	1.667	2.273	TRUE	250.24	36.4323	NBD	YES	13
250.6	Polyneuropathy in diabetes	3	endocrine/metabolic	brown	1177	29511	3.61e-24	1.94131	1.566	2.316	TRUE	250.6	23.4421	NBD	YES	13
261	Vitamin deficiency	3	endocrine/metabolic	brown	11468	30089	3.16e-10	0.46156	0.318	0.605	TRUE	261	9.50076	NBD	YES	13
261.4	Vitamin D deficiency	3	endocrine/metabolic	brown	9806	30089	8.23e-11	0.501669	0.35	0.653	TRUE	261.4	10.0846	NBD	YES	13
278	Overweight, obesity and other hyperalimentation	3	endocrine/metabolic	brown	13189	30856	1.31e-72	1.22787	1.094	1.361	TRUE	278	71.8838	NBD	YES	13
278.1	Obesity	3	endocrine/metabolic	brown	13038	30856	9.35e-74	1.24178	1.108	1.376	TRUE	278.1	73.0294	NBD	YES	13
278.11	Morbid obesity	3	endocrine/metabolic	brown	5364	30856	3.5e-67	1.61112	1.429	1.793	TRUE	278.11	66.4555	NBD	YES	13
401	Hypertension	8	circulatory system	red	21535	23181	2.35e-56	1.12942	0.989	1.269	TRUE	401	55.6284	NBD	YES	13
401.1	Essential hypertension	8	circulatory system	red	21310	23181	3.8e-55	1.12094	0.98	1.261	TRUE	401.1	54.4203	NBD	YES	13
401.2	Hypertensive heart and/or renal disease	8	circulatory system	red	2625	23181	3.48e-45	2.15791	1.858	2.458	TRUE	401.2	44.4589	NBD	YES	13
401.21	Hypertensive heart disease	8	circulatory system	red	1060	23181	1.7e-19	1.96397	1.538	2.39	TRUE	401.21	18.7704	NBD	YES	13
401.22	Hypertensive chronic kidney disease	8	circulatory system	red	1567	23181	9.7e-29	2.06566	1.702	2.43	TRUE	401.22	28.0132	NBD	YES	13
428	Congestive heart failure; nonhypertensive	8	circulatory system	red	2218	39320	1.64e-12	1.02692	0.742	1.312	TRUE	428	11.785	NBD	YES	13
428.1	Congestive heart failure (CHF) NOS	8	circulatory system	red	1382	39320	1.32e-13	1.30785	0.962	1.654	TRUE	428.1	12.8804	NBD	YES	13
512.7	Shortness of breath	9	respiratory	coral4	8247	21607	1.58e-24	0.998187	0.807	1.19	TRUE	512.7	23.8001	NBD	YES	13
585	Renal failure	11	genitourinary	black	4076	36480	4.15e-23	1.11708	0.896	1.338	TRUE	585	22.3819	NBD	YES	13
585.1	Acute renal failure	11	genitourinary	black	1792	36480	2.29e-21	1.47654	1.172	1.781	TRUE	585.1	20.6402	NBD	YES	13
585.3	Chronic renal failure [CKD]	11	genitourinary	black	2719	36480	1.14e-13	1.01113	0.744	1.278	TRUE	585.3	12.9422	NBD	YES	13
250	Diabetes mellitus	3	endocrine/metabolic	brown	8051	29511	1.3e-238	2.55508	2.403	2.707	TRUE	250	237.887	ES	YES	13
250.2	Type 2 diabetes	3	endocrine/metabolic	brown	7910	29511	1.27e-245	2.61481	2.462	2.768	TRUE	250.2	244.895	ES	YES	13
250.22	Type 2 diabetes with renal manifestations	3	endocrine/metabolic	brown	1371	29511	2.16e-85	3.15683	2.841	3.473	TRUE	250.22	84.6662	ES	YES	13
250.23	Type 2 diabetes with ophthalmic manifestations	3	endocrine/metabolic	brown	741	29511	2.16e-55	3.21192	2.81	3.613	TRUE	250.23	54.6654	ES	YES	13
250.24	Type 2 diabetes with neurological manifestations	3	endocrine/metabolic	brown	1924	29511	7.06e-150	3.59374	3.324	3.864	TRUE	250.24	149.151	ES	YES	13
250.6	Polyneuropathy in diabetes	3	endocrine/metabolic	brown	1177	29511	7.31e-93	3.44944	3.119	3.78	TRUE	250.6	92.1361	ES	YES	13
261	Vitamin deficiency	3	endocrine/metabolic	brown	11468	30089	2.09e-21	0.651484	0.517	0.786	TRUE	261	20.68	ES	YES	13
261.4	Vitamin D deficiency	3	endocrine/metabolic	brown	9806	30089	3.12e-18	0.630361	0.488	0.772	TRUE	261.4	17.5057	ES	YES	13
278	Overweight, obesity and other hyperalimentation	3	endocrine/metabolic	brown	13189	30856	1.49e-246	2.12958	2.005	2.254	TRUE	278	245.826	ES	YES	13
278.1	Obesity	3	endocrine/metabolic	brown	13038	30856	1.21e-249	2.14917	2.024	2.274	TRUE	278.1	248.917	ES	YES	13
278.11	Morbid obesity	3	endocrine/metabolic	brown	5364	30856	2.84e-240	2.72566	2.564	2.887	TRUE	278.11	239.547	ES	YES	13
401	Hypertension	8	circulatory system	red	21535	23181	4.9e-216	2.1363	2.003	2.27	TRUE	401	215.31	ES	YES	13
401.1	Essential hypertension	8	circulatory system	red	21310	23181	8.27e-212	2.12285	1.989	2.257	TRUE	401.1	211.083	ES	YES	13
401.2	Hypertensive heart and/or renal disease	8	circulatory system	red	2625	23181	3.65e-142	3.70423	3.418	3.99	TRUE	401.2	141.438	ES	YES	13
401.21	Hypertensive heart disease	8	circulatory system	red	1060	23181	5.81e-82	3.89676	3.498	4.295	TRUE	401.21	81.2357	ES	YES	13
401.22	Hypertensive chronic kidney disease	8	circulatory system	red	1567	23181	1.65e-77	3.2941	2.948	3.641	TRUE	401.22	76.7821	ES	YES	13
428	Congestive heart failure; nonhypertensive	8	circulatory system	red	2218	39320	2.04e-78	2.41621	2.164	2.669	TRUE	428	77.6913	ES	YES	13
428.1	Congestive heart failure (CHF) NOS	8	circulatory system	red	1382	39320	5.47e-62	2.59792	2.291	2.904	TRUE	428.1	61.2621	ES	YES	13
512.7	Shortness of breath	9	respiratory	coral4	8247	21607	8.72e-102	1.92358	1.748	2.1	TRUE	512.7	101.059	ES	YES	13
585	Renal failure	11	genitourinary	black	4076	36480	2.44e-88	2.07298	1.869	2.277	TRUE	585	87.613	ES	YES	13
585.1	Acute renal failure	11	genitourinary	black	1792	36480	1.28e-73	2.53268	2.259	2.806	TRUE	585.1	72.8926	ES	YES	13
585.3	Chronic renal failure [CKD]	11	genitourinary	black	2719	36480	6.37e-54	1.95904	1.711	2.207	TRUE	585.3	53.1956	ES	YES	13
250	Diabetes mellitus	3	endocrine/metabolic	brown	8051	29511	4.5e-105	2.20486	2.006	2.403	TRUE	250	104.347	HCAU	YES	13
250.2	Type 2 diabetes	3	endocrine/metabolic	brown	7910	29511	6.87e-108	2.25461	2.054	2.455	TRUE	250.2	107.163	HCAU	YES	13
250.22	Type 2 diabetes with renal manifestations	3	endocrine/metabolic	brown	1371	29511	1.03e-34	2.73723	2.301	3.174	TRUE	250.22	33.9878	HCAU	YES	13
250.23	Type 2 diabetes with ophthalmic manifestations	3	endocrine/metabolic	brown	741	29511	6.85e-13	2.11761	1.54	2.695	TRUE	250.23	12.1645	HCAU	YES	13
250.24	Type 2 diabetes with neurological manifestations	3	endocrine/metabolic	brown	1924	29511	7.07e-67	3.27209	2.901	3.643	TRUE	250.24	66.1505	HCAU	YES	13
250.6	Polyneuropathy in diabetes	3	endocrine/metabolic	brown	1177	29511	5.43e-45	3.30604	2.846	3.766	TRUE	250.6	44.265	HCAU	YES	13
261	Vitamin deficiency	3	endocrine/metabolic	brown	11468	30089	2.09e-29	0.969248	0.801	1.138	TRUE	261	28.6809	HCAU	YES	13
261.4	Vitamin D deficiency	3	endocrine/metabolic	brown	9806	30089	1.31e-26	0.970294	0.792	1.148	TRUE	261.4	25.8824	HCAU	YES	13
278	Overweight, obesity and other hyperalimentation	3	endocrine/metabolic	brown	13189	30856	1.81e-122	1.89124	1.734	2.049	TRUE	278	121.743	HCAU	YES	13
278.1	Obesity	3	endocrine/metabolic	brown	13038	30856	5.18e-123	1.90222	1.744	2.06	TRUE	278.1	122.286	HCAU	YES	13
278.11	Morbid obesity	3	endocrine/metabolic	brown	5364	30856	2.89e-129	2.65605	2.441	2.871	TRUE	278.11	128.539	HCAU	YES	13
401	Hypertension	8	circulatory system	red	21535	23181	2.83e-85	1.63541	1.472	1.799	TRUE	401	84.5483	HCAU	YES	13
401.1	Essential hypertension	8	circulatory system	red	21310	23181	1.37e-83	1.62583	1.461	1.79	TRUE	401.1	82.8645	HCAU	YES	13
401.2	Hypertensive heart and/or renal disease	8	circulatory system	red	2625	23181	3.48e-42	2.60636	2.231	2.982	TRUE	401.2	41.459	HCAU	YES	13
401.21	Hypertensive heart disease	8	circulatory system	red	1060	23181	2.16e-28	3.01035	2.476	3.544	TRUE	401.21	27.6654	HCAU	YES	13
401.22	Hypertensive chronic kidney disease	8	circulatory system	red	1567	23181	3.46e-22	2.27761	1.817	2.738	TRUE	401.22	21.4607	HCAU	YES	13
428	Congestive heart failure; nonhypertensive	8	circulatory system	red	2218	39320	1.61e-30	2.02352	1.678	2.369	TRUE	428	29.7926	HCAU	YES	13
428.1	Congestive heart failure (CHF) NOS	8	circulatory system	red	1382	39320	7.93e-20	1.99764	1.568	2.427	TRUE	428.1	19.101	HCAU	YES	13
512.7	Shortness of breath	9	respiratory	coral4	8247	21607	9.91e-104	2.48435	2.259	2.709	TRUE	512.7	103.004	HCAU	YES	13
585	Renal failure	11	genitourinary	black	4076	36480	3.38e-28	1.52912	1.257	1.801	TRUE	585	27.4714	HCAU	YES	13
585.1	Acute renal failure	11	genitourinary	black	1792	36480	1.55e-20	1.81271	1.43	2.195	TRUE	585.1	19.8098	HCAU	YES	13
585.3	Chronic renal failure [CKD]	11	genitourinary	black	2719	36480	1.96e-19	1.5155	1.186	1.845	TRUE	585.3	18.7083	HCAU	YES	13
250	Diabetes mellitus	3	endocrine/metabolic	brown	8051	28783	3.57e-231	1.67459	1.573	1.776	TRUE	250	230.447	education	YES	13
250.2	Type 2 diabetes	3	endocrine/metabolic	brown	7910	28783	8.18e-234	1.69809	1.596	1.8	TRUE	250.2	233.087	education	YES	13
250.22	Type 2 diabetes with renal manifestations	3	endocrine/metabolic	brown	1371	28783	7.83e-85	2.142	1.927	2.357	TRUE	250.22	84.1062	education	YES	13
250.23	Type 2 diabetes with ophthalmic manifestations	3	endocrine/metabolic	brown	741	28783	3.06e-48	2.09613	1.815	2.378	TRUE	250.23	47.514	education	YES	13
250.24	Type 2 diabetes with neurological manifestations	3	endocrine/metabolic	brown	1924	28783	2.9e-112	2.16475	1.976	2.353	TRUE	250.24	111.538	education	YES	13
250.6	Polyneuropathy in diabetes	3	endocrine/metabolic	brown	1177	28783	9.24e-64	2.00734	1.774	2.241	TRUE	250.6	63.0342	education	YES	13
261	Vitamin deficiency	3	endocrine/metabolic	brown	11468	29361	1.54e-09	0.269383	0.182	0.357	TRUE	261	8.8113	education	YES	13
261.4	Vitamin D deficiency	3	endocrine/metabolic	brown	9806	29361	1.42e-09	0.284985	0.193	0.377	TRUE	261.4	8.84814	education	YES	13
278	Overweight, obesity and other hyperalimentation	3	endocrine/metabolic	brown	13189	30128	2.19e-244	1.40681	1.324	1.489	TRUE	278	243.659	education	YES	13
278.1	Obesity	3	endocrine/metabolic	brown	13038	30128	2.76e-246	1.41725	1.334	1.5	TRUE	278.1	245.559	education	YES	13
278.11	Morbid obesity	3	endocrine/metabolic	brown	5364	30128	5.49e-198	1.7537	1.639	1.868	TRUE	278.11	197.26	education	YES	13
401	Hypertension	8	circulatory system	red	21535	22453	1.93e-228	1.41984	1.334	1.506	TRUE	401	227.714	education	YES	13
401.1	Essential hypertension	8	circulatory system	red	21310	22453	8.33e-227	1.41976	1.333	1.506	TRUE	401.1	226.079	education	YES	13
401.2	Hypertensive heart and/or renal disease	8	circulatory system	red	2625	22453	1.01e-117	2.19555	2.009	2.382	TRUE	401.2	116.996	education	YES	13
401.21	Hypertensive heart disease	8	circulatory system	red	1060	22453	5.54e-61	2.2349	1.969	2.501	TRUE	401.21	60.2561	education	YES	13
401.22	Hypertensive chronic kidney disease	8	circulatory system	red	1567	22453	3.75e-75	2.11461	1.889	2.341	TRUE	401.22	74.4265	education	YES	13
428	Congestive heart failure; nonhypertensive	8	circulatory system	red	2218	38592	2.69e-50	1.27788	1.11	1.446	TRUE	428	49.5699	education	YES	13
428.1	Congestive heart failure (CHF) NOS	8	circulatory system	red	1382	38592	1.41e-34	1.30685	1.098	1.516	TRUE	428.1	33.8515	education	YES	13
512.7	Shortness of breath	9	respiratory	coral4	8247	20879	6.55e-73	1.05751	0.943	1.172	TRUE	512.7	72.1835	education	YES	13
585	Renal failure	11	genitourinary	black	4076	35752	1.52e-58	1.08914	0.957	1.221	TRUE	585	57.818	education	YES	13
585.1	Acute renal failure	11	genitourinary	black	1792	35752	9.27e-49	1.41165	1.223	1.6	TRUE	585.1	48.0327	education	YES	13
585.3	Chronic renal failure [CKD]	11	genitourinary	black	2719	35752	1.44e-33	0.97465	0.816	1.133	TRUE	585.3	32.8404	education	YES	13
250	Diabetes mellitus	3	endocrine/metabolic	brown	8051	29511	1.31e-78	1.92215	1.721	2.123	TRUE	250	77.8839	median_income_subset	YES	13
250.2	Type 2 diabetes	3	endocrine/metabolic	brown	7910	29511	9.99e-81	1.97088	1.768	2.174	TRUE	250.2	80.0003	median_income_subset	YES	13
250.22	Type 2 diabetes with renal manifestations	3	endocrine/metabolic	brown	1371	29511	1.43e-23	2.24909	1.809	2.69	TRUE	250.22	22.8438	median_income_subset	YES	13
250.23	Type 2 diabetes with ophthalmic manifestations	3	endocrine/metabolic	brown	741	29511	3.93e-13	2.15487	1.573	2.737	TRUE	250.23	12.4052	median_income_subset	YES	13
250.24	Type 2 diabetes with neurological manifestations	3	endocrine/metabolic	brown	1924	29511	1.58e-41	2.73459	2.338	3.132	TRUE	250.24	40.8007	median_income_subset	YES	13
250.6	Polyneuropathy in diabetes	3	endocrine/metabolic	brown	1177	29511	2.82e-29	2.87627	2.374	3.378	TRUE	250.6	28.5501	median_income_subset	YES	13
261	Vitamin deficiency	3	endocrine/metabolic	brown	11468	30089	8.51e-33	1.00672	0.841	1.172	TRUE	261	32.0701	median_income_subset	YES	13
261.4	Vitamin D deficiency	3	endocrine/metabolic	brown	9806	30089	5.54e-28	0.978629	0.804	1.154	TRUE	261.4	27.2563	median_income_subset	YES	13
278	Overweight, obesity and other hyperalimentation	3	endocrine/metabolic	brown	13189	30856	1.25e-102	1.77602	1.614	1.938	TRUE	278	101.904	median_income_subset	YES	13
278.1	Obesity	3	endocrine/metabolic	brown	13038	30856	1.46e-102	1.78297	1.62	1.945	TRUE	278.1	101.836	median_income_subset	YES	13
278.11	Morbid obesity	3	endocrine/metabolic	brown	5364	30856	1.76e-72	2.234	1.991	2.477	TRUE	278.11	71.7539	median_income_subset	YES	13
401	Hypertension	8	circulatory system	red	21535	23181	1.33e-87	1.56002	1.406	1.714	TRUE	401	86.8752	median_income_subset	YES	13
401.1	Essential hypertension	8	circulatory system	red	21310	23181	2.03e-86	1.55437	1.4	1.709	TRUE	401.1	85.6932	median_income_subset	YES	13
401.2	Hypertensive heart and/or renal disease	8	circulatory system	red	2625	23181	3.67e-43	2.61134	2.24	2.983	TRUE	401.2	42.4348	median_income_subset	YES	13
401.21	Hypertensive heart disease	8	circulatory system	red	1060	23181	1.82e-20	2.55713	2.017	3.098	TRUE	401.21	19.7402	median_income_subset	YES	13
401.22	Hypertensive chronic kidney disease	8	circulatory system	red	1567	23181	2.32e-26	2.47396	2.018	2.93	TRUE	401.22	25.6337	median_income_subset	YES	13
428	Congestive heart failure; nonhypertensive	8	circulatory system	red	2218	39320	1.18e-13	1.22311	0.9	1.546	TRUE	428	12.9289	median_income_subset	YES	13
428.1	Congestive heart failure (CHF) NOS	8	circulatory system	red	1382	39320	4.11e-09	1.20041	0.8	1.601	TRUE	428.1	8.3858	median_income_subset	YES	13
512.7	Shortness of breath	9	respiratory	coral4	8247	21607	6.75e-27	1.18726	0.971	1.404	TRUE	512.7	26.1704	median_income_subset	YES	13
585	Renal failure	11	genitourinary	black	4076	36480	1.62e-31	1.53028	1.273	1.787	TRUE	585	30.7901	median_income_subset	YES	13
585.1	Acute renal failure	11	genitourinary	black	1792	36480	1.32e-18	1.69112	1.315	2.068	TRUE	585.1	17.8797	median_income_subset	YES	13
585.3	Chronic renal failure [CKD]	11	genitourinary	black	2719	36480	3.75e-23	1.55197	1.245	1.859	TRUE	585.3	22.4259	median_income_subset	YES	13
250	Diabetes mellitus	3	endocrine/metabolic	brown	8051	29511	7.37e-58	1.67458	1.47	1.879	TRUE	250	57.1324	high_school_education_subset	YES	13
250.2	Type 2 diabetes	3	endocrine/metabolic	brown	7910	29511	4.07e-60	1.72129	1.515	1.928	TRUE	250.2	59.3899	high_school_education_subset	YES	13
250.22	Type 2 diabetes with renal manifestations	3	endocrine/metabolic	brown	1371	29511	2.5e-13	1.60277	1.174	2.032	TRUE	250.22	12.6024	high_school_education_subset	YES	13
250.23	Type 2 diabetes with ophthalmic manifestations	3	endocrine/metabolic	brown	741	29511	4.21e-23	2.66554	2.138	3.193	TRUE	250.23	22.3761	high_school_education_subset	YES	13
250.24	Type 2 diabetes with neurological manifestations	3	endocrine/metabolic	brown	1924	29511	1.69e-15	1.52227	1.148	1.897	TRUE	250.24	14.7708	high_school_education_subset	YES	13
250.6	Polyneuropathy in diabetes	3	endocrine/metabolic	brown	1177	29511	8.15e-09	1.36608	0.902	1.83	TRUE	250.6	8.08891	high_school_education_subset	YES	13
261	Vitamin deficiency	3	endocrine/metabolic	brown	11468	30089	5.82e-07	0.459859	0.279	0.64	TRUE	261	6.23481	high_school_education_subset	YES	13
261.4	Vitamin D deficiency	3	endocrine/metabolic	brown	9806	30089	2.39e-08	0.541533	0.351	0.732	TRUE	261.4	7.62242	high_school_education_subset	YES	13
278	Overweight, obesity and other hyperalimentation	3	endocrine/metabolic	brown	13189	30856	1.3e-43	1.17729	1.011	1.344	TRUE	278	42.8853	high_school_education_subset	YES	13
278.1	Obesity	3	endocrine/metabolic	brown	13038	30856	1.06e-43	1.18226	1.015	1.349	TRUE	278.1	42.973	high_school_education_subset	YES	13
278.11	Morbid obesity	3	endocrine/metabolic	brown	5364	30856	1.98e-19	1.06951	0.837	1.302	TRUE	278.11	18.7043	high_school_education_subset	YES	13
401	Hypertension	8	circulatory system	red	21535	23181	8.05e-38	1.14798	0.973	1.323	TRUE	401	37.0944	high_school_education_subset	YES	13
401.1	Essential hypertension	8	circulatory system	red	21310	23181	2.81e-37	1.14339	0.968	1.319	TRUE	401.1	36.552	high_school_education_subset	YES	13
401.2	Hypertensive heart and/or renal disease	8	circulatory system	red	2625	23181	2.32e-23	1.83321	1.472	2.194	TRUE	401.2	22.6354	high_school_education_subset	YES	13
401.21	Hypertensive heart disease	8	circulatory system	red	1060	23181	4.45e-10	1.61349	1.106	2.12	TRUE	401.21	9.35199	high_school_education_subset	YES	13
401.22	Hypertensive chronic kidney disease	8	circulatory system	red	1567	23181	6.59e-17	1.85803	1.422	2.294	TRUE	401.22	16.181	high_school_education_subset	YES	13
428	Congestive heart failure; nonhypertensive	8	circulatory system	red	2218	39320	6.35e-11	1.13004	0.791	1.469	TRUE	428	10.1973	high_school_education_subset	YES	13
428.1	Congestive heart failure (CHF) NOS	8	circulatory system	red	1382	39320	7.18e-11	1.37716	0.963	1.791	TRUE	428.1	10.1437	high_school_education_subset	YES	13
512.7	Shortness of breath	9	respiratory	coral4	8247	21607	6.53e-09	0.704047	0.466	0.942	TRUE	512.7	8.185	high_school_education_subset	YES	13
585	Renal failure	11	genitourinary	black	4076	36480	2.21e-18	1.19297	0.926	1.46	TRUE	585	17.6559	high_school_education_subset	YES	13
585.1	Acute renal failure	11	genitourinary	black	1792	36480	3.11e-11	1.27355	0.898	1.649	TRUE	585.1	10.5067	high_school_education_subset	YES	13
585.3	Chronic renal failure [CKD]	11	genitourinary	black	2719	36480	6.66e-15	1.25765	0.941	1.574	TRUE	585.3	14.1767	high_school_education_subset	YES	13
250	Diabetes mellitus	3	endocrine/metabolic	brown	8051	29511	5.88e-43	1.37081	1.175	1.566	TRUE	250	42.231	assited_income_subset	YES	13
250.2	Type 2 diabetes	3	endocrine/metabolic	brown	7910	29511	2.04e-44	1.40496	1.208	1.602	TRUE	250.2	43.6907	assited_income_subset	YES	13
250.22	Type 2 diabetes with renal manifestations	3	endocrine/metabolic	brown	1371	29511	3.96e-21	1.91469	1.517	2.312	TRUE	250.22	20.4019	assited_income_subset	YES	13
250.23	Type 2 diabetes with ophthalmic manifestations	3	endocrine/metabolic	brown	741	29511	5.72e-27	2.68754	2.198	3.177	TRUE	250.23	26.2423	assited_income_subset	YES	13
250.24	Type 2 diabetes with neurological manifestations	3	endocrine/metabolic	brown	1924	29511	3.91e-19	1.63013	1.273	1.988	TRUE	250.24	18.408	assited_income_subset	YES	13
250.6	Polyneuropathy in diabetes	3	endocrine/metabolic	brown	1177	29511	6.61e-17	1.8477	1.414	2.281	TRUE	250.6	16.1799	assited_income_subset	YES	13
261	Vitamin deficiency	3	endocrine/metabolic	brown	11468	30089	1.05e-11	0.596256	0.424	0.768	TRUE	261	10.9801	assited_income_subset	YES	13
261.4	Vitamin D deficiency	3	endocrine/metabolic	brown	9806	30089	4.8e-11	0.606226	0.426	0.787	TRUE	261.4	10.3191	assited_income_subset	YES	13
278	Overweight, obesity and other hyperalimentation	3	endocrine/metabolic	brown	13189	30856	1.4e-34	1.00198	0.842	1.162	TRUE	278	33.8539	assited_income_subset	YES	13
278.1	Obesity	3	endocrine/metabolic	brown	13038	30856	1.15e-34	1.00595	0.845	1.166	TRUE	278.1	33.9387	assited_income_subset	YES	13
278.11	Morbid obesity	3	endocrine/metabolic	brown	5364	30856	7.87e-30	1.25274	1.036	1.469	TRUE	278.11	29.1039	assited_income_subset	YES	13
401	Hypertension	8	circulatory system	red	21535	23181	1.76e-41	1.15935	0.991	1.328	TRUE	401	40.7543	assited_income_subset	YES	13
401.1	Essential hypertension	8	circulatory system	red	21310	23181	1.04e-40	1.1533	0.984	1.323	TRUE	401.1	39.9812	assited_income_subset	YES	13
401.2	Hypertensive heart and/or renal disease	8	circulatory system	red	2625	23181	2.59e-37	2.24672	1.902	2.592	TRUE	401.2	36.5868	assited_income_subset	YES	13
401.21	Hypertensive heart disease	8	circulatory system	red	1060	23181	1.24e-16	2.08238	1.589	2.575	TRUE	401.21	15.9067	assited_income_subset	YES	13
401.22	Hypertensive chronic kidney disease	8	circulatory system	red	1567	23181	2.28e-28	2.32061	1.909	2.732	TRUE	401.22	27.6414	assited_income_subset	YES	13
428	Congestive heart failure; nonhypertensive	8	circulatory system	red	2218	39320	9.03e-12	1.12862	0.804	1.453	TRUE	428	11.0445	assited_income_subset	YES	13
428.1	Congestive heart failure (CHF) NOS	8	circulatory system	red	1382	39320	1.53e-12	1.4068	1.017	1.797	TRUE	428.1	11.8147	assited_income_subset	YES	13
512.7	Shortness of breath	9	respiratory	coral4	8247	21607	7.35e-16	0.949371	0.719	1.18	TRUE	512.7	15.1336	assited_income_subset	YES	13
585	Renal failure	11	genitourinary	black	4076	36480	7.82e-28	1.40976	1.157	1.662	TRUE	585	27.1066	assited_income_subset	YES	13
585.1	Acute renal failure	11	genitourinary	black	1792	36480	5.52e-20	1.63147	1.282	1.981	TRUE	585.1	19.2583	assited_income_subset	YES	13
585.3	Chronic renal failure [CKD]	11	genitourinary	black	2719	36480	1.29e-19	1.39011	1.089	1.691	TRUE	585.3	18.8878	assited_income_subset	YES	13
250	Diabetes mellitus	3	endocrine/metabolic	brown	8051	29511	2.37e-75	1.80368	1.611	1.996	TRUE	250	74.6245	no_health_insurance_subset	YES	13
250.2	Type 2 diabetes	3	endocrine/metabolic	brown	7910	29511	1.79e-78	1.85401	1.66	2.048	TRUE	250.2	77.7481	no_health_insurance_subset	YES	13
250.22	Type 2 diabetes with renal manifestations	3	endocrine/metabolic	brown	1371	29511	3.29e-18	1.80861	1.401	2.216	TRUE	250.22	17.4829	no_health_insurance_subset	YES	13
250.23	Type 2 diabetes with ophthalmic manifestations	3	endocrine/metabolic	brown	741	29511	1.5e-29	2.92159	2.414	3.429	TRUE	250.23	28.8229	no_health_insurance_subset	YES	13
250.24	Type 2 diabetes with neurological manifestations	3	endocrine/metabolic	brown	1924	29511	2.43e-21	1.71954	1.364	2.075	TRUE	250.24	20.6139	no_health_insurance_subset	YES	13
250.6	Polyneuropathy in diabetes	3	endocrine/metabolic	brown	1177	29511	6.01e-06	1.05058	0.596	1.506	TRUE	250.6	5.22091	no_health_insurance_subset	YES	13
261	Vitamin deficiency	3	endocrine/metabolic	brown	11468	30089	2.64e-16	0.716126	0.545	0.888	TRUE	261	15.5788	no_health_insurance_subset	YES	13
261.4	Vitamin D deficiency	3	endocrine/metabolic	brown	9806	30089	1.96e-17	0.780944	0.601	0.961	TRUE	261.4	16.7069	no_health_insurance_subset	YES	13
278	Overweight, obesity and other hyperalimentation	3	endocrine/metabolic	brown	13189	30856	3.08e-39	1.06716	0.908	1.227	TRUE	278	38.5115	no_health_insurance_subset	YES	13
278.1	Obesity	3	endocrine/metabolic	brown	13038	30856	2.86e-39	1.07089	0.911	1.231	TRUE	278.1	38.543	no_health_insurance_subset	YES	13
278.11	Morbid obesity	3	endocrine/metabolic	brown	5364	30856	1.1e-08	0.666789	0.438	0.895	TRUE	278.11	7.95815	no_health_insurance_subset	YES	13
401	Hypertension	8	circulatory system	red	21535	23181	2.98e-65	1.42835	1.264	1.592	TRUE	401	64.5263	no_health_insurance_subset	YES	13
401.1	Essential hypertension	8	circulatory system	red	21310	23181	9.9e-65	1.42668	1.262	1.591	TRUE	401.1	64.0044	no_health_insurance_subset	YES	13
401.2	Hypertensive heart and/or renal disease	8	circulatory system	red	2625	23181	5.97e-56	2.74857	2.407	3.09	TRUE	401.2	55.2239	no_health_insurance_subset	YES	13
401.21	Hypertensive heart disease	8	circulatory system	red	1060	23181	7.57e-22	2.3798	1.894	2.865	TRUE	401.21	21.1211	no_health_insurance_subset	YES	13
401.22	Hypertensive chronic kidney disease	8	circulatory system	red	1567	23181	9.8e-36	2.64177	2.227	3.057	TRUE	401.22	35.0088	no_health_insurance_subset	YES	13
428	Congestive heart failure; nonhypertensive	8	circulatory system	red	2218	39320	2.96e-18	1.42747	1.106	1.749	TRUE	428	17.5283	no_health_insurance_subset	YES	13
428.1	Congestive heart failure (CHF) NOS	8	circulatory system	red	1382	39320	3.22e-15	1.59181	1.196	1.988	TRUE	428.1	14.4925	no_health_insurance_subset	YES	13
512.7	Shortness of breath	9	respiratory	coral4	8247	21607	8.57e-15	0.881346	0.659	1.104	TRUE	512.7	14.0672	no_health_insurance_subset	YES	13
585	Renal failure	11	genitourinary	black	4076	36480	2.42e-36	1.63171	1.378	1.886	TRUE	585	35.6158	no_health_insurance_subset	YES	13
585.1	Acute renal failure	11	genitourinary	black	1792	36480	1.65e-19	1.66632	1.305	2.028	TRUE	585.1	18.7817	no_health_insurance_subset	YES	13
585.3	Chronic renal failure [CKD]	11	genitourinary	black	2719	36480	8.46e-33	1.828	1.528	2.128	TRUE	585.3	32.0727	no_health_insurance_subset	YES	13
250	Diabetes mellitus	3	endocrine/metabolic	brown	8051	29511	1.03e-44	1.67847	1.444	1.913	TRUE	250	43.9857	area_poverty_subset	YES	13
250.2	Type 2 diabetes	3	endocrine/metabolic	brown	7910	29511	5.93e-46	1.71619	1.48	1.953	TRUE	250.2	45.2267	area_poverty_subset	YES	13
250.22	Type 2 diabetes with renal manifestations	3	endocrine/metabolic	brown	1371	29511	4.43e-20	2.29308	1.803	2.783	TRUE	250.22	19.3532	area_poverty_subset	YES	13
250.23	Type 2 diabetes with ophthalmic manifestations	3	endocrine/metabolic	brown	741	29511	9.88e-17	2.69386	2.058	3.33	TRUE	250.23	16.0054	area_poverty_subset	YES	13
250.24	Type 2 diabetes with neurological manifestations	3	endocrine/metabolic	brown	1924	29511	1.34e-20	2.05078	1.619	2.483	TRUE	250.24	19.8741	area_poverty_subset	YES	13
250.6	Polyneuropathy in diabetes	3	endocrine/metabolic	brown	1177	29511	7.3e-13	1.96515	1.428	2.502	TRUE	250.6	12.1369	area_poverty_subset	YES	13
261	Vitamin deficiency	3	endocrine/metabolic	brown	11468	30089	7.57e-07	0.513143	0.31	0.716	TRUE	261	6.12087	area_poverty_subset	YES	13
261.4	Vitamin D deficiency	3	endocrine/metabolic	brown	9806	30089	7.29e-06	0.490086	0.276	0.704	TRUE	261.4	5.13735	area_poverty_subset	YES	13
278	Overweight, obesity and other hyperalimentation	3	endocrine/metabolic	brown	13189	30856	3.5e-33	1.1635	0.973	1.354	TRUE	278	32.4559	area_poverty_subset	YES	13
278.1	Obesity	3	endocrine/metabolic	brown	13038	30856	2.96e-33	1.16857	0.978	1.359	TRUE	278.1	32.5286	area_poverty_subset	YES	13
278.11	Morbid obesity	3	endocrine/metabolic	brown	5364	30856	2.65e-20	1.23672	0.974	1.499	TRUE	278.11	19.5765	area_poverty_subset	YES	13
401	Hypertension	8	circulatory system	red	21535	23181	4.87e-38	1.29821	1.101	1.496	TRUE	401	37.3121	area_poverty_subset	YES	13
401.1	Essential hypertension	8	circulatory system	red	21310	23181	4.12e-37	1.28709	1.089	1.485	TRUE	401.1	36.3847	area_poverty_subset	YES	13
401.2	Hypertensive heart and/or renal disease	8	circulatory system	red	2625	23181	1.4e-33	2.58654	2.167	3.006	TRUE	401.2	32.8552	area_poverty_subset	YES	13
401.21	Hypertensive heart disease	8	circulatory system	red	1060	23181	2.03e-14	2.34697	1.746	2.948	TRUE	401.21	13.6915	area_poverty_subset	YES	13
401.22	Hypertensive chronic kidney disease	8	circulatory system	red	1567	23181	1.06e-23	2.59568	2.089	3.103	TRUE	401.22	22.9744	area_poverty_subset	YES	13
428	Congestive heart failure; nonhypertensive	8	circulatory system	red	2218	39320	2.26e-12	1.39097	1.002	1.779	TRUE	428	11.6462	area_poverty_subset	YES	13
428.1	Congestive heart failure (CHF) NOS	8	circulatory system	red	1382	39320	2.94e-11	1.60898	1.135	2.083	TRUE	428.1	10.531	area_poverty_subset	YES	13
512.7	Shortness of breath	9	respiratory	coral4	8247	21607	1.52e-18	1.22947	0.955	1.504	TRUE	512.7	17.8176	area_poverty_subset	YES	13
585	Renal failure	11	genitourinary	black	4076	36480	7.45e-29	1.72334	1.42	2.026	TRUE	585	28.1277	area_poverty_subset	YES	13
585.1	Acute renal failure	11	genitourinary	black	1792	36480	2.17e-22	2.10813	1.684	2.533	TRUE	585.1	21.6639	area_poverty_subset	YES	13
585.3	Chronic renal failure [CKD]	11	genitourinary	black	2719	36480	8.19e-21	1.71949	1.359	2.08	TRUE	585.3	20.0868	area_poverty_subset	YES	13
250	Diabetes mellitus	3	endocrine/metabolic	brown	8051	29511	1.04e-31	1.48095	1.233	1.729	TRUE	250	30.9846	vacant_housing_subset	YES	13
250.2	Type 2 diabetes	3	endocrine/metabolic	brown	7910	29511	3.93e-33	1.52358	1.275	1.773	TRUE	250.2	32.4052	vacant_housing_subset	YES	13
250.22	Type 2 diabetes with renal manifestations	3	endocrine/metabolic	brown	1371	29511	4.33e-08	1.3283	0.853	1.804	TRUE	250.22	7.36375	vacant_housing_subset	YES	13
250.23	Type 2 diabetes with ophthalmic manifestations	3	endocrine/metabolic	brown	741	29511	1.7e-06	1.47311	0.87	2.076	TRUE	250.23	5.7689	vacant_housing_subset	YES	13
250.24	Type 2 diabetes with neurological manifestations	3	endocrine/metabolic	brown	1924	29511	3.48e-16	1.7055	1.296	2.115	TRUE	250.24	15.459	vacant_housing_subset	YES	13
250.6	Polyneuropathy in diabetes	3	endocrine/metabolic	brown	1177	29511	1.5e-09	1.54406	1.043	2.045	TRUE	250.6	8.82495	vacant_housing_subset	YES	13
261	Vitamin deficiency	3	endocrine/metabolic	brown	11468	30089	3.45e-18	0.977912	0.757	1.198	TRUE	261	17.4628	vacant_housing_subset	YES	13
261.4	Vitamin D deficiency	3	endocrine/metabolic	brown	9806	30089	2.57e-14	0.899106	0.668	1.13	TRUE	261.4	13.5894	vacant_housing_subset	YES	13
278	Overweight, obesity and other hyperalimentation	3	endocrine/metabolic	brown	13189	30856	2.28e-33	1.27857	1.07	1.487	TRUE	278	32.642	vacant_housing_subset	YES	13
278.1	Obesity	3	endocrine/metabolic	brown	13038	30856	5.76e-34	1.29392	1.085	1.503	TRUE	278.1	33.2393	vacant_housing_subset	YES	13
278.11	Morbid obesity	3	endocrine/metabolic	brown	5364	30856	1.89e-25	1.46703	1.191	1.743	TRUE	278.11	24.7245	vacant_housing_subset	YES	13
401	Hypertension	8	circulatory system	red	21535	23181	3.08e-68	2.04845	1.818	2.278	TRUE	401	67.5113	vacant_housing_subset	YES	13
401.1	Essential hypertension	8	circulatory system	red	21310	23181	2.22e-67	2.04325	1.812	2.274	TRUE	401.1	66.654	vacant_housing_subset	YES	13
401.2	Hypertensive heart and/or renal disease	8	circulatory system	red	2625	23181	1.04e-31	2.53181	2.108	2.955	TRUE	401.2	30.9847	vacant_housing_subset	YES	13
401.21	Hypertensive heart disease	8	circulatory system	red	1060	23181	9.94e-17	2.37745	1.816	2.938	TRUE	401.21	16.0027	vacant_housing_subset	YES	13
401.22	Hypertensive chronic kidney disease	8	circulatory system	red	1567	23181	3.41e-19	2.26452	1.769	2.76	TRUE	401.22	18.4672	vacant_housing_subset	YES	13
428	Congestive heart failure; nonhypertensive	8	circulatory system	red	2218	39320	3.26e-12	1.35884	0.977	1.741	TRUE	428	11.4872	vacant_housing_subset	YES	13
428.1	Congestive heart failure (CHF) NOS	8	circulatory system	red	1382	39320	1.28e-12	1.63	1.18	2.08	TRUE	428.1	11.8934	vacant_housing_subset	YES	13
512.7	Shortness of breath	9	respiratory	coral4	8247	21607	4.94e-17	1.24778	0.956	1.539	TRUE	512.7	16.306	vacant_housing_subset	YES	13
585	Renal failure	11	genitourinary	black	4076	36480	1.98e-18	1.38476	1.075	1.695	TRUE	585	17.7042	vacant_housing_subset	YES	13
585.1	Acute renal failure	11	genitourinary	black	1792	36480	7.82e-14	1.59971	1.18	2.019	TRUE	585.1	13.107	vacant_housing_subset	YES	13
585.3	Chronic renal failure [CKD]	11	genitourinary	black	2719	36480	1.16e-11	1.2516	0.89	1.613	TRUE	585.3	10.9342	vacant_housing_subset	YES	13
250	Diabetes mellitus	3	endocrine/metabolic	brown	8051	29511	4.5e-86	2.11056	1.9	2.321	TRUE	250	85.3468	deprivation_index_subset	YES	13
250.2	Type 2 diabetes	3	endocrine/metabolic	brown	7910	29511	4.37e-89	2.16657	1.954	2.379	TRUE	250.2	88.3593	deprivation_index_subset	YES	13
250.22	Type 2 diabetes with renal manifestations	3	endocrine/metabolic	brown	1371	29511	2.65e-27	2.44089	1.999	2.883	TRUE	250.22	26.5764	deprivation_index_subset	YES	13
250.23	Type 2 diabetes with ophthalmic manifestations	3	endocrine/metabolic	brown	741	29511	9.92e-29	3.25135	2.678	3.824	TRUE	250.23	28.0034	deprivation_index_subset	YES	13
250.24	Type 2 diabetes with neurological manifestations	3	endocrine/metabolic	brown	1924	29511	5.47e-35	2.43301	2.047	2.819	TRUE	250.24	34.2617	deprivation_index_subset	YES	13
250.6	Polyneuropathy in diabetes	3	endocrine/metabolic	brown	1177	29511	5.28e-21	2.29815	1.819	2.777	TRUE	250.6	20.2773	deprivation_index_subset	YES	13
261	Vitamin deficiency	3	endocrine/metabolic	brown	11468	30089	2.3e-21	0.877366	0.696	1.059	TRUE	261	20.638	deprivation_index_subset	YES	13
261.4	Vitamin D deficiency	3	endocrine/metabolic	brown	9806	30089	5.49e-20	0.891179	0.7	1.082	TRUE	261.4	19.2607	deprivation_index_subset	YES	13
278	Overweight, obesity and other hyperalimentation	3	endocrine/metabolic	brown	13189	30856	1e-72	1.56652	1.396	1.737	TRUE	278	71.9989	deprivation_index_subset	YES	13
278.1	Obesity	3	endocrine/metabolic	brown	13038	30856	7.56e-73	1.57257	1.402	1.743	TRUE	278.1	72.1217	deprivation_index_subset	YES	13
278.11	Morbid obesity	3	endocrine/metabolic	brown	5364	30856	6.16e-42	1.63495	1.399	1.871	TRUE	278.11	41.2107	deprivation_index_subset	YES	13
401	Hypertension	8	circulatory system	red	21535	23181	3.2e-82	1.72435	1.548	1.9	TRUE	401	81.4953	deprivation_index_subset	YES	13
401.1	Essential hypertension	8	circulatory system	red	21310	23181	5.04e-81	1.71801	1.541	1.895	TRUE	401.1	80.2975	deprivation_index_subset	YES	13
401.2	Hypertensive heart and/or renal disease	8	circulatory system	red	2625	23181	1.86e-56	3.06267	2.684	3.442	TRUE	401.2	55.7304	deprivation_index_subset	YES	13
401.21	Hypertensive heart disease	8	circulatory system	red	1060	23181	1.12e-24	2.82058	2.282	3.36	TRUE	401.21	23.9499	deprivation_index_subset	YES	13
401.22	Hypertensive chronic kidney disease	8	circulatory system	red	1567	23181	9.02e-38	3.00845	2.549	3.467	TRUE	401.22	37.0447	deprivation_index_subset	YES	13
428	Congestive heart failure; nonhypertensive	8	circulatory system	red	2218	39320	4.45e-19	1.5733	1.228	1.919	TRUE	428	18.3512	deprivation_index_subset	YES	13
428.1	Congestive heart failure (CHF) NOS	8	circulatory system	red	1382	39320	1.3e-16	1.79369	1.369	2.219	TRUE	428.1	15.8862	deprivation_index_subset	YES	13
512.7	Shortness of breath	9	respiratory	coral4	8247	21607	6.31e-25	1.26734	1.026	1.508	TRUE	512.7	24.2002	deprivation_index_subset	YES	13
585	Renal failure	11	genitourinary	black	4076	36480	5.51e-41	1.86374	1.591	2.136	TRUE	585	40.2591	deprivation_index_subset	YES	13
585.1	Acute renal failure	11	genitourinary	black	1792	36480	4.32e-26	2.0759	1.691	2.461	TRUE	585.1	25.365	deprivation_index_subset	YES	13
585.3	Chronic renal failure [CKD]	11	genitourinary	black	2719	36480	3.6e-31	1.91901	1.595	2.243	TRUE	585.3	30.4437	deprivation_index_subset	YES	13
276.14	Hypopotassemia	3	endocrine/metabolic	brown	2119	37548	1.16e-33	1.55179	1.3	1.803	TRUE	276.14	32.9359	SDOH	YES	12
276.4	Acid-base balance disorder	3	endocrine/metabolic	brown	501	37548	8.86e-16	1.97334	1.492	2.454	TRUE	276.4	15.0526	SDOH	YES	12
276.41	Acidosis	3	endocrine/metabolic	brown	425	37548	1.48e-13	1.96035	1.44	2.48	TRUE	276.41	12.8307	SDOH	YES	12
418	Nonspecific chest pain	8	circulatory system	red	11270	29705	1.2e-82	1.3898	1.248	1.531	TRUE	418	81.9203	SDOH	YES	12
428.3	Heart failure with reduced EF [Systolic or combined heart failure]	8	circulatory system	red	967	39320	1.99e-20	1.72596	1.361	2.091	TRUE	428.3	19.7002	SDOH	YES	12
496	Chronic airway obstruction	9	respiratory	coral4	3105	32082	2.34e-122	2.54773	2.335	2.76	TRUE	496	121.631	SDOH	YES	12
509.1	Respiratory failure	9	respiratory	coral4	797	40896	5.44e-26	2.03721	1.659	2.416	TRUE	509.1	25.2643	SDOH	YES	12
512	Other symptoms of respiratory system	9	respiratory	coral4	18553	21607	6.99e-41	0.923279	0.788	1.058	TRUE	512	40.1555	SDOH	YES	12
512.8	Cough	9	respiratory	coral4	8980	21607	4.03e-18	0.783798	0.607	0.961	TRUE	512.8	17.3952	SDOH	YES	12
512.9	Other dyspnea	9	respiratory	coral4	8848	21607	3.17e-35	1.08385	0.912	1.255	TRUE	512.9	34.4996	SDOH	YES	12
596	Other disorders of bladder	11	genitourinary	black	2097	42008	0.00017	0.508978	0.244	0.774	TRUE	596	3.76858	SDOH	NO	12
276.14	Hypopotassemia	3	endocrine/metabolic	brown	2119	37548	6.06e-16	1.4538	1.102	1.806	TRUE	276.14	15.2177	SCC	YES	12
276.4	Acid-base balance disorder	3	endocrine/metabolic	brown	501	37548	0.000355	1.28523	0.58	1.991	TRUE	276.4	3.4496	SCC	NO	12
276.41	Acidosis	3	endocrine/metabolic	brown	425	37548	0.00194678	1.21126	0.445	1.978	TRUE	276.41	2.71068	SCC	NO	12
418	Nonspecific chest pain	8	circulatory system	red	11270	29705	1.08e-50	1.45728	1.267	1.648	TRUE	418	49.9677	SCC	YES	12
428.3	Heart failure with reduced EF [Systolic or combined heart failure]	8	circulatory system	red	967	39320	0.00104683	0.887344	0.357	1.418	TRUE	428.3	2.98012	SCC	NO	12
496	Chronic airway obstruction	9	respiratory	coral4	3105	32082	3.01e-58	2.53493	2.226	2.844	TRUE	496	57.5215	SCC	YES	12
509.1	Respiratory failure	9	respiratory	coral4	797	40896	5.3e-11	1.85183	1.299	2.405	TRUE	509.1	10.2755	SCC	YES	12
512	Other symptoms of respiratory system	9	respiratory	coral4	18553	21607	2.6e-47	1.32096	1.142	1.5	TRUE	512	46.5843	SCC	YES	12
512.8	Cough	9	respiratory	coral4	8980	21607	5.94e-13	0.874139	0.636	1.112	TRUE	512.8	12.2262	SCC	YES	12
512.9	Other dyspnea	9	respiratory	coral4	8848	21607	1.76e-46	1.67752	1.448	1.907	TRUE	512.9	45.7544	SCC	YES	12
596	Other disorders of bladder	11	genitourinary	black	2097	42008	6.82e-14	1.34535	0.993	1.697	TRUE	596	13.1663	SCC	YES	12
276.14	Hypopotassemia	3	endocrine/metabolic	brown	2119	37548	2.47e-09	0.858251	0.576	1.14	TRUE	276.14	8.60742	NBD	YES	12
276.4	Acid-base balance disorder	3	endocrine/metabolic	brown	501	37548	7.75e-10	1.65231	1.126	2.179	TRUE	276.4	9.11059	NBD	YES	12
276.41	Acidosis	3	endocrine/metabolic	brown	425	37548	1.93e-07	1.52961	0.954	2.105	TRUE	276.41	6.71444	NBD	YES	12
418	Nonspecific chest pain	8	circulatory system	red	11270	29705	3.67e-26	0.824042	0.671	0.977	TRUE	418	25.4357	NBD	YES	12
428.3	Heart failure with reduced EF [Systolic or combined heart failure]	8	circulatory system	red	967	39320	2.13e-07	1.08197	0.673	1.491	TRUE	428.3	6.67112	NBD	YES	12
496	Chronic airway obstruction	9	respiratory	coral4	3105	32082	5.17e-37	1.56665	1.325	1.808	TRUE	496	36.2861	NBD	YES	12
509.1	Respiratory failure	9	respiratory	coral4	797	40896	1.95e-13	1.58674	1.164	2.01	TRUE	509.1	12.7089	NBD	YES	12
512	Other symptoms of respiratory system	9	respiratory	coral4	18553	21607	4.66e-18	0.635998	0.492	0.78	TRUE	512	17.3314	NBD	YES	12
512.8	Cough	9	respiratory	coral4	8980	21607	2.16e-08	0.543695	0.353	0.734	TRUE	512.8	7.66584	NBD	YES	12
512.9	Other dyspnea	9	respiratory	coral4	8848	21607	1.09e-15	0.758449	0.573	0.944	TRUE	512.9	14.9627	NBD	YES	12
596	Other disorders of bladder	11	genitourinary	black	2097	42008	3.94e-06	0.667564	0.384	0.951	TRUE	596	5.40499	NBD	YES	12
276.14	Hypopotassemia	3	endocrine/metabolic	brown	2119	37548	1.56e-64	2.07928	1.839	2.32	TRUE	276.14	63.8061	ES	YES	12
276.4	Acid-base balance disorder	3	endocrine/metabolic	brown	501	37548	4.28e-28	2.54728	2.093	3.002	TRUE	276.4	27.3687	ES	YES	12
276.41	Acidosis	3	endocrine/metabolic	brown	425	37548	3.06e-25	2.59392	2.104	3.084	TRUE	276.41	24.5145	ES	YES	12
418	Nonspecific chest pain	8	circulatory system	red	11270	29705	6.65e-94	1.48733	1.346	1.629	TRUE	418	93.1773	ES	YES	12
428.3	Heart failure with reduced EF [Systolic or combined heart failure]	8	circulatory system	red	967	39320	1.4e-36	2.33746	1.975	2.7	TRUE	428.3	35.8552	ES	YES	12
496	Chronic airway obstruction	9	respiratory	coral4	3105	32082	4e-174	3.16035	2.94	3.381	TRUE	496	173.398	ES	YES	12
509.1	Respiratory failure	9	respiratory	coral4	797	40896	6.45e-40	2.5077	2.136	2.879	TRUE	509.1	39.1903	ES	YES	12
512	Other symptoms of respiratory system	9	respiratory	coral4	18553	21607	1.68e-65	1.1776	1.043	1.313	TRUE	512	64.7746	ES	YES	12
512.8	Cough	9	respiratory	coral4	8980	21607	1.99e-26	0.964021	0.786	1.142	TRUE	512.8	25.7004	ES	YES	12
512.9	Other dyspnea	9	respiratory	coral4	8848	21607	4.85e-57	1.39346	1.222	1.565	TRUE	512.9	56.3138	ES	YES	12
596	Other disorders of bladder	11	genitourinary	black	2097	42008	9.4e-22	1.2462	0.991	1.501	TRUE	596	21.0268	ES	YES	12
276.14	Hypopotassemia	3	endocrine/metabolic	brown	2119	37548	1.08e-26	1.80555	1.475	2.136	TRUE	276.14	25.9653	HCAU	YES	12
276.4	Acid-base balance disorder	3	endocrine/metabolic	brown	501	37548	1.58e-07	1.78545	1.118	2.453	TRUE	276.4	6.80261	HCAU	YES	12
276.41	Acidosis	3	endocrine/metabolic	brown	425	37548	1.5e-07	1.92654	1.208	2.645	TRUE	276.41	6.82425	HCAU	YES	12
418	Nonspecific chest pain	8	circulatory system	red	11270	29705	2.21e-68	1.6081	1.428	1.788	TRUE	418	67.6562	HCAU	YES	12
428.3	Heart failure with reduced EF [Systolic or combined heart failure]	8	circulatory system	red	967	39320	8.74e-09	1.50214	0.99	2.014	TRUE	428.3	8.05857	HCAU	YES	12
496	Chronic airway obstruction	9	respiratory	coral4	3105	32082	1.37e-77	2.81646	2.52	3.113	TRUE	496	76.8623	HCAU	YES	12
509.1	Respiratory failure	9	respiratory	coral4	797	40896	9.77e-18	2.29709	1.772	2.822	TRUE	509.1	17.0102	HCAU	YES	12
512	Other symptoms of respiratory system	9	respiratory	coral4	18553	21607	1.91e-63	1.44445	1.276	1.613	TRUE	512	62.7179	HCAU	YES	12
512.8	Cough	9	respiratory	coral4	8980	21607	1.17e-20	1.06244	0.839	1.286	TRUE	512.8	19.9324	HCAU	YES	12
512.9	Other dyspnea	9	respiratory	coral4	8848	21607	5.6e-65	1.88268	1.666	2.099	TRUE	512.9	64.2519	HCAU	YES	12
596	Other disorders of bladder	11	genitourinary	black	2097	42008	9.19e-17	1.42912	1.092	1.766	TRUE	596	16.0369	HCAU	YES	12
276.14	Hypopotassemia	3	endocrine/metabolic	brown	2119	36820	6.16e-45	1.21545	1.046	1.385	TRUE	276.14	44.2103	education	YES	12
276.4	Acid-base balance disorder	3	endocrine/metabolic	brown	501	36820	7.47e-23	1.67394	1.341	2.007	TRUE	276.4	22.1269	education	YES	12
276.41	Acidosis	3	endocrine/metabolic	brown	425	36820	7.52e-19	1.63109	1.271	1.992	TRUE	276.41	18.1239	education	YES	12
418	Nonspecific chest pain	8	circulatory system	red	11270	28977	1.93e-85	0.923653	0.831	1.016	TRUE	418	84.7153	education	YES	12
428.3	Heart failure with reduced EF [Systolic or combined heart failure]	8	circulatory system	red	967	38592	9.8e-27	1.33533	1.091	1.58	TRUE	428.3	26.0088	education	YES	12
496	Chronic airway obstruction	9	respiratory	coral4	3105	31354	4.06e-154	1.96425	1.819	2.11	TRUE	496	153.391	education	YES	12
509.1	Respiratory failure	9	respiratory	coral4	797	40168	1.06e-34	1.65674	1.392	1.921	TRUE	509.1	33.9727	education	YES	12
512	Other symptoms of respiratory system	9	respiratory	coral4	18553	20879	3.62e-46	0.632655	0.546	0.72	TRUE	512	45.4415	education	YES	12
512.8	Cough	9	respiratory	coral4	8980	20879	6.04e-15	0.454014	0.34	0.568	TRUE	512.8	14.2189	education	YES	12
512.9	Other dyspnea	9	respiratory	coral4	8848	20879	2.4e-42	0.772034	0.661	0.883	TRUE	512.9	41.62	education	YES	12
596	Other disorders of bladder	11	genitourinary	black	2097	41280	1.68e-08	0.491383	0.321	0.662	TRUE	596	7.77493	education	YES	12
276.14	Hypopotassemia	3	endocrine/metabolic	brown	2119	37548	2.06e-33	2.23528	1.872	2.599	TRUE	276.14	32.6858	median_income_subset	YES	12
276.4	Acid-base balance disorder	3	endocrine/metabolic	brown	501	37548	7.31e-10	2.26202	1.542	2.982	TRUE	276.4	9.13608	median_income_subset	YES	12
276.41	Acidosis	3	endocrine/metabolic	brown	425	37548	3.22e-09	2.37298	1.587	3.159	TRUE	276.41	8.49216	median_income_subset	YES	12
418	Nonspecific chest pain	8	circulatory system	red	11270	29705	4.41e-21	0.829474	0.657	1.002	TRUE	418	20.3559	median_income_subset	YES	12
428.3	Heart failure with reduced EF [Systolic or combined heart failure]	8	circulatory system	red	967	39320	1.86e-06	1.13423	0.668	1.6	TRUE	428.3	5.7299	median_income_subset	YES	12
496	Chronic airway obstruction	9	respiratory	coral4	3105	32082	1.9e-44	2.16393	1.861	2.467	TRUE	496	43.7222	median_income_subset	YES	12
509.1	Respiratory failure	9	respiratory	coral4	797	40896	9.34e-09	1.60558	1.058	2.154	TRUE	509.1	8.0297	median_income_subset	YES	12
512	Other symptoms of respiratory system	9	respiratory	coral4	18553	21607	4.36e-50	1.24764	1.083	1.412	TRUE	512	49.3609	median_income_subset	YES	12
512.8	Cough	9	respiratory	coral4	8980	21607	2.77e-25	1.13217	0.919	1.346	TRUE	512.8	24.5574	median_income_subset	YES	12
512.9	Other dyspnea	9	respiratory	coral4	8848	21607	4.2e-40	1.43638	1.224	1.649	TRUE	512.9	39.3768	median_income_subset	YES	12
596	Other disorders of bladder	11	genitourinary	black	2097	42008	5.86e-08	0.89029	0.569	1.212	TRUE	596	7.23203	median_income_subset	YES	12
276.14	Hypopotassemia	3	endocrine/metabolic	brown	2119	37548	0.406593	0.152982	-0.208	0.514	TRUE	276.14	0.39084	high_school_education_subset	NO	12
276.4	Acid-base balance disorder	3	endocrine/metabolic	brown	501	37548	6.11e-09	1.89708	1.258	2.537	TRUE	276.4	8.21386	high_school_education_subset	YES	12
276.41	Acidosis	3	endocrine/metabolic	brown	425	37548	1.11e-07	1.87738	1.184	2.571	TRUE	276.41	6.95524	high_school_education_subset	YES	12
418	Nonspecific chest pain	8	circulatory system	red	11270	29705	3.49e-06	0.451961	0.261	0.643	TRUE	418	5.45742	high_school_education_subset	YES	12
428.3	Heart failure with reduced EF [Systolic or combined heart failure]	8	circulatory system	red	967	39320	7.03e-07	1.22253	0.739	1.706	TRUE	428.3	6.15287	high_school_education_subset	YES	12
496	Chronic airway obstruction	9	respiratory	coral4	3105	32082	0.000165	0.581867	0.279	0.885	TRUE	496	3.78165	high_school_education_subset	NO	12
509.1	Respiratory failure	9	respiratory	coral4	797	40896	1.59e-06	1.30132	0.77	1.833	TRUE	509.1	5.79799	high_school_education_subset	YES	12
512	Other symptoms of respiratory system	9	respiratory	coral4	18553	21607	0.00755887	0.245832	0.065	0.426	TRUE	512	2.12154	high_school_education_subset	NO	12
512.8	Cough	9	respiratory	coral4	8980	21607	0.358899	0.110496	-0.126	0.347	TRUE	512.8	0.445028	high_school_education_subset	NO	12
512.9	Other dyspnea	9	respiratory	coral4	8848	21607	0.0267002	0.263377	0.03	0.496	TRUE	512.9	1.57349	high_school_education_subset	NO	12
596	Other disorders of bladder	11	genitourinary	black	2097	42008	4.68e-07	0.876493	0.536	1.217	TRUE	596	6.3295	high_school_education_subset	YES	12
276.14	Hypopotassemia	3	endocrine/metabolic	brown	2119	37548	1.41e-06	0.79882	0.474	1.123	TRUE	276.14	5.85137	assited_income_subset	YES	12
276.4	Acid-base balance disorder	3	endocrine/metabolic	brown	501	37548	6.81e-07	1.5398	0.932	2.147	TRUE	276.4	6.16688	assited_income_subset	YES	12
276.41	Acidosis	3	endocrine/metabolic	brown	425	37548	2.62e-06	1.57086	0.916	2.226	TRUE	276.41	5.58214	assited_income_subset	YES	12
418	Nonspecific chest pain	8	circulatory system	red	11270	29705	1.94e-14	0.719689	0.535	0.904	TRUE	418	13.7115	assited_income_subset	YES	12
428.3	Heart failure with reduced EF [Systolic or combined heart failure]	8	circulatory system	red	967	39320	1.29e-06	1.15421	0.687	1.622	TRUE	428.3	5.88918	assited_income_subset	YES	12
496	Chronic airway obstruction	9	respiratory	coral4	3105	32082	6.19e-12	0.996443	0.712	1.281	TRUE	496	11.2081	assited_income_subset	YES	12
509.1	Respiratory failure	9	respiratory	coral4	797	40896	0.0600837	0.510773	-0.022	1.043	TRUE	509.1	1.22124	assited_income_subset	NO	12
512	Other symptoms of respiratory system	9	respiratory	coral4	18553	21607	1.65e-14	0.690443	0.514	0.867	TRUE	512	13.7822	assited_income_subset	YES	12
512.8	Cough	9	respiratory	coral4	8980	21607	4.73e-07	0.582889	0.356	0.81	TRUE	512.8	6.32549	assited_income_subset	YES	12
512.9	Other dyspnea	9	respiratory	coral4	8848	21607	7.18e-14	0.847883	0.626	1.07	TRUE	512.9	13.1439	assited_income_subset	YES	12
596	Other disorders of bladder	11	genitourinary	black	2097	42008	1.73e-08	0.91633	0.598	1.235	TRUE	596	7.76316	assited_income_subset	YES	12
276.14	Hypopotassemia	3	endocrine/metabolic	brown	2119	37548	4.43e-06	0.794799	0.455	1.134	TRUE	276.14	5.35349	no_health_insurance_subset	YES	12
276.4	Acid-base balance disorder	3	endocrine/metabolic	brown	501	37548	5.33e-13	2.27208	1.655	2.889	TRUE	276.4	12.2731	no_health_insurance_subset	YES	12
276.41	Acidosis	3	endocrine/metabolic	brown	425	37548	2.88e-12	2.35954	1.697	3.022	TRUE	276.41	11.5401	no_health_insurance_subset	YES	12
418	Nonspecific chest pain	8	circulatory system	red	11270	29705	3.13e-05	0.38845	0.206	0.571	TRUE	418	4.50455	no_health_insurance_subset	NO	12
428.3	Heart failure with reduced EF [Systolic or combined heart failure]	8	circulatory system	red	967	39320	1.28e-11	1.57913	1.122	2.036	TRUE	428.3	10.8944	no_health_insurance_subset	YES	12
496	Chronic airway obstruction	9	respiratory	coral4	3105	32082	1.95e-07	0.770491	0.48	1.061	TRUE	496	6.71099	no_health_insurance_subset	YES	12
509.1	Respiratory failure	9	respiratory	coral4	797	40896	2.54e-15	2.01874	1.519	2.519	TRUE	509.1	14.5945	no_health_insurance_subset	YES	12
512	Other symptoms of respiratory system	9	respiratory	coral4	18553	21607	4.67e-12	0.597052	0.428	0.766	TRUE	512	11.3311	no_health_insurance_subset	YES	12
512.8	Cough	9	respiratory	coral4	8980	21607	6.86e-11	0.733974	0.513	0.954	TRUE	512.8	10.1636	no_health_insurance_subset	YES	12
512.9	Other dyspnea	9	respiratory	coral4	8848	21607	7.17e-08	0.592787	0.377	0.808	TRUE	512.9	7.14435	no_health_insurance_subset	YES	12
596	Other disorders of bladder	11	genitourinary	black	2097	42008	3.26e-06	0.791201	0.458	1.124	TRUE	596	5.48702	no_health_insurance_subset	YES	12
276.14	Hypopotassemia	3	endocrine/metabolic	brown	2119	37548	4.32e-11	1.29465	0.91	1.68	TRUE	276.14	10.3648	area_poverty_subset	YES	12
276.4	Acid-base balance disorder	3	endocrine/metabolic	brown	501	37548	1.26e-11	2.52263	1.793	3.253	TRUE	276.4	10.8997	area_poverty_subset	YES	12
276.41	Acidosis	3	endocrine/metabolic	brown	425	37548	1.54e-10	2.57123	1.784	3.358	TRUE	276.41	9.81307	area_poverty_subset	YES	12
418	Nonspecific chest pain	8	circulatory system	red	11270	29705	1.06e-17	0.948464	0.731	1.165	TRUE	418	16.9765	area_poverty_subset	YES	12
428.3	Heart failure with reduced EF [Systolic or combined heart failure]	8	circulatory system	red	967	39320	7.73e-08	1.53703	0.976	2.098	TRUE	428.3	7.11165	area_poverty_subset	YES	12
496	Chronic airway obstruction	9	respiratory	coral4	3105	32082	4.86e-09	1.01866	0.677	1.36	TRUE	496	8.31313	area_poverty_subset	YES	12
509.1	Respiratory failure	9	respiratory	coral4	797	40896	1.06e-06	1.50603	0.901	2.111	TRUE	509.1	5.97389	area_poverty_subset	YES	12
512	Other symptoms of respiratory system	9	respiratory	coral4	18553	21607	1.99e-24	1.08389	0.876	1.292	TRUE	512	23.7002	area_poverty_subset	YES	12
512.8	Cough	9	respiratory	coral4	8980	21607	3.46e-19	1.21773	0.951	1.484	TRUE	512.8	18.4604	area_poverty_subset	YES	12
512.9	Other dyspnea	9	respiratory	coral4	8848	21607	3.76e-15	1.05843	0.795	1.322	TRUE	512.9	14.4248	area_poverty_subset	YES	12
596	Other disorders of bladder	11	genitourinary	black	2097	42008	1.44e-08	1.10666	0.724	1.489	TRUE	596	7.84201	area_poverty_subset	YES	12
276.14	Hypopotassemia	3	endocrine/metabolic	brown	2119	37548	6.15e-15	1.54614	1.158	1.935	TRUE	276.14	14.2114	vacant_housing_subset	YES	12
276.4	Acid-base balance disorder	3	endocrine/metabolic	brown	501	37548	3.4e-11	2.29444	1.616	2.973	TRUE	276.4	10.4681	vacant_housing_subset	YES	12
276.41	Acidosis	3	endocrine/metabolic	brown	425	37548	1.24e-10	2.38063	1.656	3.106	TRUE	276.41	9.90794	vacant_housing_subset	YES	12
418	Nonspecific chest pain	8	circulatory system	red	11270	29705	5.74e-13	0.870749	0.634	1.108	TRUE	418	12.2409	vacant_housing_subset	YES	12
428.3	Heart failure with reduced EF [Systolic or combined heart failure]	8	circulatory system	red	967	39320	6.07e-07	1.3709	0.832	1.909	TRUE	428.3	6.21662	vacant_housing_subset	YES	12
496	Chronic airway obstruction	9	respiratory	coral4	3105	32082	6.36e-26	1.79088	1.458	2.124	TRUE	496	25.1965	vacant_housing_subset	YES	12
509.1	Respiratory failure	9	respiratory	coral4	797	40896	8.42e-08	1.63985	1.04	2.24	TRUE	509.1	7.07448	vacant_housing_subset	YES	12
512	Other symptoms of respiratory system	9	respiratory	coral4	18553	21607	2.11e-18	1.02514	0.796	1.255	TRUE	512	17.6752	vacant_housing_subset	YES	12
512.8	Cough	9	respiratory	coral4	8980	21607	4.45e-15	1.15167	0.864	1.44	TRUE	512.8	14.3513	vacant_housing_subset	YES	12
512.9	Other dyspnea	9	respiratory	coral4	8848	21607	5.89e-14	1.07232	0.792	1.352	TRUE	512.9	13.2301	vacant_housing_subset	YES	12
596	Other disorders of bladder	11	genitourinary	black	2097	42008	4.42e-06	0.934928	0.536	1.334	TRUE	596	5.35485	vacant_housing_subset	YES	12
276.14	Hypopotassemia	3	endocrine/metabolic	brown	2119	37548	7.1e-15	1.38389	1.035	1.732	TRUE	276.14	14.1487	deprivation_index_subset	YES	12
276.4	Acid-base balance disorder	3	endocrine/metabolic	brown	501	37548	2.83e-14	2.60073	1.931	3.271	TRUE	276.4	13.5481	deprivation_index_subset	YES	12
276.41	Acidosis	3	endocrine/metabolic	brown	425	37548	4.97e-13	2.66545	1.942	3.388	TRUE	276.41	12.3036	deprivation_index_subset	YES	12
418	Nonspecific chest pain	8	circulatory system	red	11270	29705	4.31e-18	0.853279	0.66	1.046	TRUE	418	17.3653	deprivation_index_subset	YES	12
428.3	Heart failure with reduced EF [Systolic or combined heart failure]	8	circulatory system	red	967	39320	9.78e-11	1.64473	1.147	2.143	TRUE	428.3	10.0095	deprivation_index_subset	YES	12
496	Chronic airway obstruction	9	respiratory	coral4	3105	32082	5.53e-22	1.48596	1.184	1.788	TRUE	496	21.2576	deprivation_index_subset	YES	12
509.1	Respiratory failure	9	respiratory	coral4	797	40896	4.58e-10	1.73448	1.189	2.28	TRUE	509.1	9.339	deprivation_index_subset	YES	12
512	Other symptoms of respiratory system	9	respiratory	coral4	18553	21607	1.09e-27	1.02087	0.837	1.204	TRUE	512	26.9612	deprivation_index_subset	YES	12
512.8	Cough	9	respiratory	coral4	8980	21607	1.23e-16	0.997545	0.761	1.234	TRUE	512.8	15.9098	deprivation_index_subset	YES	12
512.9	Other dyspnea	9	respiratory	coral4	8848	21607	5.51e-21	1.11225	0.88	1.344	TRUE	512.9	20.2591	deprivation_index_subset	YES	12
596	Other disorders of bladder	11	genitourinary	black	2097	42008	1.44e-10	1.12933	0.784	1.475	TRUE	596	9.84265	deprivation_index_subset	YES	12
250.1	Type 1 diabetes	3	endocrine/metabolic	brown	810	29511	3.45e-07	1.10045	0.677	1.524	TRUE	250.1	6.46167	SDOH	YES	11
250.42	Other abnormal glucose	3	endocrine/metabolic	brown	5582	29511	4.99e-10	0.600671	0.411	0.79	TRUE	250.42	9.30206	SDOH	YES	11
271	Disorders of carbohydrate transport and metabolism	3	endocrine/metabolic	brown	3899	41585	1.98e-13	0.720355	0.528	0.912	TRUE	271	12.7027	SDOH	YES	11
271.3	Intestinal disaccharidase deficiencies and disaccharide malabsorption	3	endocrine/metabolic	brown	3835	41585	2.94e-14	0.748353	0.555	0.941	TRUE	271.3	13.532	SDOH	YES	11
276	Disorders of fluid, electrolyte, and acid-base balance	3	endocrine/metabolic	brown	5327	37548	4.49e-45	1.26532	1.089	1.441	TRUE	276	44.3479	SDOH	YES	11
276.1	Electrolyte imbalance	3	endocrine/metabolic	brown	4341	37548	2.7e-34	1.19791	1.006	1.39	TRUE	276.1	33.568	SDOH	YES	11
411	Ischemic Heart Disease	8	circulatory system	red	6375	37728	8.47e-32	1.06197	0.885	1.239	TRUE	411	31.0723	SDOH	YES	11
586	Other disorders of the kidney and ureters	11	genitourinary	black	3804	36480	4.56e-10	0.693578	0.475	0.912	TRUE	586	9.34061	SDOH	YES	11
591	Urinary tract infection	11	genitourinary	black	5681	32116	9.68e-23	0.908387	0.727	1.09	TRUE	591	22.0143	SDOH	YES	11
250.1	Type 1 diabetes	3	endocrine/metabolic	brown	810	29511	0.0134446	0.718889	0.149	1.289	TRUE	250.1	1.87145	SCC	NO	11
250.42	Other abnormal glucose	3	endocrine/metabolic	brown	5582	29511	0.000292	0.460869	0.211	0.71	TRUE	250.42	3.53442	SCC	NO	11
271	Disorders of carbohydrate transport and metabolism	3	endocrine/metabolic	brown	3899	41585	5.6e-07	0.671473	0.408	0.934	TRUE	271	6.25148	SCC	YES	11
271.3	Intestinal disaccharidase deficiencies and disaccharide malabsorption	3	endocrine/metabolic	brown	3835	41585	7.73e-07	0.668083	0.403	0.933	TRUE	271.3	6.11205	SCC	YES	11
276	Disorders of fluid, electrolyte, and acid-base balance	3	endocrine/metabolic	brown	5327	37548	3.13e-16	1.01412	0.771	1.257	TRUE	276	15.504	SCC	YES	11
276.1	Electrolyte imbalance	3	endocrine/metabolic	brown	4341	37548	5.99e-11	0.890698	0.624	1.157	TRUE	276.1	10.2224	SCC	YES	11
411	Ischemic Heart Disease	8	circulatory system	red	6375	37728	8.15e-10	0.765914	0.522	1.01	TRUE	411	9.08898	SCC	YES	11
586	Other disorders of the kidney and ureters	11	genitourinary	black	3804	36480	6.8e-08	0.801023	0.51	1.092	TRUE	586	7.16743	SCC	YES	11
591	Urinary tract infection	11	genitourinary	black	5681	32116	1.12e-06	0.612895	0.366	0.86	TRUE	591	5.94994	SCC	YES	11
250.1	Type 1 diabetes	3	endocrine/metabolic	brown	810	29511	8.64e-07	1.10489	0.665	1.545	TRUE	250.1	6.06355	NBD	YES	11
250.42	Other abnormal glucose	3	endocrine/metabolic	brown	5582	29511	5.71e-08	0.547424	0.35	0.745	TRUE	250.42	7.24321	NBD	YES	11
271	Disorders of carbohydrate transport and metabolism	3	endocrine/metabolic	brown	3899	41585	5.13e-24	1.04542	0.843	1.248	TRUE	271	23.2897	NBD	YES	11
271.3	Intestinal disaccharidase deficiencies and disaccharide malabsorption	3	endocrine/metabolic	brown	3835	41585	1.45e-24	1.06418	0.86	1.268	TRUE	271.3	23.8396	NBD	YES	11
276	Disorders of fluid, electrolyte, and acid-base balance	3	endocrine/metabolic	brown	5327	37548	2.22e-17	0.835965	0.643	1.029	TRUE	276	16.6541	NBD	YES	11
276.1	Electrolyte imbalance	3	endocrine/metabolic	brown	4341	37548	1.11e-09	0.664098	0.45	0.878	TRUE	276.1	8.95498	NBD	YES	11
411	Ischemic Heart Disease	8	circulatory system	red	6375	37728	2.44e-06	0.471326	0.275	0.667	TRUE	411	5.61206	NBD	YES	11
586	Other disorders of the kidney and ureters	11	genitourinary	black	3804	36480	0.00382093	0.349275	0.113	0.586	TRUE	586	2.41783	NBD	NO	11
591	Urinary tract infection	11	genitourinary	black	5681	32116	1.46e-10	0.641935	0.446	0.838	TRUE	591	9.83621	NBD	YES	11
250.1	Type 1 diabetes	3	endocrine/metabolic	brown	810	29511	1.91e-11	1.3717	0.971	1.772	TRUE	250.1	10.7186	ES	YES	11
250.42	Other abnormal glucose	3	endocrine/metabolic	brown	5582	29511	5e-13	0.693212	0.505	0.881	TRUE	250.42	12.3011	ES	YES	11
271	Disorders of carbohydrate transport and metabolism	3	endocrine/metabolic	brown	3899	41585	7.73e-25	0.996518	0.807	1.186	TRUE	271	24.112	ES	YES	11
271.3	Intestinal disaccharidase deficiencies and disaccharide malabsorption	3	endocrine/metabolic	brown	3835	41585	7.19e-25	1.00357	0.813	1.195	TRUE	271.3	24.1436	ES	YES	11
276	Disorders of fluid, electrolyte, and acid-base balance	3	endocrine/metabolic	brown	5327	37548	6.87e-78	1.65555	1.482	1.829	TRUE	276	77.1628	ES	YES	11
276.1	Electrolyte imbalance	3	endocrine/metabolic	brown	4341	37548	1.08e-55	1.53417	1.343	1.725	TRUE	276.1	54.968	ES	YES	11
411	Ischemic Heart Disease	8	circulatory system	red	6375	37728	9.83e-40	1.25893	1.072	1.446	TRUE	411	39.0075	ES	YES	11
586	Other disorders of the kidney and ureters	11	genitourinary	black	3804	36480	2.04e-16	0.940313	0.716	1.165	TRUE	586	15.691	ES	YES	11
591	Urinary tract infection	11	genitourinary	black	5681	32116	4.42e-24	0.921169	0.743	1.1	TRUE	591	23.355	ES	YES	11
250.1	Type 1 diabetes	3	endocrine/metabolic	brown	810	29511	2.6e-10	1.70765	1.178	2.237	TRUE	250.1	9.58503	HCAU	YES	11
250.42	Other abnormal glucose	3	endocrine/metabolic	brown	5582	29511	3.06e-07	0.617124	0.381	0.853	TRUE	250.42	6.51486	HCAU	YES	11
271	Disorders of carbohydrate transport and metabolism	3	endocrine/metabolic	brown	3899	41585	0.000591	0.441323	0.19	0.693	TRUE	271	3.22829	HCAU	NO	11
271.3	Intestinal disaccharidase deficiencies and disaccharide malabsorption	3	endocrine/metabolic	brown	3835	41585	0.00101368	0.425381	0.172	0.679	TRUE	271.3	2.9941	HCAU	NO	11
276	Disorders of fluid, electrolyte, and acid-base balance	3	endocrine/metabolic	brown	5327	37548	4.28e-29	1.31943	1.088	1.55	TRUE	276	28.3687	HCAU	YES	11
276.1	Electrolyte imbalance	3	endocrine/metabolic	brown	4341	37548	6.86e-21	1.21319	0.96	1.467	TRUE	276.1	20.1637	HCAU	YES	11
411	Ischemic Heart Disease	8	circulatory system	red	6375	37728	7.78e-26	1.27449	1.037	1.512	TRUE	411	25.1091	HCAU	YES	11
586	Other disorders of the kidney and ureters	11	genitourinary	black	3804	36480	1.97e-07	0.759142	0.473	1.045	TRUE	586	6.70511	HCAU	YES	11
591	Urinary tract infection	11	genitourinary	black	5681	32116	3.77e-14	0.88772	0.658	1.118	TRUE	591	13.4241	HCAU	YES	11
250.1	Type 1 diabetes	3	endocrine/metabolic	brown	810	28783	6.78e-13	1.0124	0.736	1.289	TRUE	250.1	12.1686	education	YES	11
250.42	Other abnormal glucose	3	endocrine/metabolic	brown	5582	28783	1.69e-10	0.390596	0.271	0.51	TRUE	250.42	9.77097	education	YES	11
271	Disorders of carbohydrate transport and metabolism	3	endocrine/metabolic	brown	3899	40857	2.08e-21	0.605502	0.481	0.73	TRUE	271	20.6827	education	YES	11
271.3	Intestinal disaccharidase deficiencies and disaccharide malabsorption	3	endocrine/metabolic	brown	3835	40857	3.81e-22	0.620513	0.495	0.746	TRUE	271.3	21.4186	education	YES	11
276	Disorders of fluid, electrolyte, and acid-base balance	3	endocrine/metabolic	brown	5327	36820	1.55e-56	0.93683	0.821	1.053	TRUE	276	55.8089	education	YES	11
276.1	Electrolyte imbalance	3	endocrine/metabolic	brown	4341	36820	7.43e-42	0.872875	0.747	0.999	TRUE	276.1	41.129	education	YES	11
411	Ischemic Heart Disease	8	circulatory system	red	6375	37000	1.12e-35	0.723847	0.61	0.838	TRUE	411	34.9519	education	YES	11
586	Other disorders of the kidney and ureters	11	genitourinary	black	3804	35752	1.56e-08	0.399663	0.261	0.538	TRUE	586	7.80762	education	YES	11
591	Urinary tract infection	11	genitourinary	black	5681	31388	1.78e-25	0.6313	0.513	0.75	TRUE	591	24.7488	education	YES	11
250.1	Type 1 diabetes	3	endocrine/metabolic	brown	810	29511	3.13e-07	1.39188	0.859	1.925	TRUE	250.1	6.50414	median_income_subset	YES	11
250.42	Other abnormal glucose	3	endocrine/metabolic	brown	5582	29511	7.39e-20	1.00008	0.785	1.215	TRUE	250.42	19.1313	median_income_subset	YES	11
271	Disorders of carbohydrate transport and metabolism	3	endocrine/metabolic	brown	3899	41585	1.1e-54	2.14197	1.872	2.412	TRUE	271	53.9598	median_income_subset	YES	11
271.3	Intestinal disaccharidase deficiencies and disaccharide malabsorption	3	endocrine/metabolic	brown	3835	41585	3.82e-55	2.17483	1.902	2.447	TRUE	271.3	54.4177	median_income_subset	YES	11
276	Disorders of fluid, electrolyte, and acid-base balance	3	endocrine/metabolic	brown	5327	37548	6.12e-28	1.24542	1.023	1.468	TRUE	276	27.2135	median_income_subset	YES	11
276.1	Electrolyte imbalance	3	endocrine/metabolic	brown	4341	37548	9.6e-21	1.1441	0.904	1.384	TRUE	276.1	20.0178	median_income_subset	YES	11
411	Ischemic Heart Disease	8	circulatory system	red	6375	37728	2.25e-09	0.617272	0.415	0.82	TRUE	411	8.64799	median_income_subset	YES	11
586	Other disorders of the kidney and ureters	11	genitourinary	black	3804	36480	1.66e-13	0.93838	0.689	1.188	TRUE	586	12.7792	median_income_subset	YES	11
591	Urinary tract infection	11	genitourinary	black	5681	32116	1.35e-08	0.64281	0.421	0.865	TRUE	591	7.87116	median_income_subset	YES	11
250.1	Type 1 diabetes	3	endocrine/metabolic	brown	810	29511	1.29e-05	1.21178	0.667	1.756	TRUE	250.1	4.89039	high_school_education_subset	NO	11
250.42	Other abnormal glucose	3	endocrine/metabolic	brown	5582	29511	3e-11	0.802759	0.566	1.039	TRUE	250.42	10.5228	high_school_education_subset	YES	11
271	Disorders of carbohydrate transport and metabolism	3	endocrine/metabolic	brown	3899	41585	4.17e-27	1.36751	1.119	1.616	TRUE	271	26.3796	high_school_education_subset	YES	11
271.3	Intestinal disaccharidase deficiencies and disaccharide malabsorption	3	endocrine/metabolic	brown	3835	41585	5.57e-28	1.39863	1.149	1.649	TRUE	271.3	27.2538	high_school_education_subset	YES	11
276	Disorders of fluid, electrolyte, and acid-base balance	3	endocrine/metabolic	brown	5327	37548	0.413636	0.101745	-0.142	0.346	TRUE	276	0.383381	high_school_education_subset	NO	11
276.1	Electrolyte imbalance	3	endocrine/metabolic	brown	4341	37548	0.503726	0.0907727	-0.175	0.357	TRUE	276.1	0.297806	high_school_education_subset	NO	11
411	Ischemic Heart Disease	8	circulatory system	red	6375	37728	0.000153	0.452501	0.218	0.687	TRUE	411	3.81536	high_school_education_subset	NO	11
586	Other disorders of the kidney and ureters	11	genitourinary	black	3804	36480	5.55e-07	0.70686	0.43	0.984	TRUE	586	6.25546	high_school_education_subset	YES	11
591	Urinary tract infection	11	genitourinary	black	5681	32116	2.51e-10	0.784635	0.542	1.028	TRUE	591	9.60028	high_school_education_subset	YES	11
250.1	Type 1 diabetes	3	endocrine/metabolic	brown	810	29511	4.76e-09	1.48962	0.991	1.988	TRUE	250.1	8.32258	assited_income_subset	YES	11
250.42	Other abnormal glucose	3	endocrine/metabolic	brown	5582	29511	2.64e-18	1.00009	0.775	1.225	TRUE	250.42	17.5789	assited_income_subset	YES	11
271	Disorders of carbohydrate transport and metabolism	3	endocrine/metabolic	brown	3899	41585	7.34e-36	1.46865	1.238	1.699	TRUE	271	35.1343	assited_income_subset	YES	11
271.3	Intestinal disaccharidase deficiencies and disaccharide malabsorption	3	endocrine/metabolic	brown	3835	41585	1.34e-35	1.47349	1.242	1.705	TRUE	271.3	34.8728	assited_income_subset	YES	11
276	Disorders of fluid, electrolyte, and acid-base balance	3	endocrine/metabolic	brown	5327	37548	8.22e-10	0.70416	0.479	0.929	TRUE	276	9.0851	assited_income_subset	YES	11
276.1	Electrolyte imbalance	3	endocrine/metabolic	brown	4341	37548	2.54e-08	0.69483	0.45	0.939	TRUE	276.1	7.59563	assited_income_subset	YES	11
411	Ischemic Heart Disease	8	circulatory system	red	6375	37728	2.17e-09	0.687475	0.462	0.913	TRUE	411	8.66271	assited_income_subset	YES	11
586	Other disorders of the kidney and ureters	11	genitourinary	black	3804	36480	1.15e-18	1.17718	0.916	1.439	TRUE	586	17.9384	assited_income_subset	YES	11
591	Urinary tract infection	11	genitourinary	black	5681	32116	2.6e-15	0.913377	0.687	1.14	TRUE	591	14.5845	assited_income_subset	YES	11
250.1	Type 1 diabetes	3	endocrine/metabolic	brown	810	29511	5.64e-06	1.21693	0.692	1.742	TRUE	250.1	5.24888	no_health_insurance_subset	YES	11
250.42	Other abnormal glucose	3	endocrine/metabolic	brown	5582	29511	8.84e-12	0.794058	0.566	1.022	TRUE	250.42	11.0537	no_health_insurance_subset	YES	11
271	Disorders of carbohydrate transport and metabolism	3	endocrine/metabolic	brown	3899	41585	4.29e-33	1.44977	1.213	1.687	TRUE	271	32.3676	no_health_insurance_subset	YES	11
271.3	Intestinal disaccharidase deficiencies and disaccharide malabsorption	3	endocrine/metabolic	brown	3835	41585	3.94e-33	1.45984	1.221	1.698	TRUE	271.3	32.4044	no_health_insurance_subset	YES	11
276	Disorders of fluid, electrolyte, and acid-base balance	3	endocrine/metabolic	brown	5327	37548	0.000495	0.414714	0.181	0.648	TRUE	276	3.30539	no_health_insurance_subset	NO	11
276.1	Electrolyte imbalance	3	endocrine/metabolic	brown	4341	37548	0.00411811	0.372118	0.118	0.626	TRUE	276.1	2.3853	no_health_insurance_subset	NO	11
411	Ischemic Heart Disease	8	circulatory system	red	6375	37728	5.21e-07	0.573369	0.349	0.797	TRUE	411	6.28337	no_health_insurance_subset	YES	11
586	Other disorders of the kidney and ureters	11	genitourinary	black	3804	36480	1.22e-05	0.598405	0.33	0.867	TRUE	586	4.9151	no_health_insurance_subset	NO	11
591	Urinary tract infection	11	genitourinary	black	5681	32116	0.0137312	0.298848	0.061	0.537	TRUE	591	1.86229	no_health_insurance_subset	NO	11
250.1	Type 1 diabetes	3	endocrine/metabolic	brown	810	29511	8.86e-07	1.55224	0.933	2.171	TRUE	250.1	6.05272	area_poverty_subset	YES	11
250.42	Other abnormal glucose	3	endocrine/metabolic	brown	5582	29511	3.34e-17	1.14445	0.878	1.41	TRUE	250.42	16.4768	area_poverty_subset	YES	11
271	Disorders of carbohydrate transport and metabolism	3	endocrine/metabolic	brown	3899	41585	8.85e-60	2.31603	2.038	2.594	TRUE	271	59.053	area_poverty_subset	YES	11
271.3	Intestinal disaccharidase deficiencies and disaccharide malabsorption	3	endocrine/metabolic	brown	3835	41585	4.01e-60	2.33885	2.059	2.619	TRUE	271.3	59.3964	area_poverty_subset	YES	11
276	Disorders of fluid, electrolyte, and acid-base balance	3	endocrine/metabolic	brown	5327	37548	2.34e-12	0.952739	0.686	1.219	TRUE	276	11.6308	area_poverty_subset	YES	11
276.1	Electrolyte imbalance	3	endocrine/metabolic	brown	4341	37548	1.88e-09	0.88886	0.599	1.179	TRUE	276.1	8.72559	area_poverty_subset	YES	11
411	Ischemic Heart Disease	8	circulatory system	red	6375	37728	0.000143	0.514645	0.249	0.78	TRUE	411	3.8442	area_poverty_subset	NO	11
586	Other disorders of the kidney and ureters	11	genitourinary	black	3804	36480	8.33e-09	0.926056	0.611	1.241	TRUE	586	8.07952	area_poverty_subset	YES	11
591	Urinary tract infection	11	genitourinary	black	5681	32116	3.59e-09	0.815999	0.545	1.087	TRUE	591	8.44497	area_poverty_subset	YES	11
250.1	Type 1 diabetes	3	endocrine/metabolic	brown	810	29511	4.62e-07	1.51321	0.925	2.102	TRUE	250.1	6.33517	vacant_housing_subset	YES	11
250.42	Other abnormal glucose	3	endocrine/metabolic	brown	5582	29511	0.00023	0.538286	0.252	0.825	TRUE	250.42	3.63808	vacant_housing_subset	NO	11
271	Disorders of carbohydrate transport and metabolism	3	endocrine/metabolic	brown	3899	41585	0.000202	0.587754	0.278	0.898	TRUE	271	3.69482	vacant_housing_subset	NO	11
271.3	Intestinal disaccharidase deficiencies and disaccharide malabsorption	3	endocrine/metabolic	brown	3835	41585	0.000247	0.583817	0.272	0.896	TRUE	271.3	3.60651	vacant_housing_subset	NO	11
276	Disorders of fluid, electrolyte, and acid-base balance	3	endocrine/metabolic	brown	5327	37548	1.72e-18	1.24097	0.964	1.518	TRUE	276	17.7646	vacant_housing_subset	YES	11
276.1	Electrolyte imbalance	3	endocrine/metabolic	brown	4341	37548	1.26e-15	1.21592	0.918	1.514	TRUE	276.1	14.9011	vacant_housing_subset	YES	11
411	Ischemic Heart Disease	8	circulatory system	red	6375	37728	3.92e-16	1.13914	0.865	1.413	TRUE	411	15.4073	vacant_housing_subset	YES	11
586	Other disorders of the kidney and ureters	11	genitourinary	black	3804	36480	1.14e-10	1.05363	0.733	1.374	TRUE	586	9.94444	vacant_housing_subset	YES	11
591	Urinary tract infection	11	genitourinary	black	5681	32116	1.02e-05	0.677203	0.376	0.978	TRUE	591	4.99136	vacant_housing_subset	NO	11
250.1	Type 1 diabetes	3	endocrine/metabolic	brown	810	29511	8.79e-10	1.74027	1.184	2.297	TRUE	250.1	9.05595	deprivation_index_subset	YES	11
250.42	Other abnormal glucose	3	endocrine/metabolic	brown	5582	29511	2.52e-21	1.15317	0.915	1.392	TRUE	250.42	20.5994	deprivation_index_subset	YES	11
271	Disorders of carbohydrate transport and metabolism	3	endocrine/metabolic	brown	3899	41585	2.39e-56	2.06297	1.807	2.319	TRUE	271	55.6211	deprivation_index_subset	YES	11
271.3	Intestinal disaccharidase deficiencies and disaccharide malabsorption	3	endocrine/metabolic	brown	3835	41585	1.03e-56	2.08459	1.827	2.342	TRUE	271.3	55.9861	deprivation_index_subset	YES	11
276	Disorders of fluid, electrolyte, and acid-base balance	3	endocrine/metabolic	brown	5327	37548	1.44e-14	0.935799	0.697	1.174	TRUE	276	13.8414	deprivation_index_subset	YES	11
276.1	Electrolyte imbalance	3	endocrine/metabolic	brown	4341	37548	2.6e-11	0.881734	0.623	1.141	TRUE	276.1	10.5846	deprivation_index_subset	YES	11
411	Ischemic Heart Disease	8	circulatory system	red	6375	37728	1.32e-10	0.766274	0.533	1	TRUE	411	9.88026	deprivation_index_subset	YES	11
586	Other disorders of the kidney and ureters	11	genitourinary	black	3804	36480	5.35e-15	1.11281	0.834	1.392	TRUE	586	14.2719	deprivation_index_subset	YES	11
591	Urinary tract infection	11	genitourinary	black	5681	32116	1.07e-11	0.846315	0.602	1.09	TRUE	591	10.9695	deprivation_index_subset	YES	11
216	Benign neoplasm of skin	2	neoplasms	darkcyan	9145	32127	6.7e-117	-2.03281	-2.206	-1.859	TRUE	216	116.174	SDOH	YES	10
250.25	Diabetes type 2 with peripheral circulatory disorders	3	endocrine/metabolic	brown	718	29511	1.16e-30	2.47595	2.054	2.898	TRUE	250.25	29.9368	SDOH	YES	10
276.5	Hypovolemia	3	endocrine/metabolic	brown	1228	37548	3.51e-26	1.74617	1.423	2.07	TRUE	276.5	25.4543	SDOH	YES	10
456	Chronic venous insufficiency [CVI]	8	circulatory system	red	1527	30247	1.25e-05	0.722057	0.398	1.046	TRUE	456	4.90328	SDOH	NO	10
495	Asthma	9	respiratory	coral4	7784	32082	1.35e-39	1.01065	0.86	1.161	TRUE	495	38.869	SDOH	YES	10
496.1	Emphysema	9	respiratory	coral4	855	32082	9.62e-64	3.03467	2.682	3.388	TRUE	496.1	63.0167	SDOH	YES	10
509	Respiratory failure, insufficiency, arrest	9	respiratory	coral4	1065	40896	1.93e-29	1.92532	1.59	2.26	TRUE	509	28.7142	SDOH	YES	10
596.5	Functional disorders of bladder	11	genitourinary	black	1540	42008	4.06e-06	0.701174	0.403	0.999	TRUE	596.5	5.39196	SDOH	YES	10
599.4	Urinary incontinence	11	genitourinary	black	3592	27827	7.02e-16	0.914185	0.692	1.136	TRUE	599.4	15.1534	SDOH	YES	10
611	Abnormal findings on mammogram or breast exam	11	genitourinary	black	7873	33065	2.23e-08	-0.507592	-0.685	-0.33	TRUE	611	7.65157	SDOH	YES	10
611.1	Abnormal mammogram	11	genitourinary	black	6218	33065	1.65e-06	-0.474684	-0.669	-0.281	TRUE	611.1	5.78188	SDOH	YES	10
216	Benign neoplasm of skin	2	neoplasms	darkcyan	9145	32127	6.91e-77	-1.97751	-2.186	-1.769	TRUE	216	76.1603	SCC	YES	10
250.25	Diabetes type 2 with peripheral circulatory disorders	3	endocrine/metabolic	brown	718	29511	1.38e-08	1.7921	1.173	2.411	TRUE	250.25	7.8612	SCC	YES	10
276.5	Hypovolemia	3	endocrine/metabolic	brown	1228	37548	1.78e-18	2.00392	1.556	2.452	TRUE	276.5	17.7503	SCC	YES	10
456	Chronic venous insufficiency [CVI]	8	circulatory system	red	1527	30247	0.0189463	0.536057	0.088	0.984	TRUE	456	1.72248	SCC	NO	10
495	Asthma	9	respiratory	coral4	7784	32082	5.7e-61	1.68369	1.483	1.884	TRUE	495	60.2442	SCC	YES	10
496.1	Emphysema	9	respiratory	coral4	855	32082	8.69e-16	2.26299	1.712	2.814	TRUE	496.1	15.0612	SCC	YES	10
509	Respiratory failure, insufficiency, arrest	9	respiratory	coral4	1065	40896	1.38e-11	1.67649	1.19	2.163	TRUE	509	10.8612	SCC	YES	10
596.5	Functional disorders of bladder	11	genitourinary	black	1540	42008	4.57e-12	1.41898	1.017	1.821	TRUE	596.5	11.3397	SCC	YES	10
599.4	Urinary incontinence	11	genitourinary	black	3592	27827	8.58e-29	1.69746	1.399	1.996	TRUE	599.4	28.0666	SCC	YES	10
611	Abnormal findings on mammogram or breast exam	11	genitourinary	black	7873	33065	5.46e-09	-0.698082	-0.933	-0.464	TRUE	611	8.26317	SCC	YES	10
611.1	Abnormal mammogram	11	genitourinary	black	6218	33065	2.12e-10	-0.836621	-1.095	-0.578	TRUE	611.1	9.67357	SCC	YES	10
216	Benign neoplasm of skin	2	neoplasms	darkcyan	9145	32127	2.73e-22	-0.825802	-0.992	-0.659	TRUE	216	21.5646	NBD	YES	10
250.25	Diabetes type 2 with peripheral circulatory disorders	3	endocrine/metabolic	brown	718	29511	3.16e-09	1.45083	0.971	1.931	TRUE	250.25	8.50005	NBD	YES	10
276.5	Hypovolemia	3	endocrine/metabolic	brown	1228	37548	6.67e-20	1.61498	1.268	1.962	TRUE	276.5	19.1756	NBD	YES	10
456	Chronic venous insufficiency [CVI]	8	circulatory system	red	1527	30247	7.75e-10	1.07323	0.731	1.415	TRUE	456	9.11069	NBD	YES	10
495	Asthma	9	respiratory	coral4	7784	32082	2.4e-25	0.847614	0.688	1.007	TRUE	495	24.62	NBD	YES	10
496.1	Emphysema	9	respiratory	coral4	855	32082	3.61e-16	1.74035	1.322	2.159	TRUE	496.1	15.4429	NBD	YES	10
509	Respiratory failure, insufficiency, arrest	9	respiratory	coral4	1065	40896	2.73e-13	1.40028	1.025	1.776	TRUE	509	12.5633	NBD	YES	10
596.5	Functional disorders of bladder	11	genitourinary	black	1540	42008	0.000371	0.592673	0.266	0.919	TRUE	596.5	3.43095	NBD	NO	10
599.4	Urinary incontinence	11	genitourinary	black	3592	27827	3.29e-15	0.957622	0.719	1.196	TRUE	599.4	14.483	NBD	YES	10
611	Abnormal findings on mammogram or breast exam	11	genitourinary	black	7873	33065	0.601956	0.0493361	-0.136	0.235	TRUE	611	0.220435	NBD	NO	10
611.1	Abnormal mammogram	11	genitourinary	black	6218	33065	0.114349	0.162837	-0.039	0.365	TRUE	611.1	0.941769	NBD	NO	10
216	Benign neoplasm of skin	2	neoplasms	darkcyan	9145	32127	2.49e-192	-2.81433	-3.001	-2.628	TRUE	216	191.604	ES	YES	10
250.25	Diabetes type 2 with peripheral circulatory disorders	3	endocrine/metabolic	brown	718	29511	6.46e-36	2.72248	2.296	3.149	TRUE	250.25	35.1895	ES	YES	10
276.5	Hypovolemia	3	endocrine/metabolic	brown	1228	37548	4.37e-57	2.43038	2.131	2.73	TRUE	276.5	56.3598	ES	YES	10
456	Chronic venous insufficiency [CVI]	8	circulatory system	red	1527	30247	1.17e-13	1.22734	0.903	1.552	TRUE	456	12.931	ES	YES	10
495	Asthma	9	respiratory	coral4	7784	32082	6.76e-94	1.51532	1.371	1.66	TRUE	495	93.1701	ES	YES	10
496.1	Emphysema	9	respiratory	coral4	855	32082	7.63e-56	3.04803	2.669	3.427	TRUE	496.1	55.1174	ES	YES	10
509	Respiratory failure, insufficiency, arrest	9	respiratory	coral4	1065	40896	1.84e-46	2.40796	2.078	2.738	TRUE	509	45.7342	ES	YES	10
596.5	Functional disorders of bladder	11	genitourinary	black	1540	42008	7.94e-23	1.41917	1.136	1.702	TRUE	596.5	22.1001	ES	YES	10
599.4	Urinary incontinence	11	genitourinary	black	3592	27827	7.02e-53	1.68132	1.466	1.897	TRUE	599.4	52.1538	ES	YES	10
611	Abnormal findings on mammogram or breast exam	11	genitourinary	black	7873	33065	1.42e-31	-1.06875	-1.248	-0.89	TRUE	611	30.8473	ES	YES	10
611.1	Abnormal mammogram	11	genitourinary	black	6218	33065	1.62e-29	-1.14431	-1.343	-0.946	TRUE	611.1	28.7901	ES	YES	10
216	Benign neoplasm of skin	2	neoplasms	darkcyan	9145	32127	1.29e-82	-1.98028	-2.182	-1.779	TRUE	216	81.8899	HCAU	YES	10
250.25	Diabetes type 2 with peripheral circulatory disorders	3	endocrine/metabolic	brown	718	29511	1.21e-19	2.68506	2.105	3.265	TRUE	250.25	18.9185	HCAU	YES	10
276.5	Hypovolemia	3	endocrine/metabolic	brown	1228	37548	1.07e-23	2.18437	1.758	2.611	TRUE	276.5	22.9716	HCAU	YES	10
456	Chronic venous insufficiency [CVI]	8	circulatory system	red	1527	30247	4.17e-07	1.09799	0.673	1.523	TRUE	456	6.37969	HCAU	YES	10
495	Asthma	9	respiratory	coral4	7784	32082	3.68e-88	1.89751	1.711	2.084	TRUE	495	87.4339	HCAU	YES	10
496.1	Emphysema	9	respiratory	coral4	855	32082	4.48e-19	2.39354	1.868	2.919	TRUE	496.1	18.3489	HCAU	YES	10
509	Respiratory failure, insufficiency, arrest	9	respiratory	coral4	1065	40896	7.83e-19	2.09233	1.63	2.555	TRUE	509	18.1065	HCAU	YES	10
596.5	Functional disorders of bladder	11	genitourinary	black	1540	42008	1.45e-13	1.44135	1.059	1.824	TRUE	596.5	12.8377	HCAU	YES	10
599.4	Urinary incontinence	11	genitourinary	black	3592	27827	2.76e-36	1.8003	1.52	2.081	TRUE	599.4	35.5592	HCAU	YES	10
611	Abnormal findings on mammogram or breast exam	11	genitourinary	black	7873	33065	1.55e-14	-0.850356	-1.067	-0.633	TRUE	611	13.8101	HCAU	YES	10
611.1	Abnormal mammogram	11	genitourinary	black	6218	33065	2.18e-15	-0.967585	-1.207	-0.728	TRUE	611.1	14.6615	HCAU	YES	10
216	Benign neoplasm of skin	2	neoplasms	darkcyan	9145	31399	1.95e-242	-1.84362	-1.952	-1.735	TRUE	216	241.709	education	YES	10
250.25	Diabetes type 2 with peripheral circulatory disorders	3	endocrine/metabolic	brown	718	28783	7.24e-49	2.15189	1.865	2.439	TRUE	250.25	48.14	education	YES	10
276.5	Hypovolemia	3	endocrine/metabolic	brown	1228	36820	6.11e-33	1.35554	1.133	1.578	TRUE	276.5	32.2142	education	YES	10
456	Chronic venous insufficiency [CVI]	8	circulatory system	red	1527	29519	5.66e-09	0.621887	0.413	0.831	TRUE	456	8.24708	education	YES	10
495	Asthma	9	respiratory	coral4	7784	31354	4.42e-31	0.587474	0.488	0.687	TRUE	495	30.3543	education	YES	10
496.1	Emphysema	9	respiratory	coral4	855	31354	5.43e-74	2.32617	2.076	2.577	TRUE	496.1	73.265	education	YES	10
509	Respiratory failure, insufficiency, arrest	9	respiratory	coral4	1065	40168	1.27e-41	1.59617	1.365	1.828	TRUE	509	40.8974	education	YES	10
596.5	Functional disorders of bladder	11	genitourinary	black	1540	41280	1.78e-11	0.66762	0.473	0.862	TRUE	596.5	10.7507	education	YES	10
599.4	Urinary incontinence	11	genitourinary	black	3592	27099	6.32e-20	0.673055	0.529	0.817	TRUE	599.4	19.1994	education	YES	10
611	Abnormal findings on mammogram or breast exam	11	genitourinary	black	7873	32337	1.6e-21	-0.556492	-0.671	-0.442	TRUE	611	20.7971	education	YES	10
611.1	Abnormal mammogram	11	genitourinary	black	6218	32337	2.65e-17	-0.539285	-0.664	-0.414	TRUE	611.1	16.577	education	YES	10
216	Benign neoplasm of skin	2	neoplasms	darkcyan	9145	32127	1.2e-38	-1.0766	-1.239	-0.914	TRUE	216	37.9224	median_income_subset	YES	10
250.25	Diabetes type 2 with peripheral circulatory disorders	3	endocrine/metabolic	brown	718	29511	7.25e-12	2.01982	1.442	2.598	TRUE	250.25	11.1397	median_income_subset	YES	10
276.5	Hypovolemia	3	endocrine/metabolic	brown	1228	37548	4.11e-14	1.75783	1.302	2.214	TRUE	276.5	13.3864	median_income_subset	YES	10
456	Chronic venous insufficiency [CVI]	8	circulatory system	red	1527	30247	2.03e-06	0.924732	0.543	1.306	TRUE	456	5.69327	median_income_subset	YES	10
495	Asthma	9	respiratory	coral4	7784	32082	1.07e-15	0.768991	0.581	0.957	TRUE	495	14.969	median_income_subset	YES	10
496.1	Emphysema	9	respiratory	coral4	855	32082	1.25e-16	2.31921	1.77	2.868	TRUE	496.1	15.9039	median_income_subset	YES	10
509	Respiratory failure, insufficiency, arrest	9	respiratory	coral4	1065	40896	3.23e-09	1.41618	0.947	1.885	TRUE	509	8.49081	median_income_subset	YES	10
596.5	Functional disorders of bladder	11	genitourinary	black	1540	42008	5.14e-06	0.867148	0.494	1.24	TRUE	596.5	5.28942	median_income_subset	YES	10
599.4	Urinary incontinence	11	genitourinary	black	3592	27827	1.2e-25	1.50806	1.226	1.79	TRUE	599.4	24.9194	median_income_subset	YES	10
611	Abnormal findings on mammogram or breast exam	11	genitourinary	black	7873	33065	0.495696	-0.0725728	-0.281	0.136	TRUE	611	0.304784	median_income_subset	NO	10
611.1	Abnormal mammogram	11	genitourinary	black	6218	33065	0.328311	0.114542	-0.115	0.344	TRUE	611.1	0.483714	median_income_subset	NO	10
216	Benign neoplasm of skin	2	neoplasms	darkcyan	9145	32127	0.553853	-0.0600252	-0.259	0.139	TRUE	216	0.256605	high_school_education_subset	NO	10
250.25	Diabetes type 2 with peripheral circulatory disorders	3	endocrine/metabolic	brown	718	29511	0.00232363	0.923329	0.329	1.518	TRUE	250.25	2.63383	high_school_education_subset	NO	10
276.5	Hypovolemia	3	endocrine/metabolic	brown	1228	37548	0.265219	0.26695	-0.203	0.737	TRUE	276.5	0.576395	high_school_education_subset	NO	10
456	Chronic venous insufficiency [CVI]	8	circulatory system	red	1527	30247	1.81e-06	1.02974	0.607	1.453	TRUE	456	5.74171	high_school_education_subset	YES	10
495	Asthma	9	respiratory	coral4	7784	32082	0.748251	0.033614	-0.172	0.239	TRUE	495	0.125952	high_school_education_subset	NO	10
496.1	Emphysema	9	respiratory	coral4	855	32082	1.98e-05	1.12385	0.608	1.64	TRUE	496.1	4.70315	high_school_education_subset	NO	10
509	Respiratory failure, insufficiency, arrest	9	respiratory	coral4	1065	40896	0.000117	0.93486	0.459	1.41	TRUE	509	3.93338	high_school_education_subset	NO	10
596.5	Functional disorders of bladder	11	genitourinary	black	1540	42008	4.25e-06	0.92156	0.529	1.314	TRUE	596.5	5.37194	high_school_education_subset	YES	10
599.4	Urinary incontinence	11	genitourinary	black	3592	27827	0.0160069	0.370472	0.069	0.672	TRUE	599.4	1.79569	high_school_education_subset	NO	10
611	Abnormal findings on mammogram or breast exam	11	genitourinary	black	7873	33065	2.32e-15	0.935435	0.704	1.167	TRUE	611	14.6342	high_school_education_subset	YES	10
611.1	Abnormal mammogram	11	genitourinary	black	6218	33065	1.16e-24	1.31668	1.065	1.568	TRUE	611.1	23.9363	high_school_education_subset	YES	10
216	Benign neoplasm of skin	2	neoplasms	darkcyan	9145	32127	0.557238	-0.056934	-0.247	0.133	TRUE	216	0.25396	assited_income_subset	NO	10
250.25	Diabetes type 2 with peripheral circulatory disorders	3	endocrine/metabolic	brown	718	29511	3.36e-11	1.78058	1.254	2.307	TRUE	250.25	10.4736	assited_income_subset	YES	10
276.5	Hypovolemia	3	endocrine/metabolic	brown	1228	37548	0.00358179	0.642881	0.21	1.075	TRUE	276.5	2.4459	assited_income_subset	NO	10
456	Chronic venous insufficiency [CVI]	8	circulatory system	red	1527	30247	1.82e-08	1.13752	0.741	1.534	TRUE	456	7.73898	assited_income_subset	YES	10
495	Asthma	9	respiratory	coral4	7784	32082	5.83e-06	0.445874	0.253	0.639	TRUE	495	5.234	assited_income_subset	YES	10
496.1	Emphysema	9	respiratory	coral4	855	32082	3.29e-10	1.50739	1.037	1.977	TRUE	496.1	9.48327	assited_income_subset	YES	10
509	Respiratory failure, insufficiency, arrest	9	respiratory	coral4	1065	40896	0.0457951	0.476385	0.009	0.944	TRUE	509	1.33918	assited_income_subset	NO	10
596.5	Functional disorders of bladder	11	genitourinary	black	1540	42008	3.27e-06	0.863939	0.5	1.228	TRUE	596.5	5.48568	assited_income_subset	YES	10
599.4	Urinary incontinence	11	genitourinary	black	3592	27827	1.44e-06	0.684636	0.406	0.963	TRUE	599.4	5.84175	assited_income_subset	YES	10
611	Abnormal findings on mammogram or breast exam	11	genitourinary	black	7873	33065	1.49e-15	0.882053	0.665	1.099	TRUE	611	14.8257	assited_income_subset	YES	10
611.1	Abnormal mammogram	11	genitourinary	black	6218	33065	4.38e-24	1.20804	0.974	1.442	TRUE	611.1	23.3589	assited_income_subset	YES	10
216	Benign neoplasm of skin	2	neoplasms	darkcyan	9145	32127	5.83e-13	-0.726475	-0.924	-0.529	TRUE	216	12.2342	no_health_insurance_subset	YES	10
250.25	Diabetes type 2 with peripheral circulatory disorders	3	endocrine/metabolic	brown	718	29511	0.0081273	0.770403	0.2	1.341	TRUE	250.25	2.09005	no_health_insurance_subset	NO	10
276.5	Hypovolemia	3	endocrine/metabolic	brown	1228	37548	2.05e-05	0.960357	0.518	1.402	TRUE	276.5	4.68805	no_health_insurance_subset	NO	10
456	Chronic venous insufficiency [CVI]	8	circulatory system	red	1527	30247	2.02e-06	1	0.588	1.412	TRUE	456	5.69492	no_health_insurance_subset	YES	10
495	Asthma	9	respiratory	coral4	7784	32082	0.257236	0.114327	-0.083	0.312	TRUE	495	0.589668	no_health_insurance_subset	NO	10
496.1	Emphysema	9	respiratory	coral4	855	32082	0.0106321	0.671215	0.156	1.186	TRUE	496.1	1.97338	no_health_insurance_subset	NO	10
509	Respiratory failure, insufficiency, arrest	9	respiratory	coral4	1065	40896	1.59e-12	1.6093	1.163	2.056	TRUE	509	11.7984	no_health_insurance_subset	YES	10
596.5	Functional disorders of bladder	11	genitourinary	black	1540	42008	0.000542	0.684802	0.297	1.073	TRUE	596.5	3.26603	no_health_insurance_subset	NO	10
599.4	Urinary incontinence	11	genitourinary	black	3592	27827	0.00130073	0.466494	0.182	0.751	TRUE	599.4	2.88581	no_health_insurance_subset	NO	10
611	Abnormal findings on mammogram or breast exam	11	genitourinary	black	7873	33065	2.43e-13	0.832887	0.61	1.056	TRUE	611	12.6149	no_health_insurance_subset	YES	10
611.1	Abnormal mammogram	11	genitourinary	black	6218	33065	2.69e-23	1.2316	0.989	1.474	TRUE	611.1	22.5698	no_health_insurance_subset	YES	10
216	Benign neoplasm of skin	2	neoplasms	darkcyan	9145	32127	0.80845	-0.0273606	-0.249	0.194	TRUE	216	0.0923468	area_poverty_subset	NO	10
250.25	Diabetes type 2 with peripheral circulatory disorders	3	endocrine/metabolic	brown	718	29511	2.27e-07	1.73128	1.076	2.387	TRUE	250.25	6.64338	area_poverty_subset	YES	10
276.5	Hypovolemia	3	endocrine/metabolic	brown	1228	37548	4.72e-07	1.29898	0.794	1.804	TRUE	276.5	6.32608	area_poverty_subset	YES	10
456	Chronic venous insufficiency [CVI]	8	circulatory system	red	1527	30247	4.42e-07	1.22508	0.75	1.701	TRUE	456	6.35414	area_poverty_subset	YES	10
495	Asthma	9	respiratory	coral4	7784	32082	0.00463149	0.331857	0.102	0.562	TRUE	495	2.33428	area_poverty_subset	NO	10
496.1	Emphysema	9	respiratory	coral4	855	32082	8.29e-06	1.34177	0.752	1.932	TRUE	496.1	5.0815	area_poverty_subset	NO	10
509	Respiratory failure, insufficiency, arrest	9	respiratory	coral4	1065	40896	9.53e-06	1.21134	0.675	1.748	TRUE	509	5.02101	area_poverty_subset	NO	10
596.5	Functional disorders of bladder	11	genitourinary	black	1540	42008	1.96e-05	0.957959	0.518	1.398	TRUE	596.5	4.70759	area_poverty_subset	NO	10
599.4	Urinary incontinence	11	genitourinary	black	3592	27827	3.22e-10	1.05419	0.726	1.383	TRUE	599.4	9.49227	area_poverty_subset	YES	10
611	Abnormal findings on mammogram or breast exam	11	genitourinary	black	7873	33065	4.49e-07	0.661075	0.404	0.918	TRUE	611	6.34747	area_poverty_subset	YES	10
611.1	Abnormal mammogram	11	genitourinary	black	6218	33065	6.63e-13	1.02489	0.745	1.304	TRUE	611.1	12.1787	area_poverty_subset	YES	10
216	Benign neoplasm of skin	2	neoplasms	darkcyan	9145	32127	7.81e-27	-1.45558	-1.722	-1.19	TRUE	216	26.1074	vacant_housing_subset	YES	10
250.25	Diabetes type 2 with peripheral circulatory disorders	3	endocrine/metabolic	brown	718	29511	1.03e-05	1.36177	0.757	1.967	TRUE	250.25	4.98544	vacant_housing_subset	NO	10
276.5	Hypovolemia	3	endocrine/metabolic	brown	1228	37548	6.85e-10	1.5898	1.085	2.095	TRUE	276.5	9.16414	vacant_housing_subset	YES	10
456	Chronic venous insufficiency [CVI]	8	circulatory system	red	1527	30247	0.01213	0.624545	0.137	1.113	TRUE	456	1.91614	vacant_housing_subset	NO	10
495	Asthma	9	respiratory	coral4	7784	32082	7.32e-10	0.78435	0.535	1.034	TRUE	495	9.13522	vacant_housing_subset	YES	10
496.1	Emphysema	9	respiratory	coral4	855	32082	1.83e-10	1.78791	1.238	2.338	TRUE	496.1	9.73734	vacant_housing_subset	YES	10
509	Respiratory failure, insufficiency, arrest	9	respiratory	coral4	1065	40896	3.68e-12	1.8221	1.308	2.336	TRUE	509	11.4337	vacant_housing_subset	YES	10
596.5	Functional disorders of bladder	11	genitourinary	black	1540	42008	7.31e-06	1.03399	0.582	1.486	TRUE	596.5	5.13627	vacant_housing_subset	YES	10
599.4	Urinary incontinence	11	genitourinary	black	3592	27827	2.05e-05	0.753788	0.407	1.101	TRUE	599.4	4.68887	vacant_housing_subset	NO	10
611	Abnormal findings on mammogram or breast exam	11	genitourinary	black	7873	33065	0.866702	0.0249724	-0.267	0.317	TRUE	611	0.0621304	vacant_housing_subset	NO	10
611.1	Abnormal mammogram	11	genitourinary	black	6218	33065	0.00392156	0.460489	0.148	0.773	TRUE	611.1	2.40654	vacant_housing_subset	NO	10
216	Benign neoplasm of skin	2	neoplasms	darkcyan	9145	32127	8.16e-11	-0.657084	-0.855	-0.459	TRUE	216	10.0885	deprivation_index_subset	YES	10
250.25	Diabetes type 2 with peripheral circulatory disorders	3	endocrine/metabolic	brown	718	29511	6.54e-10	1.85607	1.267	2.445	TRUE	250.25	9.18424	deprivation_index_subset	YES	10
276.5	Hypovolemia	3	endocrine/metabolic	brown	1228	37548	2.56e-08	1.29792	0.841	1.755	TRUE	276.5	7.59225	deprivation_index_subset	YES	10
456	Chronic venous insufficiency [CVI]	8	circulatory system	red	1527	30247	4.42e-09	1.27618	0.85	1.702	TRUE	456	8.35435	deprivation_index_subset	YES	10
495	Asthma	9	respiratory	coral4	7784	32082	2.48e-06	0.491057	0.287	0.695	TRUE	495	5.60605	deprivation_index_subset	YES	10
496.1	Emphysema	9	respiratory	coral4	855	32082	1.9e-11	1.79464	1.271	2.319	TRUE	496.1	10.7212	deprivation_index_subset	YES	10
509	Respiratory failure, insufficiency, arrest	9	respiratory	coral4	1065	40896	2.22e-09	1.46524	0.985	1.945	TRUE	509	8.65459	deprivation_index_subset	YES	10
596.5	Functional disorders of bladder	11	genitourinary	black	1540	42008	1.22e-07	1.07153	0.675	1.468	TRUE	596.5	6.91539	deprivation_index_subset	YES	10
599.4	Urinary incontinence	11	genitourinary	black	3592	27827	3.5e-12	1.0484	0.753	1.344	TRUE	599.4	11.4565	deprivation_index_subset	YES	10
611	Abnormal findings on mammogram or breast exam	11	genitourinary	black	7873	33065	3.42e-09	0.701331	0.469	0.934	TRUE	611	8.46639	deprivation_index_subset	YES	10
611.1	Abnormal mammogram	11	genitourinary	black	6218	33065	1.01e-17	1.11074	0.857	1.365	TRUE	611.1	16.9959	deprivation_index_subset	YES	10
249	Secondary diabetes mellitus	3	endocrine/metabolic	brown	501	29511	7.99e-15	2.02332	1.513	2.534	TRUE	249	14.0975	SDOH	YES	9
250.4	Abnormal glucose	3	endocrine/metabolic	brown	8566	29511	7.21e-17	0.682005	0.522	0.842	TRUE	250.4	16.1423	SDOH	YES	9
250.7	Diabetic retinopathy	3	endocrine/metabolic	brown	547	37194	1.98e-13	1.77612	1.302	2.25	TRUE	250.7	12.7031	SDOH	YES	9
261.2	Vitamin B-complex deficiencies	3	endocrine/metabolic	brown	3083	30089	1.57e-06	0.548948	0.325	0.773	TRUE	261.2	5.80333	SDOH	YES	9
272	Disorders of lipoid metabolism	3	endocrine/metabolic	brown	24133	19731	3.81e-36	0.872214	0.736	1.008	TRUE	272	35.4194	SDOH	YES	9
272.1	Hyperlipidemia	3	endocrine/metabolic	brown	24048	19731	5.96e-36	0.870881	0.735	1.007	TRUE	272.1	35.2247	SDOH	YES	9
275.3	Disorders of magnesium metabolism	3	endocrine/metabolic	brown	726	42593	1.05e-19	1.80781	1.418	2.198	TRUE	275.3	18.9786	SDOH	YES	9
411.4	Coronary atherosclerosis	8	circulatory system	red	5415	37728	5.44e-25	1.01045	0.819	1.202	TRUE	411.4	24.2646	SDOH	YES	9
428.4	Heart failure with preserved EF [Diastolic heart failure]	8	circulatory system	red	973	39320	3.82e-21	1.76019	1.395	2.126	TRUE	428.4	20.4175	SDOH	YES	9
433	Cerebrovascular disease	8	circulatory system	red	3396	41932	1.2e-14	0.843575	0.629	1.058	TRUE	433	13.9204	SDOH	YES	9
443.9	Peripheral vascular disease, unspecified	8	circulatory system	red	1215	38510	2.93e-25	1.7567	1.425	2.088	TRUE	443.9	24.5335	SDOH	YES	9
496.2	Chronic bronchitis	9	respiratory	coral4	893	32082	7.67e-60	2.92381	2.573	3.275	TRUE	496.2	59.1155	SDOH	YES	9
585.33	Chronic Kidney Disease, Stage III	11	genitourinary	black	1633	36480	4.29e-09	0.954633	0.636	1.273	TRUE	585.33	8.3673	SDOH	YES	9
588	Disorders resulting from impaired renal function	11	genitourinary	black	484	36480	1.94e-11	1.73568	1.229	2.243	TRUE	588	10.712	SDOH	YES	9
588.2	Secondary hyperparathyroidism (of renal origin)	11	genitourinary	black	403	36480	3.47e-12	1.93009	1.386	2.474	TRUE	588.2	11.4595	SDOH	YES	9
599	Other symptoms/disorders or the urinary system	11	genitourinary	black	12446	27827	1.1e-17	0.596036	0.46	0.732	TRUE	599	16.9592	SDOH	YES	9
249	Secondary diabetes mellitus	3	endocrine/metabolic	brown	501	29511	0.0141926	0.933829	0.187	1.68	TRUE	249	1.84794	SCC	NO	9
250.4	Abnormal glucose	3	endocrine/metabolic	brown	8566	29511	4.53e-05	0.440416	0.229	0.652	TRUE	250.4	4.34346	SCC	NO	9
250.7	Diabetic retinopathy	3	endocrine/metabolic	brown	547	37194	0.000275	1.25714	0.58	1.934	TRUE	250.7	3.56099	SCC	NO	9
261.2	Vitamin B-complex deficiencies	3	endocrine/metabolic	brown	3083	30089	8.84e-22	1.45783	1.16	1.756	TRUE	261.2	21.0537	SCC	YES	9
272	Disorders of lipoid metabolism	3	endocrine/metabolic	brown	24133	19731	1.28e-06	0.436958	0.26	0.614	TRUE	272	5.89323	SCC	YES	9
272.1	Hyperlipidemia	3	endocrine/metabolic	brown	24048	19731	1.01e-06	0.441621	0.265	0.619	TRUE	272.1	5.99552	SCC	YES	9
275.3	Disorders of magnesium metabolism	3	endocrine/metabolic	brown	726	42593	0.0293896	0.654023	0.066	1.243	TRUE	275.3	1.53181	SCC	NO	9
411.4	Coronary atherosclerosis	8	circulatory system	red	5415	37728	1.15e-05	0.595004	0.329	0.861	TRUE	411.4	4.94102	SCC	NO	9
428.4	Heart failure with preserved EF [Diastolic heart failure]	8	circulatory system	red	973	39320	1.28e-09	1.64613	1.115	2.178	TRUE	428.4	8.89402	SCC	YES	9
433	Cerebrovascular disease	8	circulatory system	red	3396	41932	2.06e-11	1.00904	0.714	1.304	TRUE	433	10.6866	SCC	YES	9
443.9	Peripheral vascular disease, unspecified	8	circulatory system	red	1215	38510	6.53e-06	1.11933	0.633	1.606	TRUE	443.9	5.18525	SCC	YES	9
496.2	Chronic bronchitis	9	respiratory	coral4	893	32082	3.23e-31	3.13744	2.608	3.667	TRUE	496.2	30.4907	SCC	YES	9
585.33	Chronic Kidney Disease, Stage III	11	genitourinary	black	1633	36480	0.00160208	0.71258	0.27	1.155	TRUE	585.33	2.79532	SCC	NO	9
588	Disorders resulting from impaired renal function	11	genitourinary	black	484	36480	0.437685	-0.304611	-1.074	0.465	TRUE	588	0.358839	SCC	NO	9
588.2	Secondary hyperparathyroidism (of renal origin)	11	genitourinary	black	403	36480	0.596791	-0.225421	-1.061	0.61	TRUE	588.2	0.224177	SCC	NO	9
599	Other symptoms/disorders or the urinary system	11	genitourinary	black	12446	27827	2.59e-23	0.920221	0.739	1.102	TRUE	599	22.5865	SCC	YES	9
249	Secondary diabetes mellitus	3	endocrine/metabolic	brown	501	29511	6.13e-07	1.43816	0.873	2.003	TRUE	249	6.21251	NBD	YES	9
250.4	Abnormal glucose	3	endocrine/metabolic	brown	8566	29511	0.000253	0.317706	0.148	0.488	TRUE	250.4	3.59715	NBD	NO	9
250.7	Diabetic retinopathy	3	endocrine/metabolic	brown	547	37194	9.45e-13	1.84405	1.338	2.35	TRUE	250.7	12.0247	NBD	YES	9
261.2	Vitamin B-complex deficiencies	3	endocrine/metabolic	brown	3083	30089	3.34e-08	0.672332	0.434	0.911	TRUE	261.2	7.4769	NBD	YES	9
272	Disorders of lipoid metabolism	3	endocrine/metabolic	brown	24133	19731	3.08e-05	0.306466	0.162	0.451	TRUE	272	4.51082	NBD	NO	9
272.1	Hyperlipidemia	3	endocrine/metabolic	brown	24048	19731	2.98e-05	0.307372	0.163	0.452	TRUE	272.1	4.52569	NBD	NO	9
275.3	Disorders of magnesium metabolism	3	endocrine/metabolic	brown	726	42593	0.00183542	0.730533	0.271	1.19	TRUE	275.3	2.73626	NBD	NO	9
411.4	Coronary atherosclerosis	8	circulatory system	red	5415	37728	0.0361011	0.229476	0.015	0.444	TRUE	411.4	1.44248	NBD	NO	9
428.4	Heart failure with preserved EF [Diastolic heart failure]	8	circulatory system	red	973	39320	2.28e-08	1.18267	0.768	1.597	TRUE	428.4	7.64225	NBD	YES	9
433	Cerebrovascular disease	8	circulatory system	red	3396	41932	3.54e-06	0.559339	0.323	0.796	TRUE	433	5.45126	NBD	YES	9
443.9	Peripheral vascular disease, unspecified	8	circulatory system	red	1215	38510	2.23e-11	1.2679	0.896	1.639	TRUE	443.9	10.6517	NBD	YES	9
496.2	Chronic bronchitis	9	respiratory	coral4	893	32082	6.45e-21	1.94167	1.536	2.347	TRUE	496.2	20.1902	NBD	YES	9
585.33	Chronic Kidney Disease, Stage III	11	genitourinary	black	1633	36480	9.97e-05	0.691451	0.343	1.04	TRUE	585.33	4.00144	NBD	NO	9
588	Disorders resulting from impaired renal function	11	genitourinary	black	484	36480	0.000461	1.01407	0.447	1.582	TRUE	588	3.33619	NBD	NO	9
588.2	Secondary hyperparathyroidism (of renal origin)	11	genitourinary	black	403	36480	0.000177	1.16741	0.557	1.778	TRUE	588.2	3.75108	NBD	NO	9
599	Other symptoms/disorders or the urinary system	11	genitourinary	black	12446	27827	1.17e-11	0.50466	0.359	0.65	TRUE	599	10.9304	NBD	YES	9
249	Secondary diabetes mellitus	3	endocrine/metabolic	brown	501	29511	2.53e-27	2.68493	2.199	3.171	TRUE	249	26.597	ES	YES	9
250.4	Abnormal glucose	3	endocrine/metabolic	brown	8566	29511	4.05e-12	0.575753	0.413	0.738	TRUE	250.4	11.3923	ES	YES	9
250.7	Diabetic retinopathy	3	endocrine/metabolic	brown	547	37194	5.02e-29	2.57898	2.127	3.031	TRUE	250.7	28.2994	ES	YES	9
261.2	Vitamin B-complex deficiencies	3	endocrine/metabolic	brown	3083	30089	1.46e-21	1.0534	0.837	1.27	TRUE	261.2	20.8349	ES	YES	9
272	Disorders of lipoid metabolism	3	endocrine/metabolic	brown	24133	19731	5.03e-23	0.674525	0.541	0.808	TRUE	272	22.2984	ES	YES	9
272.1	Hyperlipidemia	3	endocrine/metabolic	brown	24048	19731	2.82e-23	0.679277	0.545	0.813	TRUE	272.1	22.5496	ES	YES	9
275.3	Disorders of magnesium metabolism	3	endocrine/metabolic	brown	726	42593	1.49e-18	1.74104	1.353	2.129	TRUE	275.3	17.8255	ES	YES	9
411.4	Coronary atherosclerosis	8	circulatory system	red	5415	37728	1.73e-22	1.03207	0.825	1.239	TRUE	411.4	21.7617	ES	YES	9
428.4	Heart failure with preserved EF [Diastolic heart failure]	8	circulatory system	red	973	39320	5.02e-47	2.67069	2.307	3.034	TRUE	428.4	46.2993	ES	YES	9
433	Cerebrovascular disease	8	circulatory system	red	3396	41932	1.05e-28	1.2396	1.021	1.458	TRUE	433	27.9794	ES	YES	9
443.9	Peripheral vascular disease, unspecified	8	circulatory system	red	1215	38510	7.72e-31	2.05983	1.71	2.409	TRUE	443.9	30.1126	ES	YES	9
496.2	Chronic bronchitis	9	respiratory	coral4	893	32082	4.55e-80	3.46052	3.103	3.818	TRUE	496.2	79.342	ES	YES	9
585.33	Chronic Kidney Disease, Stage III	11	genitourinary	black	1633	36480	9.26e-22	1.61659	1.286	1.947	TRUE	585.33	21.0336	ES	YES	9
588	Disorders resulting from impaired renal function	11	genitourinary	black	484	36480	1.86e-08	1.51518	0.987	2.043	TRUE	588	7.73139	ES	YES	9
588.2	Secondary hyperparathyroidism (of renal origin)	11	genitourinary	black	403	36480	9.5e-08	1.54992	0.981	2.119	TRUE	588.2	7.02239	ES	YES	9
599	Other symptoms/disorders or the urinary system	11	genitourinary	black	12446	27827	1.41e-48	1.01138	0.876	1.147	TRUE	599	47.8521	ES	YES	9
249	Secondary diabetes mellitus	3	endocrine/metabolic	brown	501	29511	2.63e-12	2.45833	1.77	3.147	TRUE	249	11.5807	HCAU	YES	9
250.4	Abnormal glucose	3	endocrine/metabolic	brown	8566	29511	7.78e-08	0.55216	0.351	0.754	TRUE	250.4	7.10886	HCAU	YES	9
250.7	Diabetic retinopathy	3	endocrine/metabolic	brown	547	37194	1.1e-06	1.61989	0.968	2.271	TRUE	250.7	5.95882	HCAU	YES	9
261.2	Vitamin B-complex deficiencies	3	endocrine/metabolic	brown	3083	30089	2.45e-29	1.59395	1.316	1.872	TRUE	261.2	28.6104	HCAU	YES	9
272	Disorders of lipoid metabolism	3	endocrine/metabolic	brown	24133	19731	4.57e-05	0.346368	0.18	0.513	TRUE	272	4.34008	HCAU	NO	9
272.1	Hyperlipidemia	3	endocrine/metabolic	brown	24048	19731	3.85e-05	0.350113	0.183	0.517	TRUE	272.1	4.41456	HCAU	NO	9
275.3	Disorders of magnesium metabolism	3	endocrine/metabolic	brown	726	42593	2.22e-05	1.19182	0.641	1.743	TRUE	275.3	4.65413	HCAU	NO	9
411.4	Coronary atherosclerosis	8	circulatory system	red	5415	37728	1.3e-17	1.12987	0.871	1.389	TRUE	411.4	16.8855	HCAU	YES	9
428.4	Heart failure with preserved EF [Diastolic heart failure]	8	circulatory system	red	973	39320	2.49e-25	2.63359	2.137	3.13	TRUE	428.4	24.6032	HCAU	YES	9
433	Cerebrovascular disease	8	circulatory system	red	3396	41932	3.81e-17	1.2199	0.936	1.504	TRUE	433	16.4186	HCAU	YES	9
443.9	Peripheral vascular disease, unspecified	8	circulatory system	red	1215	38510	1.88e-15	1.89141	1.425	2.358	TRUE	443.9	14.7269	HCAU	YES	9
496.2	Chronic bronchitis	9	respiratory	coral4	893	32082	7.1e-33	3.06897	2.565	3.573	TRUE	496.2	32.1487	HCAU	YES	9
585.33	Chronic Kidney Disease, Stage III	11	genitourinary	black	1633	36480	4.8e-07	1.11241	0.679	1.545	TRUE	585.33	6.31921	HCAU	YES	9
588	Disorders resulting from impaired renal function	11	genitourinary	black	484	36480	0.0480707	0.731973	0.006	1.458	TRUE	588	1.31812	HCAU	NO	9
588.2	Secondary hyperparathyroidism (of renal origin)	11	genitourinary	black	403	36480	0.0313014	0.86038	0.077	1.644	TRUE	588.2	1.50444	HCAU	NO	9
599	Other symptoms/disorders or the urinary system	11	genitourinary	black	12446	27827	1.65e-40	1.16164	0.991	1.332	TRUE	599	39.7831	HCAU	YES	9
249	Secondary diabetes mellitus	3	endocrine/metabolic	brown	501	28783	4.72e-22	1.70855	1.362	2.055	TRUE	249	21.3258	education	YES	9
250.4	Abnormal glucose	3	endocrine/metabolic	brown	8566	28783	4.54e-21	0.487583	0.386	0.589	TRUE	250.4	20.3428	education	YES	9
250.7	Diabetic retinopathy	3	endocrine/metabolic	brown	547	45893	3.14e-19	1.43477	1.121	1.748	TRUE	250.7	18.5031	education	YES	9
261.2	Vitamin B-complex deficiencies	3	endocrine/metabolic	brown	3083	29361	0.000585	0.257901	0.111	0.405	TRUE	261.2	3.233	education	NO	9
272	Disorders of lipoid metabolism	3	endocrine/metabolic	brown	24133	19003	6.22e-51	0.675043	0.587	0.763	TRUE	272	50.2059	education	YES	9
272.1	Hyperlipidemia	3	endocrine/metabolic	brown	24048	19003	8.7e-51	0.674836	0.587	0.763	TRUE	272.1	50.0603	education	YES	9
275.3	Disorders of magnesium metabolism	3	endocrine/metabolic	brown	726	41865	5.5e-27	1.48635	1.216	1.757	TRUE	275.3	26.2593	education	YES	9
411.4	Coronary atherosclerosis	8	circulatory system	red	5415	37000	3.75e-29	0.699153	0.577	0.821	TRUE	411.4	28.426	education	YES	9
428.4	Heart failure with preserved EF [Diastolic heart failure]	8	circulatory system	red	973	38592	5.06e-22	1.21104	0.965	1.457	TRUE	428.4	21.296	education	YES	9
433	Cerebrovascular disease	8	circulatory system	red	3396	41204	6.72e-14	0.529969	0.391	0.669	TRUE	433	13.1727	education	YES	9
443.9	Peripheral vascular disease, unspecified	8	circulatory system	red	1215	37782	4.71e-38	1.45373	1.233	1.675	TRUE	443.9	37.3274	education	YES	9
496.2	Chronic bronchitis	9	respiratory	coral4	893	31354	6.15e-76	2.36242	2.111	2.614	TRUE	496.2	75.2113	education	YES	9
585.33	Chronic Kidney Disease, Stage III	11	genitourinary	black	1633	35752	4.54e-15	0.809009	0.607	1.011	TRUE	585.33	14.3432	education	YES	9
588	Disorders resulting from impaired renal function	11	genitourinary	black	484	35752	6.91e-15	1.36385	1.021	1.707	TRUE	588	14.1608	education	YES	9
588.2	Secondary hyperparathyroidism (of renal origin)	11	genitourinary	black	403	35752	7.59e-14	1.42819	1.054	1.803	TRUE	588.2	13.12	education	YES	9
599	Other symptoms/disorders or the urinary system	11	genitourinary	black	12446	27099	1.05e-19	0.406732	0.319	0.494	TRUE	599	18.9777	education	YES	9
249	Secondary diabetes mellitus	3	endocrine/metabolic	brown	501	29511	1.16e-05	1.49441	0.826	2.163	TRUE	249	4.93393	median_income_subset	NO	9
250.4	Abnormal glucose	3	endocrine/metabolic	brown	8566	29511	8.54e-28	1.01728	0.835	1.2	TRUE	250.4	27.0683	median_income_subset	YES	9
250.7	Diabetic retinopathy	3	endocrine/metabolic	brown	547	37194	0.000427	1.11433	0.494	1.734	TRUE	250.7	3.37001	median_income_subset	NO	9
261.2	Vitamin B-complex deficiencies	3	endocrine/metabolic	brown	3083	30089	2.89e-31	1.78448	1.484	2.085	TRUE	261.2	30.5397	median_income_subset	YES	9
272	Disorders of lipoid metabolism	3	endocrine/metabolic	brown	24133	19731	1.28e-54	1.27357	1.113	1.434	TRUE	272	53.8914	median_income_subset	YES	9
272.1	Hyperlipidemia	3	endocrine/metabolic	brown	24048	19731	4.32e-55	1.28112	1.121	1.442	TRUE	272.1	54.3648	median_income_subset	YES	9
275.3	Disorders of magnesium metabolism	3	endocrine/metabolic	brown	726	42593	8.39e-17	2.6131	1.998	3.228	TRUE	275.3	16.0764	median_income_subset	YES	9
411.4	Coronary atherosclerosis	8	circulatory system	red	5415	37728	2.06e-10	0.705958	0.488	0.924	TRUE	411.4	9.68559	median_income_subset	YES	9
428.4	Heart failure with preserved EF [Diastolic heart failure]	8	circulatory system	red	973	39320	5.76e-09	1.42004	0.942	1.898	TRUE	428.4	8.2398	median_income_subset	YES	9
433	Cerebrovascular disease	8	circulatory system	red	3396	41932	0.000219	0.468885	0.22	0.718	TRUE	433	3.6594	median_income_subset	NO	9
443.9	Peripheral vascular disease, unspecified	8	circulatory system	red	1215	38510	2.49e-10	1.39528	0.963	1.827	TRUE	443.9	9.6042	median_income_subset	YES	9
496.2	Chronic bronchitis	9	respiratory	coral4	893	32082	1.02e-20	2.66781	2.108	3.228	TRUE	496.2	19.9897	median_income_subset	YES	9
585.33	Chronic Kidney Disease, Stage III	11	genitourinary	black	1633	36480	6.31e-17	1.65896	1.27	2.048	TRUE	585.33	16.2002	median_income_subset	YES	9
588	Disorders resulting from impaired renal function	11	genitourinary	black	484	36480	5.67e-06	1.58609	0.901	2.271	TRUE	588	5.24624	median_income_subset	YES	9
588.2	Secondary hyperparathyroidism (of renal origin)	11	genitourinary	black	403	36480	3.66e-06	1.79727	1.036	2.558	TRUE	588.2	5.43655	median_income_subset	YES	9
599	Other symptoms/disorders or the urinary system	11	genitourinary	black	12446	27827	4.19e-40	1.1181	0.953	1.283	TRUE	599	39.3779	median_income_subset	YES	9
249	Secondary diabetes mellitus	3	endocrine/metabolic	brown	501	29511	4.7e-12	2.30204	1.649	2.955	TRUE	249	11.328	high_school_education_subset	YES	9
250.4	Abnormal glucose	3	endocrine/metabolic	brown	8566	29511	0.000739	0.354713	0.149	0.561	TRUE	250.4	3.13107	high_school_education_subset	NO	9
250.7	Diabetic retinopathy	3	endocrine/metabolic	brown	547	37194	2.64e-08	1.82904	1.185	2.473	TRUE	250.7	7.57805	high_school_education_subset	YES	9
261.2	Vitamin B-complex deficiencies	3	endocrine/metabolic	brown	3083	30089	0.337714	-0.152886	-0.465	0.16	TRUE	261.2	0.47145	high_school_education_subset	NO	9
272	Disorders of lipoid metabolism	3	endocrine/metabolic	brown	24133	19731	0.000327	0.333803	0.152	0.516	TRUE	272	3.48519	high_school_education_subset	NO	9
272.1	Hyperlipidemia	3	endocrine/metabolic	brown	24048	19731	0.000237	0.341923	0.16	0.524	TRUE	272.1	3.62535	high_school_education_subset	NO	9
275.3	Disorders of magnesium metabolism	3	endocrine/metabolic	brown	726	42593	0.00131172	0.917968	0.358	1.478	TRUE	275.3	2.88216	high_school_education_subset	NO	9
411.4	Coronary atherosclerosis	8	circulatory system	red	5415	37728	0.00773119	0.342505	0.09	0.595	TRUE	411.4	2.11175	high_school_education_subset	NO	9
428.4	Heart failure with preserved EF [Diastolic heart failure]	8	circulatory system	red	973	39320	9.94e-06	1.11102	0.618	1.604	TRUE	428.4	5.00261	high_school_education_subset	NO	9
433	Cerebrovascular disease	8	circulatory system	red	3396	41932	0.00296541	0.432252	0.147	0.717	TRUE	433	2.52792	high_school_education_subset	NO	9
443.9	Peripheral vascular disease, unspecified	8	circulatory system	red	1215	38510	0.0210091	0.544823	0.082	1.008	TRUE	443.9	1.67759	high_school_education_subset	NO	9
496.2	Chronic bronchitis	9	respiratory	coral4	893	32082	0.0627879	0.505081	-0.027	1.037	TRUE	496.2	1.20212	high_school_education_subset	NO	9
585.33	Chronic Kidney Disease, Stage III	11	genitourinary	black	1633	36480	0.00356302	0.61116	0.2	1.022	TRUE	585.33	2.44818	high_school_education_subset	NO	9
588	Disorders resulting from impaired renal function	11	genitourinary	black	484	36480	1.06e-07	1.78246	1.125	2.44	TRUE	588	6.97569	high_school_education_subset	YES	9
588.2	Secondary hyperparathyroidism (of renal origin)	11	genitourinary	black	403	36480	1.43e-08	2.03808	1.334	2.743	TRUE	588.2	7.84536	high_school_education_subset	YES	9
599	Other symptoms/disorders or the urinary system	11	genitourinary	black	12446	27827	0.0131752	-0.232436	-0.416	-0.049	TRUE	599	1.88024	high_school_education_subset	NO	9
249	Secondary diabetes mellitus	3	endocrine/metabolic	brown	501	29511	1.13e-18	2.6366	2.051	3.222	TRUE	249	17.9483	assited_income_subset	YES	9
250.4	Abnormal glucose	3	endocrine/metabolic	brown	8566	29511	1.46e-07	0.531375	0.333	0.729	TRUE	250.4	6.83579	assited_income_subset	YES	9
250.7	Diabetic retinopathy	3	endocrine/metabolic	brown	547	37194	1.29e-07	1.64946	1.037	2.262	TRUE	250.7	6.88942	assited_income_subset	YES	9
261.2	Vitamin B-complex deficiencies	3	endocrine/metabolic	brown	3083	30089	1.8e-08	0.798473	0.52	1.076	TRUE	261.2	7.74379	assited_income_subset	YES	9
272	Disorders of lipoid metabolism	3	endocrine/metabolic	brown	24133	19731	3.83e-05	0.36985	0.194	0.546	TRUE	272	4.41724	assited_income_subset	NO	9
272.1	Hyperlipidemia	3	endocrine/metabolic	brown	24048	19731	3.22e-05	0.373888	0.198	0.55	TRUE	272.1	4.49219	assited_income_subset	NO	9
275.3	Disorders of magnesium metabolism	3	endocrine/metabolic	brown	726	42593	1.5e-07	1.36365	0.855	1.873	TRUE	275.3	6.82266	assited_income_subset	YES	9
411.4	Coronary atherosclerosis	8	circulatory system	red	5415	37728	1.54e-06	0.596858	0.353	0.84	TRUE	411.4	5.81267	assited_income_subset	YES	9
428.4	Heart failure with preserved EF [Diastolic heart failure]	8	circulatory system	red	973	39320	8.88e-08	1.26374	0.801	1.727	TRUE	428.4	7.05181	assited_income_subset	YES	9
433	Cerebrovascular disease	8	circulatory system	red	3396	41932	4.87e-08	0.748093	0.479	1.017	TRUE	433	7.31238	assited_income_subset	YES	9
443.9	Peripheral vascular disease, unspecified	8	circulatory system	red	1215	38510	1.07e-06	1.05958	0.634	1.485	TRUE	443.9	5.97258	assited_income_subset	YES	9
496.2	Chronic bronchitis	9	respiratory	coral4	893	32082	2.47e-05	1.04389	0.559	1.529	TRUE	496.2	4.60694	assited_income_subset	NO	9
585.33	Chronic Kidney Disease, Stage III	11	genitourinary	black	1633	36480	2.55e-09	1.17258	0.787	1.558	TRUE	585.33	8.59282	assited_income_subset	YES	9
588	Disorders resulting from impaired renal function	11	genitourinary	black	484	36480	7.75e-11	1.98353	1.386	2.581	TRUE	588	10.1105	assited_income_subset	YES	9
588.2	Secondary hyperparathyroidism (of renal origin)	11	genitourinary	black	403	36480	3.71e-13	2.32608	1.699	2.954	TRUE	588.2	12.4309	assited_income_subset	YES	9
599	Other symptoms/disorders or the urinary system	11	genitourinary	black	12446	27827	7.94e-05	0.353219	0.178	0.529	TRUE	599	4.10002	assited_income_subset	NO	9
249	Secondary diabetes mellitus	3	endocrine/metabolic	brown	501	29511	6.43e-05	1.37052	0.698	2.043	TRUE	249	4.19159	no_health_insurance_subset	NO	9
250.4	Abnormal glucose	3	endocrine/metabolic	brown	8566	29511	1.33e-07	0.52858	0.332	0.725	TRUE	250.4	6.87582	no_health_insurance_subset	YES	9
250.7	Diabetic retinopathy	3	endocrine/metabolic	brown	547	37194	1.23e-07	1.69316	1.066	2.321	TRUE	250.7	6.90984	no_health_insurance_subset	YES	9
261.2	Vitamin B-complex deficiencies	3	endocrine/metabolic	brown	3083	30089	0.0156375	0.361268	0.068	0.654	TRUE	261.2	1.80583	no_health_insurance_subset	NO	9
272	Disorders of lipoid metabolism	3	endocrine/metabolic	brown	24133	19731	2.39e-18	0.763131	0.592	0.934	TRUE	272	17.622	no_health_insurance_subset	YES	9
272.1	Hyperlipidemia	3	endocrine/metabolic	brown	24048	19731	1.32e-18	0.769834	0.598	0.941	TRUE	272.1	17.8792	no_health_insurance_subset	YES	9
275.3	Disorders of magnesium metabolism	3	endocrine/metabolic	brown	726	42593	3.94e-11	1.75011	1.231	2.269	TRUE	275.3	10.4045	no_health_insurance_subset	YES	9
411.4	Coronary atherosclerosis	8	circulatory system	red	5415	37728	5.62e-07	0.611548	0.372	0.851	TRUE	411.4	6.25004	no_health_insurance_subset	YES	9
428.4	Heart failure with preserved EF [Diastolic heart failure]	8	circulatory system	red	973	39320	2.95e-05	1.02358	0.543	1.504	TRUE	428.4	4.53028	no_health_insurance_subset	NO	9
433	Cerebrovascular disease	8	circulatory system	red	3396	41932	0.00021	0.51821	0.244	0.792	TRUE	433	3.67793	no_health_insurance_subset	NO	9
443.9	Peripheral vascular disease, unspecified	8	circulatory system	red	1215	38510	0.230031	0.2782	-0.176	0.732	TRUE	443.9	0.638214	no_health_insurance_subset	NO	9
496.2	Chronic bronchitis	9	respiratory	coral4	893	32082	0.0174907	0.625873	0.11	1.142	TRUE	496.2	1.75719	no_health_insurance_subset	NO	9
585.33	Chronic Kidney Disease, Stage III	11	genitourinary	black	1633	36480	1.5e-08	1.13192	0.74	1.524	TRUE	585.33	7.82357	no_health_insurance_subset	YES	9
588	Disorders resulting from impaired renal function	11	genitourinary	black	484	36480	7.74e-10	2.00967	1.369	2.65	TRUE	588	9.11102	no_health_insurance_subset	YES	9
588.2	Secondary hyperparathyroidism (of renal origin)	11	genitourinary	black	403	36480	8.62e-07	1.76995	1.065	2.475	TRUE	588.2	6.06426	no_health_insurance_subset	YES	9
599	Other symptoms/disorders or the urinary system	11	genitourinary	black	12446	27827	0.00189653	-0.278517	-0.454	-0.103	TRUE	599	2.72204	no_health_insurance_subset	NO	9
249	Secondary diabetes mellitus	3	endocrine/metabolic	brown	501	29511	9.11e-09	2.29452	1.512	3.077	TRUE	249	8.04047	area_poverty_subset	YES	9
250.4	Abnormal glucose	3	endocrine/metabolic	brown	8566	29511	3.36e-08	0.650369	0.42	0.881	TRUE	250.4	7.47344	area_poverty_subset	YES	9
250.7	Diabetic retinopathy	3	endocrine/metabolic	brown	547	37194	7.87e-06	1.71373	0.962	2.465	TRUE	250.7	5.10418	area_poverty_subset	NO	9
261.2	Vitamin B-complex deficiencies	3	endocrine/metabolic	brown	3083	30089	1.8e-05	0.733953	0.399	1.069	TRUE	261.2	4.74473	area_poverty_subset	NO	9
272	Disorders of lipoid metabolism	3	endocrine/metabolic	brown	24133	19731	3.34e-06	0.489409	0.283	0.696	TRUE	272	5.47586	area_poverty_subset	YES	9
272.1	Hyperlipidemia	3	endocrine/metabolic	brown	24048	19731	2.68e-06	0.494854	0.288	0.701	TRUE	272.1	5.57164	area_poverty_subset	YES	9
275.3	Disorders of magnesium metabolism	3	endocrine/metabolic	brown	726	42593	5.82e-07	1.59952	0.972	2.227	TRUE	275.3	6.23496	area_poverty_subset	YES	9
411.4	Coronary atherosclerosis	8	circulatory system	red	5415	37728	0.00500677	0.409278	0.123	0.695	TRUE	411.4	2.30044	area_poverty_subset	NO	9
428.4	Heart failure with preserved EF [Diastolic heart failure]	8	circulatory system	red	973	39320	1.6e-05	1.24571	0.68	1.812	TRUE	428.4	4.79719	area_poverty_subset	NO	9
433	Cerebrovascular disease	8	circulatory system	red	3396	41932	0.00208816	0.505882	0.184	0.828	TRUE	433	2.68024	area_poverty_subset	NO	9
443.9	Peripheral vascular disease, unspecified	8	circulatory system	red	1215	38510	0.000494	0.920008	0.402	1.438	TRUE	443.9	3.30584	area_poverty_subset	NO	9
496.2	Chronic bronchitis	9	respiratory	coral4	893	32082	9.58e-05	1.16749	0.581	1.754	TRUE	496.2	4.01863	area_poverty_subset	NO	9
585.33	Chronic Kidney Disease, Stage III	11	genitourinary	black	1633	36480	5.23e-11	1.52749	1.071	1.984	TRUE	585.33	10.2817	area_poverty_subset	YES	9
588	Disorders resulting from impaired renal function	11	genitourinary	black	484	36480	3.53e-08	2.118	1.365	2.871	TRUE	588	7.45179	area_poverty_subset	YES	9
588.2	Secondary hyperparathyroidism (of renal origin)	11	genitourinary	black	403	36480	4.12e-07	2.11895	1.299	2.939	TRUE	588.2	6.38531	area_poverty_subset	YES	9
599	Other symptoms/disorders or the urinary system	11	genitourinary	black	12446	27827	4.57e-08	0.573803	0.368	0.78	TRUE	599	7.33976	area_poverty_subset	YES	9
249	Secondary diabetes mellitus	3	endocrine/metabolic	brown	501	29511	0.00118002	1.24836	0.494	2.003	TRUE	249	2.92811	vacant_housing_subset	NO	9
250.4	Abnormal glucose	3	endocrine/metabolic	brown	8566	29511	0.0152881	0.31158	0.06	0.563	TRUE	250.4	1.81565	vacant_housing_subset	NO	9
250.7	Diabetic retinopathy	3	endocrine/metabolic	brown	547	37194	0.328423	0.398671	-0.401	1.198	TRUE	250.7	0.483567	vacant_housing_subset	NO	9
261.2	Vitamin B-complex deficiencies	3	endocrine/metabolic	brown	3083	30089	7.61e-20	1.52666	1.199	1.855	TRUE	261.2	19.1188	vacant_housing_subset	YES	9
272	Disorders of lipoid metabolism	3	endocrine/metabolic	brown	24133	19731	1.6e-10	0.762776	0.529	0.997	TRUE	272	9.79534	vacant_housing_subset	YES	9
272.1	Hyperlipidemia	3	endocrine/metabolic	brown	24048	19731	1.65e-10	0.763454	0.529	0.998	TRUE	272.1	9.78368	vacant_housing_subset	YES	9
275.3	Disorders of magnesium metabolism	3	endocrine/metabolic	brown	726	42593	5.81e-10	1.84362	1.26	2.427	TRUE	275.3	9.23564	vacant_housing_subset	YES	9
411.4	Coronary atherosclerosis	8	circulatory system	red	5415	37728	1.77e-15	1.18321	0.892	1.475	TRUE	411.4	14.7532	vacant_housing_subset	YES	9
428.4	Heart failure with preserved EF [Diastolic heart failure]	8	circulatory system	red	973	39320	5.79e-05	1.14615	0.588	1.705	TRUE	428.4	4.23764	vacant_housing_subset	NO	9
433	Cerebrovascular disease	8	circulatory system	red	3396	41932	8.01e-09	0.961243	0.635	1.288	TRUE	433	8.09623	vacant_housing_subset	YES	9
443.9	Peripheral vascular disease, unspecified	8	circulatory system	red	1215	38510	0.000151	1.00626	0.486	1.527	TRUE	443.9	3.82221	vacant_housing_subset	NO	9
496.2	Chronic bronchitis	9	respiratory	coral4	893	32082	2.11e-07	1.52301	0.948	2.098	TRUE	496.2	6.67488	vacant_housing_subset	YES	9
585.33	Chronic Kidney Disease, Stage III	11	genitourinary	black	1633	36480	0.00254295	0.722163	0.253	1.191	TRUE	585.33	2.59466	vacant_housing_subset	NO	9
588	Disorders resulting from impaired renal function	11	genitourinary	black	484	36480	0.00564849	1.10001	0.321	1.879	TRUE	588	2.24807	vacant_housing_subset	NO	9
588.2	Secondary hyperparathyroidism (of renal origin)	11	genitourinary	black	403	36480	0.00206008	1.29945	0.473	2.126	TRUE	588.2	2.68612	vacant_housing_subset	NO	9
599	Other symptoms/disorders or the urinary system	11	genitourinary	black	12446	27827	0.00724288	0.311054	0.084	0.538	TRUE	599	2.14009	vacant_housing_subset	NO	9
249	Secondary diabetes mellitus	3	endocrine/metabolic	brown	501	29511	3.74e-12	2.49876	1.794	3.204	TRUE	249	11.4268	deprivation_index_subset	YES	9
250.4	Abnormal glucose	3	endocrine/metabolic	brown	8566	29511	4.71e-14	0.789452	0.584	0.995	TRUE	250.4	13.3268	deprivation_index_subset	YES	9
250.7	Diabetic retinopathy	3	endocrine/metabolic	brown	547	37194	5.46e-08	1.87396	1.198	2.55	TRUE	250.7	7.26247	deprivation_index_subset	YES	9
261.2	Vitamin B-complex deficiencies	3	endocrine/metabolic	brown	3083	30089	2.44e-11	1.02406	0.723	1.325	TRUE	261.2	10.6128	deprivation_index_subset	YES	9
272	Disorders of lipoid metabolism	3	endocrine/metabolic	brown	24133	19731	2.3e-21	0.888346	0.705	1.072	TRUE	272	20.6389	deprivation_index_subset	YES	9
272.1	Hyperlipidemia	3	endocrine/metabolic	brown	24048	19731	1.17e-21	0.896135	0.712	1.08	TRUE	272.1	20.9314	deprivation_index_subset	YES	9
275.3	Disorders of magnesium metabolism	3	endocrine/metabolic	brown	726	42593	4.21e-13	2.06591	1.507	2.625	TRUE	275.3	12.3755	deprivation_index_subset	YES	9
411.4	Coronary atherosclerosis	8	circulatory system	red	5415	37728	5.37e-09	0.747112	0.496	0.998	TRUE	411.4	8.26964	deprivation_index_subset	YES	9
428.4	Heart failure with preserved EF [Diastolic heart failure]	8	circulatory system	red	973	39320	3.82e-09	1.50607	1.005	2.007	TRUE	428.4	8.41821	deprivation_index_subset	YES	9
433	Cerebrovascular disease	8	circulatory system	red	3396	41932	1.43e-06	0.700112	0.415	0.985	TRUE	433	5.84521	deprivation_index_subset	YES	9
443.9	Peripheral vascular disease, unspecified	8	circulatory system	red	1215	38510	2.36e-06	1.10565	0.647	1.565	TRUE	443.9	5.62676	deprivation_index_subset	YES	9
496.2	Chronic bronchitis	9	respiratory	coral4	893	32082	5.76e-09	1.55113	1.029	2.073	TRUE	496.2	8.23972	deprivation_index_subset	YES	9
585.33	Chronic Kidney Disease, Stage III	11	genitourinary	black	1633	36480	4.55e-13	1.51478	1.105	1.925	TRUE	585.33	12.3417	deprivation_index_subset	YES	9
588	Disorders resulting from impaired renal function	11	genitourinary	black	484	36480	6.38e-11	2.28975	1.603	2.977	TRUE	588	10.195	deprivation_index_subset	YES	9
588.2	Secondary hyperparathyroidism (of renal origin)	11	genitourinary	black	403	36480	1.05e-10	2.45248	1.708	3.197	TRUE	588.2	9.97999	deprivation_index_subset	YES	9
599	Other symptoms/disorders or the urinary system	11	genitourinary	black	12446	27827	1.15e-06	0.452814	0.27	0.635	TRUE	599	5.93955	deprivation_index_subset	YES	9
173	Neoplasm of uncertain behavior of skin	2	neoplasms	darkcyan	3837	37468	3.74e-23	-1.1871	-1.422	-0.952	TRUE	173	22.4266	SDOH	YES	8
217.1	Nevus, non-neoplastic	2	neoplasms	darkcyan	1948	32127	2.23e-31	-1.99905	-2.335	-1.663	TRUE	217.1	30.6511	SDOH	YES	8
228.1	Hemangioma of skin and subcutaneous tissue	2	neoplasms	darkcyan	2901	40746	4.22e-40	-1.90942	-2.192	-1.627	TRUE	228.1	39.3752	SDOH	YES	8
272.11	Hypercholesterolemia	3	endocrine/metabolic	brown	8107	19731	2.99e-08	0.545936	0.353	0.739	TRUE	272.11	7.52374	SDOH	YES	8
415	Pulmonary heart disease	8	circulatory system	red	1453	42885	4.32e-08	0.859394	0.552	1.167	TRUE	415	7.36436	SDOH	YES	8
496.21	Obstructive chronic bronchitis	9	respiratory	coral4	541	32082	6.15e-50	3.31034	2.874	3.747	TRUE	496.21	49.2114	SDOH	YES	8
509.8	Dependence on respirator [Ventilator] or supplemental oxygen	9	respiratory	coral4	320	40896	1.44e-21	2.70825	2.152	3.265	TRUE	509.8	20.8404	SDOH	YES	8
586.2	Cyst of kidney, acquired	11	genitourinary	black	1274	36480	8.23e-07	0.864822	0.521	1.209	TRUE	586.2	6.08465	SDOH	YES	8
599.8	Other symptoms involving urinary system	11	genitourinary	black	1616	27827	0.0479891	0.323717	0.003	0.645	TRUE	599.8	1.31886	SDOH	NO	8
610	Benign mammary dysplasias	11	genitourinary	black	2327	15553	0.000322	-0.533749	-0.825	-0.243	TRUE	610	3.49268	SDOH	NO	8
614	Inflammatory diseases of female pelvic organs	11	genitourinary	black	2978	22213	7.85e-15	0.920982	0.689	1.153	TRUE	614	14.1052	SDOH	YES	8
614.5	Inflammatory disease of cervix, vagina, and vulva	11	genitourinary	black	2693	22213	5.14e-14	0.932334	0.69	1.175	TRUE	614.5	13.2892	SDOH	YES	8
614.52	Vaginitis and vulvovaginitis	11	genitourinary	black	2179	22213	2.52e-14	1.02179	0.759	1.285	TRUE	614.52	13.5991	SDOH	YES	8
173	Neoplasm of uncertain behavior of skin	2	neoplasms	darkcyan	3837	37468	4.22e-21	-1.43731	-1.736	-1.138	TRUE	173	20.3749	SCC	YES	8
217.1	Nevus, non-neoplastic	2	neoplasms	darkcyan	1948	32127	2.41e-21	-1.9889	-2.4	-1.578	TRUE	217.1	20.618	SCC	YES	8
228.1	Hemangioma of skin and subcutaneous tissue	2	neoplasms	darkcyan	2901	40746	1.78e-27	-1.89268	-2.234	-1.551	TRUE	228.1	26.7494	SCC	YES	8
272.11	Hypercholesterolemia	3	endocrine/metabolic	brown	8107	19731	0.0487399	0.253843	0.001	0.506	TRUE	272.11	1.31212	SCC	NO	8
415	Pulmonary heart disease	8	circulatory system	red	1453	42885	0.00206134	0.668962	0.243	1.094	TRUE	415	2.68585	SCC	NO	8
496.21	Obstructive chronic bronchitis	9	respiratory	coral4	541	32082	1.21e-24	3.51203	2.84	4.184	TRUE	496.21	23.9165	SCC	YES	8
509.8	Dependence on respirator [Ventilator] or supplemental oxygen	9	respiratory	coral4	320	40896	0.000351	1.58658	0.717	2.457	TRUE	509.8	3.4544	SCC	NO	8
586.2	Cyst of kidney, acquired	11	genitourinary	black	1274	36480	1.12e-05	1.04633	0.58	1.513	TRUE	586.2	4.95236	SCC	NO	8
599.8	Other symptoms involving urinary system	11	genitourinary	black	1616	27827	0.00015	0.805715	0.389	1.222	TRUE	599.8	3.82473	SCC	NO	8
610	Benign mammary dysplasias	11	genitourinary	black	2327	15553	1.98e-05	-0.830783	-1.212	-0.449	TRUE	610	4.70276	SCC	NO	8
614	Inflammatory diseases of female pelvic organs	11	genitourinary	black	2978	22213	4.28e-05	0.66231	0.345	0.98	TRUE	614	4.36811	SCC	NO	8
614.5	Inflammatory disease of cervix, vagina, and vulva	11	genitourinary	black	2693	22213	9.93e-05	0.658918	0.327	0.991	TRUE	614.5	4.00305	SCC	NO	8
614.52	Vaginitis and vulvovaginitis	11	genitourinary	black	2179	22213	0.000825	0.622026	0.257	0.987	TRUE	614.52	3.08366	SCC	NO	8
173	Neoplasm of uncertain behavior of skin	2	neoplasms	darkcyan	3837	37468	0.0793916	-0.210003	-0.445	0.025	TRUE	173	1.10023	NBD	NO	8
217.1	Nevus, non-neoplastic	2	neoplasms	darkcyan	1948	32127	0.0539907	-0.311464	-0.628	0.005	TRUE	217.1	1.26768	NBD	NO	8
228.1	Hemangioma of skin and subcutaneous tissue	2	neoplasms	darkcyan	2901	40746	4.58e-05	-0.55865	-0.827	-0.29	TRUE	228.1	4.3392	NBD	NO	8
272.11	Hypercholesterolemia	3	endocrine/metabolic	brown	8107	19731	1.73e-05	0.446783	0.243	0.651	TRUE	272.11	4.76116	NBD	NO	8
415	Pulmonary heart disease	8	circulatory system	red	1453	42885	0.00543958	0.48142	0.142	0.821	TRUE	415	2.26443	NBD	NO	8
496.21	Obstructive chronic bronchitis	9	respiratory	coral4	541	32082	1.88e-18	2.26242	1.756	2.768	TRUE	496.21	17.7257	NBD	YES	8
509.8	Dependence on respirator [Ventilator] or supplemental oxygen	9	respiratory	coral4	320	40896	0.000171	1.28472	0.615	1.955	TRUE	509.8	3.76735	NBD	NO	8
586.2	Cyst of kidney, acquired	11	genitourinary	black	1274	36480	2.01e-05	0.79819	0.431	1.165	TRUE	586.2	4.69671	NBD	NO	8
599.8	Other symptoms involving urinary system	11	genitourinary	black	1616	27827	0.000578	0.587016	0.253	0.921	TRUE	599.8	3.23781	NBD	NO	8
610	Benign mammary dysplasias	11	genitourinary	black	2327	15553	0.121304	0.234569	-0.062	0.531	TRUE	610	0.916125	NBD	NO	8
614	Inflammatory diseases of female pelvic organs	11	genitourinary	black	2978	22213	3.61e-25	1.26897	1.029	1.509	TRUE	614	24.4427	NBD	YES	8
614.5	Inflammatory disease of cervix, vagina, and vulva	11	genitourinary	black	2693	22213	2.36e-25	1.32708	1.077	1.577	TRUE	614.5	24.6273	NBD	YES	8
614.52	Vaginitis and vulvovaginitis	11	genitourinary	black	2179	22213	3.14e-23	1.37705	1.105	1.649	TRUE	614.52	22.5024	NBD	YES	8
173	Neoplasm of uncertain behavior of skin	2	neoplasms	darkcyan	3837	37468	3.36e-46	-1.92795	-2.193	-1.663	TRUE	173	45.4743	ES	YES	8
217.1	Nevus, non-neoplastic	2	neoplasms	darkcyan	1948	32127	5.03e-63	-3.50121	-3.911	-3.092	TRUE	217.1	62.2983	ES	YES	8
228.1	Hemangioma of skin and subcutaneous tissue	2	neoplasms	darkcyan	2901	40746	1.57e-81	-3.3329	-3.674	-2.991	TRUE	228.1	80.804	ES	YES	8
272.11	Hypercholesterolemia	3	endocrine/metabolic	brown	8107	19731	0.00614408	0.273807	0.078	0.47	TRUE	272.11	2.21154	ES	NO	8
415	Pulmonary heart disease	8	circulatory system	red	1453	42885	3.09e-16	1.2514	0.951	1.552	TRUE	415	15.5097	ES	YES	8
496.21	Obstructive chronic bronchitis	9	respiratory	coral4	541	32082	3.55e-71	4.04731	3.603	4.492	TRUE	496.21	70.4502	ES	YES	8
509.8	Dependence on respirator [Ventilator] or supplemental oxygen	9	respiratory	coral4	320	40896	4.05e-21	2.72332	2.157	3.289	TRUE	509.8	20.3922	ES	YES	8
586.2	Cyst of kidney, acquired	11	genitourinary	black	1274	36480	2.41e-09	1.07777	0.724	1.432	TRUE	586.2	8.61771	ES	YES	8
599.8	Other symptoms involving urinary system	11	genitourinary	black	1616	27827	2.08e-09	0.947121	0.637	1.257	TRUE	599.8	8.68226	ES	YES	8
610	Benign mammary dysplasias	11	genitourinary	black	2327	15553	6.55e-14	-1.14925	-1.45	-0.849	TRUE	610	13.1835	ES	YES	8
614	Inflammatory diseases of female pelvic organs	11	genitourinary	black	2978	22213	3.19e-19	0.991597	0.775	1.208	TRUE	614	18.4957	ES	YES	8
614.5	Inflammatory disease of cervix, vagina, and vulva	11	genitourinary	black	2693	22213	4.05e-18	1.00443	0.778	1.231	TRUE	614.5	17.3924	ES	YES	8
614.52	Vaginitis and vulvovaginitis	11	genitourinary	black	2179	22213	1.69e-17	1.06876	0.823	1.315	TRUE	614.52	16.7724	ES	YES	8
173	Neoplasm of uncertain behavior of skin	2	neoplasms	darkcyan	3837	37468	2.5e-25	-1.58505	-1.884	-1.286	TRUE	173	24.6019	HCAU	YES	8
217.1	Nevus, non-neoplastic	2	neoplasms	darkcyan	1948	32127	8.34e-24	-2.12252	-2.536	-1.709	TRUE	217.1	23.079	HCAU	YES	8
228.1	Hemangioma of skin and subcutaneous tissue	2	neoplasms	darkcyan	2901	40746	8.1e-33	-2.08906	-2.432	-1.746	TRUE	228.1	32.0913	HCAU	YES	8
272.11	Hypercholesterolemia	3	endocrine/metabolic	brown	8107	19731	0.387068	0.105714	-0.134	0.345	TRUE	272.11	0.412213	HCAU	NO	8
415	Pulmonary heart disease	8	circulatory system	red	1453	42885	2.6e-08	1.14567	0.742	1.549	TRUE	415	7.585	HCAU	YES	8
496.21	Obstructive chronic bronchitis	9	respiratory	coral4	541	32082	2.86e-24	3.32475	2.684	3.966	TRUE	496.21	23.544	HCAU	YES	8
509.8	Dependence on respirator [Ventilator] or supplemental oxygen	9	respiratory	coral4	320	40896	2.12e-08	2.32387	1.511	3.137	TRUE	509.8	7.67425	HCAU	YES	8
586.2	Cyst of kidney, acquired	11	genitourinary	black	1274	36480	0.000136	0.890047	0.433	1.347	TRUE	586.2	3.86644	HCAU	NO	8
599.8	Other symptoms involving urinary system	11	genitourinary	black	1616	27827	1.36e-17	1.68624	1.299	2.073	TRUE	599.8	16.8667	HCAU	YES	8
610	Benign mammary dysplasias	11	genitourinary	black	2327	15553	8.82e-08	-0.967822	-1.322	-0.613	TRUE	610	7.05463	HCAU	YES	8
614	Inflammatory diseases of female pelvic organs	11	genitourinary	black	2978	22213	0.0853332	0.255273	-0.036	0.546	TRUE	614	1.06888	HCAU	NO	8
614.5	Inflammatory disease of cervix, vagina, and vulva	11	genitourinary	black	2693	22213	0.167141	0.214586	-0.09	0.519	TRUE	614.5	0.776916	HCAU	NO	8
614.52	Vaginitis and vulvovaginitis	11	genitourinary	black	2179	22213	0.238473	0.200355	-0.133	0.533	TRUE	614.52	0.622561	HCAU	NO	8
173	Neoplasm of uncertain behavior of skin	2	neoplasms	darkcyan	3837	36740	9.6e-48	-1.07981	-1.226	-0.934	TRUE	173	47.0179	education	YES	8
217.1	Nevus, non-neoplastic	2	neoplasms	darkcyan	1948	31399	7.87e-71	-1.92911	-2.142	-1.717	TRUE	217.1	70.1038	education	YES	8
228.1	Hemangioma of skin and subcutaneous tissue	2	neoplasms	darkcyan	2901	40018	1.07e-85	-1.74291	-1.917	-1.569	TRUE	228.1	84.9719	education	YES	8
272.11	Hypercholesterolemia	3	endocrine/metabolic	brown	8107	19003	1.2e-08	0.35639	0.234	0.479	TRUE	272.11	7.92153	education	YES	8
415	Pulmonary heart disease	8	circulatory system	red	1453	42157	8.62e-10	0.632501	0.43	0.835	TRUE	415	9.06446	education	YES	8
496.21	Obstructive chronic bronchitis	9	respiratory	coral4	541	31354	7.3e-64	2.74793	2.429	3.067	TRUE	496.21	63.1369	education	YES	8
509.8	Dependence on respirator [Ventilator] or supplemental oxygen	9	respiratory	coral4	320	40168	1.51e-28	2.2927	1.887	2.698	TRUE	509.8	27.8219	education	YES	8
586.2	Cyst of kidney, acquired	11	genitourinary	black	1274	35752	7.63e-06	0.506233	0.285	0.728	TRUE	586.2	5.11758	education	NO	8
599.8	Other symptoms involving urinary system	11	genitourinary	black	1616	27099	0.1485	0.150695	-0.054	0.355	TRUE	599.8	0.828273	education	NO	8
610	Benign mammary dysplasias	11	genitourinary	black	2327	15179	5.07e-11	-0.62699	-0.814	-0.44	TRUE	610	10.2951	education	YES	8
614	Inflammatory diseases of female pelvic organs	11	genitourinary	black	2978	21839	4.21e-13	0.5816	0.424	0.739	TRUE	614	12.376	education	YES	8
614.5	Inflammatory disease of cervix, vagina, and vulva	11	genitourinary	black	2693	21839	7.39e-13	0.601555	0.437	0.766	TRUE	614.5	12.1316	education	YES	8
614.52	Vaginitis and vulvovaginitis	11	genitourinary	black	2179	21839	4.89e-14	0.689724	0.51	0.869	TRUE	614.52	13.3107	education	YES	8
173	Neoplasm of uncertain behavior of skin	2	neoplasms	darkcyan	3837	37468	0.211992	-0.147184	-0.378	0.084	TRUE	173	0.673681	median_income_subset	NO	8
217.1	Nevus, non-neoplastic	2	neoplasms	darkcyan	1948	32127	0.000294	-0.566469	-0.873	-0.26	TRUE	217.1	3.53159	median_income_subset	NO	8
228.1	Hemangioma of skin and subcutaneous tissue	2	neoplasms	darkcyan	2901	40746	1.41e-05	-0.544276	-0.79	-0.299	TRUE	228.1	4.8507	median_income_subset	NO	8
272.11	Hypercholesterolemia	3	endocrine/metabolic	brown	8107	19731	7.73e-45	1.64419	1.415	1.874	TRUE	272.11	44.1117	median_income_subset	YES	8
415	Pulmonary heart disease	8	circulatory system	red	1453	42885	3.84e-06	0.896071	0.516	1.276	TRUE	415	5.41594	median_income_subset	YES	8
496.21	Obstructive chronic bronchitis	9	respiratory	coral4	541	32082	3.14e-15	2.87692	2.162	3.592	TRUE	496.21	14.5032	median_income_subset	YES	8
509.8	Dependence on respirator [Ventilator] or supplemental oxygen	9	respiratory	coral4	320	40896	1.11e-10	3.14507	2.19	4.101	TRUE	509.8	9.95592	median_income_subset	YES	8
586.2	Cyst of kidney, acquired	11	genitourinary	black	1274	36480	3.16e-05	0.848791	0.449	1.249	TRUE	586.2	4.50053	median_income_subset	NO	8
599.8	Other symptoms involving urinary system	11	genitourinary	black	1616	27827	4.24e-12	1.3565	0.973	1.74	TRUE	599.8	11.3725	median_income_subset	YES	8
610	Benign mammary dysplasias	11	genitourinary	black	2327	15553	0.115792	0.269462	-0.066	0.605	TRUE	610	0.936321	median_income_subset	NO	8
614	Inflammatory diseases of female pelvic organs	11	genitourinary	black	2978	22213	0.562792	0.0861871	-0.206	0.378	TRUE	614	0.249652	median_income_subset	NO	8
614.5	Inflammatory disease of cervix, vagina, and vulva	11	genitourinary	black	2693	22213	0.567188	0.0891382	-0.216	0.394	TRUE	614.5	0.246273	median_income_subset	NO	8
614.52	Vaginitis and vulvovaginitis	11	genitourinary	black	2179	22213	0.884006	0.0247772	-0.308	0.358	TRUE	614.52	0.0535447	median_income_subset	NO	8
173	Neoplasm of uncertain behavior of skin	2	neoplasms	darkcyan	3837	37468	3.54e-07	0.70547	0.434	0.977	TRUE	173	6.45105	high_school_education_subset	YES	8
217.1	Nevus, non-neoplastic	2	neoplasms	darkcyan	1948	32127	2.18e-07	0.973554	0.605	1.342	TRUE	217.1	6.6607	high_school_education_subset	YES	8
228.1	Hemangioma of skin and subcutaneous tissue	2	neoplasms	darkcyan	2901	40746	4.04e-06	-0.768856	-1.096	-0.442	TRUE	228.1	5.3937	high_school_education_subset	YES	8
272.11	Hypercholesterolemia	3	endocrine/metabolic	brown	8107	19731	0.000542	0.437293	0.19	0.685	TRUE	272.11	3.26594	high_school_education_subset	NO	8
415	Pulmonary heart disease	8	circulatory system	red	1453	42885	0.000536	0.721101	0.313	1.129	TRUE	415	3.27079	high_school_education_subset	NO	8
496.21	Obstructive chronic bronchitis	9	respiratory	coral4	541	32082	0.00365959	0.97485	0.317	1.632	TRUE	496.21	2.43657	high_school_education_subset	NO	8
509.8	Dependence on respirator [Ventilator] or supplemental oxygen	9	respiratory	coral4	320	40896	0.0103209	1.08958	0.257	1.922	TRUE	509.8	1.98628	high_school_education_subset	NO	8
586.2	Cyst of kidney, acquired	11	genitourinary	black	1274	36480	3.8e-12	1.49613	1.074	1.918	TRUE	586.2	11.42	high_school_education_subset	YES	8
599.8	Other symptoms involving urinary system	11	genitourinary	black	1616	27827	0.000269	0.747548	0.345	1.15	TRUE	599.8	3.57069	high_school_education_subset	NO	8
610	Benign mammary dysplasias	11	genitourinary	black	2327	15553	1.44e-07	1.0079	0.632	1.383	TRUE	610	6.84167	high_school_education_subset	YES	8
614	Inflammatory diseases of female pelvic organs	11	genitourinary	black	2978	22213	1.11e-14	1.23419	0.921	1.547	TRUE	614	13.9565	high_school_education_subset	YES	8
614.5	Inflammatory disease of cervix, vagina, and vulva	11	genitourinary	black	2693	22213	2.32e-14	1.27262	0.946	1.599	TRUE	614.5	13.634	high_school_education_subset	YES	8
614.52	Vaginitis and vulvovaginitis	11	genitourinary	black	2179	22213	2.39e-15	1.43523	1.08	1.79	TRUE	614.52	14.6216	high_school_education_subset	YES	8
173	Neoplasm of uncertain behavior of skin	2	neoplasms	darkcyan	3837	37468	0.0139969	0.32966	0.067	0.593	TRUE	173	1.85397	assited_income_subset	NO	8
217.1	Nevus, non-neoplastic	2	neoplasms	darkcyan	1948	32127	6.54e-06	0.797705	0.451	1.145	TRUE	217.1	5.18439	assited_income_subset	YES	8
228.1	Hemangioma of skin and subcutaneous tissue	2	neoplasms	darkcyan	2901	40746	0.58782	-0.0830368	-0.383	0.217	TRUE	228.1	0.230755	assited_income_subset	NO	8
272.11	Hypercholesterolemia	3	endocrine/metabolic	brown	8107	19731	4.42e-15	0.948917	0.712	1.186	TRUE	272.11	14.3547	assited_income_subset	YES	8
415	Pulmonary heart disease	8	circulatory system	red	1453	42885	6.4e-06	0.883999	0.5	1.268	TRUE	415	5.19371	assited_income_subset	YES	8
496.21	Obstructive chronic bronchitis	9	respiratory	coral4	541	32082	0.000263	1.13834	0.527	1.75	TRUE	496.21	3.57977	assited_income_subset	NO	8
509.8	Dependence on respirator [Ventilator] or supplemental oxygen	9	respiratory	coral4	320	40896	0.131573	0.620486	-0.186	1.427	TRUE	509.8	0.880834	assited_income_subset	NO	8
586.2	Cyst of kidney, acquired	11	genitourinary	black	1274	36480	1.68e-15	1.6116	1.215	2.008	TRUE	586.2	14.7741	assited_income_subset	YES	8
599.8	Other symptoms involving urinary system	11	genitourinary	black	1616	27827	1.15e-08	1.07355	0.705	1.442	TRUE	599.8	7.94041	assited_income_subset	YES	8
610	Benign mammary dysplasias	11	genitourinary	black	2327	15553	2.74e-10	1.09371	0.754	1.433	TRUE	610	9.563	assited_income_subset	YES	8
614	Inflammatory diseases of female pelvic organs	11	genitourinary	black	2978	22213	1.78e-17	1.21635	0.936	1.497	TRUE	614	16.749	assited_income_subset	YES	8
614.5	Inflammatory disease of cervix, vagina, and vulva	11	genitourinary	black	2693	22213	5.57e-17	1.24429	0.953	1.536	TRUE	614.5	16.2545	assited_income_subset	YES	8
614.52	Vaginitis and vulvovaginitis	11	genitourinary	black	2179	22213	5.24e-17	1.34882	1.033	1.664	TRUE	614.52	16.2809	assited_income_subset	YES	8
173	Neoplasm of uncertain behavior of skin	2	neoplasms	darkcyan	3837	37468	1.72e-20	1.22289	0.965	1.481	TRUE	173	19.7651	no_health_insurance_subset	YES	8
217.1	Nevus, non-neoplastic	2	neoplasms	darkcyan	1948	32127	1.1e-06	0.876771	0.524	1.229	TRUE	217.1	5.95865	no_health_insurance_subset	YES	8
228.1	Hemangioma of skin and subcutaneous tissue	2	neoplasms	darkcyan	2901	40746	1.43e-10	-1.04141	-1.36	-0.723	TRUE	228.1	9.8461	no_health_insurance_subset	YES	8
272.11	Hypercholesterolemia	3	endocrine/metabolic	brown	8107	19731	8.14e-30	1.3283	1.099	1.558	TRUE	272.11	29.0893	no_health_insurance_subset	YES	8
415	Pulmonary heart disease	8	circulatory system	red	1453	42885	4.45e-06	0.913426	0.523	1.304	TRUE	415	5.35174	no_health_insurance_subset	YES	8
496.21	Obstructive chronic bronchitis	9	respiratory	coral4	541	32082	0.000706	1.10761	0.467	1.749	TRUE	496.21	3.15115	no_health_insurance_subset	NO	8
509.8	Dependence on respirator [Ventilator] or supplemental oxygen	9	respiratory	coral4	320	40896	3.74e-07	2.00512	1.232	2.778	TRUE	509.8	6.42702	no_health_insurance_subset	YES	8
586.2	Cyst of kidney, acquired	11	genitourinary	black	1274	36480	1.9e-08	1.19066	0.775	1.606	TRUE	586.2	7.72059	no_health_insurance_subset	YES	8
599.8	Other symptoms involving urinary system	11	genitourinary	black	1616	27827	6.53e-08	1.02971	0.656	1.403	TRUE	599.8	7.18482	no_health_insurance_subset	YES	8
610	Benign mammary dysplasias	11	genitourinary	black	2327	15553	4.7e-10	1.13841	0.78	1.497	TRUE	610	9.32815	no_health_insurance_subset	YES	8
614	Inflammatory diseases of female pelvic organs	11	genitourinary	black	2978	22213	0.825077	-0.0373404	-0.368	0.294	TRUE	614	0.0835058	no_health_insurance_subset	NO	8
614.5	Inflammatory disease of cervix, vagina, and vulva	11	genitourinary	black	2693	22213	0.918171	-0.0181667	-0.365	0.328	TRUE	614.5	0.0370763	no_health_insurance_subset	NO	8
614.52	Vaginitis and vulvovaginitis	11	genitourinary	black	2179	22213	0.691473	-0.0772103	-0.459	0.304	TRUE	614.52	0.160225	no_health_insurance_subset	NO	8
173	Neoplasm of uncertain behavior of skin	2	neoplasms	darkcyan	3837	37468	6.68e-06	0.701967	0.396	1.007	TRUE	173	5.17527	area_poverty_subset	YES	8
217.1	Nevus, non-neoplastic	2	neoplasms	darkcyan	1948	32127	0.00261319	0.647424	0.226	1.069	TRUE	217.1	2.58283	area_poverty_subset	NO	8
228.1	Hemangioma of skin and subcutaneous tissue	2	neoplasms	darkcyan	2901	40746	0.111181	0.277953	-0.064	0.62	TRUE	228.1	0.953969	area_poverty_subset	NO	8
272.11	Hypercholesterolemia	3	endocrine/metabolic	brown	8107	19731	3.56e-08	0.794092	0.512	1.076	TRUE	272.11	7.44892	area_poverty_subset	YES	8
415	Pulmonary heart disease	8	circulatory system	red	1453	42885	2.87e-05	0.987002	0.525	1.449	TRUE	415	4.54149	area_poverty_subset	NO	8
496.21	Obstructive chronic bronchitis	9	respiratory	coral4	541	32082	0.000207	1.39672	0.659	2.135	TRUE	496.21	3.684	area_poverty_subset	NO	8
509.8	Dependence on respirator [Ventilator] or supplemental oxygen	9	respiratory	coral4	320	40896	5.21e-05	1.87987	0.969	2.791	TRUE	509.8	4.28326	area_poverty_subset	NO	8
586.2	Cyst of kidney, acquired	11	genitourinary	black	1274	36480	1.34e-06	1.22531	0.728	1.722	TRUE	586.2	5.87239	area_poverty_subset	YES	8
599.8	Other symptoms involving urinary system	11	genitourinary	black	1616	27827	2.91e-12	1.5709	1.13	2.012	TRUE	599.8	11.5366	area_poverty_subset	YES	8
610	Benign mammary dysplasias	11	genitourinary	black	2327	15553	2.12e-07	1.08216	0.673	1.491	TRUE	610	6.67383	area_poverty_subset	YES	8
614	Inflammatory diseases of female pelvic organs	11	genitourinary	black	2978	22213	8.55e-14	1.30312	0.961	1.645	TRUE	614	13.0682	area_poverty_subset	YES	8
614.5	Inflammatory disease of cervix, vagina, and vulva	11	genitourinary	black	2693	22213	4.51e-14	1.36991	1.014	1.726	TRUE	614.5	13.3463	area_poverty_subset	YES	8
614.52	Vaginitis and vulvovaginitis	11	genitourinary	black	2179	22213	2.41e-13	1.44931	1.061	1.837	TRUE	614.52	12.6179	area_poverty_subset	YES	8
173	Neoplasm of uncertain behavior of skin	2	neoplasms	darkcyan	3837	37468	0.324257	-0.173885	-0.52	0.172	TRUE	173	0.489111	vacant_housing_subset	NO	8
217.1	Nevus, non-neoplastic	2	neoplasms	darkcyan	1948	32127	0.0172497	-0.592027	-1.079	-0.105	TRUE	217.1	1.76322	vacant_housing_subset	NO	8
228.1	Hemangioma of skin and subcutaneous tissue	2	neoplasms	darkcyan	2901	40746	1.54e-10	-1.40791	-1.839	-0.977	TRUE	228.1	9.81235	vacant_housing_subset	YES	8
272.11	Hypercholesterolemia	3	endocrine/metabolic	brown	8107	19731	3.79e-09	0.908228	0.606	1.21	TRUE	272.11	8.42096	vacant_housing_subset	YES	8
415	Pulmonary heart disease	8	circulatory system	red	1453	42885	1.17e-05	1.04193	0.576	1.508	TRUE	415	4.93117	vacant_housing_subset	NO	8
496.21	Obstructive chronic bronchitis	9	respiratory	coral4	541	32082	2.35e-05	1.55161	0.832	2.271	TRUE	496.21	4.62887	vacant_housing_subset	NO	8
509.8	Dependence on respirator [Ventilator] or supplemental oxygen	9	respiratory	coral4	320	40896	3.35e-07	2.18953	1.349	3.031	TRUE	509.8	6.47516	vacant_housing_subset	YES	8
586.2	Cyst of kidney, acquired	11	genitourinary	black	1274	36480	2.13e-09	1.43924	0.968	1.91	TRUE	586.2	8.67115	vacant_housing_subset	YES	8
599.8	Other symptoms involving urinary system	11	genitourinary	black	1616	27827	2.56e-09	1.32318	0.888	1.759	TRUE	599.8	8.59136	vacant_housing_subset	YES	8
610	Benign mammary dysplasias	11	genitourinary	black	2327	15553	5.24e-05	0.910561	0.469	1.352	TRUE	610	4.28077	vacant_housing_subset	NO	8
614	Inflammatory diseases of female pelvic organs	11	genitourinary	black	2978	22213	0.0809759	0.361548	-0.045	0.768	TRUE	614	1.09164	vacant_housing_subset	NO	8
614.5	Inflammatory disease of cervix, vagina, and vulva	11	genitourinary	black	2693	22213	0.14055	0.319093	-0.105	0.743	TRUE	614.5	0.852169	vacant_housing_subset	NO	8
614.52	Vaginitis and vulvovaginitis	11	genitourinary	black	2179	22213	0.284932	0.254867	-0.212	0.722	TRUE	614.52	0.545259	vacant_housing_subset	NO	8
173	Neoplasm of uncertain behavior of skin	2	neoplasms	darkcyan	3837	37468	4.96e-05	0.568005	0.294	0.842	TRUE	173	4.30434	deprivation_index_subset	NO	8
217.1	Nevus, non-neoplastic	2	neoplasms	darkcyan	1948	32127	0.0143147	0.469801	0.094	0.846	TRUE	217.1	1.84422	deprivation_index_subset	NO	8
228.1	Hemangioma of skin and subcutaneous tissue	2	neoplasms	darkcyan	2901	40746	9.99e-05	-0.614183	-0.924	-0.305	TRUE	228.1	4.0005	deprivation_index_subset	NO	8
272.11	Hypercholesterolemia	3	endocrine/metabolic	brown	8107	19731	2.02e-26	1.35702	1.107	1.607	TRUE	272.11	25.6939	deprivation_index_subset	YES	8
415	Pulmonary heart disease	8	circulatory system	red	1453	42885	1.32e-07	1.10739	0.696	1.519	TRUE	415	6.879	deprivation_index_subset	YES	8
496.21	Obstructive chronic bronchitis	9	respiratory	coral4	541	32082	2.32e-08	1.87028	1.214	2.526	TRUE	496.21	7.63453	deprivation_index_subset	YES	8
509.8	Dependence on respirator [Ventilator] or supplemental oxygen	9	respiratory	coral4	320	40896	3.21e-07	2.15723	1.33	2.985	TRUE	509.8	6.49332	deprivation_index_subset	YES	8
586.2	Cyst of kidney, acquired	11	genitourinary	black	1274	36480	1.36e-12	1.5919	1.152	2.032	TRUE	586.2	11.8668	deprivation_index_subset	YES	8
599.8	Other symptoms involving urinary system	11	genitourinary	black	1616	27827	8.58e-13	1.45132	1.054	1.849	TRUE	599.8	12.0665	deprivation_index_subset	YES	8
610	Benign mammary dysplasias	11	genitourinary	black	2327	15553	1.06e-08	1.09488	0.72	1.47	TRUE	610	7.97286	deprivation_index_subset	YES	8
614	Inflammatory diseases of female pelvic organs	11	genitourinary	black	2978	22213	6.79e-08	0.87755	0.559	1.196	TRUE	614	7.16784	deprivation_index_subset	YES	8
614.5	Inflammatory disease of cervix, vagina, and vulva	11	genitourinary	black	2693	22213	7.91e-08	0.911586	0.579	1.244	TRUE	614.5	7.10166	deprivation_index_subset	YES	8
614.52	Vaginitis and vulvovaginitis	11	genitourinary	black	2179	22213	2.38e-07	0.960233	0.596	1.324	TRUE	614.52	6.62332	deprivation_index_subset	YES	8
217	Vascular hamartomas and non-neoplastic nevi	2	neoplasms	darkcyan	2026	32127	9.13e-34	-2.04808	-2.38	-1.717	TRUE	217	33.0393	SDOH	YES	7
218	Benign neoplasm of uterus	2	neoplasms	darkcyan	2063	21303	0.0232103	-0.328041	-0.611	-0.045	TRUE	218	1.63432	SDOH	NO	7
218.1	Uterine leiomyoma	2	neoplasms	darkcyan	2024	21303	0.0143135	-0.357815	-0.644	-0.071	TRUE	218.1	1.84425	SDOH	NO	7
228	Hemangioma and lymphangioma, any site	2	neoplasms	darkcyan	3426	40746	1.76e-38	-1.69154	-1.947	-1.436	TRUE	228	37.7542	SDOH	YES	7
251.1	Hypoglycemia	3	endocrine/metabolic	brown	548	26243	3.69e-08	1.37548	0.886	1.865	TRUE	251.1	7.43262	SDOH	YES	7
401.3	Other hypertensive complications	8	circulatory system	red	779	23181	9.61e-17	1.86412	1.424	2.304	TRUE	401.3	16.0173	SDOH	YES	7
497	Bronchitis	9	respiratory	coral4	1827	32082	5.68e-25	1.45949	1.182	1.737	TRUE	497	24.2459	SDOH	YES	7
580	Nephritis; nephrosis; renal sclerosis	11	genitourinary	black	590	36480	1.21e-11	1.57678	1.121	2.033	TRUE	580	10.9181	SDOH	YES	7
585.32	End stage renal disease	11	genitourinary	black	365	36480	3.97e-13	2.04376	1.492	2.596	TRUE	585.32	12.401	SDOH	YES	7
599.3	Dysuria	11	genitourinary	black	4067	27827	6.18e-26	1.07957	0.879	1.28	TRUE	599.3	25.2092	SDOH	YES	7
599.5	Frequency of urination and polyuria	11	genitourinary	black	5216	27827	1.13e-07	0.521446	0.329	0.714	TRUE	599.5	6.94581	SDOH	YES	7
619.4	Noninflammatory disorders of vagina	11	genitourinary	black	1868	21018	4.14e-12	0.957918	0.687	1.229	TRUE	619.4	11.3835	SDOH	YES	7
626.8	Infertility, female	11	genitourinary	black	715	12448	3.68e-05	-1.1689	-1.724	-0.614	TRUE	626.8	4.43454	SDOH	NO	7
217	Vascular hamartomas and non-neoplastic nevi	2	neoplasms	darkcyan	2026	32127	4.17e-22	-1.98512	-2.388	-1.583	TRUE	217	21.3794	SCC	YES	7
218	Benign neoplasm of uterus	2	neoplasms	darkcyan	2063	21303	0.784191	-0.0515946	-0.421	0.318	TRUE	218	0.105578	SCC	NO	7
218.1	Uterine leiomyoma	2	neoplasms	darkcyan	2024	21303	0.800845	-0.047901	-0.42	0.324	TRUE	218.1	0.0964515	SCC	NO	7
228	Hemangioma and lymphangioma, any site	2	neoplasms	darkcyan	3426	40746	3.85e-23	-1.57194	-1.883	-1.261	TRUE	228	22.4145	SCC	YES	7
251.1	Hypoglycemia	3	endocrine/metabolic	brown	548	26243	9.68e-07	1.66762	1	2.335	TRUE	251.1	6.01428	SCC	YES	7
401.3	Other hypertensive complications	8	circulatory system	red	779	23181	0.0523794	0.617121	-0.006	1.241	TRUE	401.3	1.28084	SCC	NO	7
497	Bronchitis	9	respiratory	coral4	1827	32082	9.99e-11	1.29253	0.901	1.684	TRUE	497	10.0005	SCC	YES	7
580	Nephritis; nephrosis; renal sclerosis	11	genitourinary	black	590	36480	0.935227	0.0277206	-0.641	0.696	TRUE	580	0.029083	SCC	NO	7
585.32	End stage renal disease	11	genitourinary	black	365	36480	0.692817	0.168795	-0.669	1.006	TRUE	585.32	0.159382	SCC	NO	7
599.3	Dysuria	11	genitourinary	black	4067	27827	5.73e-16	1.12964	0.856	1.403	TRUE	599.3	15.2421	SCC	YES	7
599.5	Frequency of urination and polyuria	11	genitourinary	black	5216	27827	4.07e-12	0.90713	0.651	1.164	TRUE	599.5	11.3908	SCC	YES	7
619.4	Noninflammatory disorders of vagina	11	genitourinary	black	1868	21018	3.14e-06	0.883563	0.512	1.255	TRUE	619.4	5.50348	SCC	YES	7
626.8	Infertility, female	11	genitourinary	black	715	12448	0.000401	-1.17405	-1.824	-0.524	TRUE	626.8	3.39639	SCC	NO	7
217	Vascular hamartomas and non-neoplastic nevi	2	neoplasms	darkcyan	2026	32127	0.0446855	-0.3178	-0.628	-0.008	TRUE	217	1.34983	NBD	NO	7
218	Benign neoplasm of uterus	2	neoplasms	darkcyan	2063	21303	9.81e-09	0.822322	0.541	1.103	TRUE	218	8.00822	NBD	YES	7
218.1	Uterine leiomyoma	2	neoplasms	darkcyan	2024	21303	2.86e-09	0.856468	0.574	1.139	TRUE	218.1	8.54295	NBD	YES	7
228	Hemangioma and lymphangioma, any site	2	neoplasms	darkcyan	3426	40746	0.000965	-0.41255	-0.658	-0.168	TRUE	228	3.0153	NBD	NO	7
251.1	Hypoglycemia	3	endocrine/metabolic	brown	548	26243	0.354059	0.264305	-0.295	0.823	TRUE	251.1	0.450925	NBD	NO	7
401.3	Other hypertensive complications	8	circulatory system	red	779	23181	0.0126224	0.631944	0.135	1.129	TRUE	401.3	1.89886	NBD	NO	7
497	Bronchitis	9	respiratory	coral4	1827	32082	0.0141289	0.400899	0.081	0.721	TRUE	497	1.84989	NBD	NO	7
580	Nephritis; nephrosis; renal sclerosis	11	genitourinary	black	590	36480	4.75e-05	1.0362	0.537	1.535	TRUE	580	4.3234	NBD	NO	7
585.32	End stage renal disease	11	genitourinary	black	365	36480	6.96e-05	1.2561	0.637	1.875	TRUE	585.32	4.15756	NBD	NO	7
599.3	Dysuria	11	genitourinary	black	4067	27827	2.31e-11	0.74717	0.528	0.966	TRUE	599.3	10.6367	NBD	YES	7
599.5	Frequency of urination and polyuria	11	genitourinary	black	5216	27827	2.94e-05	0.443628	0.236	0.652	TRUE	599.5	4.53178	NBD	NO	7
619.4	Noninflammatory disorders of vagina	11	genitourinary	black	1868	21018	3.05e-14	1.10943	0.823	1.396	TRUE	619.4	13.5155	NBD	YES	7
626.8	Infertility, female	11	genitourinary	black	715	12448	2.92e-06	-1.29245	-1.834	-0.751	TRUE	626.8	5.53396	NBD	YES	7
217	Vascular hamartomas and non-neoplastic nevi	2	neoplasms	darkcyan	2026	32127	6.35e-65	-3.46718	-3.867	-3.068	TRUE	217	64.197	ES	YES	7
218	Benign neoplasm of uterus	2	neoplasms	darkcyan	2063	21303	0.440127	-0.106782	-0.378	0.164	TRUE	218	0.356422	ES	NO	7
218.1	Uterine leiomyoma	2	neoplasms	darkcyan	2024	21303	0.46131	-0.102616	-0.376	0.17	TRUE	218.1	0.336007	ES	NO	7
228	Hemangioma and lymphangioma, any site	2	neoplasms	darkcyan	3426	40746	8.11e-78	-2.8586	-3.159	-2.559	TRUE	228	77.091	ES	YES	7
251.1	Hypoglycemia	3	endocrine/metabolic	brown	548	26243	1.38e-16	1.90116	1.45	2.352	TRUE	251.1	15.8589	ES	YES	7
401.3	Other hypertensive complications	8	circulatory system	red	779	23181	4.17e-14	1.72569	1.278	2.173	TRUE	401.3	13.3801	ES	YES	7
497	Bronchitis	9	respiratory	coral4	1827	32082	1.55e-25	1.50481	1.222	1.787	TRUE	497	24.8097	ES	YES	7
580	Nephritis; nephrosis; renal sclerosis	11	genitourinary	black	590	36480	4.2e-10	1.45178	0.996	1.907	TRUE	580	9.37657	ES	YES	7
585.32	End stage renal disease	11	genitourinary	black	365	36480	3.74e-12	1.95493	1.403	2.507	TRUE	585.32	11.4268	ES	YES	7
599.3	Dysuria	11	genitourinary	black	4067	27827	2.53e-41	1.32976	1.136	1.523	TRUE	599.3	40.5967	ES	YES	7
599.5	Frequency of urination and polyuria	11	genitourinary	black	5216	27827	1.25e-21	0.94509	0.751	1.139	TRUE	599.5	20.9047	ES	YES	7
619.4	Noninflammatory disorders of vagina	11	genitourinary	black	1868	21018	3.5e-12	0.904756	0.65	1.16	TRUE	619.4	11.4564	ES	YES	7
626.8	Infertility, female	11	genitourinary	black	715	12448	3.86e-19	-2.56553	-3.128	-2.003	TRUE	626.8	18.4133	ES	YES	7
217	Vascular hamartomas and non-neoplastic nevi	2	neoplasms	darkcyan	2026	32127	5.17e-25	-2.13214	-2.537	-1.728	TRUE	217	24.2862	HCAU	YES	7
218	Benign neoplasm of uterus	2	neoplasms	darkcyan	2063	21303	0.0228793	-0.397651	-0.74	-0.055	TRUE	218	1.64056	HCAU	NO	7
218.1	Uterine leiomyoma	2	neoplasms	darkcyan	2024	21303	0.0212905	-0.405887	-0.751	-0.06	TRUE	218.1	1.67181	HCAU	NO	7
228	Hemangioma and lymphangioma, any site	2	neoplasms	darkcyan	3426	40746	1.1e-28	-1.75488	-2.064	-1.445	TRUE	228	27.9605	HCAU	YES	7
251.1	Hypoglycemia	3	endocrine/metabolic	brown	548	26243	8.09e-14	2.34448	1.729	2.96	TRUE	251.1	13.0918	HCAU	YES	7
401.3	Other hypertensive complications	8	circulatory system	red	779	23181	1.36e-09	1.79545	1.215	2.376	TRUE	401.3	8.86621	HCAU	YES	7
497	Bronchitis	9	respiratory	coral4	1827	32082	1.6e-19	1.69354	1.326	2.061	TRUE	497	18.7952	HCAU	YES	7
580	Nephritis; nephrosis; renal sclerosis	11	genitourinary	black	590	36480	0.0805138	0.569105	-0.069	1.207	TRUE	580	1.09413	HCAU	NO	7
585.32	End stage renal disease	11	genitourinary	black	365	36480	0.0863783	0.702473	-0.1	1.505	TRUE	585.32	1.0636	HCAU	NO	7
599.3	Dysuria	11	genitourinary	black	4067	27827	6.45e-30	1.46027	1.208	1.712	TRUE	599.3	29.1908	HCAU	YES	7
599.5	Frequency of urination and polyuria	11	genitourinary	black	5216	27827	8.48e-19	1.10067	0.857	1.344	TRUE	599.5	18.0718	HCAU	YES	7
619.4	Noninflammatory disorders of vagina	11	genitourinary	black	1868	21018	5.75e-06	0.786592	0.447	1.127	TRUE	619.4	5.24015	HCAU	YES	7
626.8	Infertility, female	11	genitourinary	black	715	12448	1.77e-07	-1.57254	-2.163	-0.982	TRUE	626.8	6.75298	HCAU	YES	7
217	Vascular hamartomas and non-neoplastic nevi	2	neoplasms	darkcyan	2026	31399	7.81e-74	-1.93551	-2.144	-1.727	TRUE	217	73.1074	education	YES	7
218	Benign neoplasm of uterus	2	neoplasms	darkcyan	2063	20929	2.46e-06	-0.445489	-0.631	-0.26	TRUE	218	5.60908	education	YES	7
218.1	Uterine leiomyoma	2	neoplasms	darkcyan	2024	20929	1.22e-06	-0.463208	-0.65	-0.276	TRUE	218.1	5.91218	education	YES	7
228	Hemangioma and lymphangioma, any site	2	neoplasms	darkcyan	3426	40018	6.39e-86	-1.58892	-1.747	-1.43	TRUE	228	85.1944	education	YES	7
251.1	Hypoglycemia	3	endocrine/metabolic	brown	548	25515	4.49e-11	1.11268	0.782	1.444	TRUE	251.1	10.3475	education	YES	7
401.3	Other hypertensive complications	8	circulatory system	red	779	22453	4.84e-25	1.52736	1.238	1.817	TRUE	401.3	24.3153	education	YES	7
497	Bronchitis	9	respiratory	coral4	1827	31354	5.29e-27	1.02082	0.835	1.207	TRUE	497	26.2766	education	YES	7
580	Nephritis; nephrosis; renal sclerosis	11	genitourinary	black	590	35752	6.43e-14	1.18903	0.878	1.5	TRUE	580	13.1917	education	YES	7
585.32	End stage renal disease	11	genitourinary	black	365	35752	5.17e-14	1.49227	1.104	1.881	TRUE	585.32	13.2865	education	YES	7
599.3	Dysuria	11	genitourinary	black	4067	27099	2.68e-29	0.764767	0.631	0.898	TRUE	599.3	28.5716	education	YES	7
599.5	Frequency of urination and polyuria	11	genitourinary	black	5216	27099	2.76e-07	0.32263	0.2	0.446	TRUE	599.5	6.55832	education	YES	7
619.4	Noninflammatory disorders of vagina	11	genitourinary	black	1868	20644	8.19e-09	0.548111	0.362	0.734	TRUE	619.4	8.08666	education	YES	7
626.8	Infertility, female	11	genitourinary	black	715	12074	2.1e-16	-1.53556	-1.902	-1.169	TRUE	626.8	15.6772	education	YES	7
217	Vascular hamartomas and non-neoplastic nevi	2	neoplasms	darkcyan	2026	32127	8.92e-05	-0.601452	-0.902	-0.301	TRUE	217	4.04973	median_income_subset	NO	7
218	Benign neoplasm of uterus	2	neoplasms	darkcyan	2063	21303	0.547833	-0.100162	-0.427	0.226	TRUE	218	0.261352	median_income_subset	NO	7
218.1	Uterine leiomyoma	2	neoplasms	darkcyan	2024	21303	0.557386	-0.0986184	-0.428	0.231	TRUE	218.1	0.253844	median_income_subset	NO	7
228	Hemangioma and lymphangioma, any site	2	neoplasms	darkcyan	3426	40746	4.2e-05	-0.480477	-0.71	-0.251	TRUE	228	4.37705	median_income_subset	NO	7
251.1	Hypoglycemia	3	endocrine/metabolic	brown	548	26243	7.07e-10	2.2229	1.516	2.93	TRUE	251.1	9.15046	median_income_subset	YES	7
401.3	Other hypertensive complications	8	circulatory system	red	779	23181	1.01e-07	1.53513	0.97	2.1	TRUE	401.3	6.99491	median_income_subset	YES	7
497	Bronchitis	9	respiratory	coral4	1827	32082	1.92e-07	0.938903	0.585	1.292	TRUE	497	6.71636	median_income_subset	YES	7
580	Nephritis; nephrosis; renal sclerosis	11	genitourinary	black	590	36480	0.00271051	0.905841	0.314	1.498	TRUE	580	2.56695	median_income_subset	NO	7
585.32	End stage renal disease	11	genitourinary	black	365	36480	0.000226	1.48572	0.696	2.275	TRUE	585.32	3.64603	median_income_subset	NO	7
599.3	Dysuria	11	genitourinary	black	4067	27827	1.07e-23	1.3649	1.098	1.631	TRUE	599.3	22.97	median_income_subset	YES	7
599.5	Frequency of urination and polyuria	11	genitourinary	black	5216	27827	9.06e-15	0.881644	0.659	1.105	TRUE	599.5	14.043	median_income_subset	YES	7
619.4	Noninflammatory disorders of vagina	11	genitourinary	black	1868	21018	9.95e-06	0.839569	0.467	1.212	TRUE	619.4	5.00207	median_income_subset	NO	7
626.8	Infertility, female	11	genitourinary	black	715	12448	1.19e-13	-1.8672	-2.361	-1.374	TRUE	626.8	12.9227	median_income_subset	YES	7
217	Vascular hamartomas and non-neoplastic nevi	2	neoplasms	darkcyan	2026	32127	9.69e-08	0.98203	0.621	1.343	TRUE	217	7.01381	high_school_education_subset	YES	7
218	Benign neoplasm of uterus	2	neoplasms	darkcyan	2063	21303	1.55e-18	1.59652	1.24	1.953	TRUE	218	17.8105	high_school_education_subset	YES	7
218.1	Uterine leiomyoma	2	neoplasms	darkcyan	2024	21303	2.8e-19	1.64023	1.282	1.998	TRUE	218.1	18.5522	high_school_education_subset	YES	7
228	Hemangioma and lymphangioma, any site	2	neoplasms	darkcyan	3426	40746	0.00385951	-0.436636	-0.733	-0.14	TRUE	228	2.41347	high_school_education_subset	NO	7
251.1	Hypoglycemia	3	endocrine/metabolic	brown	548	26243	0.73254	-0.124666	-0.84	0.59	TRUE	251.1	0.135169	high_school_education_subset	NO	7
401.3	Other hypertensive complications	8	circulatory system	red	779	23181	0.190136	0.401541	-0.199	1.002	TRUE	401.3	0.720936	high_school_education_subset	NO	7
497	Bronchitis	9	respiratory	coral4	1827	32082	0.059334	-0.390425	-0.796	0.015	TRUE	497	1.2267	high_school_education_subset	NO	7
580	Nephritis; nephrosis; renal sclerosis	11	genitourinary	black	590	36480	2.31e-09	1.80175	1.211	2.393	TRUE	580	8.6371	high_school_education_subset	YES	7
585.32	End stage renal disease	11	genitourinary	black	365	36480	4.41e-08	2.05145	1.317	2.786	TRUE	585.32	7.35588	high_school_education_subset	YES	7
599.3	Dysuria	11	genitourinary	black	4067	27827	0.00444135	-0.420586	-0.71	-0.131	TRUE	599.3	2.35248	high_school_education_subset	NO	7
599.5	Frequency of urination and polyuria	11	genitourinary	black	5216	27827	2.62e-05	-0.559656	-0.821	-0.299	TRUE	599.5	4.58187	high_school_education_subset	NO	7
619.4	Noninflammatory disorders of vagina	11	genitourinary	black	1868	21018	0.00180027	0.623318	0.232	1.015	TRUE	619.4	2.74466	high_school_education_subset	NO	7
626.8	Infertility, female	11	genitourinary	black	715	12448	0.0418426	-0.69252	-1.359	-0.026	TRUE	626.8	1.37838	high_school_education_subset	NO	7
217	Vascular hamartomas and non-neoplastic nevi	2	neoplasms	darkcyan	2026	32127	9.97e-06	0.767911	0.427	1.109	TRUE	217	5.00126	assited_income_subset	NO	7
218	Benign neoplasm of uterus	2	neoplasms	darkcyan	2063	21303	2.83e-16	1.30947	0.996	1.623	TRUE	218	15.5478	assited_income_subset	YES	7
218.1	Uterine leiomyoma	2	neoplasms	darkcyan	2024	21303	1.18e-16	1.33598	1.02	1.652	TRUE	218.1	15.928	assited_income_subset	YES	7
228	Hemangioma and lymphangioma, any site	2	neoplasms	darkcyan	3426	40746	0.57797	0.0778041	-0.196	0.352	TRUE	228	0.238094	assited_income_subset	NO	7
251.1	Hypoglycemia	3	endocrine/metabolic	brown	548	26243	0.155847	0.477581	-0.182	1.137	TRUE	251.1	0.807301	assited_income_subset	NO	7
401.3	Other hypertensive complications	8	circulatory system	red	779	23181	5.63e-11	1.73219	1.214	2.25	TRUE	401.3	10.2495	assited_income_subset	YES	7
497	Bronchitis	9	respiratory	coral4	1827	32082	0.289869	0.198512	-0.169	0.566	TRUE	497	0.537798	assited_income_subset	NO	7
580	Nephritis; nephrosis; renal sclerosis	11	genitourinary	black	590	36480	1.45e-09	1.69448	1.146	2.243	TRUE	580	8.83837	assited_income_subset	YES	7
585.32	End stage renal disease	11	genitourinary	black	365	36480	6.37e-09	2.02223	1.34	2.705	TRUE	585.32	8.19563	assited_income_subset	YES	7
599.3	Dysuria	11	genitourinary	black	4067	27827	0.56378	0.0786929	-0.189	0.346	TRUE	599.3	0.24889	assited_income_subset	NO	7
599.5	Frequency of urination and polyuria	11	genitourinary	black	5216	27827	0.00329996	0.360741	0.12	0.601	TRUE	599.5	2.48149	assited_income_subset	NO	7
619.4	Noninflammatory disorders of vagina	11	genitourinary	black	1868	21018	2.89e-05	0.7372	0.392	1.083	TRUE	619.4	4.53859	assited_income_subset	NO	7
626.8	Infertility, female	11	genitourinary	black	715	12448	0.0516468	-0.620553	-1.246	0.004	TRUE	626.8	1.28696	assited_income_subset	NO	7
217	Vascular hamartomas and non-neoplastic nevi	2	neoplasms	darkcyan	2026	32127	5.23e-06	0.807464	0.46	1.155	TRUE	217	5.28111	no_health_insurance_subset	YES	7
218	Benign neoplasm of uterus	2	neoplasms	darkcyan	2063	21303	6.68e-07	0.919053	0.557	1.281	TRUE	218	6.17553	no_health_insurance_subset	YES	7
218.1	Uterine leiomyoma	2	neoplasms	darkcyan	2024	21303	4.05e-07	0.943116	0.578	1.308	TRUE	218.1	6.39233	no_health_insurance_subset	YES	7
228	Hemangioma and lymphangioma, any site	2	neoplasms	darkcyan	3426	40746	2.58e-08	-0.825273	-1.116	-0.535	TRUE	228	7.58853	no_health_insurance_subset	YES	7
251.1	Hypoglycemia	3	endocrine/metabolic	brown	548	26243	0.209729	0.426163	-0.24	1.092	TRUE	251.1	0.678341	no_health_insurance_subset	NO	7
401.3	Other hypertensive complications	8	circulatory system	red	779	23181	0.571573	-0.178015	-0.795	0.439	TRUE	401.3	0.242928	no_health_insurance_subset	NO	7
497	Bronchitis	9	respiratory	coral4	1827	32082	2.05e-06	-0.999695	-1.412	-0.587	TRUE	497	5.68779	no_health_insurance_subset	YES	7
580	Nephritis; nephrosis; renal sclerosis	11	genitourinary	black	590	36480	1.35e-05	1.32678	0.729	1.924	TRUE	580	4.87019	no_health_insurance_subset	NO	7
585.32	End stage renal disease	11	genitourinary	black	365	36480	7.22e-12	2.4602	1.757	3.164	TRUE	585.32	11.1417	no_health_insurance_subset	YES	7
599.3	Dysuria	11	genitourinary	black	4067	27827	3.32e-05	-0.596134	-0.878	-0.315	TRUE	599.3	4.47831	no_health_insurance_subset	NO	7
599.5	Frequency of urination and polyuria	11	genitourinary	black	5216	27827	4.87e-09	-0.748573	-0.999	-0.498	TRUE	599.5	8.31278	no_health_insurance_subset	YES	7
619.4	Noninflammatory disorders of vagina	11	genitourinary	black	1868	21018	0.645366	0.0904604	-0.295	0.476	TRUE	619.4	0.190194	no_health_insurance_subset	NO	7
626.8	Infertility, female	11	genitourinary	black	715	12448	3.12e-08	-2.00899	-2.72	-1.298	TRUE	626.8	7.5057	no_health_insurance_subset	YES	7
217	Vascular hamartomas and non-neoplastic nevi	2	neoplasms	darkcyan	2026	32127	0.00395742	0.608665	0.195	1.023	TRUE	217	2.40259	area_poverty_subset	NO	7
218	Benign neoplasm of uterus	2	neoplasms	darkcyan	2063	21303	1.73e-10	1.2654	0.877	1.654	TRUE	218	9.76083	area_poverty_subset	YES	7
218.1	Uterine leiomyoma	2	neoplasms	darkcyan	2024	21303	4.33e-11	1.31717	0.926	1.709	TRUE	218.1	10.3633	area_poverty_subset	YES	7
228	Hemangioma and lymphangioma, any site	2	neoplasms	darkcyan	3426	40746	0.0233081	0.365589	0.05	0.681	TRUE	228	1.63249	area_poverty_subset	NO	7
251.1	Hypoglycemia	3	endocrine/metabolic	brown	548	26243	0.306455	0.406489	-0.373	1.186	TRUE	251.1	0.513634	area_poverty_subset	NO	7
401.3	Other hypertensive complications	8	circulatory system	red	779	23181	0.000484	1.16743	0.512	1.823	TRUE	401.3	3.31555	area_poverty_subset	NO	7
497	Bronchitis	9	respiratory	coral4	1827	32082	0.014978	-0.548941	-0.991	-0.107	TRUE	497	1.82455	area_poverty_subset	NO	7
580	Nephritis; nephrosis; renal sclerosis	11	genitourinary	black	590	36480	2.82e-06	1.65752	0.964	2.351	TRUE	580	5.54949	area_poverty_subset	YES	7
585.32	End stage renal disease	11	genitourinary	black	365	36480	6.84e-05	1.79654	0.912	2.681	TRUE	585.32	4.165	area_poverty_subset	NO	7
599.3	Dysuria	11	genitourinary	black	4067	27827	0.0102426	0.407357	0.096	0.718	TRUE	599.3	1.98959	area_poverty_subset	NO	7
599.5	Frequency of urination and polyuria	11	genitourinary	black	5216	27827	0.00189255	0.44661	0.165	0.728	TRUE	599.5	2.72295	area_poverty_subset	NO	7
619.4	Noninflammatory disorders of vagina	11	genitourinary	black	1868	21018	9.09e-12	1.42199	1.013	1.831	TRUE	619.4	11.0413	area_poverty_subset	YES	7
626.8	Infertility, female	11	genitourinary	black	715	12448	7.52e-05	-1.496	-2.237	-0.755	TRUE	626.8	4.12395	area_poverty_subset	NO	7
217	Vascular hamartomas and non-neoplastic nevi	2	neoplasms	darkcyan	2026	32127	0.00264634	-0.744023	-1.229	-0.259	TRUE	217	2.57735	vacant_housing_subset	NO	7
218	Benign neoplasm of uterus	2	neoplasms	darkcyan	2063	21303	0.555967	0.140335	-0.327	0.607	TRUE	218	0.254951	vacant_housing_subset	NO	7
218.1	Uterine leiomyoma	2	neoplasms	darkcyan	2024	21303	0.602339	0.125434	-0.346	0.597	TRUE	218.1	0.220159	vacant_housing_subset	NO	7
228	Hemangioma and lymphangioma, any site	2	neoplasms	darkcyan	3426	40746	2.14e-07	-1.01998	-1.405	-0.635	TRUE	228	6.6686	vacant_housing_subset	YES	7
251.1	Hypoglycemia	3	endocrine/metabolic	brown	548	26243	9.63e-08	1.83677	1.162	2.512	TRUE	251.1	7.01622	vacant_housing_subset	YES	7
401.3	Other hypertensive complications	8	circulatory system	red	779	23181	1.41e-07	1.68041	1.055	2.306	TRUE	401.3	6.85191	vacant_housing_subset	YES	7
497	Bronchitis	9	respiratory	coral4	1827	32082	0.00503925	0.665788	0.2	1.131	TRUE	497	2.29763	vacant_housing_subset	NO	7
580	Nephritis; nephrosis; renal sclerosis	11	genitourinary	black	590	36480	0.0378079	0.79311	0.045	1.542	TRUE	580	1.42242	vacant_housing_subset	NO	7
585.32	End stage renal disease	11	genitourinary	black	365	36480	0.000424	1.54094	0.684	2.398	TRUE	585.32	3.37306	vacant_housing_subset	NO	7
599.3	Dysuria	11	genitourinary	black	4067	27827	0.449301	0.135166	-0.215	0.485	TRUE	599.3	0.347462	vacant_housing_subset	NO	7
599.5	Frequency of urination and polyuria	11	genitourinary	black	5216	27827	0.236488	0.185306	-0.121	0.492	TRUE	599.5	0.62619	vacant_housing_subset	NO	7
619.4	Noninflammatory disorders of vagina	11	genitourinary	black	1868	21018	0.800591	-0.0641291	-0.562	0.433	TRUE	619.4	0.096589	vacant_housing_subset	NO	7
626.8	Infertility, female	11	genitourinary	black	715	12448	0.000205	-1.7812	-2.721	-0.841	TRUE	626.8	3.6893	vacant_housing_subset	NO	7
217	Vascular hamartomas and non-neoplastic nevi	2	neoplasms	darkcyan	2026	32127	0.0260919	0.419151	0.05	0.788	TRUE	217	1.58349	deprivation_index_subset	NO	7
218	Benign neoplasm of uterus	2	neoplasms	darkcyan	2063	21303	3.19e-09	1.09845	0.735	1.462	TRUE	218	8.49652	deprivation_index_subset	YES	7
218.1	Uterine leiomyoma	2	neoplasms	darkcyan	2024	21303	1.46e-09	1.13178	0.765	1.498	TRUE	218.1	8.83705	deprivation_index_subset	YES	7
228	Hemangioma and lymphangioma, any site	2	neoplasms	darkcyan	3426	40746	0.00510117	-0.407602	-0.693	-0.122	TRUE	228	2.29233	deprivation_index_subset	NO	7
251.1	Hypoglycemia	3	endocrine/metabolic	brown	548	26243	0.00236369	1.06004	0.377	1.743	TRUE	251.1	2.62641	deprivation_index_subset	NO	7
401.3	Other hypertensive complications	8	circulatory system	red	779	23181	1.14e-05	1.31916	0.73	1.908	TRUE	401.3	4.94206	deprivation_index_subset	NO	7
497	Bronchitis	9	respiratory	coral4	1827	32082	0.927039	0.0180928	-0.369	0.405	TRUE	497	0.0329019	deprivation_index_subset	NO	7
580	Nephritis; nephrosis; renal sclerosis	11	genitourinary	black	590	36480	4.01e-08	1.76096	1.132	2.39	TRUE	580	7.3966	deprivation_index_subset	YES	7
585.32	End stage renal disease	11	genitourinary	black	365	36480	1.19e-09	2.43742	1.652	3.223	TRUE	585.32	8.92309	deprivation_index_subset	YES	7
599.3	Dysuria	11	genitourinary	black	4067	27827	0.0328587	0.303763	0.025	0.583	TRUE	599.3	1.48335	deprivation_index_subset	NO	7
599.5	Frequency of urination and polyuria	11	genitourinary	black	5216	27827	0.118067	0.199255	-0.051	0.449	TRUE	599.5	0.927871	deprivation_index_subset	NO	7
619.4	Noninflammatory disorders of vagina	11	genitourinary	black	1868	21018	1.46e-05	0.845642	0.463	1.228	TRUE	619.4	4.83647	deprivation_index_subset	NO	7
626.8	Infertility, female	11	genitourinary	black	715	12448	1.92e-07	-1.72593	-2.376	-1.076	TRUE	626.8	6.71758	deprivation_index_subset	YES	7
172	Skin cancer	2	neoplasms	darkcyan	4069	37468	9.04e-22	-1.14862	-1.383	-0.914	TRUE	172	21.044	SDOH	YES	6
172.2	Other non-epithelial cancer of skin	2	neoplasms	darkcyan	3276	37468	4.7e-16	-1.06831	-1.326	-0.81	TRUE	172.2	15.328	SDOH	YES	6
172.21	Basal cell carcinoma	2	neoplasms	darkcyan	2171	37468	2.73e-13	-1.15182	-1.461	-0.843	TRUE	172.21	12.5637	SDOH	YES	6
411.2	Myocardial infarction	8	circulatory system	red	1513	37728	3.04e-22	1.51787	1.211	1.825	TRUE	411.2	21.5166	SDOH	YES	6
415.2	Chronic pulmonary heart disease	8	circulatory system	red	539	42885	1.03e-06	1.20509	0.722	1.689	TRUE	415.2	5.98692	SDOH	YES	6
416	Cardiomegaly	8	circulatory system	red	1216	42885	0.000163	0.664632	0.319	1.01	TRUE	416	3.78707	SDOH	NO	6
479	Other upper respiratory disease	9	respiratory	coral4	3696	22958	0.0121617	0.285897	0.062	0.509	TRUE	479	1.91501	SDOH	NO	6
483	Acute bronchitis and bronchiolitis	9	respiratory	coral4	2769	35749	1.96e-15	0.965744	0.727	1.204	TRUE	483	14.7067	SDOH	YES	6
495.2	Asthma with exacerbation	9	respiratory	coral4	1925	32082	6.46e-22	1.30446	1.039	1.57	TRUE	495.2	21.1895	SDOH	YES	6
512.1	Wheezing	9	respiratory	coral4	871	21607	2.99e-23	2.01642	1.619	2.414	TRUE	512.1	22.5236	SDOH	YES	6
585.4	Chronic kidney disease, Stage I or II	11	genitourinary	black	904	36480	1.83e-08	1.13922	0.742	1.536	TRUE	585.4	7.73743	SDOH	YES	6
590	Pyelonephritis	11	genitourinary	black	567	32116	3.72e-17	1.91803	1.472	2.364	TRUE	590	16.4294	SDOH	YES	6
593.2	Microscopic hematuria	11	genitourinary	black	719	32116	0.570308	0.137218	-0.337	0.611	TRUE	593.2	0.243891	SDOH	NO	6
627	Menopausal and postmenopausal disorders	11	genitourinary	black	7331	12448	3.88e-05	-0.423232	-0.625	-0.222	TRUE	627	4.41115	SDOH	NO	6
627.2	Symptomatic menopause	11	genitourinary	black	3417	12448	0.00720258	-0.36634	-0.634	-0.099	TRUE	627.2	2.14251	SDOH	NO	6
796	Elevated prostate specific antigen [PSA]	11	genitourinary	black	2262	9232	0.0805336	-0.312882	-0.664	0.038	TRUE	796	1.09402	SDOH	NO	6
172	Skin cancer	2	neoplasms	darkcyan	4069	37468	2.66e-25	-1.62328	-1.929	-1.317	TRUE	172	24.5758	SCC	YES	6
172.2	Other non-epithelial cancer of skin	2	neoplasms	darkcyan	3276	37468	1.15e-19	-1.57152	-1.911	-1.232	TRUE	172.2	18.9402	SCC	YES	6
172.21	Basal cell carcinoma	2	neoplasms	darkcyan	2171	37468	1.14e-14	-1.59168	-1.996	-1.188	TRUE	172.21	13.9435	SCC	YES	6
411.2	Myocardial infarction	8	circulatory system	red	1513	37728	4.61e-06	1.02816	0.588	1.468	TRUE	411.2	5.33605	SCC	YES	6
415.2	Chronic pulmonary heart disease	8	circulatory system	red	539	42885	0.112486	0.565154	-0.133	1.263	TRUE	415.2	0.948902	SCC	NO	6
416	Cardiomegaly	8	circulatory system	red	1216	42885	0.0392981	0.497676	0.024	0.971	TRUE	416	1.40563	SCC	NO	6
479	Other upper respiratory disease	9	respiratory	coral4	3696	22958	2.06e-12	1.05856	0.763	1.354	TRUE	479	11.6866	SCC	YES	6
483	Acute bronchitis and bronchiolitis	9	respiratory	coral4	2769	35749	0.000319	0.595228	0.271	0.919	TRUE	483	3.49681	SCC	NO	6
495.2	Asthma with exacerbation	9	respiratory	coral4	1925	32082	7.38e-14	1.41067	1.041	1.78	TRUE	495.2	13.1322	SCC	YES	6
512.1	Wheezing	9	respiratory	coral4	871	21607	9.46e-07	1.43519	0.861	2.009	TRUE	512.1	6.02389	SCC	YES	6
585.4	Chronic kidney disease, Stage I or II	11	genitourinary	black	904	36480	0.00253681	0.842764	0.296	1.39	TRUE	585.4	2.59571	SCC	NO	6
590	Pyelonephritis	11	genitourinary	black	567	32116	4.22e-08	1.7894	1.15	2.429	TRUE	590	7.37466	SCC	YES	6
593.2	Microscopic hematuria	11	genitourinary	black	719	32116	0.157678	-0.461855	-1.103	0.179	TRUE	593.2	0.802228	SCC	NO	6
627	Menopausal and postmenopausal disorders	11	genitourinary	black	7331	12448	5.06e-05	-0.56403	-0.837	-0.291	TRUE	627	4.29624	SCC	NO	6
627.2	Symptomatic menopause	11	genitourinary	black	3417	12448	7.8e-06	-0.832458	-1.197	-0.468	TRUE	627.2	5.10817	SCC	NO	6
796	Elevated prostate specific antigen [PSA]	11	genitourinary	black	2262	9232	0.000685	-0.788842	-1.244	-0.334	TRUE	796	3.16449	SCC	NO	6
172	Skin cancer	2	neoplasms	darkcyan	4069	37468	3.58e-05	-0.511212	-0.754	-0.269	TRUE	172	4.44615	NBD	NO	6
172.2	Other non-epithelial cancer of skin	2	neoplasms	darkcyan	3276	37468	0.00489458	-0.382681	-0.649	-0.116	TRUE	172.2	2.31028	NBD	NO	6
172.21	Basal cell carcinoma	2	neoplasms	darkcyan	2171	37468	0.00526071	-0.454321	-0.773	-0.135	TRUE	172.21	2.27896	NBD	NO	6
411.2	Myocardial infarction	8	circulatory system	red	1513	37728	5.82e-05	0.712385	0.365	1.06	TRUE	411.2	4.23495	NBD	NO	6
415.2	Chronic pulmonary heart disease	8	circulatory system	red	539	42885	0.0122366	0.69345	0.151	1.236	TRUE	415.2	1.91234	NBD	NO	6
416	Cardiomegaly	8	circulatory system	red	1216	42885	0.000116	0.723392	0.356	1.091	TRUE	416	3.93486	NBD	NO	6
479	Other upper respiratory disease	9	respiratory	coral4	3696	22958	0.0826725	0.213072	-0.028	0.454	TRUE	479	1.08264	NBD	NO	6
483	Acute bronchitis and bronchiolitis	9	respiratory	coral4	2769	35749	0.322212	0.13441	-0.132	0.401	TRUE	483	0.491858	NBD	NO	6
495.2	Asthma with exacerbation	9	respiratory	coral4	1925	32082	2.74e-07	0.768812	0.476	1.062	TRUE	495.2	6.56175	NBD	YES	6
512.1	Wheezing	9	respiratory	coral4	871	21607	0.00251307	0.725744	0.255	1.196	TRUE	512.1	2.5998	NBD	NO	6
585.4	Chronic kidney disease, Stage I or II	11	genitourinary	black	904	36480	0.00830334	0.587603	0.151	1.024	TRUE	585.4	2.08075	NBD	NO	6
590	Pyelonephritis	11	genitourinary	black	567	32116	3.11e-07	1.30197	0.803	1.801	TRUE	590	6.5071	NBD	YES	6
593.2	Microscopic hematuria	11	genitourinary	black	719	32116	0.0574531	0.474901	-0.015	0.965	TRUE	593.2	1.24069	NBD	NO	6
627	Menopausal and postmenopausal disorders	11	genitourinary	black	7331	12448	1.04e-08	-0.648254	-0.87	-0.426	TRUE	627	7.98239	NBD	YES	6
627.2	Symptomatic menopause	11	genitourinary	black	3417	12448	2.89e-10	-0.972398	-1.275	-0.67	TRUE	627.2	9.53863	NBD	YES	6
796	Elevated prostate specific antigen [PSA]	11	genitourinary	black	2262	9232	0.581805	0.101172	-0.259	0.461	TRUE	796	0.235222	NBD	NO	6
172	Skin cancer	2	neoplasms	darkcyan	4069	37468	8.48e-61	-2.42223	-2.711	-2.134	TRUE	172	60.0715	ES	YES	6
172.2	Other non-epithelial cancer of skin	2	neoplasms	darkcyan	3276	37468	2.44e-45	-2.29889	-2.618	-1.98	TRUE	172.2	44.613	ES	YES	6
172.21	Basal cell carcinoma	2	neoplasms	darkcyan	2171	37468	1.11e-38	-2.59313	-2.984	-2.202	TRUE	172.21	37.953	ES	YES	6
411.2	Myocardial infarction	8	circulatory system	red	1513	37728	4.36e-32	1.89722	1.582	2.213	TRUE	411.2	31.3608	ES	YES	6
415.2	Chronic pulmonary heart disease	8	circulatory system	red	539	42885	1.36e-12	1.70207	1.231	2.173	TRUE	415.2	11.8649	ES	YES	6
416	Cardiomegaly	8	circulatory system	red	1216	42885	4.78e-05	0.737615	0.382	1.093	TRUE	416	4.32023	ES	NO	6
479	Other upper respiratory disease	9	respiratory	coral4	3696	22958	4.6e-05	0.455226	0.236	0.674	TRUE	479	4.33719	ES	NO	6
483	Acute bronchitis and bronchiolitis	9	respiratory	coral4	2769	35749	1.69e-14	0.919952	0.685	1.155	TRUE	483	13.7711	ES	YES	6
495.2	Asthma with exacerbation	9	respiratory	coral4	1925	32082	4.6e-29	1.46493	1.208	1.722	TRUE	495.2	28.3372	ES	YES	6
512.1	Wheezing	9	respiratory	coral4	871	21607	1.9e-14	1.61258	1.2	2.025	TRUE	512.1	13.7216	ES	YES	6
585.4	Chronic kidney disease, Stage I or II	11	genitourinary	black	904	36480	2.76e-10	1.30328	0.899	1.708	TRUE	585.4	9.5587	ES	YES	6
590	Pyelonephritis	11	genitourinary	black	567	32116	1.01e-18	1.90811	1.485	2.331	TRUE	590	17.9946	ES	YES	6
593.2	Microscopic hematuria	11	genitourinary	black	719	32116	0.0415694	-0.550765	-1.08	-0.021	TRUE	593.2	1.38123	ES	NO	6
627	Menopausal and postmenopausal disorders	11	genitourinary	black	7331	12448	3.21e-22	-1.05448	-1.268	-0.841	TRUE	627	21.4932	ES	YES	6
627.2	Symptomatic menopause	11	genitourinary	black	3417	12448	6.23e-29	-1.72994	-2.034	-1.426	TRUE	627.2	28.2052	ES	YES	6
796	Elevated prostate specific antigen [PSA]	11	genitourinary	black	2262	9232	2.11e-05	-0.883952	-1.291	-0.477	TRUE	796	4.67596	ES	NO	6
172	Skin cancer	2	neoplasms	darkcyan	4069	37468	5.28e-27	-1.69368	-2.002	-1.385	TRUE	172	26.2774	HCAU	YES	6
172.2	Other non-epithelial cancer of skin	2	neoplasms	darkcyan	3276	37468	4.25e-25	-1.833	-2.18	-1.486	TRUE	172.2	24.3715	HCAU	YES	6
172.21	Basal cell carcinoma	2	neoplasms	darkcyan	2171	37468	4.64e-23	-2.12574	-2.547	-1.704	TRUE	172.21	22.333	HCAU	YES	6
411.2	Myocardial infarction	8	circulatory system	red	1513	37728	8.21e-16	1.73843	1.315	2.162	TRUE	411.2	15.0859	HCAU	YES	6
415.2	Chronic pulmonary heart disease	8	circulatory system	red	539	42885	3.45e-07	1.67256	1.029	2.316	TRUE	415.2	6.46238	HCAU	YES	6
416	Cardiomegaly	8	circulatory system	red	1216	42885	0.00421373	0.674286	0.212	1.136	TRUE	416	2.37533	HCAU	NO	6
479	Other upper respiratory disease	9	respiratory	coral4	3696	22958	7.57e-19	1.24661	0.971	1.522	TRUE	479	18.1212	HCAU	YES	6
483	Acute bronchitis and bronchiolitis	9	respiratory	coral4	2769	35749	1.11e-09	0.952329	0.646	1.259	TRUE	483	8.95454	HCAU	YES	6
495.2	Asthma with exacerbation	9	respiratory	coral4	1925	32082	8.78e-24	1.74685	1.406	2.087	TRUE	495.2	23.0567	HCAU	YES	6
512.1	Wheezing	9	respiratory	coral4	871	21607	7.3e-14	2.04296	1.508	2.578	TRUE	512.1	13.1366	HCAU	YES	6
585.4	Chronic kidney disease, Stage I or II	11	genitourinary	black	904	36480	0.0120743	0.69266	0.152	1.234	TRUE	585.4	1.91814	HCAU	NO	6
590	Pyelonephritis	11	genitourinary	black	567	32116	5.42e-12	2.07111	1.482	2.66	TRUE	590	11.2661	HCAU	YES	6
593.2	Microscopic hematuria	11	genitourinary	black	719	32116	0.262066	-0.354687	-0.975	0.265	TRUE	593.2	0.581589	HCAU	NO	6
627	Menopausal and postmenopausal disorders	11	genitourinary	black	7331	12448	9.71e-06	-0.563405	-0.813	-0.314	TRUE	627	5.0127	HCAU	NO	6
627.2	Symptomatic menopause	11	genitourinary	black	3417	12448	1.26e-07	-0.902801	-1.238	-0.568	TRUE	627.2	6.89889	HCAU	YES	6
796	Elevated prostate specific antigen [PSA]	11	genitourinary	black	2262	9232	0.0931656	-0.404434	-0.877	0.068	TRUE	796	1.03074	HCAU	NO	6
172	Skin cancer	2	neoplasms	darkcyan	4069	36740	1.05e-48	-1.08438	-1.229	-0.939	TRUE	172	47.9805	education	YES	6
172.2	Other non-epithelial cancer of skin	2	neoplasms	darkcyan	3276	36740	7.51e-39	-1.06202	-1.222	-0.902	TRUE	172.2	38.1245	education	YES	6
172.21	Basal cell carcinoma	2	neoplasms	darkcyan	2171	36740	3.45e-32	-1.15457	-1.346	-0.963	TRUE	172.21	31.462	education	YES	6
411.2	Myocardial infarction	8	circulatory system	red	1513	37000	2.42e-24	1.05089	0.849	1.253	TRUE	411.2	23.6164	education	YES	6
415.2	Chronic pulmonary heart disease	8	circulatory system	red	539	42157	4.33e-08	0.901714	0.579	1.224	TRUE	415.2	7.3634	education	YES	6
416	Cardiomegaly	8	circulatory system	red	1216	42157	0.0240783	0.259592	0.034	0.485	TRUE	416	1.61837	education	NO	6
479	Other upper respiratory disease	9	respiratory	coral4	3696	22230	0.00728154	0.198413	0.054	0.343	TRUE	479	2.13778	education	NO	6
483	Acute bronchitis and bronchiolitis	9	respiratory	coral4	2769	35021	3.28e-25	0.824252	0.669	0.98	TRUE	483	24.4847	education	YES	6
495.2	Asthma with exacerbation	9	respiratory	coral4	1925	31354	3.51e-21	0.87411	0.693	1.055	TRUE	495.2	20.4545	education	YES	6
512.1	Wheezing	9	respiratory	coral4	871	20879	8.02e-26	1.46478	1.192	1.738	TRUE	512.1	25.0961	education	YES	6
585.4	Chronic kidney disease, Stage I or II	11	genitourinary	black	904	35752	3.12e-11	0.8768	0.618	1.136	TRUE	585.4	10.5064	education	YES	6
590	Pyelonephritis	11	genitourinary	black	567	31388	4.1e-18	1.3881	1.075	1.702	TRUE	590	17.3876	education	YES	6
593.2	Microscopic hematuria	11	genitourinary	black	719	31388	0.883547	-0.0224122	-0.322	0.277	TRUE	593.2	0.0537706	education	NO	6
627	Menopausal and postmenopausal disorders	11	genitourinary	black	7331	12074	1.2e-09	-0.399864	-0.529	-0.271	TRUE	627	8.91938	education	YES	6
627.2	Symptomatic menopause	11	genitourinary	black	3417	12074	6.61e-07	-0.434314	-0.606	-0.263	TRUE	627.2	6.17953	education	YES	6
796	Elevated prostate specific antigen [PSA]	11	genitourinary	black	2262	8896	5.62e-05	-0.440482	-0.655	-0.226	TRUE	796	4.25028	education	NO	6
172	Skin cancer	2	neoplasms	darkcyan	4069	37468	3.52e-09	-0.658264	-0.877	-0.44	TRUE	172	8.45325	median_income_subset	YES	6
172.2	Other non-epithelial cancer of skin	2	neoplasms	darkcyan	3276	37468	3.98e-08	-0.66995	-0.909	-0.431	TRUE	172.2	7.40035	median_income_subset	YES	6
172.21	Basal cell carcinoma	2	neoplasms	darkcyan	2171	37468	1.06e-10	-0.911891	-1.189	-0.635	TRUE	172.21	9.97353	median_income_subset	YES	6
411.2	Myocardial infarction	8	circulatory system	red	1513	37728	0.000166	0.715208	0.343	1.087	TRUE	411.2	3.78024	median_income_subset	NO	6
415.2	Chronic pulmonary heart disease	8	circulatory system	red	539	42885	2.64e-05	1.35685	0.724	1.99	TRUE	415.2	4.57793	median_income_subset	NO	6
416	Cardiomegaly	8	circulatory system	red	1216	42885	4.77e-06	0.964764	0.551	1.378	TRUE	416	5.32185	median_income_subset	YES	6
479	Other upper respiratory disease	9	respiratory	coral4	3696	22958	1.09e-22	1.42031	1.136	1.704	TRUE	479	21.9619	median_income_subset	YES	6
483	Acute bronchitis and bronchiolitis	9	respiratory	coral4	2769	35749	4.22e-38	2.1361	1.812	2.461	TRUE	483	37.3746	median_income_subset	YES	6
495.2	Asthma with exacerbation	9	respiratory	coral4	1925	32082	0.000659	0.601321	0.255	0.947	TRUE	495.2	3.18081	median_income_subset	NO	6
512.1	Wheezing	9	respiratory	coral4	871	21607	1.09e-07	1.4918	0.941	2.042	TRUE	512.1	6.96079	median_income_subset	YES	6
585.4	Chronic kidney disease, Stage I or II	11	genitourinary	black	904	36480	2.55e-07	1.29527	0.803	1.788	TRUE	585.4	6.59372	median_income_subset	YES	6
590	Pyelonephritis	11	genitourinary	black	567	32116	0.00496646	0.900731	0.272	1.529	TRUE	590	2.30395	median_income_subset	NO	6
593.2	Microscopic hematuria	11	genitourinary	black	719	32116	3.83e-06	1.3403	0.772	1.909	TRUE	593.2	5.41631	median_income_subset	YES	6
627	Menopausal and postmenopausal disorders	11	genitourinary	black	7331	12448	0.0484682	0.247159	0.002	0.493	TRUE	627	1.31454	median_income_subset	NO	6
627.2	Symptomatic menopause	11	genitourinary	black	3417	12448	0.453729	-0.118947	-0.43	0.192	TRUE	627.2	0.343203	median_income_subset	NO	6
796	Elevated prostate specific antigen [PSA]	11	genitourinary	black	2262	9232	3.38e-08	1.01036	0.652	1.369	TRUE	796	7.47145	median_income_subset	YES	6
172	Skin cancer	2	neoplasms	darkcyan	4069	37468	0.0575879	0.268156	-0.009	0.545	TRUE	172	1.23967	high_school_education_subset	NO	6
172.2	Other non-epithelial cancer of skin	2	neoplasms	darkcyan	3276	37468	0.00603299	0.424195	0.121	0.727	TRUE	172.2	2.21947	high_school_education_subset	NO	6
172.21	Basal cell carcinoma	2	neoplasms	darkcyan	2171	37468	0.00684513	0.493079	0.136	0.85	TRUE	172.21	2.16462	high_school_education_subset	NO	6
411.2	Myocardial infarction	8	circulatory system	red	1513	37728	0.818593	-0.0503237	-0.48	0.38	TRUE	411.2	0.0869319	high_school_education_subset	NO	6
415.2	Chronic pulmonary heart disease	8	circulatory system	red	539	42885	0.00128862	1.05724	0.413	1.701	TRUE	415.2	2.88987	high_school_education_subset	NO	6
416	Cardiomegaly	8	circulatory system	red	1216	42885	4.76e-06	1.01591	0.581	1.451	TRUE	416	5.3223	high_school_education_subset	YES	6
479	Other upper respiratory disease	9	respiratory	coral4	3696	22958	0.975481	0.00475445	-0.298	0.308	TRUE	479	0.0107814	high_school_education_subset	NO	6
483	Acute bronchitis and bronchiolitis	9	respiratory	coral4	2769	35749	2.04e-06	-0.831711	-1.175	-0.488	TRUE	483	5.69057	high_school_education_subset	YES	6
495.2	Asthma with exacerbation	9	respiratory	coral4	1925	32082	0.17421	-0.270327	-0.66	0.12	TRUE	495.2	0.758927	high_school_education_subset	NO	6
512.1	Wheezing	9	respiratory	coral4	871	21607	0.0363597	-0.660543	-1.279	-0.042	TRUE	512.1	1.43938	high_school_education_subset	NO	6
585.4	Chronic kidney disease, Stage I or II	11	genitourinary	black	904	36480	0.0527763	0.523169	-0.006	1.053	TRUE	585.4	1.27756	high_school_education_subset	NO	6
590	Pyelonephritis	11	genitourinary	black	567	32116	0.00317689	0.976118	0.328	1.625	TRUE	590	2.498	high_school_education_subset	NO	6
593.2	Microscopic hematuria	11	genitourinary	black	719	32116	1.73e-09	1.69919	1.146	2.252	TRUE	593.2	8.76123	high_school_education_subset	YES	6
627	Menopausal and postmenopausal disorders	11	genitourinary	black	7331	12448	1.73e-20	-1.33401	-1.616	-1.052	TRUE	627	19.7611	high_school_education_subset	YES	6
627.2	Symptomatic menopause	11	genitourinary	black	3417	12448	0.000703	-0.635521	-1.003	-0.268	TRUE	627.2	3.15316	high_school_education_subset	NO	6
796	Elevated prostate specific antigen [PSA]	11	genitourinary	black	2262	9232	2.43e-06	0.963956	0.563	1.365	TRUE	796	5.61369	high_school_education_subset	YES	6
172	Skin cancer	2	neoplasms	darkcyan	4069	37468	0.158136	-0.196522	-0.469	0.076	TRUE	172	0.800969	assited_income_subset	NO	6
172.2	Other non-epithelial cancer of skin	2	neoplasms	darkcyan	3276	37468	0.309559	-0.155472	-0.455	0.144	TRUE	172.2	0.509256	assited_income_subset	NO	6
172.21	Basal cell carcinoma	2	neoplasms	darkcyan	2171	37468	0.282775	-0.196074	-0.554	0.162	TRUE	172.21	0.548559	assited_income_subset	NO	6
411.2	Myocardial infarction	8	circulatory system	red	1513	37728	0.0052972	0.575012	0.171	0.979	TRUE	411.2	2.27595	assited_income_subset	NO	6
415.2	Chronic pulmonary heart disease	8	circulatory system	red	539	42885	1.75e-06	1.41625	0.836	1.997	TRUE	415.2	5.75624	assited_income_subset	YES	6
416	Cardiomegaly	8	circulatory system	red	1216	42885	6.63e-12	1.41213	1.009	1.815	TRUE	416	11.1785	assited_income_subset	YES	6
479	Other upper respiratory disease	9	respiratory	coral4	3696	22958	2.25e-06	0.686953	0.402	0.972	TRUE	479	5.6481	assited_income_subset	YES	6
483	Acute bronchitis and bronchiolitis	9	respiratory	coral4	2769	35749	0.120985	0.241015	-0.064	0.546	TRUE	483	0.917267	assited_income_subset	NO	6
495.2	Asthma with exacerbation	9	respiratory	coral4	1925	32082	0.309641	0.184832	-0.172	0.541	TRUE	495.2	0.509142	assited_income_subset	NO	6
512.1	Wheezing	9	respiratory	coral4	871	21607	0.657106	0.130223	-0.445	0.705	TRUE	512.1	0.182364	assited_income_subset	NO	6
585.4	Chronic kidney disease, Stage I or II	11	genitourinary	black	904	36480	2.79e-06	1.15695	0.673	1.641	TRUE	585.4	5.55498	assited_income_subset	YES	6
590	Pyelonephritis	11	genitourinary	black	567	32116	0.000863	1.03604	0.427	1.646	TRUE	590	3.064	assited_income_subset	NO	6
593.2	Microscopic hematuria	11	genitourinary	black	719	32116	1.78e-09	1.61509	1.089	2.141	TRUE	593.2	8.74942	assited_income_subset	YES	6
627	Menopausal and postmenopausal disorders	11	genitourinary	black	7331	12448	0.000492	-0.470824	-0.736	-0.206	TRUE	627	3.30782	assited_income_subset	NO	6
627.2	Symptomatic menopause	11	genitourinary	black	3417	12448	2.25e-06	-0.844416	-1.194	-0.494	TRUE	627.2	5.64772	assited_income_subset	YES	6
796	Elevated prostate specific antigen [PSA]	11	genitourinary	black	2262	9232	2.95e-08	1.13293	0.732	1.533	TRUE	796	7.52988	assited_income_subset	YES	6
172	Skin cancer	2	neoplasms	darkcyan	4069	37468	0.277821	0.148056	-0.119	0.415	TRUE	172	0.556234	no_health_insurance_subset	NO	6
172.2	Other non-epithelial cancer of skin	2	neoplasms	darkcyan	3276	37468	0.0291533	0.325882	0.033	0.619	TRUE	172.2	1.53531	no_health_insurance_subset	NO	6
172.21	Basal cell carcinoma	2	neoplasms	darkcyan	2171	37468	0.71097	0.0666954	-0.286	0.419	TRUE	172.21	0.148149	no_health_insurance_subset	NO	6
411.2	Myocardial infarction	8	circulatory system	red	1513	37728	0.448487	0.159233	-0.253	0.571	TRUE	411.2	0.34825	no_health_insurance_subset	NO	6
415.2	Chronic pulmonary heart disease	8	circulatory system	red	539	42885	0.000536	1.1051	0.479	1.731	TRUE	415.2	3.27049	no_health_insurance_subset	NO	6
416	Cardiomegaly	8	circulatory system	red	1216	42885	3.94e-08	1.17451	0.755	1.594	TRUE	416	7.40453	no_health_insurance_subset	YES	6
479	Other upper respiratory disease	9	respiratory	coral4	3696	22958	0.00190995	0.448822	0.165	0.732	TRUE	479	2.71898	no_health_insurance_subset	NO	6
483	Acute bronchitis and bronchiolitis	9	respiratory	coral4	2769	35749	0.12254	-0.256774	-0.583	0.069	TRUE	483	0.911722	no_health_insurance_subset	NO	6
495.2	Asthma with exacerbation	9	respiratory	coral4	1925	32082	2.58e-05	-0.852738	-1.25	-0.456	TRUE	495.2	4.5884	no_health_insurance_subset	NO	6
512.1	Wheezing	9	respiratory	coral4	871	21607	0.0759796	-0.534071	-1.124	0.056	TRUE	512.1	1.1193	no_health_insurance_subset	NO	6
585.4	Chronic kidney disease, Stage I or II	11	genitourinary	black	904	36480	0.00106699	0.840301	0.337	1.344	TRUE	585.4	2.97184	no_health_insurance_subset	NO	6
590	Pyelonephritis	11	genitourinary	black	567	32116	0.329336	0.319651	-0.323	0.962	TRUE	590	0.482361	no_health_insurance_subset	NO	6
593.2	Microscopic hematuria	11	genitourinary	black	719	32116	2.63e-08	1.50673	0.976	2.037	TRUE	593.2	7.58072	no_health_insurance_subset	YES	6
627	Menopausal and postmenopausal disorders	11	genitourinary	black	7331	12448	5.19e-19	-1.20975	-1.476	-0.944	TRUE	627	18.2845	no_health_insurance_subset	YES	6
627.2	Symptomatic menopause	11	genitourinary	black	3417	12448	7.83e-05	-0.700263	-1.048	-0.353	TRUE	627.2	4.10602	no_health_insurance_subset	NO	6
796	Elevated prostate specific antigen [PSA]	11	genitourinary	black	2262	9232	5e-08	1.05754	0.677	1.438	TRUE	796	7.30117	no_health_insurance_subset	YES	6
172	Skin cancer	2	neoplasms	darkcyan	4069	37468	0.488877	-0.109862	-0.421	0.201	TRUE	172	0.3108	area_poverty_subset	NO	6
172.2	Other non-epithelial cancer of skin	2	neoplasms	darkcyan	3276	37468	0.652792	0.0780967	-0.262	0.418	TRUE	172.2	0.185225	area_poverty_subset	NO	6
172.21	Basal cell carcinoma	2	neoplasms	darkcyan	2171	37468	0.866868	-0.0347611	-0.441	0.372	TRUE	172.21	0.0620468	area_poverty_subset	NO	6
411.2	Myocardial infarction	8	circulatory system	red	1513	37728	0.0634813	0.453098	-0.025	0.932	TRUE	411.2	1.19735	area_poverty_subset	NO	6
415.2	Chronic pulmonary heart disease	8	circulatory system	red	539	42885	0.000297	1.34294	0.615	2.071	TRUE	415.2	3.52671	area_poverty_subset	NO	6
416	Cardiomegaly	8	circulatory system	red	1216	42885	3.35e-10	1.58752	1.092	2.083	TRUE	416	9.47447	area_poverty_subset	YES	6
479	Other upper respiratory disease	9	respiratory	coral4	3696	22958	3.58e-12	1.19863	0.861	1.537	TRUE	479	11.446	area_poverty_subset	YES	6
483	Acute bronchitis and bronchiolitis	9	respiratory	coral4	2769	35749	0.000331	0.646367	0.293	0.999	TRUE	483	3.48079	area_poverty_subset	NO	6
495.2	Asthma with exacerbation	9	respiratory	coral4	1925	32082	0.863911	0.0369965	-0.386	0.46	TRUE	495.2	0.0635308	area_poverty_subset	NO	6
512.1	Wheezing	9	respiratory	coral4	871	21607	0.385878	0.292215	-0.368	0.953	TRUE	512.1	0.41355	area_poverty_subset	NO	6
585.4	Chronic kidney disease, Stage I or II	11	genitourinary	black	904	36480	0.000148	1.13523	0.549	1.722	TRUE	585.4	3.83035	area_poverty_subset	NO	6
590	Pyelonephritis	11	genitourinary	black	567	32116	0.00122326	1.21751	0.48	1.956	TRUE	590	2.91248	area_poverty_subset	NO	6
593.2	Microscopic hematuria	11	genitourinary	black	719	32116	2.39e-09	1.96441	1.319	2.609	TRUE	593.2	8.6216	area_poverty_subset	YES	6
627	Menopausal and postmenopausal disorders	11	genitourinary	black	7331	12448	0.0683428	-0.285308	-0.592	0.021	TRUE	627	1.16531	area_poverty_subset	NO	6
627.2	Symptomatic menopause	11	genitourinary	black	3417	12448	0.0530159	-0.390978	-0.787	0.005	TRUE	627.2	1.27559	area_poverty_subset	NO	6
796	Elevated prostate specific antigen [PSA]	11	genitourinary	black	2262	9232	1.4e-06	1.16179	0.69	1.634	TRUE	796	5.85389	area_poverty_subset	YES	6
172	Skin cancer	2	neoplasms	darkcyan	4069	37468	0.15808	-0.240846	-0.575	0.094	TRUE	172	0.801123	vacant_housing_subset	NO	6
172.2	Other non-epithelial cancer of skin	2	neoplasms	darkcyan	3276	37468	0.213917	-0.23323	-0.601	0.135	TRUE	172.2	0.669755	vacant_housing_subset	NO	6
172.21	Basal cell carcinoma	2	neoplasms	darkcyan	2171	37468	0.00283873	-0.709053	-1.175	-0.243	TRUE	172.21	2.54688	vacant_housing_subset	NO	6
411.2	Myocardial infarction	8	circulatory system	red	1513	37728	1.91e-06	1.14883	0.676	1.622	TRUE	411.2	5.7184	vacant_housing_subset	YES	6
415.2	Chronic pulmonary heart disease	8	circulatory system	red	539	42885	0.000388	1.28413	0.575	1.993	TRUE	415.2	3.41162	vacant_housing_subset	NO	6
416	Cardiomegaly	8	circulatory system	red	1216	42885	0.00139607	0.836192	0.323	1.349	TRUE	416	2.85509	vacant_housing_subset	NO	6
479	Other upper respiratory disease	9	respiratory	coral4	3696	22958	0.0249936	0.418268	0.053	0.784	TRUE	479	1.60217	vacant_housing_subset	NO	6
483	Acute bronchitis and bronchiolitis	9	respiratory	coral4	2769	35749	0.149055	0.289119	-0.104	0.682	TRUE	483	0.826654	vacant_housing_subset	NO	6
495.2	Asthma with exacerbation	9	respiratory	coral4	1925	32082	0.934808	-0.0202962	-0.507	0.466	TRUE	495.2	0.0292778	vacant_housing_subset	NO	6
512.1	Wheezing	9	respiratory	coral4	871	21607	0.732706	0.125408	-0.594	0.845	TRUE	512.1	0.13507	vacant_housing_subset	NO	6
585.4	Chronic kidney disease, Stage I or II	11	genitourinary	black	904	36480	0.000232	1.0857	0.508	1.664	TRUE	585.4	3.63524	vacant_housing_subset	NO	6
590	Pyelonephritis	11	genitourinary	black	567	32116	0.0458117	0.801793	0.015	1.589	TRUE	590	1.33902	vacant_housing_subset	NO	6
593.2	Microscopic hematuria	11	genitourinary	black	719	32116	0.661646	0.164137	-0.571	0.899	TRUE	593.2	0.179374	vacant_housing_subset	NO	6
627	Menopausal and postmenopausal disorders	11	genitourinary	black	7331	12448	0.0358774	-0.359849	-0.696	-0.024	TRUE	627	1.44518	vacant_housing_subset	NO	6
627.2	Symptomatic menopause	11	genitourinary	black	3417	12448	5.12e-06	-1.04434	-1.493	-0.595	TRUE	627.2	5.2911	vacant_housing_subset	YES	6
796	Elevated prostate specific antigen [PSA]	11	genitourinary	black	2262	9232	0.0351913	0.540547	0.038	1.044	TRUE	796	1.45356	vacant_housing_subset	NO	6
172	Skin cancer	2	neoplasms	darkcyan	4069	37468	0.0850611	-0.241481	-0.516	0.033	TRUE	172	1.07027	deprivation_index_subset	NO	6
172.2	Other non-epithelial cancer of skin	2	neoplasms	darkcyan	3276	37468	0.388979	-0.132775	-0.435	0.169	TRUE	172.2	0.410074	deprivation_index_subset	NO	6
172.21	Basal cell carcinoma	2	neoplasms	darkcyan	2171	37468	0.0641581	-0.33993	-0.7	0.02	TRUE	172.21	1.19275	deprivation_index_subset	NO	6
411.2	Myocardial infarction	8	circulatory system	red	1513	37728	0.00812702	0.569037	0.148	0.99	TRUE	411.2	2.09007	deprivation_index_subset	NO	6
415.2	Chronic pulmonary heart disease	8	circulatory system	red	539	42885	2.23e-06	1.57193	0.921	2.223	TRUE	415.2	5.65118	deprivation_index_subset	YES	6
416	Cardiomegaly	8	circulatory system	red	1216	42885	6.15e-11	1.48833	1.042	1.934	TRUE	416	10.2112	deprivation_index_subset	YES	6
479	Other upper respiratory disease	9	respiratory	coral4	3696	22958	5.09e-10	0.950647	0.651	1.25	TRUE	479	9.29369	deprivation_index_subset	YES	6
483	Acute bronchitis and bronchiolitis	9	respiratory	coral4	2769	35749	0.000197	0.605432	0.287	0.924	TRUE	483	3.7045	deprivation_index_subset	NO	6
495.2	Asthma with exacerbation	9	respiratory	coral4	1925	32082	0.952809	0.0114416	-0.367	0.39	TRUE	495.2	0.0209942	deprivation_index_subset	NO	6
512.1	Wheezing	9	respiratory	coral4	871	21607	0.27735	0.323179	-0.26	0.906	TRUE	512.1	0.556972	deprivation_index_subset	NO	6
585.4	Chronic kidney disease, Stage I or II	11	genitourinary	black	904	36480	1.92e-06	1.27241	0.749	1.796	TRUE	585.4	5.71676	deprivation_index_subset	YES	6
590	Pyelonephritis	11	genitourinary	black	567	32116	0.00137443	1.08828	0.422	1.755	TRUE	590	2.86188	deprivation_index_subset	NO	6
593.2	Microscopic hematuria	11	genitourinary	black	719	32116	1.54e-10	1.91648	1.33	2.503	TRUE	593.2	9.81127	deprivation_index_subset	YES	6
627	Menopausal and postmenopausal disorders	11	genitourinary	black	7331	12448	2.87e-06	-0.658239	-0.934	-0.383	TRUE	627	5.54255	deprivation_index_subset	YES	6
627.2	Symptomatic menopause	11	genitourinary	black	3417	12448	0.000275	-0.661764	-1.018	-0.305	TRUE	627.2	3.56024	deprivation_index_subset	NO	6
796	Elevated prostate specific antigen [PSA]	11	genitourinary	black	2262	9232	6.84e-10	1.2977	0.885	1.71	TRUE	796	9.16508	deprivation_index_subset	YES	6
172.1	Melanomas of skin, dx or hx	2	neoplasms	darkcyan	906	37468	2.43e-09	-1.41937	-1.886	-0.953	TRUE	172.1	8.61502	SDOH	YES	5
172.11	Melanomas of skin	2	neoplasms	darkcyan	906	37468	2.43e-09	-1.41937	-1.886	-0.953	TRUE	172.11	8.61502	SDOH	YES	5
174	Breast cancer	2	neoplasms	darkcyan	2406	39054	1.99e-06	-0.675563	-0.954	-0.397	TRUE	174	5.70049	SDOH	YES	5
174.1	Breast cancer [female]	2	neoplasms	darkcyan	2293	20948	3.51e-06	-0.67612	-0.962	-0.39	TRUE	174.1	5.45466	SDOH	YES	5
195.1	Malignant neoplasm, other	2	neoplasms	darkcyan	706	40611	0.0121051	-0.620298	-1.105	-0.136	TRUE	195.1	1.91703	SDOH	NO	5
245	Thyroiditis	3	endocrine/metabolic	brown	1262	33730	0.00117419	-0.595672	-0.955	-0.236	TRUE	245	2.93026	SDOH	NO	5
260	Protein-calorie malnutrition	3	endocrine/metabolic	brown	573	30089	6.35e-10	1.46861	1.003	1.934	TRUE	260	9.19699	SDOH	YES	5
272.13	Mixed hyperlipidemia	3	endocrine/metabolic	brown	7829	19731	1.6e-32	1.11251	0.929	1.296	TRUE	272.13	31.7954	SDOH	YES	5
275	Disorders of mineral metabolism	3	endocrine/metabolic	brown	2747	42593	5.86e-08	0.641279	0.41	0.873	TRUE	275	7.23225	SDOH	YES	5
279	Disorders involving the immune mechanism	3	endocrine/metabolic	brown	1837	44110	0.56273	-0.0879274	-0.386	0.21	TRUE	279	0.2497	SDOH	NO	5
411.3	Angina pectoris	8	circulatory system	red	1775	37728	1.06e-14	1.17456	0.877	1.472	TRUE	411.3	13.974	SDOH	YES	5
414	Other forms of chronic heart disease	8	circulatory system	red	955	37728	0.000257	0.7396	0.343	1.136	TRUE	414	3.58949	SDOH	NO	5
427	Cardiac dysrhythmias	8	circulatory system	red	12944	26813	3.31e-05	0.300357	0.159	0.442	TRUE	427	4.4804	SDOH	NO	5
427.5	Arrhythmia (cardiac) NOS	8	circulatory system	red	2360	26813	0.11811	-0.249705	-0.563	0.063	TRUE	427.5	0.927714	SDOH	NO	5
427.7	Tachycardia NOS	8	circulatory system	red	2182	26813	1.7e-11	0.913911	0.648	1.18	TRUE	427.7	10.7698	SDOH	YES	5
433.2	Occlusion of cerebral arteries	8	circulatory system	red	1063	41932	4.1e-09	1.0577	0.705	1.41	TRUE	433.2	8.38758	SDOH	YES	5
433.8	Late effects of cerebrovascular disease	8	circulatory system	red	375	41932	8.89e-10	1.70934	1.163	2.256	TRUE	433.8	9.05088	SDOH	YES	5
443	Peripheral vascular disease	8	circulatory system	red	2291	38510	1.12e-09	0.793727	0.538	1.049	TRUE	443	8.95176	SDOH	YES	5
443.7	Peripheral angiopathy in diseases classified elsewhere	8	circulatory system	red	330	38510	3.68e-10	1.9474	1.338	2.556	TRUE	443.7	9.4345	SDOH	YES	5
452	Other venous embolism and thrombosis	8	circulatory system	red	1686	30247	1.21e-05	0.675516	0.373	0.978	TRUE	452	4.91649	SDOH	NO	5
452.2	Deep vein thrombosis [DVT]	8	circulatory system	red	1319	30247	0.000187	0.645582	0.307	0.984	TRUE	452.2	3.72879	SDOH	NO	5
458	Hypotension	8	circulatory system	red	1734	41904	2.34e-08	0.830884	0.539	1.122	TRUE	458	7.63061	SDOH	YES	5
472	Chronic pharyngitis and nasopharyngitis	9	respiratory	coral4	2582	22958	0.0502493	-0.283679	-0.568	0	TRUE	472	1.29887	SDOH	NO	5
476	Allergic rhinitis	9	respiratory	coral4	9393	22958	0.00572977	-0.227746	-0.389	-0.066	TRUE	476	2.24186	SDOH	NO	5
512.2	Painful respiration	9	respiratory	coral4	1176	21607	3.18e-18	1.68032	1.302	2.059	TRUE	512.2	17.4976	SDOH	YES	5
513.3	Hypoventilation	9	respiratory	coral4	450	45109	4.06e-07	1.29699	0.795	1.799	TRUE	513.3	6.39132	SDOH	YES	5
585.34	Chronic Kidney Disease, Stage IV	11	genitourinary	black	425	36480	2.15e-11	1.85527	1.312	2.398	TRUE	585.34	10.6677	SDOH	YES	5
592	Cystitis and urethritis	11	genitourinary	black	2144	32116	2.5e-07	0.71043	0.44	0.98	TRUE	592	6.60127	SDOH	YES	5
592.1	Cystitis	11	genitourinary	black	1999	32116	3.84e-08	0.776753	0.5	1.054	TRUE	592.1	7.41531	SDOH	YES	5
598	Abnormal findings on examination of urine	11	genitourinary	black	878	45259	0.0242181	0.452293	0.059	0.846	TRUE	598	1.61586	SDOH	NO	5
598.4	Other cells and casts in urine	11	genitourinary	black	215	45259	0.044201	-0.964611	-1.904	-0.025	TRUE	598.4	1.35457	SDOH	NO	5
599.2	Retention of urine	11	genitourinary	black	1690	27827	0.025976	0.371488	0.044	0.698	TRUE	599.2	1.58543	SDOH	NO	5
613.7	Other signs and symptoms in breast	11	genitourinary	black	1019	39729	0.0447378	-0.401522	-0.794	-0.009	TRUE	613.7	1.34933	SDOH	NO	5
172.1	Melanomas of skin, dx or hx	2	neoplasms	darkcyan	906	37468	2.6e-12	-2.15013	-2.752	-1.548	TRUE	172.1	11.5851	SCC	YES	5
172.11	Melanomas of skin	2	neoplasms	darkcyan	906	37468	2.6e-12	-2.15013	-2.752	-1.548	TRUE	172.11	11.5851	SCC	YES	5
174	Breast cancer	2	neoplasms	darkcyan	2406	39054	2.57e-08	-1.04836	-1.417	-0.679	TRUE	174	7.59075	SCC	YES	5
174.1	Breast cancer [female]	2	neoplasms	darkcyan	2293	20948	9.52e-09	-1.11379	-1.494	-0.733	TRUE	174.1	8.02116	SCC	YES	5
195.1	Malignant neoplasm, other	2	neoplasms	darkcyan	706	40611	0.492459	-0.219118	-0.845	0.407	TRUE	195.1	0.30763	SCC	NO	5
245	Thyroiditis	3	endocrine/metabolic	brown	1262	33730	0.791963	0.0608668	-0.391	0.513	TRUE	245	0.101295	SCC	NO	5
260	Protein-calorie malnutrition	3	endocrine/metabolic	brown	573	30089	3.15e-08	1.85284	1.196	2.509	TRUE	260	7.50153	SCC	YES	5
272.13	Mixed hyperlipidemia	3	endocrine/metabolic	brown	7829	19731	2.58e-05	0.529915	0.283	0.777	TRUE	272.13	4.58898	SCC	NO	5
275	Disorders of mineral metabolism	3	endocrine/metabolic	brown	2747	42593	0.000599	0.554477	0.238	0.871	TRUE	275	3.22226	SCC	NO	5
279	Disorders involving the immune mechanism	3	endocrine/metabolic	brown	1837	44110	0.244975	-0.230176	-0.618	0.158	TRUE	279	0.610878	SCC	NO	5
411.3	Angina pectoris	8	circulatory system	red	1775	37728	0.000224	0.785822	0.368	1.203	TRUE	411.3	3.65019	SCC	NO	5
414	Other forms of chronic heart disease	8	circulatory system	red	955	37728	0.0758395	0.498438	-0.052	1.049	TRUE	414	1.1201	SCC	NO	5
427	Cardiac dysrhythmias	8	circulatory system	red	12944	26813	6.25e-09	0.553196	0.367	0.74	TRUE	427	8.20396	SCC	YES	5
427.5	Arrhythmia (cardiac) NOS	8	circulatory system	red	2360	26813	0.33775	-0.197435	-0.601	0.206	TRUE	427.5	0.471405	SCC	NO	5
427.7	Tachycardia NOS	8	circulatory system	red	2182	26813	1.02e-08	1.04442	0.687	1.402	TRUE	427.7	7.9921	SCC	YES	5
433.2	Occlusion of cerebral arteries	8	circulatory system	red	1063	41932	4.18e-06	1.15793	0.665	1.651	TRUE	433.2	5.37908	SCC	YES	5
433.8	Late effects of cerebrovascular disease	8	circulatory system	red	375	41932	6.16e-06	1.82583	1.034	2.617	TRUE	433.8	5.21009	SCC	YES	5
443	Peripheral vascular disease	8	circulatory system	red	2291	38510	1.44e-06	0.857016	0.508	1.206	TRUE	443	5.84145	SCC	YES	5
443.7	Peripheral angiopathy in diseases classified elsewhere	8	circulatory system	red	330	38510	1.82e-05	1.92089	1.042	2.799	TRUE	443.7	4.73943	SCC	NO	5
452	Other venous embolism and thrombosis	8	circulatory system	red	1686	30247	0.00827995	0.556972	0.144	0.97	TRUE	452	2.08197	SCC	NO	5
452.2	Deep vein thrombosis [DVT]	8	circulatory system	red	1319	30247	0.0228071	0.538771	0.075	1.003	TRUE	452.2	1.64193	SCC	NO	5
458	Hypotension	8	circulatory system	red	1734	41904	6.13e-12	1.36539	0.976	1.755	TRUE	458	11.2125	SCC	YES	5
472	Chronic pharyngitis and nasopharyngitis	9	respiratory	coral4	2582	22958	0.000152	0.69657	0.336	1.057	TRUE	472	3.81864	SCC	NO	5
476	Allergic rhinitis	9	respiratory	coral4	9393	22958	1.35e-08	0.601403	0.394	0.809	TRUE	476	7.86841	SCC	YES	5
512.2	Painful respiration	9	respiratory	coral4	1176	21607	2.61e-06	1.27854	0.745	1.812	TRUE	512.2	5.58367	SCC	YES	5
513.3	Hypoventilation	9	respiratory	coral4	450	45109	5.22e-08	1.92541	1.232	2.619	TRUE	513.3	7.28198	SCC	YES	5
585.34	Chronic Kidney Disease, Stage IV	11	genitourinary	black	425	36480	0.580532	0.230447	-0.587	1.048	TRUE	585.34	0.236174	SCC	NO	5
592	Cystitis and urethritis	11	genitourinary	black	2144	32116	0.00118414	0.602715	0.238	0.967	TRUE	592	2.9266	SCC	NO	5
592.1	Cystitis	11	genitourinary	black	1999	32116	0.00217189	0.589057	0.212	0.966	TRUE	592.1	2.66316	SCC	NO	5
598	Abnormal findings on examination of urine	11	genitourinary	black	878	45259	0.212953	0.339939	-0.195	0.875	TRUE	598	0.671716	SCC	NO	5
598.4	Other cells and casts in urine	11	genitourinary	black	215	45259	0.366395	-0.533511	-1.691	0.624	TRUE	598.4	0.436051	SCC	NO	5
599.2	Retention of urine	11	genitourinary	black	1690	27827	1.15e-05	0.960143	0.531	1.389	TRUE	599.2	4.9403	SCC	NO	5
613.7	Other signs and symptoms in breast	11	genitourinary	black	1019	39729	0.632381	0.121713	-0.377	0.62	TRUE	613.7	0.199021	SCC	NO	5
172.1	Melanomas of skin, dx or hx	2	neoplasms	darkcyan	906	37468	9.58e-06	-1.11046	-1.602	-0.619	TRUE	172.1	5.01876	NBD	NO	5
172.11	Melanomas of skin	2	neoplasms	darkcyan	906	37468	9.58e-06	-1.11046	-1.602	-0.619	TRUE	172.11	5.01876	NBD	NO	5
174	Breast cancer	2	neoplasms	darkcyan	2406	39054	2.53e-05	-0.649121	-0.951	-0.347	TRUE	174	4.59773	NBD	NO	5
174.1	Breast cancer [female]	2	neoplasms	darkcyan	2293	20948	2.96e-05	-0.662362	-0.973	-0.352	TRUE	174.1	4.52938	NBD	NO	5
195.1	Malignant neoplasm, other	2	neoplasms	darkcyan	706	40611	0.0177825	-0.638752	-1.167	-0.111	TRUE	195.1	1.75001	NBD	NO	5
245	Thyroiditis	3	endocrine/metabolic	brown	1262	33730	5.5e-09	-1.17254	-1.567	-0.778	TRUE	245	8.25936	NBD	YES	5
260	Protein-calorie malnutrition	3	endocrine/metabolic	brown	573	30089	0.00012455	1.01984	0.499	1.541	TRUE	260	3.90467	NBD	NO	5
272.13	Mixed hyperlipidemia	3	endocrine/metabolic	brown	7829	19731	0.033787	0.21998	0.017	0.423	TRUE	272.13	1.47125	NBD	NO	5
275	Disorders of mineral metabolism	3	endocrine/metabolic	brown	2747	42593	0.000265	0.469248	0.217	0.721	TRUE	275	3.5764	NBD	NO	5
279	Disorders involving the immune mechanism	3	endocrine/metabolic	brown	1837	44110	0.000149	-0.633095	-0.96	-0.306	TRUE	279	3.82779	NBD	NO	5
411.3	Angina pectoris	8	circulatory system	red	1775	37728	0.0328521	0.365347	0.03	0.701	TRUE	411.3	1.48344	NBD	NO	5
414	Other forms of chronic heart disease	8	circulatory system	red	955	37728	0.23588	0.265095	-0.173	0.703	TRUE	414	0.627308	NBD	NO	5
427	Cardiac dysrhythmias	8	circulatory system	red	12944	26813	0.709502	0.0288691	-0.123	0.181	TRUE	427	0.149046	NBD	NO	5
427.5	Arrhythmia (cardiac) NOS	8	circulatory system	red	2360	26813	0.000181	-0.65313	-0.995	-0.311	TRUE	427.5	3.74225	NBD	NO	5
427.7	Tachycardia NOS	8	circulatory system	red	2182	26813	0.0146576	0.362975	0.071	0.654	TRUE	427.7	1.83394	NBD	NO	5
433.2	Occlusion of cerebral arteries	8	circulatory system	red	1063	41932	5.61e-05	0.80011	0.411	1.189	TRUE	433.2	4.25111	NBD	NO	5
433.8	Late effects of cerebrovascular disease	8	circulatory system	red	375	41932	5.3e-05	1.274	0.656	1.892	TRUE	433.8	4.2758	NBD	NO	5
443	Peripheral vascular disease	8	circulatory system	red	2291	38510	6.48e-05	0.568082	0.289	0.847	TRUE	443	4.18827	NBD	NO	5
443.7	Peripheral angiopathy in diseases classified elsewhere	8	circulatory system	red	330	38510	3.02e-07	1.73203	1.069	2.395	TRUE	443.7	6.51976	NBD	YES	5
452	Other venous embolism and thrombosis	8	circulatory system	red	1686	30247	0.201559	0.221082	-0.118	0.56	TRUE	452	0.695599	NBD	NO	5
452.2	Deep vein thrombosis [DVT]	8	circulatory system	red	1319	30247	0.272946	0.2129	-0.168	0.594	TRUE	452.2	0.563923	NBD	NO	5
458	Hypotension	8	circulatory system	red	1734	41904	0.000345	0.578865	0.262	0.896	TRUE	458	3.46176	NBD	NO	5
472	Chronic pharyngitis and nasopharyngitis	9	respiratory	coral4	2582	22958	0.00823359	0.38831	0.1	0.676	TRUE	472	2.08441	NBD	NO	5
476	Allergic rhinitis	9	respiratory	coral4	9393	22958	0.0750556	0.152184	-0.015	0.32	TRUE	476	1.12462	NBD	NO	5
512.2	Painful respiration	9	respiratory	coral4	1176	21607	0.0120361	0.559823	0.123	0.997	TRUE	512.2	1.91951	NBD	NO	5
513.3	Hypoventilation	9	respiratory	coral4	450	45109	0.000189	1.04616	0.497	1.595	TRUE	513.3	3.72433	NBD	NO	5
585.34	Chronic Kidney Disease, Stage IV	11	genitourinary	black	425	36480	0.000541	1.0765	0.467	1.686	TRUE	585.34	3.26683	NBD	NO	5
592	Cystitis and urethritis	11	genitourinary	black	2144	32116	0.0253683	0.335078	0.041	0.629	TRUE	592	1.59571	NBD	NO	5
592.1	Cystitis	11	genitourinary	black	1999	32116	0.0136193	0.380123	0.078	0.682	TRUE	592.1	1.86585	NBD	NO	5
598	Abnormal findings on examination of urine	11	genitourinary	black	878	45259	1.13e-06	1.00737	0.602	1.413	TRUE	598	5.94857	NBD	YES	5
598.4	Other cells and casts in urine	11	genitourinary	black	215	45259	0.000263	1.5003	0.694	2.306	TRUE	598.4	3.57935	NBD	NO	5
599.2	Retention of urine	11	genitourinary	black	1690	27827	0.000119	0.673903	0.331	1.017	TRUE	599.2	3.92302	NBD	NO	5
613.7	Other signs and symptoms in breast	11	genitourinary	black	1019	39729	0.00855155	0.524697	0.134	0.916	TRUE	613.7	2.06796	NBD	NO	5
172.1	Melanomas of skin, dx or hx	2	neoplasms	darkcyan	906	37468	1.24e-29	-3.56429	-4.182	-2.946	TRUE	172.1	28.9075	ES	YES	5
172.11	Melanomas of skin	2	neoplasms	darkcyan	906	37468	1.24e-29	-3.56429	-4.182	-2.946	TRUE	172.11	28.9075	ES	YES	5
174	Breast cancer	2	neoplasms	darkcyan	2406	39054	3.69e-20	-1.44802	-1.757	-1.139	TRUE	174	19.4329	ES	YES	5
174.1	Breast cancer [female]	2	neoplasms	darkcyan	2293	20948	1e-18	-1.42894	-1.746	-1.112	TRUE	174.1	17.9995	ES	YES	5
195.1	Malignant neoplasm, other	2	neoplasms	darkcyan	706	40611	0.000943	-0.896432	-1.428	-0.365	TRUE	195.1	3.02563	ES	NO	5
245	Thyroiditis	3	endocrine/metabolic	brown	1262	33730	0.000179	-0.672716	-1.025	-0.321	TRUE	245	3.74823	ES	NO	5
260	Protein-calorie malnutrition	3	endocrine/metabolic	brown	573	30089	3.37e-29	2.46036	2.03	2.89	TRUE	260	28.472	ES	YES	5
272.13	Mixed hyperlipidemia	3	endocrine/metabolic	brown	7829	19731	2.25e-17	0.811271	0.624	0.999	TRUE	272.13	16.6485	ES	YES	5
275	Disorders of mineral metabolism	3	endocrine/metabolic	brown	2747	42593	1.54e-09	0.715533	0.483	0.948	TRUE	275	8.81121	ES	YES	5
279	Disorders involving the immune mechanism	3	endocrine/metabolic	brown	1837	44110	3.3e-07	-0.8055	-1.115	-0.496	TRUE	279	6.48185	ES	YES	5
411.3	Angina pectoris	8	circulatory system	red	1775	37728	9.24e-20	1.42465	1.118	1.732	TRUE	411.3	19.0343	ES	YES	5
414	Other forms of chronic heart disease	8	circulatory system	red	955	37728	2.34e-08	1.15562	0.75	1.561	TRUE	414	7.63022	ES	YES	5
427	Cardiac dysrhythmias	8	circulatory system	red	12944	26813	1.02e-06	0.355398	0.213	0.498	TRUE	427	5.9917	ES	YES	5
427.5	Arrhythmia (cardiac) NOS	8	circulatory system	red	2360	26813	0.000423	-0.603075	-0.938	-0.268	TRUE	427.5	3.37329	ES	NO	5
427.7	Tachycardia NOS	8	circulatory system	red	2182	26813	1.18e-10	0.836089	0.582	1.09	TRUE	427.7	9.92632	ES	YES	5
433.2	Occlusion of cerebral arteries	8	circulatory system	red	1063	41932	2.1e-25	1.82486	1.481	2.168	TRUE	433.2	24.6776	ES	YES	5
433.8	Late effects of cerebrovascular disease	8	circulatory system	red	375	41932	8.94e-21	2.50535	1.98	3.031	TRUE	433.8	20.0489	ES	YES	5
443	Peripheral vascular disease	8	circulatory system	red	2291	38510	1.79e-15	1.04359	0.786	1.301	TRUE	443	14.7466	ES	YES	5
443.7	Peripheral angiopathy in diseases classified elsewhere	8	circulatory system	red	330	38510	3.86e-16	2.53288	1.923	3.143	TRUE	443.7	15.4137	ES	YES	5
452	Other venous embolism and thrombosis	8	circulatory system	red	1686	30247	3.36e-11	1.01556	0.715	1.316	TRUE	452	10.474	ES	YES	5
452.2	Deep vein thrombosis [DVT]	8	circulatory system	red	1319	30247	2.81e-10	1.07941	0.744	1.415	TRUE	452.2	9.55147	ES	YES	5
458	Hypotension	8	circulatory system	red	1734	41904	1.41e-26	1.50472	1.228	1.781	TRUE	458	25.8514	ES	YES	5
472	Chronic pharyngitis and nasopharyngitis	9	respiratory	coral4	2582	22958	0.476843	-0.1016	-0.382	0.178	TRUE	472	0.321625	ES	NO	5
476	Allergic rhinitis	9	respiratory	coral4	9393	22958	0.0433669	0.161442	0.005	0.318	TRUE	476	1.36284	ES	NO	5
512.2	Painful respiration	9	respiratory	coral4	1176	21607	8.07e-15	1.50852	1.128	1.889	TRUE	512.2	14.0929	ES	YES	5
513.3	Hypoventilation	9	respiratory	coral4	450	45109	2.38e-10	1.56365	1.08	2.047	TRUE	513.3	9.62428	ES	YES	5
585.34	Chronic Kidney Disease, Stage IV	11	genitourinary	black	425	36480	5.15e-12	1.95413	1.399	2.509	TRUE	585.34	11.2884	ES	YES	5
592	Cystitis and urethritis	11	genitourinary	black	2144	32116	1.88e-08	0.74664	0.486	1.007	TRUE	592	7.72544	ES	YES	5
592.1	Cystitis	11	genitourinary	black	1999	32116	9.28e-09	0.784156	0.517	1.052	TRUE	592.1	8.03255	ES	YES	5
598	Abnormal findings on examination of urine	11	genitourinary	black	878	45259	0.177235	0.276056	-0.125	0.677	TRUE	598	0.751451	ES	NO	5
598.4	Other cells and casts in urine	11	genitourinary	black	215	45259	0.0130745	-1.34763	-2.412	-0.283	TRUE	598.4	1.88357	ES	NO	5
599.2	Retention of urine	11	genitourinary	black	1690	27827	2.63e-10	1.06448	0.734	1.395	TRUE	599.2	9.58068	ES	YES	5
613.7	Other signs and symptoms in breast	11	genitourinary	black	1019	39729	0.00391997	-0.568503	-0.955	-0.182	TRUE	613.7	2.40672	ES	NO	5
172.1	Melanomas of skin, dx or hx	2	neoplasms	darkcyan	906	37468	4.12e-09	-1.80286	-2.404	-1.202	TRUE	172.1	8.38477	HCAU	YES	5
172.11	Melanomas of skin	2	neoplasms	darkcyan	906	37468	4.12e-09	-1.80286	-2.404	-1.202	TRUE	172.11	8.38477	HCAU	YES	5
174	Breast cancer	2	neoplasms	darkcyan	2406	39054	4.91e-08	-0.969486	-1.318	-0.621	TRUE	174	7.30884	HCAU	YES	5
174.1	Breast cancer [female]	2	neoplasms	darkcyan	2293	20948	1.07e-08	-1.04715	-1.406	-0.688	TRUE	174.1	7.97169	HCAU	YES	5
195.1	Malignant neoplasm, other	2	neoplasms	darkcyan	706	40611	0.815687	-0.0716607	-0.674	0.531	TRUE	195.1	0.0884767	HCAU	NO	5
245	Thyroiditis	3	endocrine/metabolic	brown	1262	33730	0.00999643	0.543253	0.13	0.957	TRUE	245	2.00016	HCAU	NO	5
260	Protein-calorie malnutrition	3	endocrine/metabolic	brown	573	30089	1.09e-16	2.57362	1.965	3.182	TRUE	260	15.9627	HCAU	YES	5
272.13	Mixed hyperlipidemia	3	endocrine/metabolic	brown	7829	19731	7.83e-05	0.470613	0.237	0.704	TRUE	272.13	4.10631	HCAU	NO	5
275	Disorders of mineral metabolism	3	endocrine/metabolic	brown	2747	42593	8.08e-06	0.688251	0.386	0.991	TRUE	275	5.09237	HCAU	NO	5
279	Disorders involving the immune mechanism	3	endocrine/metabolic	brown	1837	44110	0.0268246	0.413126	0.047	0.779	TRUE	279	1.57147	HCAU	NO	5
411.3	Angina pectoris	8	circulatory system	red	1775	37728	5.95e-13	1.47716	1.075	1.879	TRUE	411.3	12.2253	HCAU	YES	5
414	Other forms of chronic heart disease	8	circulatory system	red	955	37728	8.84e-05	1.05404	0.527	1.581	TRUE	414	4.05348	HCAU	NO	5
427	Cardiac dysrhythmias	8	circulatory system	red	12944	26813	5.4e-21	0.84691	0.67	1.023	TRUE	427	20.2677	HCAU	YES	5
427.5	Arrhythmia (cardiac) NOS	8	circulatory system	red	2360	26813	0.0618847	0.371892	-0.018	0.762	TRUE	427.5	1.20842	HCAU	NO	5
427.7	Tachycardia NOS	8	circulatory system	red	2182	26813	9.44e-19	1.49945	1.167	1.832	TRUE	427.7	18.0251	HCAU	YES	5
433.2	Occlusion of cerebral arteries	8	circulatory system	red	1063	41932	5.31e-10	1.49339	1.022	1.965	TRUE	433.2	9.27518	HCAU	YES	5
433.8	Late effects of cerebrovascular disease	8	circulatory system	red	375	41932	3.6e-05	1.61893	0.851	2.387	TRUE	433.8	4.44372	HCAU	NO	5
443	Peripheral vascular disease	8	circulatory system	red	2291	38510	2.21e-21	1.59389	1.265	1.923	TRUE	443	20.6549	HCAU	YES	5
443.7	Peripheral angiopathy in diseases classified elsewhere	8	circulatory system	red	330	38510	1.44e-13	3.10897	2.285	3.933	TRUE	443.7	12.8408	HCAU	YES	5
452	Other venous embolism and thrombosis	8	circulatory system	red	1686	30247	4.23e-06	0.923929	0.53	1.318	TRUE	452	5.37387	HCAU	YES	5
452.2	Deep vein thrombosis [DVT]	8	circulatory system	red	1319	30247	6.13e-06	1.0146	0.575	1.454	TRUE	452.2	5.21248	HCAU	YES	5
458	Hypotension	8	circulatory system	red	1734	41904	9.5e-25	1.94221	1.572	2.313	TRUE	458	24.0224	HCAU	YES	5
472	Chronic pharyngitis and nasopharyngitis	9	respiratory	coral4	2582	22958	1.57e-08	0.972636	0.635	1.31	TRUE	472	7.80356	HCAU	YES	5
476	Allergic rhinitis	9	respiratory	coral4	9393	22958	1.62e-08	0.561816	0.367	0.757	TRUE	476	7.79139	HCAU	YES	5
512.2	Painful respiration	9	respiratory	coral4	1176	21607	9.16e-16	2.04443	1.546	2.543	TRUE	512.2	15.038	HCAU	YES	5
513.3	Hypoventilation	9	respiratory	coral4	450	45109	1.38e-08	1.90356	1.246	2.561	TRUE	513.3	7.86006	HCAU	YES	5
585.34	Chronic Kidney Disease, Stage IV	11	genitourinary	black	425	36480	0.109	0.651581	-0.145	1.448	TRUE	585.34	0.962573	HCAU	NO	5
592	Cystitis and urethritis	11	genitourinary	black	2144	32116	1.56e-09	1.02751	0.694	1.361	TRUE	592	8.80617	HCAU	YES	5
592.1	Cystitis	11	genitourinary	black	1999	32116	5.46e-09	1.02301	0.679	1.367	TRUE	592.1	8.26255	HCAU	YES	5
598	Abnormal findings on examination of urine	11	genitourinary	black	878	45259	0.0124434	0.645283	0.139	1.151	TRUE	598	1.90506	HCAU	NO	5
598.4	Other cells and casts in urine	11	genitourinary	black	215	45259	0.735089	0.193685	-0.928	1.316	TRUE	598.4	0.13366	HCAU	NO	5
599.2	Retention of urine	11	genitourinary	black	1690	27827	2.85e-10	1.3361	0.921	1.751	TRUE	599.2	9.54496	HCAU	YES	5
613.7	Other signs and symptoms in breast	11	genitourinary	black	1019	39729	0.460359	-0.176369	-0.645	0.292	TRUE	613.7	0.336904	HCAU	NO	5
172.1	Melanomas of skin, dx or hx	2	neoplasms	darkcyan	906	36740	6.42e-18	-1.26147	-1.548	-0.975	TRUE	172.1	17.1928	education	YES	5
172.11	Melanomas of skin	2	neoplasms	darkcyan	906	36740	6.42e-18	-1.26147	-1.548	-0.975	TRUE	172.11	17.1928	education	YES	5
174	Breast cancer	2	neoplasms	darkcyan	2406	38326	1.05e-09	-0.543343	-0.718	-0.369	TRUE	174	8.97715	education	YES	5
174.1	Breast cancer [female]	2	neoplasms	darkcyan	2293	20574	2.17e-09	-0.546379	-0.725	-0.367	TRUE	174.1	8.66309	education	YES	5
195.1	Malignant neoplasm, other	2	neoplasms	darkcyan	706	39883	2.98e-05	-0.649557	-0.954	-0.345	TRUE	195.1	4.52622	education	NO	5
245	Thyroiditis	3	endocrine/metabolic	brown	1262	33002	0.000134	-0.44381	-0.672	-0.216	TRUE	245	3.87337	education	NO	5
260	Protein-calorie malnutrition	3	endocrine/metabolic	brown	573	29361	2.93e-12	1.13566	0.817	1.455	TRUE	260	11.5333	education	YES	5
272.13	Mixed hyperlipidemia	3	endocrine/metabolic	brown	7829	19003	1.64e-46	0.87111	0.752	0.99	TRUE	272.13	45.7855	education	YES	5
275	Disorders of mineral metabolism	3	endocrine/metabolic	brown	2747	41865	2.57e-12	0.53578	0.386	0.686	TRUE	275	11.5896	education	YES	5
279	Disorders involving the immune mechanism	3	endocrine/metabolic	brown	1837	43382	0.000276	-0.361414	-0.556	-0.167	TRUE	279	3.55891	education	NO	5
411.3	Angina pectoris	8	circulatory system	red	1775	37000	2.7e-16	0.810373	0.616	1.004	TRUE	411.3	15.5686	education	YES	5
414	Other forms of chronic heart disease	8	circulatory system	red	955	37000	8.94e-05	0.508683	0.254	0.763	TRUE	414	4.0486	education	NO	5
427	Cardiac dysrhythmias	8	circulatory system	red	12944	26085	0.00876365	0.12112	0.031	0.212	TRUE	427	2.05731	education	NO	5
427.5	Arrhythmia (cardiac) NOS	8	circulatory system	red	2360	26085	8.04e-06	-0.448486	-0.645	-0.252	TRUE	427.5	5.09489	education	NO	5
427.7	Tachycardia NOS	8	circulatory system	red	2182	26085	1.37e-12	0.648068	0.469	0.827	TRUE	427.7	11.8639	education	YES	5
433.2	Occlusion of cerebral arteries	8	circulatory system	red	1063	41204	5.22e-10	0.735279	0.503	0.967	TRUE	433.2	9.28247	education	YES	5
433.8	Late effects of cerebrovascular disease	8	circulatory system	red	375	41204	7.25e-13	1.36984	0.996	1.744	TRUE	433.8	12.1397	education	YES	5
443	Peripheral vascular disease	8	circulatory system	red	2291	37782	6.55e-14	0.634235	0.468	0.8	TRUE	443	13.1835	education	YES	5
443.7	Peripheral angiopathy in diseases classified elsewhere	8	circulatory system	red	330	37782	6.54e-17	1.75543	1.344	2.167	TRUE	443.7	16.1842	education	YES	5
452	Other venous embolism and thrombosis	8	circulatory system	red	1686	29519	1.88e-05	0.432949	0.235	0.631	TRUE	452	4.72583	education	NO	5
452.2	Deep vein thrombosis [DVT]	8	circulatory system	red	1319	29519	0.000179	0.423182	0.202	0.645	TRUE	452.2	3.74648	education	NO	5
458	Hypotension	8	circulatory system	red	1734	41176	2.3e-09	0.58627	0.394	0.779	TRUE	458	8.63772	education	YES	5
472	Chronic pharyngitis and nasopharyngitis	9	respiratory	coral4	2582	22230	0.00287589	-0.271426	-0.45	-0.093	TRUE	472	2.54123	education	NO	5
476	Allergic rhinitis	9	respiratory	coral4	9393	22230	0.0293634	-0.113835	-0.216	-0.011	TRUE	476	1.53219	education	NO	5
512.2	Painful respiration	9	respiratory	coral4	1176	20879	3.73e-14	0.992942	0.736	1.25	TRUE	512.2	13.4286	education	YES	5
513.3	Hypoventilation	9	respiratory	coral4	450	44381	2.58e-08	0.974966	0.632	1.318	TRUE	513.3	7.58846	education	YES	5
585.34	Chronic Kidney Disease, Stage IV	11	genitourinary	black	425	35752	1.58e-11	1.2719	0.902	1.642	TRUE	585.34	10.8014	education	YES	5
592	Cystitis and urethritis	11	genitourinary	black	2144	31388	3.64e-09	0.531881	0.355	0.709	TRUE	592	8.43948	education	YES	5
592.1	Cystitis	11	genitourinary	black	1999	31388	3.66e-11	0.613454	0.432	0.795	TRUE	592.1	10.436	education	YES	5
598	Abnormal findings on examination of urine	11	genitourinary	black	878	44531	0.147881	0.190781	-0.068	0.449	TRUE	598	0.830089	education	NO	5
598.4	Other cells and casts in urine	11	genitourinary	black	215	44531	3.75e-05	-1.25717	-1.855	-0.659	TRUE	598.4	4.42637	education	NO	5
599.2	Retention of urine	11	genitourinary	black	1690	27099	0.049377	0.20655	0.001	0.413	TRUE	599.2	1.30648	education	NO	5
613.7	Other signs and symptoms in breast	11	genitourinary	black	1019	39001	2.51e-06	-0.615104	-0.871	-0.359	TRUE	613.7	5.60115	education	YES	5
172.1	Melanomas of skin, dx or hx	2	neoplasms	darkcyan	906	37468	2.52e-05	-0.877044	-1.285	-0.469	TRUE	172.1	4.59798	median_income_subset	NO	5
172.11	Melanomas of skin	2	neoplasms	darkcyan	906	37468	2.52e-05	-0.877044	-1.285	-0.469	TRUE	172.11	4.59798	median_income_subset	NO	5
174	Breast cancer	2	neoplasms	darkcyan	2406	39054	0.0115771	-0.384401	-0.683	-0.086	TRUE	174	1.9364	median_income_subset	NO	5
174.1	Breast cancer [female]	2	neoplasms	darkcyan	2293	20948	0.0532944	-0.304355	-0.613	0.004	TRUE	174.1	1.27332	median_income_subset	NO	5
195.1	Malignant neoplasm, other	2	neoplasms	darkcyan	706	40611	0.165524	0.367171	-0.152	0.886	TRUE	195.1	0.781139	median_income_subset	NO	5
245	Thyroiditis	3	endocrine/metabolic	brown	1262	33730	0.0492984	-0.384838	-0.768	-0.001	TRUE	245	1.30717	median_income_subset	NO	5
260	Protein-calorie malnutrition	3	endocrine/metabolic	brown	573	30089	0.00023	1.16464	0.545	1.784	TRUE	260	3.63745	median_income_subset	NO	5
272.13	Mixed hyperlipidemia	3	endocrine/metabolic	brown	7829	19731	1.24e-45	1.64211	1.415	1.869	TRUE	272.13	44.9074	median_income_subset	YES	5
275	Disorders of mineral metabolism	3	endocrine/metabolic	brown	2747	42593	3.47e-12	1.01631	0.73	1.303	TRUE	275	11.4601	median_income_subset	YES	5
279	Disorders involving the immune mechanism	3	endocrine/metabolic	brown	1837	44110	5.94e-22	-1.44037	-1.734	-1.147	TRUE	279	21.2262	median_income_subset	YES	5
411.3	Angina pectoris	8	circulatory system	red	1775	37728	0.662295	0.0741087	-0.258	0.407	TRUE	411.3	0.178948	median_income_subset	NO	5
414	Other forms of chronic heart disease	8	circulatory system	red	955	37728	1.18e-11	1.76039	1.252	2.269	TRUE	414	10.9279	median_income_subset	YES	5
427	Cardiac dysrhythmias	8	circulatory system	red	12944	26813	0.600138	0.0434914	-0.119	0.206	TRUE	427	0.221749	median_income_subset	NO	5
427.5	Arrhythmia (cardiac) NOS	8	circulatory system	red	2360	26813	3.53e-27	-1.58928	-1.878	-1.301	TRUE	427.5	26.4521	median_income_subset	YES	5
427.7	Tachycardia NOS	8	circulatory system	red	2182	26813	0.720114	0.0612544	-0.274	0.396	TRUE	427.7	0.142599	median_income_subset	NO	5
433.2	Occlusion of cerebral arteries	8	circulatory system	red	1063	41932	0.0148459	0.526428	0.103	0.95	TRUE	433.2	1.82839	median_income_subset	NO	5
433.8	Late effects of cerebrovascular disease	8	circulatory system	red	375	41932	0.00313744	1.11048	0.374	1.847	TRUE	433.8	2.50342	median_income_subset	NO	5
443	Peripheral vascular disease	8	circulatory system	red	2291	38510	3.42e-05	0.64696	0.341	0.953	TRUE	443	4.46578	median_income_subset	NO	5
443.7	Peripheral angiopathy in diseases classified elsewhere	8	circulatory system	red	330	38510	0.0140874	0.966269	0.195	1.738	TRUE	443.7	1.85117	median_income_subset	NO	5
452	Other venous embolism and thrombosis	8	circulatory system	red	1686	30247	4.09e-05	0.752953	0.393	1.113	TRUE	452	4.38838	median_income_subset	NO	5
452.2	Deep vein thrombosis [DVT]	8	circulatory system	red	1319	30247	2.28e-05	0.875958	0.471	1.281	TRUE	452.2	4.64139	median_income_subset	NO	5
458	Hypotension	8	circulatory system	red	1734	41904	0.255998	0.196511	-0.143	0.536	TRUE	458	0.591763	median_income_subset	NO	5
472	Chronic pharyngitis and nasopharyngitis	9	respiratory	coral4	2582	22958	1.2e-08	0.920214	0.604	1.237	TRUE	472	7.9195	median_income_subset	YES	5
476	Allergic rhinitis	9	respiratory	coral4	9393	22958	2.86e-52	1.52779	1.331	1.725	TRUE	476	51.5433	median_income_subset	YES	5
512.2	Painful respiration	9	respiratory	coral4	1176	21607	7.89e-05	0.970347	0.489	1.452	TRUE	512.2	4.103	median_income_subset	NO	5
513.3	Hypoventilation	9	respiratory	coral4	450	45109	8.7e-06	1.66368	0.93	2.397	TRUE	513.3	5.06055	median_income_subset	NO	5
585.34	Chronic Kidney Disease, Stage IV	11	genitourinary	black	425	36480	9.68e-05	1.42741	0.71	2.145	TRUE	585.34	4.01431	median_income_subset	NO	5
592	Cystitis and urethritis	11	genitourinary	black	2144	32116	1.4e-07	0.917098	0.576	1.258	TRUE	592	6.85419	median_income_subset	YES	5
592.1	Cystitis	11	genitourinary	black	1999	32116	3.21e-06	0.83291	0.482	1.183	TRUE	592.1	5.49299	median_income_subset	YES	5
598	Abnormal findings on examination of urine	11	genitourinary	black	878	45259	0.102897	0.386177	-0.078	0.85	TRUE	598	0.987598	median_income_subset	NO	5
598.4	Other cells and casts in urine	11	genitourinary	black	215	45259	0.000265	1.94192	0.898	2.985	TRUE	598.4	3.57679	median_income_subset	NO	5
599.2	Retention of urine	11	genitourinary	black	1690	27827	1.22e-07	0.985061	0.62	1.35	TRUE	599.2	6.9132	median_income_subset	YES	5
613.7	Other signs and symptoms in breast	11	genitourinary	black	1019	39729	0.0237512	0.53573	0.071	1	TRUE	613.7	1.62431	median_income_subset	NO	5
172.1	Melanomas of skin, dx or hx	2	neoplasms	darkcyan	906	37468	0.286783	-0.303275	-0.861	0.255	TRUE	172.1	0.542446	high_school_education_subset	NO	5
172.11	Melanomas of skin	2	neoplasms	darkcyan	906	37468	0.286783	-0.303275	-0.861	0.255	TRUE	172.11	0.542446	high_school_education_subset	NO	5
174	Breast cancer	2	neoplasms	darkcyan	2406	39054	0.674005	-0.0775067	-0.439	0.284	TRUE	174	0.171337	high_school_education_subset	NO	5
174.1	Breast cancer [female]	2	neoplasms	darkcyan	2293	20948	0.915042	-0.0201372	-0.39	0.35	TRUE	174.1	0.0385592	high_school_education_subset	NO	5
195.1	Malignant neoplasm, other	2	neoplasms	darkcyan	706	40611	1.75e-09	1.73762	1.172	2.303	TRUE	195.1	8.75791	high_school_education_subset	YES	5
245	Thyroiditis	3	endocrine/metabolic	brown	1262	33730	1.63e-06	-1.20614	-1.699	-0.713	TRUE	245	5.78756	high_school_education_subset	YES	5
260	Protein-calorie malnutrition	3	endocrine/metabolic	brown	573	30089	0.0227181	0.768845	0.107	1.43	TRUE	260	1.64363	high_school_education_subset	NO	5
272.13	Mixed hyperlipidemia	3	endocrine/metabolic	brown	7829	19731	0.0595104	-0.246092	-0.502	0.01	TRUE	272.13	1.22541	high_school_education_subset	NO	5
275	Disorders of mineral metabolism	3	endocrine/metabolic	brown	2747	42593	0.0514479	0.309014	-0.002	0.62	TRUE	275	1.28863	high_school_education_subset	NO	5
279	Disorders involving the immune mechanism	3	endocrine/metabolic	brown	1837	44110	0.00536917	-0.568499	-0.969	-0.168	TRUE	279	2.27009	high_school_education_subset	NO	5
411.3	Angina pectoris	8	circulatory system	red	1775	37728	0.666752	-0.0901751	-0.501	0.32	TRUE	411.3	0.176036	high_school_education_subset	NO	5
414	Other forms of chronic heart disease	8	circulatory system	red	955	37728	0.000102	0.987752	0.49	1.486	TRUE	414	3.99132	high_school_education_subset	NO	5
427	Cardiac dysrhythmias	8	circulatory system	red	12944	26813	6.71e-09	-0.562595	-0.753	-0.372	TRUE	427	8.17313	high_school_education_subset	YES	5
427.5	Arrhythmia (cardiac) NOS	8	circulatory system	red	2360	26813	3.58e-14	-1.59526	-2.008	-1.183	TRUE	427.5	13.446	high_school_education_subset	YES	5
427.7	Tachycardia NOS	8	circulatory system	red	2182	26813	0.0275632	-0.433591	-0.819	-0.048	TRUE	427.7	1.55967	high_school_education_subset	NO	5
433.2	Occlusion of cerebral arteries	8	circulatory system	red	1063	41932	0.301446	0.256039	-0.23	0.742	TRUE	433.2	0.52079	high_school_education_subset	NO	5
433.8	Late effects of cerebrovascular disease	8	circulatory system	red	375	41932	0.0848221	0.682521	-0.094	1.459	TRUE	433.8	1.07149	high_school_education_subset	NO	5
443	Peripheral vascular disease	8	circulatory system	red	2291	38510	0.465553	-0.131846	-0.486	0.222	TRUE	443	0.332031	high_school_education_subset	NO	5
443.7	Peripheral angiopathy in diseases classified elsewhere	8	circulatory system	red	330	38510	0.10916	0.698235	-0.156	1.553	TRUE	443.7	0.961936	high_school_education_subset	NO	5
452	Other venous embolism and thrombosis	8	circulatory system	red	1686	30247	0.0048338	0.58565	0.178	0.993	TRUE	452	2.31571	high_school_education_subset	NO	5
452.2	Deep vein thrombosis [DVT]	8	circulatory system	red	1319	30247	0.00557835	0.640237	0.187	1.093	TRUE	452.2	2.25349	high_school_education_subset	NO	5
458	Hypotension	8	circulatory system	red	1734	41904	0.781872	-0.057041	-0.461	0.347	TRUE	458	0.106864	high_school_education_subset	NO	5
472	Chronic pharyngitis and nasopharyngitis	9	respiratory	coral4	2582	22958	0.134523	0.270053	-0.084	0.624	TRUE	472	0.871202	high_school_education_subset	NO	5
476	Allergic rhinitis	9	respiratory	coral4	9393	22958	0.0382019	-0.222012	-0.432	-0.012	TRUE	476	1.41791	high_school_education_subset	NO	5
512.2	Painful respiration	9	respiratory	coral4	1176	21607	0.217022	-0.352803	-0.913	0.207	TRUE	512.2	0.663496	high_school_education_subset	NO	5
513.3	Hypoventilation	9	respiratory	coral4	450	45109	0.223742	0.446841	-0.273	1.167	TRUE	513.3	0.650252	high_school_education_subset	NO	5
585.34	Chronic Kidney Disease, Stage IV	11	genitourinary	black	425	36480	8.17e-05	1.45047	0.729	2.172	TRUE	585.34	4.08753	high_school_education_subset	NO	5
592	Cystitis and urethritis	11	genitourinary	black	2144	32116	0.563352	-0.11084	-0.487	0.265	TRUE	592	0.24922	high_school_education_subset	NO	5
592.1	Cystitis	11	genitourinary	black	1999	32116	0.189456	-0.262287	-0.654	0.129	TRUE	592.1	0.722491	high_school_education_subset	NO	5
598	Abnormal findings on examination of urine	11	genitourinary	black	878	45259	6.83e-13	1.75288	1.275	2.231	TRUE	598	12.1657	high_school_education_subset	YES	5
598.4	Other cells and casts in urine	11	genitourinary	black	215	45259	2.31e-35	4.76748	4.015	5.52	TRUE	598.4	34.6363	high_school_education_subset	YES	5
599.2	Retention of urine	11	genitourinary	black	1690	27827	0.106053	0.339835	-0.072	0.752	TRUE	599.2	0.974477	high_school_education_subset	NO	5
613.7	Other signs and symptoms in breast	11	genitourinary	black	1019	39729	1.01e-14	1.84893	1.381	2.317	TRUE	613.7	13.9949	high_school_education_subset	YES	5
172.1	Melanomas of skin, dx or hx	2	neoplasms	darkcyan	906	37468	0.0961592	-0.459309	-1	0.082	TRUE	172.1	1.01701	assited_income_subset	NO	5
172.11	Melanomas of skin	2	neoplasms	darkcyan	906	37468	0.0961592	-0.459309	-1	0.082	TRUE	172.11	1.01701	assited_income_subset	NO	5
174	Breast cancer	2	neoplasms	darkcyan	2406	39054	0.423193	-0.14012	-0.483	0.203	TRUE	174	0.373461	assited_income_subset	NO	5
174.1	Breast cancer [female]	2	neoplasms	darkcyan	2293	20948	0.665827	-0.0770292	-0.427	0.273	TRUE	174.1	0.176639	assited_income_subset	NO	5
195.1	Malignant neoplasm, other	2	neoplasms	darkcyan	706	40611	5.69e-07	1.3533	0.823	1.884	TRUE	195.1	6.24511	assited_income_subset	YES	5
245	Thyroiditis	3	endocrine/metabolic	brown	1262	33730	0.000154	-0.898045	-1.363	-0.433	TRUE	245	3.8125	assited_income_subset	NO	5
260	Protein-calorie malnutrition	3	endocrine/metabolic	brown	573	30089	0.0784361	0.559471	-0.064	1.183	TRUE	260	1.10548	assited_income_subset	NO	5
272.13	Mixed hyperlipidemia	3	endocrine/metabolic	brown	7829	19731	0.183883	0.164941	-0.078	0.408	TRUE	272.13	0.735459	assited_income_subset	NO	5
275	Disorders of mineral metabolism	3	endocrine/metabolic	brown	2747	42593	0.000101	0.57965	0.287	0.872	TRUE	275	3.99375	assited_income_subset	NO	5
279	Disorders involving the immune mechanism	3	endocrine/metabolic	brown	1837	44110	0.000643	-0.681116	-1.072	-0.29	TRUE	279	3.19182	assited_income_subset	NO	5
411.3	Angina pectoris	8	circulatory system	red	1775	37728	0.0118346	0.494531	0.109	0.88	TRUE	411.3	1.92685	assited_income_subset	NO	5
414	Other forms of chronic heart disease	8	circulatory system	red	955	37728	4.3e-10	1.44049	0.988	1.893	TRUE	414	9.36614	assited_income_subset	YES	5
427	Cardiac dysrhythmias	8	circulatory system	red	12944	26813	0.590112	-0.050117	-0.232	0.132	TRUE	427	0.229065	assited_income_subset	NO	5
427.5	Arrhythmia (cardiac) NOS	8	circulatory system	red	2360	26813	0.00101518	-0.660114	-1.054	-0.266	TRUE	427.5	2.99346	assited_income_subset	NO	5
427.7	Tachycardia NOS	8	circulatory system	red	2182	26813	0.795051	-0.0489758	-0.419	0.321	TRUE	427.7	0.0996052	assited_income_subset	NO	5
433.2	Occlusion of cerebral arteries	8	circulatory system	red	1063	41932	0.00194446	0.714126	0.262	1.166	TRUE	433.2	2.7112	assited_income_subset	NO	5
433.8	Late effects of cerebrovascular disease	8	circulatory system	red	375	41932	0.0197785	0.866822	0.138	1.596	TRUE	433.8	1.70381	assited_income_subset	NO	5
443	Peripheral vascular disease	8	circulatory system	red	2291	38510	0.0185202	0.390511	0.066	0.716	TRUE	443	1.73235	assited_income_subset	NO	5
443.7	Peripheral angiopathy in diseases classified elsewhere	8	circulatory system	red	330	38510	2.45e-05	1.5922	0.853	2.332	TRUE	443.7	4.61073	assited_income_subset	NO	5
452	Other venous embolism and thrombosis	8	circulatory system	red	1686	30247	0.000416	0.69957	0.311	1.088	TRUE	452	3.38103	assited_income_subset	NO	5
452.2	Deep vein thrombosis [DVT]	8	circulatory system	red	1319	30247	0.00103581	0.725295	0.292	1.159	TRUE	452.2	2.98472	assited_income_subset	NO	5
458	Hypotension	8	circulatory system	red	1734	41904	0.881622	0.0294754	-0.358	0.417	TRUE	458	0.0547177	assited_income_subset	NO	5
472	Chronic pharyngitis and nasopharyngitis	9	respiratory	coral4	2582	22958	9.77e-05	0.658832	0.327	0.99	TRUE	472	4.00989	assited_income_subset	NO	5
476	Allergic rhinitis	9	respiratory	coral4	9393	22958	0.00354069	0.29918	0.098	0.5	TRUE	476	2.45091	assited_income_subset	NO	5
512.2	Painful respiration	9	respiratory	coral4	1176	21607	0.065769	0.485496	-0.032	1.003	TRUE	512.2	1.18198	assited_income_subset	NO	5
513.3	Hypoventilation	9	respiratory	coral4	450	45109	0.00332497	0.976887	0.325	1.629	TRUE	513.3	2.47821	assited_income_subset	NO	5
585.34	Chronic Kidney Disease, Stage IV	11	genitourinary	black	425	36480	1.24e-07	1.77688	1.118	2.436	TRUE	585.34	6.9055	assited_income_subset	YES	5
592	Cystitis and urethritis	11	genitourinary	black	2144	32116	0.0106617	0.456518	0.106	0.807	TRUE	592	1.97217	assited_income_subset	NO	5
592.1	Cystitis	11	genitourinary	black	1999	32116	0.150314	0.269073	-0.098	0.636	TRUE	592.1	0.823001	assited_income_subset	NO	5
598	Abnormal findings on examination of urine	11	genitourinary	black	878	45259	1.66e-07	1.2229	0.765	1.681	TRUE	598	6.78066	assited_income_subset	YES	5
598.4	Other cells and casts in urine	11	genitourinary	black	215	45259	5.8e-25	3.72946	3.021	4.438	TRUE	598.4	24.2368	assited_income_subset	YES	5
599.2	Retention of urine	11	genitourinary	black	1690	27827	1.15e-08	1.09384	0.718	1.469	TRUE	599.2	7.94047	assited_income_subset	YES	5
613.7	Other signs and symptoms in breast	11	genitourinary	black	1019	39729	4e-11	1.39031	0.978	1.803	TRUE	613.7	10.3985	assited_income_subset	YES	5
172.1	Melanomas of skin, dx or hx	2	neoplasms	darkcyan	906	37468	0.0225961	-0.633838	-1.179	-0.089	TRUE	172.1	1.64597	no_health_insurance_subset	NO	5
172.11	Melanomas of skin	2	neoplasms	darkcyan	906	37468	0.0225961	-0.633838	-1.179	-0.089	TRUE	172.11	1.64597	no_health_insurance_subset	NO	5
174	Breast cancer	2	neoplasms	darkcyan	2406	39054	0.787651	-0.0480446	-0.398	0.302	TRUE	174	0.103666	no_health_insurance_subset	NO	5
174.1	Breast cancer [female]	2	neoplasms	darkcyan	2293	20948	0.619982	0.0903855	-0.267	0.448	TRUE	174.1	0.207621	no_health_insurance_subset	NO	5
195.1	Malignant neoplasm, other	2	neoplasms	darkcyan	706	40611	1.02e-120	5.55419	5.088	6.02	TRUE	195.1	119.993	no_health_insurance_subset	YES	5
245	Thyroiditis	3	endocrine/metabolic	brown	1262	33730	3.63e-07	-1.25063	-1.732	-0.769	TRUE	245	6.43993	no_health_insurance_subset	YES	5
260	Protein-calorie malnutrition	3	endocrine/metabolic	brown	573	30089	0.00951433	0.843866	0.206	1.482	TRUE	260	2.02162	no_health_insurance_subset	NO	5
272.13	Mixed hyperlipidemia	3	endocrine/metabolic	brown	7829	19731	0.102407	0.197277	-0.039	0.434	TRUE	272.13	0.989669	no_health_insurance_subset	NO	5
275	Disorders of mineral metabolism	3	endocrine/metabolic	brown	2747	42593	1.92e-05	0.648427	0.351	0.946	TRUE	275	4.71763	no_health_insurance_subset	NO	5
279	Disorders involving the immune mechanism	3	endocrine/metabolic	brown	1837	44110	4.75e-22	-2.11605	-2.546	-1.686	TRUE	279	21.3235	no_health_insurance_subset	YES	5
411.3	Angina pectoris	8	circulatory system	red	1775	37728	8.39e-08	-1.15915	-1.583	-0.735	TRUE	411.3	7.07623	no_health_insurance_subset	YES	5
414	Other forms of chronic heart disease	8	circulatory system	red	955	37728	8.66e-19	2.08063	1.62	2.541	TRUE	414	18.0625	no_health_insurance_subset	YES	5
427	Cardiac dysrhythmias	8	circulatory system	red	12944	26813	2.01e-06	-0.437003	-0.617	-0.257	TRUE	427	5.69749	no_health_insurance_subset	YES	5
427.5	Arrhythmia (cardiac) NOS	8	circulatory system	red	2360	26813	2.66e-17	-1.72171	-2.121	-1.323	TRUE	427.5	16.5753	no_health_insurance_subset	YES	5
427.7	Tachycardia NOS	8	circulatory system	red	2182	26813	0.0130154	-0.47563	-0.851	-0.1	TRUE	427.7	1.88554	no_health_insurance_subset	NO	5
433.2	Occlusion of cerebral arteries	8	circulatory system	red	1063	41932	5.22e-05	0.931179	0.48	1.382	TRUE	433.2	4.28242	no_health_insurance_subset	NO	5
433.8	Late effects of cerebrovascular disease	8	circulatory system	red	375	41932	2.74e-06	1.70711	0.994	2.421	TRUE	433.8	5.56151	no_health_insurance_subset	YES	5
443	Peripheral vascular disease	8	circulatory system	red	2291	38510	0.051175	-0.344534	-0.691	0.002	TRUE	443	1.29094	no_health_insurance_subset	NO	5
443.7	Peripheral angiopathy in diseases classified elsewhere	8	circulatory system	red	330	38510	0.606103	0.224245	-0.628	1.077	TRUE	443.7	0.217453	no_health_insurance_subset	NO	5
452	Other venous embolism and thrombosis	8	circulatory system	red	1686	30247	2.5e-08	1.09224	0.708	1.476	TRUE	452	7.60221	no_health_insurance_subset	YES	5
452.2	Deep vein thrombosis [DVT]	8	circulatory system	red	1319	30247	8.24e-08	1.16382	0.738	1.589	TRUE	452.2	7.08419	no_health_insurance_subset	YES	5
458	Hypotension	8	circulatory system	red	1734	41904	0.10632	0.316341	-0.068	0.7	TRUE	458	0.973385	no_health_insurance_subset	NO	5
472	Chronic pharyngitis and nasopharyngitis	9	respiratory	coral4	2582	22958	2.13e-06	0.801023	0.47	1.132	TRUE	472	5.671	no_health_insurance_subset	YES	5
476	Allergic rhinitis	9	respiratory	coral4	9393	22958	0.00290074	0.301533	0.103	0.5	TRUE	476	2.53749	no_health_insurance_subset	NO	5
512.2	Painful respiration	9	respiratory	coral4	1176	21607	0.108885	-0.445497	-0.99	0.099	TRUE	512.2	0.963033	no_health_insurance_subset	NO	5
513.3	Hypoventilation	9	respiratory	coral4	450	45109	0.335645	0.341698	-0.354	1.037	TRUE	513.3	0.47412	no_health_insurance_subset	NO	5
585.34	Chronic Kidney Disease, Stage IV	11	genitourinary	black	425	36480	9.62e-05	1.41265	0.703	2.123	TRUE	585.34	4.01673	no_health_insurance_subset	NO	5
592	Cystitis and urethritis	11	genitourinary	black	2144	32116	0.00377233	-0.545178	-0.914	-0.176	TRUE	592	2.42339	no_health_insurance_subset	NO	5
592.1	Cystitis	11	genitourinary	black	1999	32116	0.000597	-0.672064	-1.056	-0.288	TRUE	592.1	3.22386	no_health_insurance_subset	NO	5
598	Abnormal findings on examination of urine	11	genitourinary	black	878	45259	2.87e-08	1.34928	0.873	1.826	TRUE	598	7.54149	no_health_insurance_subset	YES	5
598.4	Other cells and casts in urine	11	genitourinary	black	215	45259	4.38e-26	4.40499	3.588	5.222	TRUE	598.4	25.3582	no_health_insurance_subset	YES	5
599.2	Retention of urine	11	genitourinary	black	1690	27827	0.900797	0.0253602	-0.373	0.424	TRUE	599.2	0.0453733	no_health_insurance_subset	NO	5
613.7	Other signs and symptoms in breast	11	genitourinary	black	1019	39729	1.33e-08	1.37002	0.897	1.843	TRUE	613.7	7.87557	no_health_insurance_subset	YES	5
172.1	Melanomas of skin, dx or hx	2	neoplasms	darkcyan	906	37468	0.00393322	-0.920763	-1.547	-0.295	TRUE	172.1	2.40525	area_poverty_subset	NO	5
172.11	Melanomas of skin	2	neoplasms	darkcyan	906	37468	0.00393322	-0.920763	-1.547	-0.295	TRUE	172.11	2.40525	area_poverty_subset	NO	5
174	Breast cancer	2	neoplasms	darkcyan	2406	39054	0.0271187	-0.449589	-0.848	-0.051	TRUE	174	1.56673	area_poverty_subset	NO	5
174.1	Breast cancer [female]	2	neoplasms	darkcyan	2293	20948	0.0824824	-0.360982	-0.768	0.046	TRUE	174.1	1.08364	area_poverty_subset	NO	5
195.1	Malignant neoplasm, other	2	neoplasms	darkcyan	706	40611	0.000333	1.21005	0.549	1.871	TRUE	195.1	3.47698	area_poverty_subset	NO	5
245	Thyroiditis	3	endocrine/metabolic	brown	1262	33730	1.68e-08	-1.54425	-2.081	-1.008	TRUE	245	7.77501	area_poverty_subset	YES	5
260	Protein-calorie malnutrition	3	endocrine/metabolic	brown	573	30089	0.0123198	0.932444	0.202	1.663	TRUE	260	1.9094	area_poverty_subset	NO	5
272.13	Mixed hyperlipidemia	3	endocrine/metabolic	brown	7829	19731	0.401362	0.121285	-0.162	0.405	TRUE	272.13	0.396464	area_poverty_subset	NO	5
275	Disorders of mineral metabolism	3	endocrine/metabolic	brown	2747	42593	2.29e-05	0.74622	0.401	1.092	TRUE	275	4.63986	area_poverty_subset	NO	5
279	Disorders involving the immune mechanism	3	endocrine/metabolic	brown	1837	44110	8.19e-14	-1.74941	-2.209	-1.29	TRUE	279	13.0866	area_poverty_subset	YES	5
411.3	Angina pectoris	8	circulatory system	red	1775	37728	0.72603	-0.0823431	-0.543	0.378	TRUE	411.3	0.139045	area_poverty_subset	NO	5
414	Other forms of chronic heart disease	8	circulatory system	red	955	37728	6.13e-05	1.15356	0.589	1.718	TRUE	414	4.21275	area_poverty_subset	NO	5
427	Cardiac dysrhythmias	8	circulatory system	red	12944	26813	0.263844	-0.121661	-0.335	0.092	TRUE	427	0.578653	area_poverty_subset	NO	5
427.5	Arrhythmia (cardiac) NOS	8	circulatory system	red	2360	26813	4.85e-13	-1.69989	-2.161	-1.239	TRUE	427.5	12.314	area_poverty_subset	YES	5
427.7	Tachycardia NOS	8	circulatory system	red	2182	26813	0.634841	0.104306	-0.326	0.535	TRUE	427.7	0.197335	area_poverty_subset	NO	5
433.2	Occlusion of cerebral arteries	8	circulatory system	red	1063	41932	0.034602	0.585886	0.042	1.129	TRUE	433.2	1.4609	area_poverty_subset	NO	5
433.8	Late effects of cerebrovascular disease	8	circulatory system	red	375	41932	0.000613	1.49975	0.642	2.358	TRUE	433.8	3.2123	area_poverty_subset	NO	5
443	Peripheral vascular disease	8	circulatory system	red	2291	38510	0.455775	0.147379	-0.24	0.535	TRUE	443	0.341249	area_poverty_subset	NO	5
443.7	Peripheral angiopathy in diseases classified elsewhere	8	circulatory system	red	330	38510	0.00279435	1.42918	0.492	2.366	TRUE	443.7	2.55372	area_poverty_subset	NO	5
452	Other venous embolism and thrombosis	8	circulatory system	red	1686	30247	0.0145732	0.574698	0.114	1.036	TRUE	452	1.83644	area_poverty_subset	NO	5
452.2	Deep vein thrombosis [DVT]	8	circulatory system	red	1319	30247	0.0161328	0.631527	0.117	1.146	TRUE	452.2	1.79229	area_poverty_subset	NO	5
458	Hypotension	8	circulatory system	red	1734	41904	0.714404	-0.0843492	-0.536	0.367	TRUE	458	0.146056	area_poverty_subset	NO	5
472	Chronic pharyngitis and nasopharyngitis	9	respiratory	coral4	2582	22958	2.39e-10	1.26922	0.876	1.662	TRUE	472	9.62215	area_poverty_subset	YES	5
476	Allergic rhinitis	9	respiratory	coral4	9393	22958	9.97e-21	1.12491	0.889	1.361	TRUE	476	20.0011	area_poverty_subset	YES	5
512.2	Painful respiration	9	respiratory	coral4	1176	21607	0.0985295	0.507874	-0.095	1.11	TRUE	512.2	1.00643	area_poverty_subset	NO	5
513.3	Hypoventilation	9	respiratory	coral4	450	45109	0.0119836	1.0283	0.226	1.83	TRUE	513.3	1.92141	area_poverty_subset	NO	5
585.34	Chronic Kidney Disease, Stage IV	11	genitourinary	black	425	36480	0.000273	1.54663	0.714	2.379	TRUE	585.34	3.56462	area_poverty_subset	NO	5
592	Cystitis and urethritis	11	genitourinary	black	2144	32116	0.0723339	0.379509	-0.034	0.793	TRUE	592	1.14066	area_poverty_subset	NO	5
592.1	Cystitis	11	genitourinary	black	1999	32116	0.677582	0.0915027	-0.34	0.523	TRUE	592.1	0.169038	area_poverty_subset	NO	5
598	Abnormal findings on examination of urine	11	genitourinary	black	878	45259	0.000683	0.995106	0.421	1.569	TRUE	598	3.16574	area_poverty_subset	NO	5
598.4	Other cells and casts in urine	11	genitourinary	black	215	45259	1.3e-15	4.03452	3.045	5.024	TRUE	598.4	14.8854	area_poverty_subset	YES	5
599.2	Retention of urine	11	genitourinary	black	1690	27827	1.99e-06	1.10284	0.648	1.557	TRUE	599.2	5.70213	area_poverty_subset	YES	5
613.7	Other signs and symptoms in breast	11	genitourinary	black	1019	39729	0.000118	1.03576	0.509	1.563	TRUE	613.7	3.92938	area_poverty_subset	NO	5
172.1	Melanomas of skin, dx or hx	2	neoplasms	darkcyan	906	37468	0.504231	-0.22701	-0.893	0.439	TRUE	172.1	0.29737	vacant_housing_subset	NO	5
172.11	Melanomas of skin	2	neoplasms	darkcyan	906	37468	0.504231	-0.22701	-0.893	0.439	TRUE	172.11	0.29737	vacant_housing_subset	NO	5
174	Breast cancer	2	neoplasms	darkcyan	2406	39054	0.00575854	0.586011	0.17	1.002	TRUE	174	2.23969	vacant_housing_subset	NO	5
174.1	Breast cancer [female]	2	neoplasms	darkcyan	2293	20948	0.00161617	0.682419	0.258	1.107	TRUE	174.1	2.79151	vacant_housing_subset	NO	5
195.1	Malignant neoplasm, other	2	neoplasms	darkcyan	706	40611	1.63e-09	1.83216	1.237	2.428	TRUE	195.1	8.78719	vacant_housing_subset	YES	5
245	Thyroiditis	3	endocrine/metabolic	brown	1262	33730	0.325765	-0.293857	-0.88	0.292	TRUE	245	0.487096	vacant_housing_subset	NO	5
260	Protein-calorie malnutrition	3	endocrine/metabolic	brown	573	30089	1.8e-05	1.48711	0.807	2.167	TRUE	260	4.74386	vacant_housing_subset	NO	5
272.13	Mixed hyperlipidemia	3	endocrine/metabolic	brown	7829	19731	0.0101496	0.396941	0.094	0.7	TRUE	272.13	1.99355	vacant_housing_subset	NO	5
275	Disorders of mineral metabolism	3	endocrine/metabolic	brown	2747	42593	0.000738	0.633401	0.266	1.001	TRUE	275	3.13191	vacant_housing_subset	NO	5
279	Disorders involving the immune mechanism	3	endocrine/metabolic	brown	1837	44110	0.844205	0.0485825	-0.436	0.533	TRUE	279	0.0735522	vacant_housing_subset	NO	5
411.3	Angina pectoris	8	circulatory system	red	1775	37728	0.00191217	0.727619	0.268	1.187	TRUE	411.3	2.71847	vacant_housing_subset	NO	5
414	Other forms of chronic heart disease	8	circulatory system	red	955	37728	2.14e-05	1.22377	0.659	1.788	TRUE	414	4.67042	vacant_housing_subset	NO	5
427	Cardiac dysrhythmias	8	circulatory system	red	12944	26813	0.913313	0.0130852	-0.223	0.249	TRUE	427	0.0393804	vacant_housing_subset	NO	5
427.5	Arrhythmia (cardiac) NOS	8	circulatory system	red	2360	26813	0.808732	-0.0575394	-0.523	0.408	TRUE	427.5	0.0921955	vacant_housing_subset	NO	5
427.7	Tachycardia NOS	8	circulatory system	red	2182	26813	0.261373	0.275608	-0.205	0.757	TRUE	427.7	0.582739	vacant_housing_subset	NO	5
433.2	Occlusion of cerebral arteries	8	circulatory system	red	1063	41932	0.00189917	0.875177	0.323	1.428	TRUE	433.2	2.72144	vacant_housing_subset	NO	5
433.8	Late effects of cerebrovascular disease	8	circulatory system	red	375	41932	0.000117	1.6215	0.797	2.446	TRUE	433.8	3.93311	vacant_housing_subset	NO	5
443	Peripheral vascular disease	8	circulatory system	red	2291	38510	0.0105906	0.531592	0.124	0.939	TRUE	443	1.97508	vacant_housing_subset	NO	5
443.7	Peripheral angiopathy in diseases classified elsewhere	8	circulatory system	red	330	38510	0.00323485	1.38132	0.462	2.301	TRUE	443.7	2.49015	vacant_housing_subset	NO	5
452	Other venous embolism and thrombosis	8	circulatory system	red	1686	30247	3.87e-07	1.1478	0.705	1.591	TRUE	452	6.41191	vacant_housing_subset	YES	5
452.2	Deep vein thrombosis [DVT]	8	circulatory system	red	1319	30247	3.64e-06	1.15725	0.667	1.647	TRUE	452.2	5.43871	vacant_housing_subset	YES	5
458	Hypotension	8	circulatory system	red	1734	41904	0.00223103	0.717476	0.258	1.177	TRUE	458	2.65149	vacant_housing_subset	NO	5
472	Chronic pharyngitis and nasopharyngitis	9	respiratory	coral4	2582	22958	0.66816	-0.0959058	-0.534	0.343	TRUE	472	0.175119	vacant_housing_subset	NO	5
476	Allergic rhinitis	9	respiratory	coral4	9393	22958	0.00549605	0.367988	0.108	0.628	TRUE	476	2.25995	vacant_housing_subset	NO	5
512.2	Painful respiration	9	respiratory	coral4	1176	21607	0.708078	0.126531	-0.536	0.789	TRUE	512.2	0.149919	vacant_housing_subset	NO	5
513.3	Hypoventilation	9	respiratory	coral4	450	45109	0.0325322	0.909733	0.076	1.744	TRUE	513.3	1.48769	vacant_housing_subset	NO	5
585.34	Chronic Kidney Disease, Stage IV	11	genitourinary	black	425	36480	0.0202275	1.00077	0.156	1.845	TRUE	585.34	1.69406	vacant_housing_subset	NO	5
592	Cystitis and urethritis	11	genitourinary	black	2144	32116	0.838812	-0.0483685	-0.514	0.418	TRUE	592	0.0763353	vacant_housing_subset	NO	5
592.1	Cystitis	11	genitourinary	black	1999	32116	0.752114	-0.0776031	-0.559	0.404	TRUE	592.1	0.123717	vacant_housing_subset	NO	5
598	Abnormal findings on examination of urine	11	genitourinary	black	878	45259	0.787171	0.0900083	-0.563	0.743	TRUE	598	0.103931	vacant_housing_subset	NO	5
598.4	Other cells and casts in urine	11	genitourinary	black	215	45259	0.0102972	1.39356	0.329	2.458	TRUE	598.4	1.98728	vacant_housing_subset	NO	5
599.2	Retention of urine	11	genitourinary	black	1690	27827	0.00116281	0.763868	0.303	1.225	TRUE	599.2	2.93449	vacant_housing_subset	NO	5
613.7	Other signs and symptoms in breast	11	genitourinary	black	1019	39729	0.108249	0.488194	-0.108	1.084	TRUE	613.7	0.965577	vacant_housing_subset	NO	5
172.1	Melanomas of skin, dx or hx	2	neoplasms	darkcyan	906	37468	0.00292645	-0.819614	-1.36	-0.28	TRUE	172.1	2.53366	deprivation_index_subset	NO	5
172.11	Melanomas of skin	2	neoplasms	darkcyan	906	37468	0.00292645	-0.819614	-1.36	-0.28	TRUE	172.11	2.53366	deprivation_index_subset	NO	5
174	Breast cancer	2	neoplasms	darkcyan	2406	39054	0.205714	-0.229334	-0.585	0.126	TRUE	174	0.686736	deprivation_index_subset	NO	5
174.1	Breast cancer [female]	2	neoplasms	darkcyan	2293	20948	0.514457	-0.120997	-0.485	0.243	TRUE	174.1	0.288651	deprivation_index_subset	NO	5
195.1	Malignant neoplasm, other	2	neoplasms	darkcyan	706	40611	1.95e-21	2.76817	2.198	3.339	TRUE	195.1	20.711	deprivation_index_subset	YES	5
245	Thyroiditis	3	endocrine/metabolic	brown	1262	33730	2.03e-06	-1.12665	-1.592	-0.662	TRUE	245	5.69226	deprivation_index_subset	YES	5
260	Protein-calorie malnutrition	3	endocrine/metabolic	brown	573	30089	0.000724	1.12941	0.475	1.784	TRUE	260	3.14006	deprivation_index_subset	NO	5
272.13	Mixed hyperlipidemia	3	endocrine/metabolic	brown	7829	19731	1.56e-06	0.616074	0.365	0.867	TRUE	272.13	5.80732	deprivation_index_subset	YES	5
275	Disorders of mineral metabolism	3	endocrine/metabolic	brown	2747	42593	7.88e-08	0.844194	0.536	1.152	TRUE	275	7.10344	deprivation_index_subset	YES	5
279	Disorders involving the immune mechanism	3	endocrine/metabolic	brown	1837	44110	1.23e-14	-1.55264	-1.947	-1.158	TRUE	279	13.9098	deprivation_index_subset	YES	5
411.3	Angina pectoris	8	circulatory system	red	1775	37728	0.727424	-0.0717097	-0.475	0.332	TRUE	411.3	0.138212	deprivation_index_subset	NO	5
414	Other forms of chronic heart disease	8	circulatory system	red	955	37728	3.66e-13	1.86426	1.362	2.367	TRUE	414	12.437	deprivation_index_subset	YES	5
427	Cardiac dysrhythmias	8	circulatory system	red	12944	26813	0.0158456	-0.231428	-0.419	-0.043	TRUE	427	1.80009	deprivation_index_subset	NO	5
427.5	Arrhythmia (cardiac) NOS	8	circulatory system	red	2360	26813	1.98e-18	-1.73522	-2.124	-1.347	TRUE	427.5	17.7023	deprivation_index_subset	YES	5
427.7	Tachycardia NOS	8	circulatory system	red	2182	26813	0.454275	-0.145842	-0.528	0.236	TRUE	427.7	0.342681	deprivation_index_subset	NO	5
433.2	Occlusion of cerebral arteries	8	circulatory system	red	1063	41932	0.00145413	0.778711	0.299	1.258	TRUE	433.2	2.8374	deprivation_index_subset	NO	5
433.8	Late effects of cerebrovascular disease	8	circulatory system	red	375	41932	0.000152	1.4965	0.722	2.271	TRUE	433.8	3.8171	deprivation_index_subset	NO	5
443	Peripheral vascular disease	8	circulatory system	red	2291	38510	0.122778	0.269868	-0.073	0.613	TRUE	443	0.910878	deprivation_index_subset	NO	5
443.7	Peripheral angiopathy in diseases classified elsewhere	8	circulatory system	red	330	38510	0.00314498	1.27329	0.428	2.118	TRUE	443.7	2.50238	deprivation_index_subset	NO	5
452	Other venous embolism and thrombosis	8	circulatory system	red	1686	30247	2.68e-06	0.970138	0.565	1.375	TRUE	452	5.57108	deprivation_index_subset	YES	5
452.2	Deep vein thrombosis [DVT]	8	circulatory system	red	1319	30247	4.57e-06	1.05649	0.605	1.508	TRUE	452.2	5.33974	deprivation_index_subset	YES	5
458	Hypotension	8	circulatory system	red	1734	41904	0.398868	0.170279	-0.225	0.566	TRUE	458	0.399171	deprivation_index_subset	NO	5
472	Chronic pharyngitis and nasopharyngitis	9	respiratory	coral4	2582	22958	3.08e-07	0.910467	0.562	1.259	TRUE	472	6.51171	deprivation_index_subset	YES	5
476	Allergic rhinitis	9	respiratory	coral4	9393	22958	1.11e-13	0.793819	0.584	1.003	TRUE	476	12.9543	deprivation_index_subset	YES	5
512.2	Painful respiration	9	respiratory	coral4	1176	21607	0.173229	0.372357	-0.164	0.908	TRUE	512.2	0.761379	deprivation_index_subset	NO	5
513.3	Hypoventilation	9	respiratory	coral4	450	45109	0.00198315	1.13059	0.414	1.847	TRUE	513.3	2.70264	deprivation_index_subset	NO	5
585.34	Chronic Kidney Disease, Stage IV	11	genitourinary	black	425	36480	1.04e-06	1.85813	1.113	2.604	TRUE	585.34	5.98492	deprivation_index_subset	YES	5
592	Cystitis and urethritis	11	genitourinary	black	2144	32116	0.0912564	0.318497	-0.051	0.688	TRUE	592	1.03974	deprivation_index_subset	NO	5
592.1	Cystitis	11	genitourinary	black	1999	32116	0.485067	0.136387	-0.246	0.519	TRUE	592.1	0.314198	deprivation_index_subset	NO	5
598	Abnormal findings on examination of urine	11	genitourinary	black	878	45259	6.19e-07	1.30238	0.79	1.814	TRUE	598	6.20848	deprivation_index_subset	YES	5
598.4	Other cells and casts in urine	11	genitourinary	black	215	45259	2.04e-24	4.8321	3.903	5.761	TRUE	598.4	23.6911	deprivation_index_subset	YES	5
599.2	Retention of urine	11	genitourinary	black	1690	27827	8.82e-06	0.918144	0.513	1.323	TRUE	599.2	5.05431	deprivation_index_subset	NO	5
613.7	Other signs and symptoms in breast	11	genitourinary	black	1019	39729	6.56e-09	1.42568	0.944	1.907	TRUE	613.7	8.18317	deprivation_index_subset	YES	5
174.11	Malignant neoplasm of female breast	2	neoplasms	darkcyan	2142	20948	2.52e-05	-0.63049	-0.924	-0.337	TRUE	174.11	4.59789	SDOH	NO	4
195	Cancer, suspected or other	2	neoplasms	darkcyan	1138	40611	0.0963713	-0.318007	-0.693	0.057	TRUE	195	1.01605	SDOH	NO	4
199	Neoplasm of uncertain behavior	2	neoplasms	darkcyan	2006	40611	0.0097997	-0.384216	-0.676	-0.093	TRUE	199	2.00879	SDOH	NO	4
245.2	Chronic thyroiditis	3	endocrine/metabolic	brown	1139	33730	0.000735	-0.653383	-1.033	-0.274	TRUE	245.2	3.134	SDOH	NO	4
245.21	Chronic lymphocytic thyroiditis	3	endocrine/metabolic	brown	1130	33730	0.000656	-0.662456	-1.044	-0.281	TRUE	245.21	3.18305	SDOH	NO	4
274	Gout and other crystal arthropathies	3	endocrine/metabolic	brown	1850	44703	6.43e-11	0.949224	0.664	1.234	TRUE	274	10.1918	SDOH	YES	4
418.1	Precordial pain	8	circulatory system	red	772	29705	2.64e-12	1.55543	1.12	1.991	TRUE	418.1	11.5789	SDOH	YES	4
427.6	Premature beats	8	circulatory system	red	1704	26813	0.039996	-0.35751	-0.699	-0.016	TRUE	427.6	1.39798	SDOH	NO	4
433.21	Cerebral artery occlusion, with cerebral infarction	8	circulatory system	red	1023	41932	7.48e-10	1.12167	0.765	1.479	TRUE	433.21	9.12595	SDOH	YES	4
464	Acute sinusitis	9	respiratory	coral4	5288	24485	0.0409688	0.2105	0.009	0.412	TRUE	464	1.38755	SDOH	NO	4
465	Acute upper respiratory infections of multiple or unspecified sites	9	respiratory	coral4	11634	24485	1.47e-05	0.332776	0.182	0.483	TRUE	465	4.83219	SDOH	NO	4
465.2	Acute pharyngitis	9	respiratory	coral4	5311	24485	0.00217556	0.318988	0.115	0.523	TRUE	465.2	2.66243	SDOH	NO	4
473	Diseases of the larynx and vocal cords	9	respiratory	coral4	2392	22958	0.891088	0.0196417	-0.262	0.301	TRUE	473	0.0500795	SDOH	NO	4
473.4	Voice disturbance	9	respiratory	coral4	1822	22958	0.910735	0.0181465	-0.299	0.335	TRUE	473.4	0.0406078	SDOH	NO	4
480	Pneumonia	9	respiratory	coral4	2708	35749	6.49e-14	0.920958	0.68	1.162	TRUE	480	13.1878	SDOH	YES	4
513	Respiratory abnormalities	9	respiratory	coral4	793	45109	1.67e-05	0.880245	0.48	1.281	TRUE	513	4.7782	SDOH	NO	4
587	Kidney replaced by transpant	11	genitourinary	black	295	36480	6.12e-06	1.46883	0.832	2.105	TRUE	587	5.21292	SDOH	YES	4
599.9	Other abnormality of urination	11	genitourinary	black	2374	27827	0.000583	0.476121	0.205	0.747	TRUE	599.9	3.2341	SDOH	NO	4
611.3	Lump or mass in breast	11	genitourinary	black	2797	33065	1.41e-05	-0.606953	-0.881	-0.333	TRUE	611.3	4.85064	SDOH	NO	4
627.5	Premature menopause and other ovarian failure	11	genitourinary	black	1076	12448	0.000139	-0.804391	-1.218	-0.391	TRUE	627.5	3.85824	SDOH	NO	4
174.11	Malignant neoplasm of female breast	2	neoplasms	darkcyan	2142	20948	1.14e-08	-1.14255	-1.535	-0.75	TRUE	174.11	7.94351	SCC	YES	4
195	Cancer, suspected or other	2	neoplasms	darkcyan	1138	40611	0.224166	-0.30822	-0.805	0.189	TRUE	195	0.649429	SCC	NO	4
199	Neoplasm of uncertain behavior	2	neoplasms	darkcyan	2006	40611	0.0161141	-0.46577	-0.845	-0.086	TRUE	199	1.79279	SCC	NO	4
245.2	Chronic thyroiditis	3	endocrine/metabolic	brown	1139	33730	0.500676	0.162282	-0.31	0.635	TRUE	245.2	0.300443	SCC	NO	4
245.21	Chronic lymphocytic thyroiditis	3	endocrine/metabolic	brown	1130	33730	0.477609	0.171694	-0.302	0.646	TRUE	245.21	0.320927	SCC	NO	4
274	Gout and other crystal arthropathies	3	endocrine/metabolic	brown	1850	44703	0.150907	0.293313	-0.107	0.694	TRUE	274	0.82129	SCC	NO	4
418.1	Precordial pain	8	circulatory system	red	772	29705	7.2e-05	1.25531	0.636	1.875	TRUE	418.1	4.14277	SCC	NO	4
427.6	Premature beats	8	circulatory system	red	1704	26813	0.317827	-0.224188	-0.664	0.216	TRUE	427.6	0.497809	SCC	NO	4
433.21	Cerebral artery occlusion, with cerebral infarction	8	circulatory system	red	1023	41932	1.44e-05	1.11352	0.61	1.617	TRUE	433.21	4.84032	SCC	NO	4
464	Acute sinusitis	9	respiratory	coral4	5288	24485	0.182617	-0.177739	-0.439	0.084	TRUE	464	0.738458	SCC	NO	4
465	Acute upper respiratory infections of multiple or unspecified sites	9	respiratory	coral4	11634	24485	0.620929	-0.0496012	-0.246	0.147	TRUE	465	0.206958	SCC	NO	4
465.2	Acute pharyngitis	9	respiratory	coral4	5311	24485	0.152011	-0.193478	-0.458	0.071	TRUE	465.2	0.818124	SCC	NO	4
473	Diseases of the larynx and vocal cords	9	respiratory	coral4	2392	22958	2.63e-08	1.03271	0.669	1.396	TRUE	473	7.57964	SCC	YES	4
473.4	Voice disturbance	9	respiratory	coral4	1822	22958	5e-08	1.1387	0.729	1.548	TRUE	473.4	7.30138	SCC	YES	4
480	Pneumonia	9	respiratory	coral4	2708	35749	0.000152	0.637	0.307	0.967	TRUE	480	3.81912	SCC	NO	4
513	Respiratory abnormalities	9	respiratory	coral4	793	45109	2.68e-07	1.4246	0.882	1.967	TRUE	513	6.57109	SCC	YES	4
587	Kidney replaced by transpant	11	genitourinary	black	295	36480	0.0370849	-1.02286	-1.984	-0.061	TRUE	587	1.4308	SCC	NO	4
599.9	Other abnormality of urination	11	genitourinary	black	2374	27827	1.63e-13	1.33574	0.981	1.691	TRUE	599.9	12.7877	SCC	YES	4
611.3	Lump or mass in breast	11	genitourinary	black	2797	33065	0.00290566	-0.538076	-0.892	-0.184	TRUE	611.3	2.53676	SCC	NO	4
627.5	Premature menopause and other ovarian failure	11	genitourinary	black	1076	12448	0.97683	-0.00802	-0.549	0.533	TRUE	627.5	0.0101808	SCC	NO	4
174.11	Malignant neoplasm of female breast	2	neoplasms	darkcyan	2142	20948	4.72e-05	-0.664971	-0.985	-0.345	TRUE	174.11	4.32648	NBD	NO	4
195	Cancer, suspected or other	2	neoplasms	darkcyan	1138	40611	0.0653749	-0.385771	-0.796	0.025	TRUE	195	1.18459	NBD	NO	4
199	Neoplasm of uncertain behavior	2	neoplasms	darkcyan	2006	40611	0.742859	-0.0508635	-0.355	0.253	TRUE	199	0.129094	NBD	NO	4
245.2	Chronic thyroiditis	3	endocrine/metabolic	brown	1139	33730	4.6e-09	-1.24176	-1.657	-0.827	TRUE	245.2	8.33733	NBD	YES	4
245.21	Chronic lymphocytic thyroiditis	3	endocrine/metabolic	brown	1130	33730	1.7e-09	-1.28563	-1.704	-0.867	TRUE	245.21	8.76839	NBD	YES	4
274	Gout and other crystal arthropathies	3	endocrine/metabolic	brown	1850	44703	0.000358	0.570463	0.257	0.884	TRUE	274	3.44596	NBD	NO	4
418.1	Precordial pain	8	circulatory system	red	772	29705	0.238552	0.30537	-0.202	0.813	TRUE	418.1	0.622416	NBD	NO	4
427.6	Premature beats	8	circulatory system	red	1704	26813	6.47e-05	-0.758328	-1.13	-0.386	TRUE	427.6	4.18904	NBD	NO	4
433.21	Cerebral artery occlusion, with cerebral infarction	8	circulatory system	red	1023	41932	1.13e-05	0.882385	0.489	1.276	TRUE	433.21	4.94741	NBD	NO	4
464	Acute sinusitis	9	respiratory	coral4	5288	24485	1.25e-11	-0.764104	-0.985	-0.543	TRUE	464	10.9031	NBD	YES	4
465	Acute upper respiratory infections of multiple or unspecified sites	9	respiratory	coral4	11634	24485	0.303019	-0.0838253	-0.243	0.076	TRUE	465	0.51853	NBD	NO	4
465.2	Acute pharyngitis	9	respiratory	coral4	5311	24485	0.000815	-0.369912	-0.586	-0.153	TRUE	465.2	3.08865	NBD	NO	4
473	Diseases of the larynx and vocal cords	9	respiratory	coral4	2392	22958	0.0471385	0.300771	0.004	0.598	TRUE	473	1.32662	NBD	NO	4
473.4	Voice disturbance	9	respiratory	coral4	1822	22958	0.106414	0.277074	-0.059	0.613	TRUE	473.4	0.973001	NBD	NO	4
480	Pneumonia	9	respiratory	coral4	2708	35749	0.0793645	0.24102	-0.028	0.51	TRUE	480	1.10037	NBD	NO	4
513	Respiratory abnormalities	9	respiratory	coral4	793	45109	0.00999825	0.577678	0.138	1.017	TRUE	513	2.00008	NBD	NO	4
587	Kidney replaced by transpant	11	genitourinary	black	295	36480	0.0288254	0.785278	0.081	1.489	TRUE	587	1.54022	NBD	NO	4
599.9	Other abnormality of urination	11	genitourinary	black	2374	27827	0.0168431	0.358681	0.065	0.653	TRUE	599.9	1.77358	NBD	NO	4
611.3	Lump or mass in breast	11	genitourinary	black	2797	33065	0.166014	-0.201171	-0.486	0.083	TRUE	611.3	0.779856	NBD	NO	4
627.5	Premature menopause and other ovarian failure	11	genitourinary	black	1076	12448	0.00172353	-0.731014	-1.188	-0.274	TRUE	627.5	2.76358	NBD	NO	4
174.11	Malignant neoplasm of female breast	2	neoplasms	darkcyan	2142	20948	1.44e-17	-1.42062	-1.747	-1.094	TRUE	174.11	16.8431	ES	YES	4
195	Cancer, suspected or other	2	neoplasms	darkcyan	1138	40611	0.0300369	-0.442826	-0.843	-0.043	TRUE	195	1.52235	ES	NO	4
199	Neoplasm of uncertain behavior	2	neoplasms	darkcyan	2006	40611	1.24e-07	-0.852275	-1.168	-0.536	TRUE	199	6.90642	ES	YES	4
245.2	Chronic thyroiditis	3	endocrine/metabolic	brown	1139	33730	0.000262	-0.686058	-1.054	-0.318	TRUE	245.2	3.5825	ES	NO	4
245.21	Chronic lymphocytic thyroiditis	3	endocrine/metabolic	brown	1130	33730	0.00037	-0.670502	-1.04	-0.301	TRUE	245.21	3.43162	ES	NO	4
274	Gout and other crystal arthropathies	3	endocrine/metabolic	brown	1850	44703	1.84e-06	0.750594	0.442	1.059	TRUE	274	5.73447	ES	YES	4
418.1	Precordial pain	8	circulatory system	red	772	29705	6.15e-10	1.43481	0.98	1.889	TRUE	418.1	9.21098	ES	YES	4
427.6	Premature beats	8	circulatory system	red	1704	26813	0.00517747	-0.52306	-0.89	-0.156	TRUE	427.6	2.28588	ES	NO	4
433.21	Cerebral artery occlusion, with cerebral infarction	8	circulatory system	red	1023	41932	2.54e-25	1.85274	1.503	2.202	TRUE	433.21	24.5946	ES	YES	4
464	Acute sinusitis	9	respiratory	coral4	5288	24485	0.000235	-0.376038	-0.576	-0.176	TRUE	464	3.62967	ES	NO	4
465	Acute upper respiratory infections of multiple or unspecified sites	9	respiratory	coral4	11634	24485	0.502105	0.0502152	-0.096	0.197	TRUE	465	0.299205	ES	NO	4
465.2	Acute pharyngitis	9	respiratory	coral4	5311	24485	0.0267864	-0.221406	-0.417	-0.025	TRUE	465.2	1.57208	ES	NO	4
473	Diseases of the larynx and vocal cords	9	respiratory	coral4	2392	22958	0.000468	0.493101	0.217	0.769	TRUE	473	3.32971	ES	NO	4
473.4	Voice disturbance	9	respiratory	coral4	1822	22958	0.00027	0.57873	0.267	0.89	TRUE	473.4	3.56913	ES	NO	4
480	Pneumonia	9	respiratory	coral4	2708	35749	5.03e-17	1.02716	0.787	1.267	TRUE	480	16.2988	ES	YES	4
513	Respiratory abnormalities	9	respiratory	coral4	793	45109	1.65e-11	1.32275	0.938	1.708	TRUE	513	10.7825	ES	YES	4
587	Kidney replaced by transpant	11	genitourinary	black	295	36480	0.00164035	1.04173	0.393	1.69	TRUE	587	2.78506	ES	NO	4
599.9	Other abnormality of urination	11	genitourinary	black	2374	27827	1.96e-12	0.973218	0.702	1.244	TRUE	599.9	11.7083	ES	YES	4
611.3	Lump or mass in breast	11	genitourinary	black	2797	33065	8.46e-13	-1.0098	-1.286	-0.733	TRUE	611.3	12.0726	ES	YES	4
627.5	Premature menopause and other ovarian failure	11	genitourinary	black	1076	12448	0.000161	-0.867157	-1.318	-0.417	TRUE	627.5	3.79192	ES	NO	4
174.11	Malignant neoplasm of female breast	2	neoplasms	darkcyan	2142	20948	1.71e-07	-0.983908	-1.353	-0.615	TRUE	174.11	6.76724	HCAU	YES	4
195	Cancer, suspected or other	2	neoplasms	darkcyan	1138	40611	0.997398	-0.000795	-0.479	0.477	TRUE	195	0.00113151	HCAU	NO	4
199	Neoplasm of uncertain behavior	2	neoplasms	darkcyan	2006	40611	0.137622	-0.278918	-0.647	0.089	TRUE	199	0.861312	HCAU	NO	4
245.2	Chronic thyroiditis	3	endocrine/metabolic	brown	1139	33730	0.00226598	0.670024	0.24	1.1	TRUE	245.2	2.64474	HCAU	NO	4
245.21	Chronic lymphocytic thyroiditis	3	endocrine/metabolic	brown	1130	33730	0.00160921	0.694305	0.263	1.126	TRUE	245.21	2.79339	HCAU	NO	4
274	Gout and other crystal arthropathies	3	endocrine/metabolic	brown	1850	44703	3.94e-06	0.918274	0.528	1.308	TRUE	274	5.40407	HCAU	YES	4
418.1	Precordial pain	8	circulatory system	red	772	29705	1.81e-05	1.28781	0.699	1.877	TRUE	418.1	4.7415	HCAU	NO	4
427.6	Premature beats	8	circulatory system	red	1704	26813	0.0855252	0.370059	-0.052	0.792	TRUE	427.6	1.06791	HCAU	NO	4
433.21	Cerebral artery occlusion, with cerebral infarction	8	circulatory system	red	1023	41932	9.84e-09	1.41001	0.928	1.892	TRUE	433.21	8.00716	HCAU	YES	4
464	Acute sinusitis	9	respiratory	coral4	5288	24485	0.00571926	0.339807	0.099	0.581	TRUE	464	2.24266	HCAU	NO	4
465	Acute upper respiratory infections of multiple or unspecified sites	9	respiratory	coral4	11634	24485	0.237627	0.110529	-0.073	0.294	TRUE	465	0.624103	HCAU	NO	4
465.2	Acute pharyngitis	9	respiratory	coral4	5311	24485	0.755305	0.038594	-0.204	0.281	TRUE	465.2	0.121878	HCAU	NO	4
473	Diseases of the larynx and vocal cords	9	respiratory	coral4	2392	22958	9.86e-13	1.2513	0.907	1.595	TRUE	473	12.0063	HCAU	YES	4
473.4	Voice disturbance	9	respiratory	coral4	1822	22958	3.46e-11	1.31483	0.926	1.704	TRUE	473.4	10.4604	HCAU	YES	4
480	Pneumonia	9	respiratory	coral4	2708	35749	1.49e-09	0.971503	0.657	1.286	TRUE	480	8.82696	HCAU	YES	4
513	Respiratory abnormalities	9	respiratory	coral4	793	45109	6.74e-10	1.62641	1.11	2.143	TRUE	513	9.17129	HCAU	YES	4
587	Kidney replaced by transpant	11	genitourinary	black	295	36480	0.540507	0.27949	-0.616	1.175	TRUE	587	0.267198	HCAU	NO	4
599.9	Other abnormality of urination	11	genitourinary	black	2374	27827	3.68e-15	1.36421	1.024	1.704	TRUE	599.9	14.4343	HCAU	YES	4
611.3	Lump or mass in breast	11	genitourinary	black	2797	33065	5.4e-06	-0.76696	-1.097	-0.436	TRUE	611.3	5.2678	HCAU	YES	4
627.5	Premature menopause and other ovarian failure	11	genitourinary	black	1076	12448	0.0491378	-0.511246	-1.021	-0.002	TRUE	627.5	1.30858	HCAU	NO	4
174.11	Malignant neoplasm of female breast	2	neoplasms	darkcyan	2142	20574	3.68e-08	-0.517063	-0.701	-0.333	TRUE	174.11	7.43395	education	YES	4
195	Cancer, suspected or other	2	neoplasms	darkcyan	1138	39883	0.000488	-0.424456	-0.663	-0.186	TRUE	195	3.31147	education	NO	4
199	Neoplasm of uncertain behavior	2	neoplasms	darkcyan	2006	39883	1.07e-05	-0.41298	-0.597	-0.229	TRUE	199	4.97172	education	NO	4
245.2	Chronic thyroiditis	3	endocrine/metabolic	brown	1139	33002	0.00032	-0.438588	-0.677	-0.2	TRUE	245.2	3.49444	education	NO	4
245.21	Chronic lymphocytic thyroiditis	3	endocrine/metabolic	brown	1130	33002	0.000337	-0.438594	-0.678	-0.199	TRUE	245.21	3.47195	education	NO	4
274	Gout and other crystal arthropathies	3	endocrine/metabolic	brown	1850	43975	1.45e-11	0.631256	0.448	0.814	TRUE	274	10.8385	education	YES	4
418.1	Precordial pain	8	circulatory system	red	772	28977	4.43e-12	1.01777	0.73	1.306	TRUE	418.1	11.3536	education	YES	4
427.6	Premature beats	8	circulatory system	red	1704	26085	0.000351	-0.38645	-0.598	-0.175	TRUE	427.6	3.45472	education	NO	4
433.21	Cerebral artery occlusion, with cerebral infarction	8	circulatory system	red	1023	41204	2.12e-10	0.764165	0.528	1	TRUE	433.21	9.6738	education	YES	4
464	Acute sinusitis	9	respiratory	coral4	5288	23757	5.81e-05	0.263036	0.135	0.391	TRUE	464	4.2359	education	NO	4
465	Acute upper respiratory infections of multiple or unspecified sites	9	respiratory	coral4	11634	23757	2.26e-09	0.296019	0.199	0.393	TRUE	465	8.64644	education	YES	4
465.2	Acute pharyngitis	9	respiratory	coral4	5311	23757	0.000219	0.249826	0.117	0.382	TRUE	465.2	3.65904	education	NO	4
473	Diseases of the larynx and vocal cords	9	respiratory	coral4	2392	22230	0.0318613	-0.196552	-0.376	-0.017	TRUE	473	1.49674	education	NO	4
473.4	Voice disturbance	9	respiratory	coral4	1822	22230	0.134807	-0.154039	-0.356	0.048	TRUE	473.4	0.870286	education	NO	4
480	Pneumonia	9	respiratory	coral4	2708	35021	1.07e-19	0.724588	0.568	0.881	TRUE	480	18.9712	education	YES	4
513	Respiratory abnormalities	9	respiratory	coral4	793	44381	2.94e-06	0.636244	0.37	0.903	TRUE	513	5.53177	education	YES	4
587	Kidney replaced by transpant	11	genitourinary	black	295	35752	3.48e-08	1.22574	0.79	1.661	TRUE	587	7.45877	education	YES	4
599.9	Other abnormality of urination	11	genitourinary	black	2374	27099	0.000325	0.317144	0.144	0.49	TRUE	599.9	3.48804	education	NO	4
611.3	Lump or mass in breast	11	genitourinary	black	2797	32337	3.3e-12	-0.622384	-0.798	-0.447	TRUE	611.3	11.4818	education	YES	4
627.5	Premature menopause and other ovarian failure	11	genitourinary	black	1076	12074	8.17e-06	-0.58448	-0.841	-0.328	TRUE	627.5	5.08785	education	NO	4
174.11	Malignant neoplasm of female breast	2	neoplasms	darkcyan	2142	20948	0.0474778	-0.320213	-0.637	-0.004	TRUE	174.11	1.32351	median_income_subset	NO	4
195	Cancer, suspected or other	2	neoplasms	darkcyan	1138	40611	0.189607	0.271721	-0.134	0.678	TRUE	195	0.722146	median_income_subset	NO	4
199	Neoplasm of uncertain behavior	2	neoplasms	darkcyan	2006	40611	0.0204829	0.371373	0.057	0.685	TRUE	199	1.68861	median_income_subset	NO	4
245.2	Chronic thyroiditis	3	endocrine/metabolic	brown	1139	33730	0.599709	-0.110905	-0.525	0.303	TRUE	245.2	0.222059	median_income_subset	NO	4
245.21	Chronic lymphocytic thyroiditis	3	endocrine/metabolic	brown	1130	33730	0.64046	-0.099192	-0.515	0.317	TRUE	245.21	0.193508	median_income_subset	NO	4
274	Gout and other crystal arthropathies	3	endocrine/metabolic	brown	1850	44703	0.000595	0.568202	0.244	0.893	TRUE	274	3.22553	median_income_subset	NO	4
[truncated: 4,671 more rows]

## Sheet: S2
Supplementary Table 6 (S2): PheWAS results in SES Cohort across 9 predictors
phecode	description	groupnum	group	color	cases	control	p_value	beta_ind	conf_int_1	conf_int_2	converged	code_val	neg_p_log_10	Domain	sig	number_of_associations
216	Benign neoplasm of skin	2	neoplasms	darkcyan	15712	75434	1e-300	-3.15303	-3.062	-3.244	TRUE	216	300	income_SES_subset	YES	9
228	Hemangioma and lymphangioma, any site	2	neoplasms	darkcyan	5642	91586	1e-300	-2.62598	-2.5	-2.752	TRUE	228	300	income_SES_subset	YES	9
228.1	Hemangioma of skin and subcutaneous tissue	2	neoplasms	darkcyan	4556	91586	1e-300	-2.85471	-2.717	-2.992	TRUE	228.1	300	income_SES_subset	YES	9
249	Secondary diabetes mellitus	3	endocrine/metabolic	brown	1649	61523	4.16e-90	4.00699	4.397	3.617	TRUE	249	89.3806	income_SES_subset	YES	9
250	Diabetes mellitus	3	endocrine/metabolic	brown	21482	61523	1e-300	3.17658	3.285	3.068	TRUE	250	300	income_SES_subset	YES	9
250.1	Type 1 diabetes	3	endocrine/metabolic	brown	2319	61523	6.66e-76	2.74073	3.032	2.449	TRUE	250.1	75.1762	income_SES_subset	YES	9
250.2	Type 2 diabetes	3	endocrine/metabolic	brown	21182	61523	1e-300	3.23936	3.35	3.129	TRUE	250.2	300	income_SES_subset	YES	9
250.22	Type 2 diabetes with renal manifestations	3	endocrine/metabolic	brown	4311	61523	3.92e-263	4.50393	4.759	4.249	TRUE	250.22	262.407	income_SES_subset	YES	9
250.23	Type 2 diabetes with ophthalmic manifestations	3	endocrine/metabolic	brown	2223	61523	1.89e-140	4.47339	4.821	4.126	TRUE	250.23	139.723	income_SES_subset	YES	9
250.24	Type 2 diabetes with neurological manifestations	3	endocrine/metabolic	brown	5783	61523	1e-300	4.97397	5.209	4.739	TRUE	250.24	300	income_SES_subset	YES	9
250.25	Diabetes type 2 with peripheral circulatory disorders	3	endocrine/metabolic	brown	2123	61523	2.28e-130	4.31305	4.661	3.965	TRUE	250.25	129.643	income_SES_subset	YES	9
250.42	Other abnormal glucose	3	endocrine/metabolic	brown	12236	61523	4.7e-45	0.798606	0.91	0.687	TRUE	250.42	44.3277	income_SES_subset	YES	9
250.6	Polyneuropathy in diabetes	3	endocrine/metabolic	brown	3592	61523	1.11e-243	4.96083	5.252	4.669	TRUE	250.6	242.954	income_SES_subset	YES	9
260	Protein-calorie malnutrition	3	endocrine/metabolic	brown	2156	64601	7.04e-95	3.47496	3.805	3.145	TRUE	260	94.1526	income_SES_subset	YES	9
271	Disorders of carbohydrate transport and metabolism	3	endocrine/metabolic	brown	8110	90520	2.32e-39	0.873625	1.004	0.743	TRUE	271	38.6345	income_SES_subset	YES	9
271.3	Intestinal disaccharidase deficiencies and disaccharide malabsorption	3	endocrine/metabolic	brown	7966	90520	4.1e-39	0.878384	1.01	0.747	TRUE	271.3	38.3877	income_SES_subset	YES	9
275	Disorders of mineral metabolism	3	endocrine/metabolic	brown	7051	90703	5.02e-63	1.262	1.41	1.114	TRUE	275	62.2993	income_SES_subset	YES	9
275.3	Disorders of magnesium metabolism	3	endocrine/metabolic	brown	2500	90703	1.67e-113	3.60371	3.916	3.292	TRUE	275.3	112.777	income_SES_subset	YES	9
275.5	Disorders of calcium/phosphorus metabolism	3	endocrine/metabolic	brown	2312	90703	2.63e-28	1.45817	1.717	1.199	TRUE	275.5	27.5808	income_SES_subset	YES	9
275.53	Disorders of phosphorus metabolism	3	endocrine/metabolic	brown	1023	90703	8.15e-33	2.72739	3.175	2.279	TRUE	275.53	32.0886	income_SES_subset	YES	9
276	Disorders of fluid, electrolyte, and acid-base balance	3	endocrine/metabolic	brown	15251	76271	1e-300	2.44986	2.567	2.333	TRUE	276	300	income_SES_subset	YES	9
276.1	Electrolyte imbalance	3	endocrine/metabolic	brown	12172	76271	6.25e-277	2.31169	2.439	2.184	TRUE	276.1	276.204	income_SES_subset	YES	9
276.12	Hyposmolality and/or hyponatremia	3	endocrine/metabolic	brown	3778	76271	1.97e-77	1.99742	2.208	1.787	TRUE	276.12	76.7064	income_SES_subset	YES	9
276.13	Hyperpotassemia	3	endocrine/metabolic	brown	3268	76271	7.97e-94	2.5095	2.749	2.27	TRUE	276.13	93.0983	income_SES_subset	YES	9
276.4	Acid-base balance disorder	3	endocrine/metabolic	brown	2471	76271	1.87e-200	5.83649	6.215	5.458	TRUE	276.4	199.729	income_SES_subset	YES	9
276.41	Acidosis	3	endocrine/metabolic	brown	2163	76271	5.63e-183	6.07595	6.489	5.663	TRUE	276.41	182.249	income_SES_subset	YES	9
276.5	Hypovolemia	3	endocrine/metabolic	brown	4530	76271	1.09e-231	4.02584	4.269	3.783	TRUE	276.5	230.962	income_SES_subset	YES	9
276.6	Fluid overload	3	endocrine/metabolic	brown	1143	76271	6.62e-60	3.83371	4.294	3.373	TRUE	276.6	59.1792	income_SES_subset	YES	9
278	Overweight, obesity and other hyperalimentation	3	endocrine/metabolic	brown	31277	63543	1e-300	2.19704	2.282	2.112	TRUE	278	300	income_SES_subset	YES	9
278.1	Obesity	3	endocrine/metabolic	brown	31010	63543	1e-300	2.22763	2.313	2.142	TRUE	278.1	300	income_SES_subset	YES	9
278.11	Morbid obesity	3	endocrine/metabolic	brown	13494	63543	1e-300	3.05538	3.186	2.925	TRUE	278.11	300	income_SES_subset	YES	9
401	Hypertension	8	circulatory system	red	49997	46678	1e-300	2.54797	2.629	2.467	TRUE	401	300	income_SES_subset	YES	9
401.1	Essential hypertension	8	circulatory system	red	49444	46678	1e-300	2.54558	2.627	2.464	TRUE	401.1	300	income_SES_subset	YES	9
401.2	Hypertensive heart and/or renal disease	8	circulatory system	red	8052	46678	1e-300	4.8201	5.022	4.618	TRUE	401.2	300	income_SES_subset	YES	9
401.21	Hypertensive heart disease	8	circulatory system	red	3472	46678	6.01e-249	5.09149	5.388	4.795	TRUE	401.21	248.221	income_SES_subset	YES	9
401.22	Hypertensive chronic kidney disease	8	circulatory system	red	4792	46678	1.3e-302	4.77105	5.023	4.52	TRUE	401.22	301.886	income_SES_subset	YES	9
411	Ischemic Heart Disease	8	circulatory system	red	15760	79327	7.18e-143	1.40163	1.51	1.294	TRUE	411	142.144	income_SES_subset	YES	9
411.2	Myocardial infarction	8	circulatory system	red	4484	79327	4.9e-135	2.63522	2.844	2.426	TRUE	411.2	134.31	income_SES_subset	YES	9
411.4	Coronary atherosclerosis	8	circulatory system	red	12979	79327	2.22e-94	1.21873	1.335	1.103	TRUE	411.4	93.6535	income_SES_subset	YES	9
414	Other forms of chronic heart disease	8	circulatory system	red	2264	79327	1.01e-14	0.97358	1.22	0.727	TRUE	414	13.9936	income_SES_subset	YES	9
415	Pulmonary heart disease	8	circulatory system	red	3782	91269	6.26e-49	1.53819	1.743	1.333	TRUE	415	48.2035	income_SES_subset	YES	9
415.2	Chronic pulmonary heart disease	8	circulatory system	red	1468	91269	8.48e-37	2.2874	2.641	1.934	TRUE	415.2	36.0717	income_SES_subset	YES	9
416	Cardiomegaly	8	circulatory system	red	3344	91269	4.21e-22	1.00875	1.213	0.804	TRUE	416	21.3754	income_SES_subset	YES	9
418	Nonspecific chest pain	8	circulatory system	red	28602	59440	1e-300	1.90144	1.992	1.811	TRUE	418	300	income_SES_subset	YES	9
428	Congestive heart failure; nonhypertensive	8	circulatory system	red	7063	82566	5.15e-256	3.10587	3.284	2.928	TRUE	428	255.288	income_SES_subset	YES	9
428.1	Congestive heart failure (CHF) NOS	8	circulatory system	red	4712	82566	2.95e-201	3.44935	3.673	3.226	TRUE	428.1	200.531	income_SES_subset	YES	9
428.3	Heart failure with reduced EF [Systolic or combined heart failure]	8	circulatory system	red	3329	82566	6.4e-146	3.43141	3.693	3.17	TRUE	428.3	145.194	income_SES_subset	YES	9
428.4	Heart failure with preserved EF [Diastolic heart failure]	8	circulatory system	red	3205	82566	4.14e-122	3.15041	3.413	2.888	TRUE	428.4	121.383	income_SES_subset	YES	9
433	Cerebrovascular disease	8	circulatory system	red	8721	89116	8.28e-88	1.36553	1.5	1.231	TRUE	433	87.0817	income_SES_subset	YES	9
433.2	Occlusion of cerebral arteries	8	circulatory system	red	3253	89116	4.03e-85	2.34769	2.583	2.112	TRUE	433.2	84.3949	income_SES_subset	YES	9
433.21	Cerebral artery occlusion, with cerebral infarction	8	circulatory system	red	3119	89116	5.89e-81	2.32839	2.568	2.089	TRUE	433.21	80.23	income_SES_subset	YES	9
433.8	Late effects of cerebrovascular disease	8	circulatory system	red	1376	89116	3.43e-76	4.04189	4.471	3.613	TRUE	433.8	75.4645	income_SES_subset	YES	9
443.7	Peripheral angiopathy in diseases classified elsewhere	8	circulatory system	red	1151	82869	2.81e-73	4.62786	5.129	4.127	TRUE	443.7	72.5513	income_SES_subset	YES	9
452	Other venous embolism and thrombosis	8	circulatory system	red	4264	66102	2.36e-29	1.09978	1.291	0.908	TRUE	452	28.6265	income_SES_subset	YES	9
452.2	Deep vein thrombosis [DVT]	8	circulatory system	red	3320	66102	1.93e-28	1.22121	1.438	1.005	TRUE	452.2	27.7149	income_SES_subset	YES	9
456	Chronic venous insufficiency [CVI]	8	circulatory system	red	3648	66102	6.93e-37	1.37385	1.586	1.162	TRUE	456	36.1596	income_SES_subset	YES	9
496	Chronic airway obstruction	9	respiratory	coral4	8823	66544	1e-300	4.18369	4.361	4.007	TRUE	496	300	income_SES_subset	YES	9
496.2	Chronic bronchitis	9	respiratory	coral4	3116	66544	7.69e-266	6.17619	6.524	5.829	TRUE	496.2	265.114	income_SES_subset	YES	9
496.21	Obstructive chronic bronchitis	9	respiratory	coral4	2233	66544	6.54e-235	7.76714	8.232	7.302	TRUE	496.21	234.184	income_SES_subset	YES	9
509	Respiratory failure, insufficiency, arrest	9	respiratory	coral4	4020	84345	9.05e-220	4.21052	4.471	3.95	TRUE	509	219.043	income_SES_subset	YES	9
509.1	Respiratory failure	9	respiratory	coral4	3221	84345	1.44e-195	4.54512	4.844	4.247	TRUE	509.1	194.841	income_SES_subset	YES	9
509.8	Dependence on respirator [Ventilator] or supplemental oxygen	9	respiratory	coral4	1196	84345	1.28e-89	5.38431	5.91	4.859	TRUE	509.8	88.8928	income_SES_subset	YES	9
512	Other symptoms of respiratory system	9	respiratory	coral4	43227	43654	3.87e-212	1.30091	1.383	1.219	TRUE	512	211.412	income_SES_subset	YES	9
512.7	Shortness of breath	9	respiratory	coral4	21049	43654	3.06e-308	2.16937	2.283	2.056	TRUE	512.7	307.515	income_SES_subset	YES	9
512.8	Cough	9	respiratory	coral4	21407	43654	8.15e-109	1.20978	1.317	1.103	TRUE	512.8	108.089	income_SES_subset	YES	9
512.9	Other dyspnea	9	respiratory	coral4	20098	43654	1.5e-123	1.31105	1.42	1.202	TRUE	512.9	122.824	income_SES_subset	YES	9
580	Nephritis; nephrosis; renal sclerosis	11	genitourinary	black	1834	75131	2.56e-58	2.70859	3.038	2.379	TRUE	580	57.5919	income_SES_subset	YES	9
585	Renal failure	11	genitourinary	black	12013	75131	1e-300	2.82757	2.963	2.692	TRUE	585	300	income_SES_subset	YES	9
585.1	Acute renal failure	11	genitourinary	black	6676	75131	1e-300	3.86263	4.06	3.665	TRUE	585.1	300	income_SES_subset	YES	9
585.3	Chronic renal failure [CKD]	11	genitourinary	black	7694	75131	1.84e-231	2.74169	2.907	2.576	TRUE	585.3	230.735	income_SES_subset	YES	9
585.31	Renal dialysis	11	genitourinary	black	587	75131	5.13e-42	5.24009	5.996	4.484	TRUE	585.31	41.2896	income_SES_subset	YES	9
585.32	End stage renal disease	11	genitourinary	black	1463	75131	2.14e-90	4.46844	4.903	4.034	TRUE	585.32	89.6686	income_SES_subset	YES	9
585.33	Chronic Kidney Disease, Stage III	11	genitourinary	black	4300	75131	3.13e-95	2.19021	2.398	1.983	TRUE	585.33	94.5049	income_SES_subset	YES	9
585.34	Chronic Kidney Disease, Stage IV	11	genitourinary	black	1574	75131	4.88e-72	3.47998	3.86	3.1	TRUE	585.34	71.3112	income_SES_subset	YES	9
585.4	Chronic kidney disease, Stage I or II	11	genitourinary	black	2315	75131	1.21e-46	1.96546	2.234	1.697	TRUE	585.4	45.9171	income_SES_subset	YES	9
586	Other disorders of the kidney and ureters	11	genitourinary	black	8936	75131	8.55e-45	0.929471	1.059	0.8	TRUE	586	44.0682	income_SES_subset	YES	9
586.2	Cyst of kidney, acquired	11	genitourinary	black	3132	75131	7.8e-22	1.02628	1.236	0.817	TRUE	586.2	21.1082	income_SES_subset	YES	9
588	Disorders resulting from impaired renal function	11	genitourinary	black	1499	75131	1.03e-63	3.30022	3.684	2.916	TRUE	588	62.9868	income_SES_subset	YES	9
588.2	Secondary hyperparathyroidism (of renal origin)	11	genitourinary	black	1264	75131	5.58e-55	3.32962	3.747	2.912	TRUE	588.2	54.253	income_SES_subset	YES	9
591	Urinary tract infection	11	genitourinary	black	14156	66903	2.03e-121	1.39655	1.513	1.28	TRUE	591	120.693	income_SES_subset	YES	9
596	Other disorders of bladder	11	genitourinary	black	4746	90423	3.35e-25	0.912588	1.085	0.74	TRUE	596	24.4756	income_SES_subset	YES	9
216	Benign neoplasm of skin	2	neoplasms	darkcyan	15712	75434	1e-300	-5.4675	-5.272	-5.663	TRUE	216	300	education_SES_subset	YES	9
228	Hemangioma and lymphangioma, any site	2	neoplasms	darkcyan	5642	91586	2.17e-264	-4.44031	-4.19	-4.691	TRUE	228	263.663	education_SES_subset	YES	9
228.1	Hemangioma of skin and subcutaneous tissue	2	neoplasms	darkcyan	4556	91586	2.76e-265	-4.77058	-4.502	-5.039	TRUE	228.1	264.56	education_SES_subset	YES	9
249	Secondary diabetes mellitus	3	endocrine/metabolic	brown	1649	61523	3.42e-66	8.38818	9.345	7.432	TRUE	249	65.4655	education_SES_subset	YES	9
250	Diabetes mellitus	3	endocrine/metabolic	brown	21482	61523	1e-300	5.85877	6.11	5.608	TRUE	250	300	education_SES_subset	YES	9
250.1	Type 1 diabetes	3	endocrine/metabolic	brown	2319	61523	1.5e-53	5.6246	6.34	4.909	TRUE	250.1	52.8246	education_SES_subset	YES	9
250.2	Type 2 diabetes	3	endocrine/metabolic	brown	21182	61523	1e-300	5.96981	6.224	5.716	TRUE	250.2	300	education_SES_subset	YES	9
250.22	Type 2 diabetes with renal manifestations	3	endocrine/metabolic	brown	4311	61523	1.03e-189	9.02732	9.63	8.425	TRUE	250.22	188.986	education_SES_subset	YES	9
250.23	Type 2 diabetes with ophthalmic manifestations	3	endocrine/metabolic	brown	2223	61523	9.74e-102	9.00949	9.834	8.185	TRUE	250.23	101.011	education_SES_subset	YES	9
250.24	Type 2 diabetes with neurological manifestations	3	endocrine/metabolic	brown	5783	61523	1.19e-273	9.96573	10.518	9.413	TRUE	250.24	272.924	education_SES_subset	YES	9
250.25	Diabetes type 2 with peripheral circulatory disorders	3	endocrine/metabolic	brown	2123	61523	7.28e-90	8.36762	9.184	7.552	TRUE	250.25	89.1378	education_SES_subset	YES	9
250.42	Other abnormal glucose	3	endocrine/metabolic	brown	12236	61523	7.74e-19	1.12158	1.37	0.874	TRUE	250.42	18.1115	education_SES_subset	YES	9
250.6	Polyneuropathy in diabetes	3	endocrine/metabolic	brown	3592	61523	1.47e-173	9.81881	10.504	9.134	TRUE	250.6	172.832	education_SES_subset	YES	9
260	Protein-calorie malnutrition	3	endocrine/metabolic	brown	2156	64601	3.35e-73	7.4796	8.29	6.67	TRUE	260	72.4754	education_SES_subset	YES	9
271	Disorders of carbohydrate transport and metabolism	3	endocrine/metabolic	brown	8110	90520	5.55e-07	0.713492	0.993	0.434	TRUE	271	6.25601	education_SES_subset	YES	9
271.3	Intestinal disaccharidase deficiencies and disaccharide malabsorption	3	endocrine/metabolic	brown	7966	90520	1.4e-06	0.692089	0.973	0.411	TRUE	271.3	5.85332	education_SES_subset	YES	9
275	Disorders of mineral metabolism	3	endocrine/metabolic	brown	7051	90703	1.39e-35	2.13299	2.469	1.797	TRUE	275	34.8566	education_SES_subset	YES	9
275.3	Disorders of magnesium metabolism	3	endocrine/metabolic	brown	2500	90703	1.64e-76	6.87058	7.598	6.143	TRUE	275.3	75.7854	education_SES_subset	YES	9
275.5	Disorders of calcium/phosphorus metabolism	3	endocrine/metabolic	brown	2312	90703	1.75e-19	2.79145	3.397	2.185	TRUE	275.5	18.7577	education_SES_subset	YES	9
275.53	Disorders of phosphorus metabolism	3	endocrine/metabolic	brown	1023	90703	2.55e-27	6.12144	7.23	5.013	TRUE	275.53	26.5933	education_SES_subset	YES	9
276	Disorders of fluid, electrolyte, and acid-base balance	3	endocrine/metabolic	brown	15251	76271	1.34e-245	4.68256	4.957	4.408	TRUE	276	244.874	education_SES_subset	YES	9
276.1	Electrolyte imbalance	3	endocrine/metabolic	brown	12172	76271	2.86e-186	4.41639	4.714	4.119	TRUE	276.1	185.544	education_SES_subset	YES	9
276.12	Hyposmolality and/or hyponatremia	3	endocrine/metabolic	brown	3778	76271	1.12e-55	3.97512	4.471	3.479	TRUE	276.12	54.9497	education_SES_subset	YES	9
276.13	Hyperpotassemia	3	endocrine/metabolic	brown	3268	76271	2.91e-77	5.53727	6.121	4.954	TRUE	276.13	76.5354	education_SES_subset	YES	9
276.4	Acid-base balance disorder	3	endocrine/metabolic	brown	2471	76271	4.82e-161	12.6771	13.596	11.758	TRUE	276.4	160.317	education_SES_subset	YES	9
276.41	Acidosis	3	endocrine/metabolic	brown	2163	76271	4.27e-149	13.3446	14.35	12.339	TRUE	276.41	148.369	education_SES_subset	YES	9
276.5	Hypovolemia	3	endocrine/metabolic	brown	4530	76271	7.67e-175	8.4675	9.056	7.879	TRUE	276.5	174.115	education_SES_subset	YES	9
276.6	Fluid overload	3	endocrine/metabolic	brown	1143	76271	1.52e-49	8.62793	9.771	7.485	TRUE	276.6	48.8177	education_SES_subset	YES	9
278	Overweight, obesity and other hyperalimentation	3	endocrine/metabolic	brown	31277	63543	1e-300	3.77663	3.97	3.584	TRUE	278	300	education_SES_subset	YES	9
278.1	Obesity	3	endocrine/metabolic	brown	31010	63543	1e-300	3.83306	4.027	3.639	TRUE	278.1	300	education_SES_subset	YES	9
278.11	Morbid obesity	3	endocrine/metabolic	brown	13494	63543	1.02e-296	5.74782	6.054	5.442	TRUE	278.11	295.99	education_SES_subset	YES	9
401	Hypertension	8	circulatory system	red	49997	46678	1e-300	4.45277	4.633	4.272	TRUE	401	300	education_SES_subset	YES	9
401.1	Essential hypertension	8	circulatory system	red	49444	46678	1e-300	4.45384	4.635	4.272	TRUE	401.1	300	education_SES_subset	YES	9
401.2	Hypertensive heart and/or renal disease	8	circulatory system	red	8052	46678	1e-300	9.48526	9.957	9.014	TRUE	401.2	300	education_SES_subset	YES	9
401.21	Hypertensive heart disease	8	circulatory system	red	3472	46678	4.21e-182	10.2038	10.899	9.509	TRUE	401.21	181.376	education_SES_subset	YES	9
401.22	Hypertensive chronic kidney disease	8	circulatory system	red	4792	46678	3.74e-216	9.40235	9.99	8.815	TRUE	401.22	215.427	education_SES_subset	YES	9
411	Ischemic Heart Disease	8	circulatory system	red	15760	79327	7.47e-115	2.8941	3.143	2.645	TRUE	411	114.127	education_SES_subset	YES	9
411.2	Myocardial infarction	8	circulatory system	red	4484	79327	4.58e-113	5.79517	6.298	5.293	TRUE	411.2	112.339	education_SES_subset	YES	9
411.4	Coronary atherosclerosis	8	circulatory system	red	12979	79327	2.08e-73	2.44572	2.71	2.181	TRUE	411.4	72.6811	education_SES_subset	YES	9
414	Other forms of chronic heart disease	8	circulatory system	red	2264	79327	2.98e-09	1.67357	2.226	1.121	TRUE	414	8.52547	education_SES_subset	YES	9
415	Pulmonary heart disease	8	circulatory system	red	3782	91269	3.21e-34	2.9703	3.448	2.493	TRUE	415	33.4935	education_SES_subset	YES	9
415.2	Chronic pulmonary heart disease	8	circulatory system	red	1468	91269	8.7e-28	4.65408	5.489	3.819	TRUE	415.2	27.0605	education_SES_subset	YES	9
416	Cardiomegaly	8	circulatory system	red	3344	91269	1.37e-13	1.76302	2.23	1.296	TRUE	416	12.8622	education_SES_subset	YES	9
418	Nonspecific chest pain	8	circulatory system	red	28602	59440	9.59e-264	3.68816	3.897	3.48	TRUE	418	263.018	education_SES_subset	YES	9
428	Congestive heart failure; nonhypertensive	8	circulatory system	red	7063	82566	1.81e-189	6.29475	6.715	5.875	TRUE	428	188.743	education_SES_subset	YES	9
428.1	Congestive heart failure (CHF) NOS	8	circulatory system	red	4712	82566	8.92e-156	7.22037	7.753	6.688	TRUE	428.1	155.05	education_SES_subset	YES	9
428.3	Heart failure with reduced EF [Systolic or combined heart failure]	8	circulatory system	red	3329	82566	9.35e-113	7.21649	7.843	6.59	TRUE	428.3	112.029	education_SES_subset	YES	9
428.4	Heart failure with preserved EF [Diastolic heart failure]	8	circulatory system	red	3205	82566	2.25e-94	6.52932	7.15	5.908	TRUE	428.4	93.6481	education_SES_subset	YES	9
433	Cerebrovascular disease	8	circulatory system	red	8721	89116	4.33e-66	2.72048	3.031	2.41	TRUE	433	65.3637	education_SES_subset	YES	9
433.2	Occlusion of cerebral arteries	8	circulatory system	red	3253	89116	2.13e-68	4.99372	5.554	4.434	TRUE	433.2	67.6716	education_SES_subset	YES	9
433.21	Cerebral artery occlusion, with cerebral infarction	8	circulatory system	red	3119	89116	3.11e-64	4.90669	5.475	4.338	TRUE	433.21	63.5073	education_SES_subset	YES	9
433.8	Late effects of cerebrovascular disease	8	circulatory system	red	1376	89116	1.7e-61	8.64484	9.669	7.621	TRUE	433.8	60.7684	education_SES_subset	YES	9
443.7	Peripheral angiopathy in diseases classified elsewhere	8	circulatory system	red	1151	82869	1.91e-55	9.30352	10.466	8.141	TRUE	443.7	54.7188	education_SES_subset	YES	9
452	Other venous embolism and thrombosis	8	circulatory system	red	4264	66102	2.86e-20	2.09563	2.541	1.65	TRUE	452	19.5439	education_SES_subset	YES	9
452.2	Deep vein thrombosis [DVT]	8	circulatory system	red	3320	66102	6.49e-19	2.27711	2.78	1.775	TRUE	452.2	18.1877	education_SES_subset	YES	9
456	Chronic venous insufficiency [CVI]	8	circulatory system	red	3648	66102	7.24e-23	2.44403	2.931	1.957	TRUE	456	22.1405	education_SES_subset	YES	9
496	Chronic airway obstruction	9	respiratory	coral4	8823	66544	1e-300	8.0764	8.483	7.67	TRUE	496	300	education_SES_subset	YES	9
496.2	Chronic bronchitis	9	respiratory	coral4	3116	66544	2.95e-208	12.5464	13.345	11.748	TRUE	496.2	207.53	education_SES_subset	YES	9
496.21	Obstructive chronic bronchitis	9	respiratory	coral4	2233	66544	8.74e-195	16.1867	17.252	15.121	TRUE	496.21	194.058	education_SES_subset	YES	9
509	Respiratory failure, insufficiency, arrest	9	respiratory	coral4	4020	84345	2.53e-174	8.93551	9.558	8.313	TRUE	509	173.597	education_SES_subset	YES	9
509.1	Respiratory failure	9	respiratory	coral4	3221	84345	4.29e-153	9.48762	10.193	8.782	TRUE	509.1	152.367	education_SES_subset	YES	9
509.8	Dependence on respirator [Ventilator] or supplemental oxygen	9	respiratory	coral4	1196	84345	6.29e-71	11.0378	12.253	9.823	TRUE	509.8	70.2012	education_SES_subset	YES	9
512	Other symptoms of respiratory system	9	respiratory	coral4	43227	43654	1.88e-127	2.21204	2.393	2.032	TRUE	512	126.726	education_SES_subset	YES	9
512.7	Shortness of breath	9	respiratory	coral4	21049	43654	7.94e-207	4.04997	4.309	3.791	TRUE	512.7	206.1	education_SES_subset	YES	9
512.8	Cough	9	respiratory	coral4	21407	43654	1.34e-65	2.08316	2.322	1.844	TRUE	512.8	64.8738	education_SES_subset	YES	9
512.9	Other dyspnea	9	respiratory	coral4	20098	43654	1.04e-68	2.16395	2.406	1.922	TRUE	512.9	67.9847	education_SES_subset	YES	9
580	Nephritis; nephrosis; renal sclerosis	11	genitourinary	black	1834	75131	4.04e-46	5.83866	6.641	5.036	TRUE	580	45.3932	education_SES_subset	YES	9
585	Renal failure	11	genitourinary	black	12013	75131	3.05e-257	5.59238	5.912	5.272	TRUE	585	256.515	education_SES_subset	YES	9
585.1	Acute renal failure	11	genitourinary	black	6676	75131	2.73e-253	8.29209	8.77	7.814	TRUE	585.1	252.564	education_SES_subset	YES	9
585.3	Chronic renal failure [CKD]	11	genitourinary	black	7694	75131	6.55e-159	5.27035	5.655	4.886	TRUE	585.3	158.184	education_SES_subset	YES	9
585.31	Renal dialysis	11	genitourinary	black	587	75131	6.33e-36	12.0032	13.883	10.123	TRUE	585.31	35.1983	education_SES_subset	YES	9
585.32	End stage renal disease	11	genitourinary	black	1463	75131	1.7e-72	9.75525	10.817	8.693	TRUE	585.32	71.7705	education_SES_subset	YES	9
585.33	Chronic Kidney Disease, Stage III	11	genitourinary	black	4300	75131	7.98e-66	4.2125	4.694	3.731	TRUE	585.33	65.098	education_SES_subset	YES	9
585.34	Chronic Kidney Disease, Stage IV	11	genitourinary	black	1574	75131	4.17e-57	7.42742	8.341	6.513	TRUE	585.34	56.3797	education_SES_subset	YES	9
585.4	Chronic kidney disease, Stage I or II	11	genitourinary	black	2315	75131	2.2e-38	4.28529	4.934	3.637	TRUE	585.4	37.6574	education_SES_subset	YES	9
586	Other disorders of the kidney and ureters	11	genitourinary	black	8936	75131	1.16e-32	1.80123	2.098	1.505	TRUE	586	31.9358	education_SES_subset	YES	9
586.2	Cyst of kidney, acquired	11	genitourinary	black	3132	75131	1.72e-15	1.94623	2.425	1.467	TRUE	586.2	14.7644	education_SES_subset	YES	9
588	Disorders resulting from impaired renal function	11	genitourinary	black	1499	75131	3.31e-43	6.28033	7.174	5.387	TRUE	588	42.4799	education_SES_subset	YES	9
588.2	Secondary hyperparathyroidism (of renal origin)	11	genitourinary	black	1264	75131	5.8e-36	6.14924	7.112	5.187	TRUE	588.2	35.2365	education_SES_subset	YES	9
591	Urinary tract infection	11	genitourinary	black	14156	66903	3.43e-93	2.81708	3.087	2.547	TRUE	591	92.4645	education_SES_subset	YES	9
596	Other disorders of bladder	11	genitourinary	black	4746	90423	6.58e-16	1.61002	2.001	1.219	TRUE	596	15.1817	education_SES_subset	YES	9
216	Benign neoplasm of skin	2	neoplasms	darkcyan	15712	75434	2.26e-141	-1.50112	-1.617	-1.385	TRUE	216	140.647	median_income_SES_subset	YES	9
228	Hemangioma and lymphangioma, any site	2	neoplasms	darkcyan	5642	91586	3.93e-23	-0.870687	-1.043	-0.698	TRUE	228	22.4053	median_income_SES_subset	YES	9
228.1	Hemangioma of skin and subcutaneous tissue	2	neoplasms	darkcyan	4556	91586	7.74e-24	-0.965211	-1.153	-0.777	TRUE	228.1	23.1111	median_income_SES_subset	YES	9
249	Secondary diabetes mellitus	3	endocrine/metabolic	brown	1649	61523	6.35e-23	1.93639	1.551	2.321	TRUE	249	22.197	median_income_SES_subset	YES	9
250	Diabetes mellitus	3	endocrine/metabolic	brown	21482	61523	1.18e-220	2.06546	1.938	2.193	TRUE	250	219.927	median_income_SES_subset	YES	9
250.1	Type 1 diabetes	3	endocrine/metabolic	brown	2319	61523	1.59e-25	1.73896	1.413	2.065	TRUE	250.1	24.7988	median_income_SES_subset	YES	9
250.2	Type 2 diabetes	3	endocrine/metabolic	brown	21182	61523	4.57e-226	2.11081	1.982	2.24	TRUE	250.2	225.34	median_income_SES_subset	YES	9
250.22	Type 2 diabetes with renal manifestations	3	endocrine/metabolic	brown	4311	61523	1.45e-77	2.44417	2.187	2.701	TRUE	250.22	76.8401	median_income_SES_subset	YES	9
250.23	Type 2 diabetes with ophthalmic manifestations	3	endocrine/metabolic	brown	2223	61523	3.64e-46	2.55079	2.2	2.901	TRUE	250.23	45.4392	median_income_SES_subset	YES	9
250.24	Type 2 diabetes with neurological manifestations	3	endocrine/metabolic	brown	5783	61523	8.76e-120	2.75893	2.527	2.991	TRUE	250.24	119.057	median_income_SES_subset	YES	9
250.25	Diabetes type 2 with peripheral circulatory disorders	3	endocrine/metabolic	brown	2123	61523	1.95e-48	2.65686	2.301	3.013	TRUE	250.25	47.7108	median_income_SES_subset	YES	9
250.42	Other abnormal glucose	3	endocrine/metabolic	brown	12236	61523	1.34e-50	1.12907	0.981	1.277	TRUE	250.42	49.8722	median_income_SES_subset	YES	9
250.6	Polyneuropathy in diabetes	3	endocrine/metabolic	brown	3592	61523	6.82e-79	2.75347	2.466	3.04	TRUE	250.6	78.1663	median_income_SES_subset	YES	9
260	Protein-calorie malnutrition	3	endocrine/metabolic	brown	2156	64601	1.24e-10	1.04257	0.725	1.36	TRUE	260	9.90757	median_income_SES_subset	YES	9
271	Disorders of carbohydrate transport and metabolism	3	endocrine/metabolic	brown	8110	90520	5.24e-88	1.84602	1.664	2.028	TRUE	271	87.2807	median_income_SES_subset	YES	9
271.3	Intestinal disaccharidase deficiencies and disaccharide malabsorption	3	endocrine/metabolic	brown	7966	90520	1.56e-89	1.88415	1.7	2.068	TRUE	271.3	88.8057	median_income_SES_subset	YES	9
275	Disorders of mineral metabolism	3	endocrine/metabolic	brown	7051	90703	5.07e-44	1.31682	1.131	1.502	TRUE	275	43.2946	median_income_SES_subset	YES	9
275.3	Disorders of magnesium metabolism	3	endocrine/metabolic	brown	2500	90703	1.8e-65	3.01232	2.667	3.358	TRUE	275.3	64.7445	median_income_SES_subset	YES	9
275.5	Disorders of calcium/phosphorus metabolism	3	endocrine/metabolic	brown	2312	90703	6.24e-10	0.95976	0.656	1.264	TRUE	275.5	9.20495	median_income_SES_subset	YES	9
275.53	Disorders of phosphorus metabolism	3	endocrine/metabolic	brown	1023	90703	5.81e-09	1.40321	0.931	1.876	TRUE	275.53	8.23582	median_income_SES_subset	YES	9
276	Disorders of fluid, electrolyte, and acid-base balance	3	endocrine/metabolic	brown	15251	76271	1.6e-108	1.56566	1.427	1.704	TRUE	276	107.795	median_income_SES_subset	YES	9
276.1	Electrolyte imbalance	3	endocrine/metabolic	brown	12172	76271	6.8e-85	1.50627	1.355	1.657	TRUE	276.1	84.1676	median_income_SES_subset	YES	9
276.12	Hyposmolality and/or hyponatremia	3	endocrine/metabolic	brown	3778	76271	2.64e-15	0.975329	0.734	1.217	TRUE	276.12	14.578	median_income_SES_subset	YES	9
276.13	Hyperpotassemia	3	endocrine/metabolic	brown	3268	76271	4.04e-09	0.763314	0.509	1.018	TRUE	276.13	8.3932	median_income_SES_subset	YES	9
276.4	Acid-base balance disorder	3	endocrine/metabolic	brown	2471	76271	4.58e-47	2.48909	2.151	2.828	TRUE	276.4	46.3392	median_income_SES_subset	YES	9
276.41	Acidosis	3	endocrine/metabolic	brown	2163	76271	6.56e-40	2.42302	2.064	2.782	TRUE	276.41	39.183	median_income_SES_subset	YES	9
276.5	Hypovolemia	3	endocrine/metabolic	brown	4530	76271	1.19e-56	1.99401	1.748	2.24	TRUE	276.5	55.9228	median_income_SES_subset	YES	9
276.6	Fluid overload	3	endocrine/metabolic	brown	1143	76271	3.19e-08	1.24272	0.802	1.683	TRUE	276.6	7.4966	median_income_SES_subset	YES	9
278	Overweight, obesity and other hyperalimentation	3	endocrine/metabolic	brown	31277	63543	2.9e-184	1.56181	1.456	1.668	TRUE	278	183.538	median_income_SES_subset	YES	9
278.1	Obesity	3	endocrine/metabolic	brown	31010	63543	1.98e-185	1.57228	1.466	1.678	TRUE	278.1	184.704	median_income_SES_subset	YES	9
278.11	Morbid obesity	3	endocrine/metabolic	brown	13494	63543	6.69e-141	1.94907	1.798	2.1	TRUE	278.11	140.175	median_income_SES_subset	YES	9
401	Hypertension	8	circulatory system	red	49997	46678	1.22e-275	1.93896	1.832	2.046	TRUE	401	274.913	median_income_SES_subset	YES	9
401.1	Essential hypertension	8	circulatory system	red	49444	46678	1.14e-272	1.93483	1.827	2.042	TRUE	401.1	271.942	median_income_SES_subset	YES	9
401.2	Hypertensive heart and/or renal disease	8	circulatory system	red	8052	46678	3.04e-147	2.96229	2.738	3.187	TRUE	401.2	146.517	median_income_SES_subset	YES	9
401.21	Hypertensive heart disease	8	circulatory system	red	3472	46678	1.47e-87	3.30407	2.978	3.631	TRUE	401.21	86.8322	median_income_SES_subset	YES	9
401.22	Hypertensive chronic kidney disease	8	circulatory system	red	4792	46678	9.02e-85	2.70969	2.437	2.982	TRUE	401.22	84.0449	median_income_SES_subset	YES	9
411	Ischemic Heart Disease	8	circulatory system	red	15760	79327	1.59e-30	0.785946	0.652	0.92	TRUE	411	29.7981	median_income_SES_subset	YES	9
411.2	Myocardial infarction	8	circulatory system	red	4484	79327	4.96e-23	1.15291	0.924	1.382	TRUE	411.2	22.3044	median_income_SES_subset	YES	9
411.4	Coronary atherosclerosis	8	circulatory system	red	12979	79327	8.3e-34	0.905352	0.759	1.052	TRUE	411.4	33.0809	median_income_SES_subset	YES	9
414	Other forms of chronic heart disease	8	circulatory system	red	2264	79327	4.55e-21	1.56679	1.241	1.893	TRUE	414	20.3416	median_income_SES_subset	YES	9
415	Pulmonary heart disease	8	circulatory system	red	3782	91269	3.77e-13	0.883041	0.645	1.121	TRUE	415	12.4233	median_income_SES_subset	YES	9
415.2	Chronic pulmonary heart disease	8	circulatory system	red	1468	91269	2.73e-08	1.07481	0.696	1.454	TRUE	415.2	7.56332	median_income_SES_subset	YES	9
416	Cardiomegaly	8	circulatory system	red	3344	91269	5.54e-15	1.01346	0.759	1.268	TRUE	416	14.2561	median_income_SES_subset	YES	9
418	Nonspecific chest pain	8	circulatory system	red	28602	59440	3.37e-73	1.04516	0.932	1.158	TRUE	418	72.4725	median_income_SES_subset	YES	9
428	Congestive heart failure; nonhypertensive	8	circulatory system	red	7063	82566	1.47e-55	1.5305	1.339	1.722	TRUE	428	54.8319	median_income_SES_subset	YES	9
428.1	Congestive heart failure (CHF) NOS	8	circulatory system	red	4712	82566	1.3e-37	1.49164	1.264	1.72	TRUE	428.1	36.8855	median_income_SES_subset	YES	9
428.3	Heart failure with reduced EF [Systolic or combined heart failure]	8	circulatory system	red	3329	82566	7.41e-25	1.38766	1.123	1.652	TRUE	428.3	24.1304	median_income_SES_subset	YES	9
428.4	Heart failure with preserved EF [Diastolic heart failure]	8	circulatory system	red	3205	82566	1.03e-22	1.34366	1.075	1.612	TRUE	428.4	21.9887	median_income_SES_subset	YES	9
433	Cerebrovascular disease	8	circulatory system	red	8721	89116	9.94e-17	0.684723	0.523	0.846	TRUE	433	16.0024	median_income_SES_subset	YES	9
433.2	Occlusion of cerebral arteries	8	circulatory system	red	3253	89116	1.01e-07	0.680963	0.43	0.932	TRUE	433.2	6.99555	median_income_SES_subset	YES	9
433.21	Cerebral artery occlusion, with cerebral infarction	8	circulatory system	red	3119	89116	1.09e-07	0.693399	0.438	0.949	TRUE	433.21	6.96228	median_income_SES_subset	YES	9
433.8	Late effects of cerebrovascular disease	8	circulatory system	red	1376	89116	3.75e-08	1.10351	0.71	1.497	TRUE	433.8	7.4265	median_income_SES_subset	YES	9
443.7	Peripheral angiopathy in diseases classified elsewhere	8	circulatory system	red	1151	82869	1.34e-13	1.6897	1.242	2.137	TRUE	443.7	12.8729	median_income_SES_subset	YES	9
452	Other venous embolism and thrombosis	8	circulatory system	red	4264	66102	1.01e-12	0.845897	0.613	1.078	TRUE	452	11.9958	median_income_SES_subset	YES	9
452.2	Deep vein thrombosis [DVT]	8	circulatory system	red	3320	66102	2.49e-14	1.02402	0.761	1.287	TRUE	452.2	13.604	median_income_SES_subset	YES	9
456	Chronic venous insufficiency [CVI]	8	circulatory system	red	3648	66102	3.72e-11	0.845232	0.595	1.096	TRUE	456	10.4296	median_income_SES_subset	YES	9
496	Chronic airway obstruction	9	respiratory	coral4	8823	66544	9.01e-123	2.21763	2.033	2.402	TRUE	496	122.045	median_income_SES_subset	YES	9
496.2	Chronic bronchitis	9	respiratory	coral4	3116	66544	1.73e-60	2.51855	2.218	2.819	TRUE	496.2	59.7608	median_income_SES_subset	YES	9
496.21	Obstructive chronic bronchitis	9	respiratory	coral4	2233	66544	2.26e-45	2.52932	2.179	2.88	TRUE	496.21	44.6459	median_income_SES_subset	YES	9
509	Respiratory failure, insufficiency, arrest	9	respiratory	coral4	4020	84345	3.03e-33	1.52678	1.278	1.776	TRUE	509	32.5191	median_income_SES_subset	YES	9
509.1	Respiratory failure	9	respiratory	coral4	3221	84345	2.49e-33	1.72532	1.444	2.006	TRUE	509.1	32.6046	median_income_SES_subset	YES	9
509.8	Dependence on respirator [Ventilator] or supplemental oxygen	9	respiratory	coral4	1196	84345	1.93e-32	2.99447	2.5	3.489	TRUE	509.8	31.7142	median_income_SES_subset	YES	9
512	Other symptoms of respiratory system	9	respiratory	coral4	43227	43654	3.44e-128	1.36206	1.251	1.473	TRUE	512	127.464	median_income_SES_subset	YES	9
512.7	Shortness of breath	9	respiratory	coral4	21049	43654	7.45e-97	1.50504	1.364	1.646	TRUE	512.7	96.1277	median_income_SES_subset	YES	9
512.8	Cough	9	respiratory	coral4	21407	43654	5.03e-73	1.32308	1.18	1.467	TRUE	512.8	72.2987	median_income_SES_subset	YES	9
512.9	Other dyspnea	9	respiratory	coral4	20098	43654	1.9e-110	1.66577	1.52	1.812	TRUE	512.9	109.72	median_income_SES_subset	YES	9
580	Nephritis; nephrosis; renal sclerosis	11	genitourinary	black	1834	75131	3.47e-08	0.970482	0.626	1.315	TRUE	580	7.46014	median_income_SES_subset	YES	9
585	Renal failure	11	genitourinary	black	12013	75131	1.88e-94	1.63487	1.479	1.79	TRUE	585	93.725	median_income_SES_subset	YES	9
585.1	Acute renal failure	11	genitourinary	black	6676	75131	6.96e-61	1.68624	1.485	1.887	TRUE	585.1	60.1571	median_income_SES_subset	YES	9
585.3	Chronic renal failure [CKD]	11	genitourinary	black	7694	75131	3.02e-72	1.7417	1.552	1.932	TRUE	585.3	71.5196	median_income_SES_subset	YES	9
585.31	Renal dialysis	11	genitourinary	black	587	75131	2.25e-10	2.11618	1.462	2.77	TRUE	585.31	9.64857	median_income_SES_subset	YES	9
585.32	End stage renal disease	11	genitourinary	black	1463	75131	6.68e-25	2.23059	1.806	2.655	TRUE	585.32	24.1753	median_income_SES_subset	YES	9
585.33	Chronic Kidney Disease, Stage III	11	genitourinary	black	4300	75131	4.82e-34	1.50023	1.259	1.742	TRUE	585.33	33.3168	median_income_SES_subset	YES	9
585.34	Chronic Kidney Disease, Stage IV	11	genitourinary	black	1574	75131	8.72e-12	1.30803	0.932	1.684	TRUE	585.34	11.0595	median_income_SES_subset	YES	9
585.4	Chronic kidney disease, Stage I or II	11	genitourinary	black	2315	75131	7.01e-12	1.07493	0.768	1.382	TRUE	585.4	11.1542	median_income_SES_subset	YES	9
586	Other disorders of the kidney and ureters	11	genitourinary	black	8936	75131	6.44e-31	0.986031	0.819	1.153	TRUE	586	30.1913	median_income_SES_subset	YES	9
586.2	Cyst of kidney, acquired	11	genitourinary	black	3132	75131	3.13e-09	0.780991	0.523	1.039	TRUE	586.2	8.50499	median_income_SES_subset	YES	9
588	Disorders resulting from impaired renal function	11	genitourinary	black	1499	75131	3.87e-19	1.83678	1.434	2.239	TRUE	588	18.4127	median_income_SES_subset	YES	9
588.2	Secondary hyperparathyroidism (of renal origin)	11	genitourinary	black	1264	75131	1.76e-19	2.0402	1.597	2.483	TRUE	588.2	18.7554	median_income_SES_subset	YES	9
591	Urinary tract infection	11	genitourinary	black	14156	66903	8.07e-24	0.737881	0.594	0.882	TRUE	591	23.0929	median_income_SES_subset	YES	9
596	Other disorders of bladder	11	genitourinary	black	4746	90423	2.29e-10	0.684531	0.473	0.896	TRUE	596	9.63978	median_income_SES_subset	YES	9
216	Benign neoplasm of skin	2	neoplasms	darkcyan	15712	75434	1.93e-58	-1.14703	-1.287	-1.008	TRUE	216	57.7146	high_school_education_SES_subset	YES	9
228	Hemangioma and lymphangioma, any site	2	neoplasms	darkcyan	5642	91586	8.1e-26	-1.16992	-1.388	-0.952	TRUE	228	25.0914	high_school_education_SES_subset	YES	9
228.1	Hemangioma of skin and subcutaneous tissue	2	neoplasms	darkcyan	4556	91586	8.72e-36	-1.58508	-1.834	-1.336	TRUE	228.1	35.0597	high_school_education_SES_subset	YES	9
249	Secondary diabetes mellitus	3	endocrine/metabolic	brown	1649	61523	2.6e-55	2.62115	2.293	2.949	TRUE	249	54.585	high_school_education_SES_subset	YES	9
250	Diabetes mellitus	3	endocrine/metabolic	brown	21482	61523	3.08e-201	1.82179	1.704	1.94	TRUE	250	200.512	high_school_education_SES_subset	YES	9
250.1	Type 1 diabetes	3	endocrine/metabolic	brown	2319	61523	8.29e-29	1.64315	1.354	1.932	TRUE	250.1	28.0814	high_school_education_SES_subset	YES	9
250.2	Type 2 diabetes	3	endocrine/metabolic	brown	21182	61523	1.46e-208	1.86693	1.748	1.986	TRUE	250.2	207.835	high_school_education_SES_subset	YES	9
250.22	Type 2 diabetes with renal manifestations	3	endocrine/metabolic	brown	4311	61523	5.86e-77	2.1111	1.888	2.334	TRUE	250.22	76.232	high_school_education_SES_subset	YES	9
250.23	Type 2 diabetes with ophthalmic manifestations	3	endocrine/metabolic	brown	2223	61523	5.87e-89	2.892	2.609	3.175	TRUE	250.23	88.2311	high_school_education_SES_subset	YES	9
250.24	Type 2 diabetes with neurological manifestations	3	endocrine/metabolic	brown	5783	61523	1.69e-64	1.74069	1.54	1.942	TRUE	250.24	63.7715	high_school_education_SES_subset	YES	9
250.25	Diabetes type 2 with peripheral circulatory disorders	3	endocrine/metabolic	brown	2123	61523	1.48e-22	1.5568	1.245	1.869	TRUE	250.25	21.8299	high_school_education_SES_subset	YES	9
250.42	Other abnormal glucose	3	endocrine/metabolic	brown	12236	61523	1.37e-20	0.70656	0.558	0.855	TRUE	250.42	19.8632	high_school_education_SES_subset	YES	9
250.6	Polyneuropathy in diabetes	3	endocrine/metabolic	brown	3592	61523	3.12e-30	1.45766	1.208	1.708	TRUE	250.6	29.5063	high_school_education_SES_subset	YES	9
260	Protein-calorie malnutrition	3	endocrine/metabolic	brown	2156	64601	4.27e-18	1.3237	1.025	1.623	TRUE	260	17.3695	high_school_education_SES_subset	YES	9
271	Disorders of carbohydrate transport and metabolism	3	endocrine/metabolic	brown	8110	90520	1.02e-40	1.07282	0.915	1.23	TRUE	271	39.9917	high_school_education_SES_subset	YES	9
271.3	Intestinal disaccharidase deficiencies and disaccharide malabsorption	3	endocrine/metabolic	brown	7966	90520	9.37e-42	1.09428	0.936	1.253	TRUE	271.3	41.0281	high_school_education_SES_subset	YES	9
275	Disorders of mineral metabolism	3	endocrine/metabolic	brown	7051	90703	4.85e-11	0.589068	0.413	0.765	TRUE	275	10.3146	high_school_education_SES_subset	YES	9
275.3	Disorders of magnesium metabolism	3	endocrine/metabolic	brown	2500	90703	1.41e-18	1.22039	0.948	1.492	TRUE	275.3	17.8505	high_school_education_SES_subset	YES	9
275.5	Disorders of calcium/phosphorus metabolism	3	endocrine/metabolic	brown	2312	90703	2.38e-07	0.762432	0.473	1.052	TRUE	275.5	6.62414	high_school_education_SES_subset	YES	9
275.53	Disorders of phosphorus metabolism	3	endocrine/metabolic	brown	1023	90703	8.26e-08	1.13954	0.723	1.556	TRUE	275.53	7.08288	high_school_education_SES_subset	YES	9
276	Disorders of fluid, electrolyte, and acid-base balance	3	endocrine/metabolic	brown	15251	76271	6.21e-18	0.582392	0.45	0.715	TRUE	276	17.207	high_school_education_SES_subset	YES	9
276.1	Electrolyte imbalance	3	endocrine/metabolic	brown	12172	76271	2.13e-13	0.544194	0.399	0.69	TRUE	276.1	12.6706	high_school_education_SES_subset	YES	9
276.12	Hyposmolality and/or hyponatremia	3	endocrine/metabolic	brown	3778	76271	3.02e-06	0.574729	0.333	0.816	TRUE	276.12	5.51961	high_school_education_SES_subset	YES	9
276.13	Hyperpotassemia	3	endocrine/metabolic	brown	3268	76271	2.77e-29	1.41554	1.169	1.662	TRUE	276.13	28.5581	high_school_education_SES_subset	YES	9
276.4	Acid-base balance disorder	3	endocrine/metabolic	brown	2471	76271	1.55e-50	2.00768	1.744	2.271	TRUE	276.4	49.8099	high_school_education_SES_subset	YES	9
276.41	Acidosis	3	endocrine/metabolic	brown	2163	76271	6.02e-44	1.98748	1.707	2.268	TRUE	276.41	43.2203	high_school_education_SES_subset	YES	9
276.5	Hypovolemia	3	endocrine/metabolic	brown	4530	76271	2.03e-18	0.965903	0.75	1.182	TRUE	276.5	17.6924	high_school_education_SES_subset	YES	9
276.6	Fluid overload	3	endocrine/metabolic	brown	1143	76271	2.12e-17	1.70757	1.313	2.102	TRUE	276.6	16.6739	high_school_education_SES_subset	YES	9
278	Overweight, obesity and other hyperalimentation	3	endocrine/metabolic	brown	31277	63543	2.27e-95	1.06251	0.962	1.163	TRUE	278	94.643	high_school_education_SES_subset	YES	9
278.1	Obesity	3	endocrine/metabolic	brown	31010	63543	4.64e-96	1.06881	0.968	1.17	TRUE	278.1	95.3337	high_school_education_SES_subset	YES	9
278.11	Morbid obesity	3	endocrine/metabolic	brown	13494	63543	8e-40	0.913935	0.778	1.05	TRUE	278.11	39.0967	high_school_education_SES_subset	YES	9
401	Hypertension	8	circulatory system	red	49997	46678	5.72e-205	1.70589	1.596	1.815	TRUE	401	204.243	high_school_education_SES_subset	YES	9
401.1	Essential hypertension	8	circulatory system	red	49444	46678	3.01e-203	1.70389	1.594	1.814	TRUE	401.1	202.521	high_school_education_SES_subset	YES	9
401.2	Hypertensive heart and/or renal disease	8	circulatory system	red	8052	46678	1.55e-150	2.65716	2.458	2.856	TRUE	401.2	149.809	high_school_education_SES_subset	YES	9
401.21	Hypertensive heart disease	8	circulatory system	red	3472	46678	3.93e-63	2.30125	2.032	2.57	TRUE	401.21	62.4051	high_school_education_SES_subset	YES	9
401.22	Hypertensive chronic kidney disease	8	circulatory system	red	4792	46678	9.65e-109	2.69006	2.452	2.928	TRUE	401.22	108.015	high_school_education_SES_subset	YES	9
411	Ischemic Heart Disease	8	circulatory system	red	15760	79327	1.13e-32	0.84457	0.706	0.984	TRUE	411	31.948	high_school_education_SES_subset	YES	9
411.2	Myocardial infarction	8	circulatory system	red	4484	79327	1.67e-10	0.735163	0.51	0.961	TRUE	411.2	9.77693	high_school_education_SES_subset	YES	9
411.4	Coronary atherosclerosis	8	circulatory system	red	12979	79327	9.46e-20	0.706434	0.554	0.859	TRUE	411.4	19.024	high_school_education_SES_subset	YES	9
414	Other forms of chronic heart disease	8	circulatory system	red	2264	79327	6.83e-06	0.704439	0.398	1.011	TRUE	414	5.16581	high_school_education_SES_subset	YES	9
415	Pulmonary heart disease	8	circulatory system	red	3782	91269	5.87e-12	0.816725	0.584	1.049	TRUE	415	11.2317	high_school_education_SES_subset	YES	9
415.2	Chronic pulmonary heart disease	8	circulatory system	red	1468	91269	2.97e-12	1.26174	0.907	1.616	TRUE	415.2	11.5266	high_school_education_SES_subset	YES	9
416	Cardiomegaly	8	circulatory system	red	3344	91269	1.19e-24	1.26139	1.02	1.503	TRUE	416	23.9243	high_school_education_SES_subset	YES	9
418	Nonspecific chest pain	8	circulatory system	red	28602	59440	1.31e-77	1.06125	0.95	1.173	TRUE	418	76.8843	high_school_education_SES_subset	YES	9
428	Congestive heart failure; nonhypertensive	8	circulatory system	red	7063	82566	8.43e-69	1.60602	1.426	1.786	TRUE	428	68.0744	high_school_education_SES_subset	YES	9
428.1	Congestive heart failure (CHF) NOS	8	circulatory system	red	4712	82566	1.37e-59	1.75078	1.54	1.962	TRUE	428.1	58.8623	high_school_education_SES_subset	YES	9
428.3	Heart failure with reduced EF [Systolic or combined heart failure]	8	circulatory system	red	3329	82566	2.13e-41	1.6823	1.438	1.927	TRUE	428.3	40.6712	high_school_education_SES_subset	YES	9
428.4	Heart failure with preserved EF [Diastolic heart failure]	8	circulatory system	red	3205	82566	2.88e-31	1.51952	1.263	1.776	TRUE	428.4	30.5407	high_school_education_SES_subset	YES	9
433	Cerebrovascular disease	8	circulatory system	red	8721	89116	4.91e-31	0.964961	0.802	1.128	TRUE	433	30.3093	high_school_education_SES_subset	YES	9
433.2	Occlusion of cerebral arteries	8	circulatory system	red	3253	89116	4.12e-29	1.38566	1.143	1.628	TRUE	433.2	28.3854	high_school_education_SES_subset	YES	9
433.21	Cerebral artery occlusion, with cerebral infarction	8	circulatory system	red	3119	89116	7.92e-27	1.35497	1.107	1.603	TRUE	433.21	26.101	high_school_education_SES_subset	YES	9
433.8	Late effects of cerebrovascular disease	8	circulatory system	red	1376	89116	2.11e-22	1.74571	1.394	2.097	TRUE	433.8	21.6749	high_school_education_SES_subset	YES	9
443.7	Peripheral angiopathy in diseases classified elsewhere	8	circulatory system	red	1151	82869	4.33e-14	1.54806	1.146	1.95	TRUE	443.7	13.3637	high_school_education_SES_subset	YES	9
452	Other venous embolism and thrombosis	8	circulatory system	red	4264	66102	7.09e-14	0.889227	0.656	1.122	TRUE	452	13.1491	high_school_education_SES_subset	YES	9
452.2	Deep vein thrombosis [DVT]	8	circulatory system	red	3320	66102	2.64e-13	0.962905	0.705	1.221	TRUE	452.2	12.5791	high_school_education_SES_subset	YES	9
456	Chronic venous insufficiency [CVI]	8	circulatory system	red	3648	66102	1.1e-14	1.00928	0.753	1.265	TRUE	456	13.9568	high_school_education_SES_subset	YES	9
496	Chronic airway obstruction	9	respiratory	coral4	8823	66544	3.07e-18	0.746443	0.578	0.914	TRUE	496	17.5128	high_school_education_SES_subset	YES	9
496.2	Chronic bronchitis	9	respiratory	coral4	3116	66544	7.86e-06	0.602091	0.338	0.866	TRUE	496.2	5.1045	high_school_education_SES_subset	YES	9
496.21	Obstructive chronic bronchitis	9	respiratory	coral4	2233	66544	1.39e-12	1.07919	0.781	1.378	TRUE	496.21	11.856	high_school_education_SES_subset	YES	9
509	Respiratory failure, insufficiency, arrest	9	respiratory	coral4	4020	84345	5.41e-41	1.51179	1.291	1.733	TRUE	509	40.2668	high_school_education_SES_subset	YES	9
509.1	Respiratory failure	9	respiratory	coral4	3221	84345	2.68e-46	1.74735	1.508	1.987	TRUE	509.1	45.572	high_school_education_SES_subset	YES	9
509.8	Dependence on respirator [Ventilator] or supplemental oxygen	9	respiratory	coral4	1196	84345	4.26e-14	1.48821	1.102	1.874	TRUE	509.8	13.371	high_school_education_SES_subset	YES	9
512	Other symptoms of respiratory system	9	respiratory	coral4	43227	43654	1.94e-34	0.683485	0.574	0.793	TRUE	512	33.7122	high_school_education_SES_subset	YES	9
512.7	Shortness of breath	9	respiratory	coral4	21049	43654	4.37e-77	1.30224	1.165	1.44	TRUE	512.7	76.3592	high_school_education_SES_subset	YES	9
512.8	Cough	9	respiratory	coral4	21407	43654	4.25e-19	0.638289	0.498	0.778	TRUE	512.8	18.3716	high_school_education_SES_subset	YES	9
512.9	Other dyspnea	9	respiratory	coral4	20098	43654	1.78e-09	0.442469	0.298	0.587	TRUE	512.9	8.74877	high_school_education_SES_subset	YES	9
580	Nephritis; nephrosis; renal sclerosis	11	genitourinary	black	1834	75131	4.2e-54	2.36945	2.07	2.669	TRUE	580	53.3764	high_school_education_SES_subset	YES	9
585	Renal failure	11	genitourinary	black	12013	75131	1.04e-112	1.67822	1.532	1.824	TRUE	585	111.983	high_school_education_SES_subset	YES	9
585.1	Acute renal failure	11	genitourinary	black	6676	75131	5.39e-89	1.84611	1.665	2.027	TRUE	585.1	88.2684	high_school_education_SES_subset	YES	9
585.3	Chronic renal failure [CKD]	11	genitourinary	black	7694	75131	5.81e-86	1.75805	1.583	1.933	TRUE	585.3	85.2362	high_school_education_SES_subset	YES	9
585.31	Renal dialysis	11	genitourinary	black	587	75131	2.74e-16	2.18135	1.659	2.704	TRUE	585.31	15.5621	high_school_education_SES_subset	YES	9
585.32	End stage renal disease	11	genitourinary	black	1463	75131	4.99e-61	2.74173	2.416	3.068	TRUE	585.32	60.3015	high_school_education_SES_subset	YES	9
585.33	Chronic Kidney Disease, Stage III	11	genitourinary	black	4300	75131	4.66e-18	1.04267	0.807	1.279	TRUE	585.33	17.3313	high_school_education_SES_subset	YES	9
585.34	Chronic Kidney Disease, Stage IV	11	genitourinary	black	1574	75131	5.8e-30	1.98146	1.64	2.323	TRUE	585.34	29.2368	high_school_education_SES_subset	YES	9
585.4	Chronic kidney disease, Stage I or II	11	genitourinary	black	2315	75131	3.11e-14	1.15674	0.858	1.455	TRUE	585.4	13.5068	high_school_education_SES_subset	YES	9
586	Other disorders of the kidney and ureters	11	genitourinary	black	8936	75131	4.41e-27	0.927096	0.758	1.096	TRUE	586	26.3556	high_school_education_SES_subset	YES	9
586.2	Cyst of kidney, acquired	11	genitourinary	black	3132	75131	3.39e-31	1.49651	1.244	1.749	TRUE	586.2	30.4702	high_school_education_SES_subset	YES	9
588	Disorders resulting from impaired renal function	11	genitourinary	black	1499	75131	8.24e-47	2.44304	2.11	2.776	TRUE	588	46.0843	high_school_education_SES_subset	YES	9
588.2	Secondary hyperparathyroidism (of renal origin)	11	genitourinary	black	1264	75131	1.38e-47	2.62628	2.271	2.981	TRUE	588.2	46.8588	high_school_education_SES_subset	YES	9
591	Urinary tract infection	11	genitourinary	black	14156	66903	3.73e-40	0.947261	0.807	1.087	TRUE	591	39.4285	high_school_education_SES_subset	YES	9
596	Other disorders of bladder	11	genitourinary	black	4746	90423	2.07e-07	0.564423	0.351	0.777	TRUE	596	6.68429	high_school_education_SES_subset	YES	9
216	Benign neoplasm of skin	2	neoplasms	darkcyan	15712	75434	2.94e-70	-1.21231	-1.346	-1.078	TRUE	216	69.5323	assited_income_SES_subset	YES	9
228	Hemangioma and lymphangioma, any site	2	neoplasms	darkcyan	5642	91586	1.75e-16	-0.85958	-1.064	-0.655	TRUE	228	15.7572	assited_income_SES_subset	YES	9
228.1	Hemangioma of skin and subcutaneous tissue	2	neoplasms	darkcyan	4556	91586	4.29e-20	-1.08479	-1.316	-0.853	TRUE	228.1	19.367	assited_income_SES_subset	YES	9
249	Secondary diabetes mellitus	3	endocrine/metabolic	brown	1649	61523	7.51e-77	2.7014	2.416	2.987	TRUE	249	76.1243	assited_income_SES_subset	YES	9
250	Diabetes mellitus	3	endocrine/metabolic	brown	21482	61523	2.37e-172	1.56017	1.451	1.669	TRUE	250	171.625	assited_income_SES_subset	YES	9
250.1	Type 1 diabetes	3	endocrine/metabolic	brown	2319	61523	7.8e-39	1.69883	1.443	1.954	TRUE	250.1	38.1081	assited_income_SES_subset	YES	9
250.2	Type 2 diabetes	3	endocrine/metabolic	brown	21182	61523	2.92e-178	1.59596	1.486	1.706	TRUE	250.2	177.534	assited_income_SES_subset	YES	9
250.22	Type 2 diabetes with renal manifestations	3	endocrine/metabolic	brown	4311	61523	1.67e-87	2.04094	1.839	2.243	TRUE	250.22	86.7775	assited_income_SES_subset	YES	9
250.23	Type 2 diabetes with ophthalmic manifestations	3	endocrine/metabolic	brown	2223	61523	3.03e-97	2.70652	2.453	2.96	TRUE	250.23	96.5187	assited_income_SES_subset	YES	9
250.24	Type 2 diabetes with neurological manifestations	3	endocrine/metabolic	brown	5783	61523	2.63e-71	1.67628	1.492	1.86	TRUE	250.24	70.5807	assited_income_SES_subset	YES	9
250.25	Diabetes type 2 with peripheral circulatory disorders	3	endocrine/metabolic	brown	2123	61523	2.32e-52	2.0682	1.802	2.334	TRUE	250.25	51.6339	assited_income_SES_subset	YES	9
250.42	Other abnormal glucose	3	endocrine/metabolic	brown	12236	61523	4.15e-33	0.845913	0.708	0.984	TRUE	250.42	32.3814	assited_income_SES_subset	YES	9
250.6	Polyneuropathy in diabetes	3	endocrine/metabolic	brown	3592	61523	1.58e-47	1.66408	1.439	1.889	TRUE	250.6	46.8002	assited_income_SES_subset	YES	9
260	Protein-calorie malnutrition	3	endocrine/metabolic	brown	2156	64601	1.44e-08	0.802244	0.525	1.08	TRUE	260	7.84165	assited_income_SES_subset	YES	9
271	Disorders of carbohydrate transport and metabolism	3	endocrine/metabolic	brown	8110	90520	3.55e-57	1.15425	1.012	1.296	TRUE	271	56.4495	assited_income_SES_subset	YES	9
271.3	Intestinal disaccharidase deficiencies and disaccharide malabsorption	3	endocrine/metabolic	brown	7966	90520	5.47e-57	1.16081	1.018	1.304	TRUE	271.3	56.2617	assited_income_SES_subset	YES	9
275	Disorders of mineral metabolism	3	endocrine/metabolic	brown	7051	90703	2.9e-30	0.921949	0.764	1.08	TRUE	275	29.537	assited_income_SES_subset	YES	9
275.3	Disorders of magnesium metabolism	3	endocrine/metabolic	brown	2500	90703	9.56e-46	1.69784	1.463	1.932	TRUE	275.3	45.0194	assited_income_SES_subset	YES	9
275.5	Disorders of calcium/phosphorus metabolism	3	endocrine/metabolic	brown	2312	90703	1.35e-11	0.910304	0.646	1.174	TRUE	275.5	10.8681	assited_income_SES_subset	YES	9
275.53	Disorders of phosphorus metabolism	3	endocrine/metabolic	brown	1023	90703	2.06e-13	1.39249	1.021	1.764	TRUE	275.53	12.6868	assited_income_SES_subset	YES	9
276	Disorders of fluid, electrolyte, and acid-base balance	3	endocrine/metabolic	brown	15251	76271	1.28e-55	0.964446	0.844	1.085	TRUE	276	54.8914	assited_income_SES_subset	YES	9
276.1	Electrolyte imbalance	3	endocrine/metabolic	brown	12172	76271	1.62e-43	0.932115	0.8	1.064	TRUE	276.1	42.7903	assited_income_SES_subset	YES	9
276.12	Hyposmolality and/or hyponatremia	3	endocrine/metabolic	brown	3778	76271	2.06e-08	0.644436	0.419	0.87	TRUE	276.12	7.68651	assited_income_SES_subset	YES	9
276.13	Hyperpotassemia	3	endocrine/metabolic	brown	3268	76271	1.47e-31	1.35845	1.131	1.586	TRUE	276.13	30.8335	assited_income_SES_subset	YES	9
276.4	Acid-base balance disorder	3	endocrine/metabolic	brown	2471	76271	6.45e-47	1.76676	1.526	2.007	TRUE	276.4	46.1908	assited_income_SES_subset	YES	9
276.41	Acidosis	3	endocrine/metabolic	brown	2163	76271	1.03e-38	1.71082	1.453	1.968	TRUE	276.41	37.9892	assited_income_SES_subset	YES	9
276.5	Hypovolemia	3	endocrine/metabolic	brown	4530	76271	7.73e-26	1.0533	0.857	1.25	TRUE	276.5	25.1116	assited_income_SES_subset	YES	9
276.6	Fluid overload	3	endocrine/metabolic	brown	1143	76271	1.91e-21	1.72747	1.371	2.083	TRUE	276.6	20.7198	assited_income_SES_subset	YES	9
278	Overweight, obesity and other hyperalimentation	3	endocrine/metabolic	brown	31277	63543	4.65e-81	0.915819	0.822	1.01	TRUE	278	80.3326	assited_income_SES_subset	YES	9
278.1	Obesity	3	endocrine/metabolic	brown	31010	63543	3.61e-82	0.923807	0.83	1.018	TRUE	278.1	81.4429	assited_income_SES_subset	YES	9
278.11	Morbid obesity	3	endocrine/metabolic	brown	13494	63543	4.64e-63	1.05629	0.933	1.18	TRUE	278.11	62.3337	assited_income_SES_subset	YES	9
401	Hypertension	8	circulatory system	red	49997	46678	1.91e-219	1.67583	1.572	1.78	TRUE	401	218.718	assited_income_SES_subset	YES	9
401.1	Essential hypertension	8	circulatory system	red	49444	46678	3.83e-217	1.6731	1.569	1.777	TRUE	401.1	216.417	assited_income_SES_subset	YES	9
401.2	Hypertensive heart and/or renal disease	8	circulatory system	red	8052	46678	7.52e-184	2.7139	2.53	2.898	TRUE	401.2	183.124	assited_income_SES_subset	YES	9
401.21	Hypertensive heart disease	8	circulatory system	red	3472	46678	2.17e-100	2.68352	2.436	2.931	TRUE	401.21	99.6628	assited_income_SES_subset	YES	9
401.22	Hypertensive chronic kidney disease	8	circulatory system	red	4792	46678	1.48e-130	2.71441	2.496	2.933	TRUE	401.22	129.831	assited_income_SES_subset	YES	9
411	Ischemic Heart Disease	8	circulatory system	red	15760	79327	1.77e-46	0.943439	0.814	1.073	TRUE	411	45.7521	assited_income_SES_subset	YES	9
411.2	Myocardial infarction	8	circulatory system	red	4484	79327	5.66e-31	1.19148	0.99	1.393	TRUE	411.2	30.2475	assited_income_SES_subset	YES	9
411.4	Coronary atherosclerosis	8	circulatory system	red	12979	79327	4.27e-31	0.84226	0.7	0.985	TRUE	411.4	30.3694	assited_income_SES_subset	YES	9
414	Other forms of chronic heart disease	8	circulatory system	red	2264	79327	1.34e-16	1.15513	0.881	1.429	TRUE	414	15.8721	assited_income_SES_subset	YES	9
415	Pulmonary heart disease	8	circulatory system	red	3782	91269	2.83e-16	0.883315	0.672	1.095	TRUE	415	15.5478	assited_income_SES_subset	YES	9
415.2	Chronic pulmonary heart disease	8	circulatory system	red	1468	91269	2.84e-18	1.38808	1.076	1.7	TRUE	415.2	17.5473	assited_income_SES_subset	YES	9
416	Cardiomegaly	8	circulatory system	red	3344	91269	2.36e-43	1.50594	1.292	1.72	TRUE	416	42.6263	assited_income_SES_subset	YES	9
418	Nonspecific chest pain	8	circulatory system	red	28602	59440	1.12e-120	1.2487	1.144	1.353	TRUE	418	119.95	assited_income_SES_subset	YES	9
428	Congestive heart failure; nonhypertensive	8	circulatory system	red	7063	82566	4.21e-87	1.63573	1.474	1.798	TRUE	428	86.3754	assited_income_SES_subset	YES	9
428.1	Congestive heart failure (CHF) NOS	8	circulatory system	red	4712	82566	1.05e-69	1.70777	1.518	1.897	TRUE	428.1	68.9787	assited_income_SES_subset	YES	9
428.3	Heart failure with reduced EF [Systolic or combined heart failure]	8	circulatory system	red	3329	82566	1.71e-54	1.74746	1.527	1.968	TRUE	428.3	53.767	assited_income_SES_subset	YES	9
428.4	Heart failure with preserved EF [Diastolic heart failure]	8	circulatory system	red	3205	82566	1.76e-45	1.65165	1.423	1.88	TRUE	428.4	44.7556	assited_income_SES_subset	YES	9
433	Cerebrovascular disease	8	circulatory system	red	8721	89116	6.14e-50	1.13202	0.983	1.281	TRUE	433	49.2121	assited_income_SES_subset	YES	9
433.2	Occlusion of cerebral arteries	8	circulatory system	red	3253	89116	2.41e-40	1.4785	1.261	1.696	TRUE	433.2	39.6181	assited_income_SES_subset	YES	9
433.21	Cerebral artery occlusion, with cerebral infarction	8	circulatory system	red	3119	89116	3.19e-38	1.46847	1.246	1.691	TRUE	433.21	37.4961	assited_income_SES_subset	YES	9
433.8	Late effects of cerebrovascular disease	8	circulatory system	red	1376	89116	3.37e-26	1.69204	1.379	2.005	TRUE	433.8	25.4718	assited_income_SES_subset	YES	9
443.7	Peripheral angiopathy in diseases classified elsewhere	8	circulatory system	red	1151	82869	1.28e-27	1.88276	1.544	2.222	TRUE	443.7	26.8939	assited_income_SES_subset	YES	9
452	Other venous embolism and thrombosis	8	circulatory system	red	4264	66102	4.93e-15	0.849822	0.637	1.063	TRUE	452	14.3071	assited_income_SES_subset	YES	9
452.2	Deep vein thrombosis [DVT]	8	circulatory system	red	3320	66102	2.19e-14	0.918974	0.683	1.155	TRUE	452.2	13.6596	assited_income_SES_subset	YES	9
456	Chronic venous insufficiency [CVI]	8	circulatory system	red	3648	66102	1.85e-22	1.13316	0.905	1.361	TRUE	456	21.7327	assited_income_SES_subset	YES	9
496	Chronic airway obstruction	9	respiratory	coral4	8823	66544	3.97e-53	1.19081	1.039	1.343	TRUE	496	52.4008	assited_income_SES_subset	YES	9
496.2	Chronic bronchitis	9	respiratory	coral4	3116	66544	1.32e-27	1.27322	1.044	1.502	TRUE	496.2	26.8804	assited_income_SES_subset	YES	9
496.21	Obstructive chronic bronchitis	9	respiratory	coral4	2233	66544	5.34e-29	1.48524	1.225	1.746	TRUE	496.21	28.2722	assited_income_SES_subset	YES	9
509	Respiratory failure, insufficiency, arrest	9	respiratory	coral4	4020	84345	1.2e-25	1.09103	0.887	1.295	TRUE	509	24.9214	assited_income_SES_subset	YES	9
509.1	Respiratory failure	9	respiratory	coral4	3221	84345	7.64e-25	1.17007	0.947	1.393	TRUE	509.1	24.1171	assited_income_SES_subset	YES	9
509.8	Dependence on respirator [Ventilator] or supplemental oxygen	9	respiratory	coral4	1196	84345	4.49e-14	1.32958	0.984	1.675	TRUE	509.8	13.3481	assited_income_SES_subset	YES	9
512	Other symptoms of respiratory system	9	respiratory	coral4	43227	43654	1.97e-73	0.968511	0.864	1.073	TRUE	512	72.7052	assited_income_SES_subset	YES	9
512.7	Shortness of breath	9	respiratory	coral4	21049	43654	2.52e-102	1.41905	1.29	1.549	TRUE	512.7	101.599	assited_income_SES_subset	YES	9
512.8	Cough	9	respiratory	coral4	21407	43654	5.74e-43	0.927421	0.795	1.06	TRUE	512.8	42.2415	assited_income_SES_subset	YES	9
512.9	Other dyspnea	9	respiratory	coral4	20098	43654	3e-43	0.951624	0.816	1.087	TRUE	512.9	42.5232	assited_income_SES_subset	YES	9
580	Nephritis; nephrosis; renal sclerosis	11	genitourinary	black	1834	75131	5.13e-47	1.9872	1.717	2.258	TRUE	580	46.2899	assited_income_SES_subset	YES	9
585	Renal failure	11	genitourinary	black	12013	75131	4.12e-134	1.67086	1.538	1.804	TRUE	585	133.385	assited_income_SES_subset	YES	9
585.1	Acute renal failure	11	genitourinary	black	6676	75131	2.37e-108	1.83916	1.676	2.002	TRUE	585.1	107.625	assited_income_SES_subset	YES	9
585.3	Chronic renal failure [CKD]	11	genitourinary	black	7694	75131	9.51e-100	1.73078	1.571	1.891	TRUE	585.3	99.0217	assited_income_SES_subset	YES	9
585.31	Renal dialysis	11	genitourinary	black	587	75131	1.07e-21	2.21201	1.759	2.665	TRUE	585.31	20.9717	assited_income_SES_subset	YES	9
585.32	End stage renal disease	11	genitourinary	black	1463	75131	3.1e-59	2.41406	2.123	2.706	TRUE	585.32	58.5081	assited_income_SES_subset	YES	9
585.33	Chronic Kidney Disease, Stage III	11	genitourinary	black	4300	75131	3.09e-36	1.37635	1.162	1.591	TRUE	585.33	35.5096	assited_income_SES_subset	YES	9
585.34	Chronic Kidney Disease, Stage IV	11	genitourinary	black	1574	75131	2.05e-37	1.98049	1.677	2.284	TRUE	585.34	36.6892	assited_income_SES_subset	YES	9
585.4	Chronic kidney disease, Stage I or II	11	genitourinary	black	2315	75131	2.11e-29	1.51514	1.251	1.779	TRUE	585.4	28.6759	assited_income_SES_subset	YES	9
586	Other disorders of the kidney and ureters	11	genitourinary	black	8936	75131	3.18e-49	1.17348	1.018	1.329	TRUE	586	48.4971	assited_income_SES_subset	YES	9
586.2	Cyst of kidney, acquired	11	genitourinary	black	3132	75131	2.64e-33	1.43033	1.197	1.663	TRUE	586.2	32.579	assited_income_SES_subset	YES	9
588	Disorders resulting from impaired renal function	11	genitourinary	black	1499	75131	3e-60	2.42573	2.135	2.716	TRUE	588	59.5234	assited_income_SES_subset	YES	9
588.2	Secondary hyperparathyroidism (of renal origin)	11	genitourinary	black	1264	75131	6.24e-63	2.62383	2.317	2.931	TRUE	588.2	62.2047	assited_income_SES_subset	YES	9
591	Urinary tract infection	11	genitourinary	black	14156	66903	6.01e-44	0.912628	0.784	1.041	TRUE	591	43.2215	assited_income_SES_subset	YES	9
596	Other disorders of bladder	11	genitourinary	black	4746	90423	2.02e-06	0.477903	0.281	0.675	TRUE	596	5.69474	assited_income_SES_subset	YES	9
216	Benign neoplasm of skin	2	neoplasms	darkcyan	15712	75434	4.13e-88	-1.45873	-1.602	-1.315	TRUE	216	87.3839	no_health_insurance_SES_subset	YES	9
228	Hemangioma and lymphangioma, any site	2	neoplasms	darkcyan	5642	91586	2.47e-35	-1.40151	-1.623	-1.18	TRUE	228	34.6068	no_health_insurance_SES_subset	YES	9
228.1	Hemangioma of skin and subcutaneous tissue	2	neoplasms	darkcyan	4556	91586	3.53e-44	-1.79338	-2.045	-1.541	TRUE	228.1	43.4528	no_health_insurance_SES_subset	YES	9
249	Secondary diabetes mellitus	3	endocrine/metabolic	brown	1649	61523	1.78e-12	1.31568	0.95	1.681	TRUE	249	11.7507	no_health_insurance_SES_subset	YES	9
250	Diabetes mellitus	3	endocrine/metabolic	brown	21482	61523	8.33e-246	2.01213	1.894	2.13	TRUE	250	245.079	no_health_insurance_SES_subset	YES	9
250.1	Type 1 diabetes	3	endocrine/metabolic	brown	2319	61523	1.54e-17	1.32893	1.023	1.635	TRUE	250.1	16.812	no_health_insurance_SES_subset	YES	9
250.2	Type 2 diabetes	3	endocrine/metabolic	brown	21182	61523	4.99e-254	2.05826	1.94	2.177	TRUE	250.2	253.302	no_health_insurance_SES_subset	YES	9
250.22	Type 2 diabetes with renal manifestations	3	endocrine/metabolic	brown	4311	61523	5.93e-68	2.01207	1.786	2.238	TRUE	250.22	67.2267	no_health_insurance_SES_subset	YES	9
250.23	Type 2 diabetes with ophthalmic manifestations	3	endocrine/metabolic	brown	2223	61523	9.81e-86	2.92038	2.629	3.212	TRUE	250.23	85.0085	no_health_insurance_SES_subset	YES	9
250.24	Type 2 diabetes with neurological manifestations	3	endocrine/metabolic	brown	5783	61523	1.47e-71	1.83792	1.637	2.039	TRUE	250.24	70.8325	no_health_insurance_SES_subset	YES	9
250.25	Diabetes type 2 with peripheral circulatory disorders	3	endocrine/metabolic	brown	2123	61523	3.7e-13	1.1852	0.866	1.505	TRUE	250.25	12.4317	no_health_insurance_SES_subset	YES	9
250.42	Other abnormal glucose	3	endocrine/metabolic	brown	12236	61523	4.06e-26	0.801884	0.653	0.951	TRUE	250.42	25.3911	no_health_insurance_SES_subset	YES	9
250.6	Polyneuropathy in diabetes	3	endocrine/metabolic	brown	3592	61523	1.24e-20	1.20908	0.955	1.464	TRUE	250.6	19.9051	no_health_insurance_SES_subset	YES	9
260	Protein-calorie malnutrition	3	endocrine/metabolic	brown	2156	64601	1.92e-15	1.25548	0.946	1.565	TRUE	260	14.7175	no_health_insurance_SES_subset	YES	9
271	Disorders of carbohydrate transport and metabolism	3	endocrine/metabolic	brown	8110	90520	3.13e-41	1.09537	0.936	1.255	TRUE	271	40.5051	no_health_insurance_SES_subset	YES	9
271.3	Intestinal disaccharidase deficiencies and disaccharide malabsorption	3	endocrine/metabolic	brown	7966	90520	9.01e-41	1.09732	0.936	1.258	TRUE	271.3	40.0453	no_health_insurance_SES_subset	YES	9
275	Disorders of mineral metabolism	3	endocrine/metabolic	brown	7051	90703	7.26e-28	0.985122	0.809	1.162	TRUE	275	27.1393	no_health_insurance_SES_subset	YES	9
275.3	Disorders of magnesium metabolism	3	endocrine/metabolic	brown	2500	90703	4.9e-49	2.02488	1.755	2.295	TRUE	275.3	48.31	no_health_insurance_SES_subset	YES	9
275.5	Disorders of calcium/phosphorus metabolism	3	endocrine/metabolic	brown	2312	90703	1.18e-11	1.01428	0.721	1.307	TRUE	275.5	10.9274	no_health_insurance_SES_subset	YES	9
275.53	Disorders of phosphorus metabolism	3	endocrine/metabolic	brown	1023	90703	1.26e-08	1.24304	0.815	1.671	TRUE	275.53	7.90064	no_health_insurance_SES_subset	YES	9
276	Disorders of fluid, electrolyte, and acid-base balance	3	endocrine/metabolic	brown	15251	76271	1.57e-44	0.946555	0.814	1.079	TRUE	276	43.8055	no_health_insurance_SES_subset	YES	9
276.1	Electrolyte imbalance	3	endocrine/metabolic	brown	12172	76271	5.89e-36	0.924338	0.78	1.069	TRUE	276.1	35.2297	no_health_insurance_SES_subset	YES	9
276.12	Hyposmolality and/or hyponatremia	3	endocrine/metabolic	brown	3778	76271	7.36e-15	0.937653	0.701	1.174	TRUE	276.12	14.133	no_health_insurance_SES_subset	YES	9
276.13	Hyperpotassemia	3	endocrine/metabolic	brown	3268	76271	5.71e-11	0.861611	0.604	1.119	TRUE	276.13	10.2435	no_health_insurance_SES_subset	YES	9
276.4	Acid-base balance disorder	3	endocrine/metabolic	brown	2471	76271	5.08e-71	2.41974	2.154	2.686	TRUE	276.4	70.2943	no_health_insurance_SES_subset	YES	9
276.41	Acidosis	3	endocrine/metabolic	brown	2163	76271	1.01e-65	2.46383	2.182	2.746	TRUE	276.41	64.9967	no_health_insurance_SES_subset	YES	9
276.5	Hypovolemia	3	endocrine/metabolic	brown	4530	76271	1.51e-44	1.54288	1.327	1.759	TRUE	276.5	43.8204	no_health_insurance_SES_subset	YES	9
276.6	Fluid overload	3	endocrine/metabolic	brown	1143	76271	8.39e-10	1.28806	0.877	1.699	TRUE	276.6	9.0762	no_health_insurance_SES_subset	YES	9
278	Overweight, obesity and other hyperalimentation	3	endocrine/metabolic	brown	31277	63543	2.02e-81	0.993494	0.892	1.095	TRUE	278	80.6954	no_health_insurance_SES_subset	YES	9
278.1	Obesity	3	endocrine/metabolic	brown	31010	63543	1.72e-81	0.996296	0.894	1.098	TRUE	278.1	80.7647	no_health_insurance_SES_subset	YES	9
278.11	Morbid obesity	3	endocrine/metabolic	brown	13494	63543	4.23e-18	0.624872	0.484	0.766	TRUE	278.11	17.3737	no_health_insurance_SES_subset	YES	9
401	Hypertension	8	circulatory system	red	49997	46678	1.79e-292	2.0229	1.914	2.131	TRUE	401	291.748	no_health_insurance_SES_subset	YES	9
401.1	Essential hypertension	8	circulatory system	red	49444	46678	4.86e-291	2.02358	1.915	2.132	TRUE	401.1	290.313	no_health_insurance_SES_subset	YES	9
401.2	Hypertensive heart and/or renal disease	8	circulatory system	red	8052	46678	2.12e-218	3.1855	2.988	3.383	TRUE	401.2	217.673	no_health_insurance_SES_subset	YES	9
401.21	Hypertensive heart disease	8	circulatory system	red	3472	46678	1.5e-105	2.95239	2.687	3.218	TRUE	401.21	104.824	no_health_insurance_SES_subset	YES	9
401.22	Hypertensive chronic kidney disease	8	circulatory system	red	4792	46678	3.33e-139	3.0459	2.808	3.284	TRUE	401.22	138.477	no_health_insurance_SES_subset	YES	9
411	Ischemic Heart Disease	8	circulatory system	red	15760	79327	2.99e-26	0.751857	0.613	0.891	TRUE	411	25.5243	no_health_insurance_SES_subset	YES	9
411.2	Myocardial infarction	8	circulatory system	red	4484	79327	3.18e-14	0.866879	0.643	1.091	TRUE	411.2	13.4976	no_health_insurance_SES_subset	YES	9
411.4	Coronary atherosclerosis	8	circulatory system	red	12979	79327	3.26e-28	0.845599	0.695	0.996	TRUE	411.4	27.4863	no_health_insurance_SES_subset	YES	9
414	Other forms of chronic heart disease	8	circulatory system	red	2264	79327	4.58e-33	1.7945	1.501	2.088	TRUE	414	32.3396	no_health_insurance_SES_subset	YES	9
415	Pulmonary heart disease	8	circulatory system	red	3782	91269	2.17e-14	0.910087	0.677	1.144	TRUE	415	13.6632	no_health_insurance_SES_subset	YES	9
415.2	Chronic pulmonary heart disease	8	circulatory system	red	1468	91269	1.97e-07	0.979366	0.61	1.348	TRUE	415.2	6.70651	no_health_insurance_SES_subset	YES	9
416	Cardiomegaly	8	circulatory system	red	3344	91269	2.69e-25	1.29848	1.054	1.543	TRUE	416	24.5699	no_health_insurance_SES_subset	YES	9
418	Nonspecific chest pain	8	circulatory system	red	28602	59440	2.58e-28	0.631719	0.52	0.744	TRUE	418	27.5886	no_health_insurance_SES_subset	YES	9
428	Congestive heart failure; nonhypertensive	8	circulatory system	red	7063	82566	1.72e-66	1.55114	1.375	1.728	TRUE	428	65.7634	no_health_insurance_SES_subset	YES	9
428.1	Congestive heart failure (CHF) NOS	8	circulatory system	red	4712	82566	1.86e-55	1.6684	1.46	1.877	TRUE	428.1	54.73	no_health_insurance_SES_subset	YES	9
428.3	Heart failure with reduced EF [Systolic or combined heart failure]	8	circulatory system	red	3329	82566	1.62e-35	1.53342	1.292	1.775	TRUE	428.3	34.7905	no_health_insurance_SES_subset	YES	9
428.4	Heart failure with preserved EF [Diastolic heart failure]	8	circulatory system	red	3205	82566	4.47e-22	1.2615	1.006	1.517	TRUE	428.4	21.3495	no_health_insurance_SES_subset	YES	9
433	Cerebrovascular disease	8	circulatory system	red	8721	89116	3.7e-21	0.797474	0.632	0.963	TRUE	433	20.4318	no_health_insurance_SES_subset	YES	9
433.2	Occlusion of cerebral arteries	8	circulatory system	red	3253	89116	1.46e-27	1.36348	1.118	1.609	TRUE	433.2	26.8359	no_health_insurance_SES_subset	YES	9
433.21	Cerebral artery occlusion, with cerebral infarction	8	circulatory system	red	3119	89116	2.84e-28	1.40462	1.155	1.654	TRUE	433.21	27.5462	no_health_insurance_SES_subset	YES	9
433.8	Late effects of cerebrovascular disease	8	circulatory system	red	1376	89116	5.25e-19	1.65438	1.29	2.018	TRUE	433.8	18.2797	no_health_insurance_SES_subset	YES	9
443.7	Peripheral angiopathy in diseases classified elsewhere	8	circulatory system	red	1151	82869	3.08e-06	1.00195	0.581	1.423	TRUE	443.7	5.51171	no_health_insurance_SES_subset	YES	9
452	Other venous embolism and thrombosis	8	circulatory system	red	4264	66102	2.77e-23	1.18663	0.953	1.421	TRUE	452	22.5581	no_health_insurance_SES_subset	YES	9
452.2	Deep vein thrombosis [DVT]	8	circulatory system	red	3320	66102	7.18e-23	1.29818	1.04	1.557	TRUE	452.2	22.144	no_health_insurance_SES_subset	YES	9
456	Chronic venous insufficiency [CVI]	8	circulatory system	red	3648	66102	9.22e-11	0.866073	0.604	1.128	TRUE	456	10.0354	no_health_insurance_SES_subset	YES	9
496	Chronic airway obstruction	9	respiratory	coral4	8823	66544	2.37e-22	0.829353	0.662	0.997	TRUE	496	21.6246	no_health_insurance_SES_subset	YES	9
496.2	Chronic bronchitis	9	respiratory	coral4	3116	66544	2.8e-06	0.634163	0.369	0.899	TRUE	496.2	5.55273	no_health_insurance_SES_subset	YES	9
496.21	Obstructive chronic bronchitis	9	respiratory	coral4	2233	66544	1.45e-10	0.991665	0.688	1.295	TRUE	496.21	9.83995	no_health_insurance_SES_subset	YES	9
509	Respiratory failure, insufficiency, arrest	9	respiratory	coral4	4020	84345	2.17e-50	1.68262	1.462	1.904	TRUE	509	49.6634	no_health_insurance_SES_subset	YES	9
509.1	Respiratory failure	9	respiratory	coral4	3221	84345	9.61e-58	1.95988	1.72	2.2	TRUE	509.1	57.0172	no_health_insurance_SES_subset	YES	9
509.8	Dependence on respirator [Ventilator] or supplemental oxygen	9	respiratory	coral4	1196	84345	6.34e-23	1.93367	1.549	2.318	TRUE	509.8	22.1981	no_health_insurance_SES_subset	YES	9
512	Other symptoms of respiratory system	9	respiratory	coral4	43227	43654	5.44e-39	0.722787	0.614	0.831	TRUE	512	38.2647	no_health_insurance_SES_subset	YES	9
512.7	Shortness of breath	9	respiratory	coral4	21049	43654	8.2e-59	1.12366	0.987	1.26	TRUE	512.7	58.0864	no_health_insurance_SES_subset	YES	9
512.8	Cough	9	respiratory	coral4	21407	43654	2.38e-31	0.822239	0.684	0.961	TRUE	512.8	30.6231	no_health_insurance_SES_subset	YES	9
512.9	Other dyspnea	9	respiratory	coral4	20098	43654	5.85e-29	0.789745	0.651	0.928	TRUE	512.9	28.2329	no_health_insurance_SES_subset	YES	9
580	Nephritis; nephrosis; renal sclerosis	11	genitourinary	black	1834	75131	2.44e-18	1.47112	1.141	1.801	TRUE	580	17.6129	no_health_insurance_SES_subset	YES	9
585	Renal failure	11	genitourinary	black	12013	75131	4.01e-133	1.82578	1.68	1.972	TRUE	585	132.397	no_health_insurance_SES_subset	YES	9
585.1	Acute renal failure	11	genitourinary	black	6676	75131	1.9e-79	1.77623	1.592	1.961	TRUE	585.1	78.7204	no_health_insurance_SES_subset	YES	9
585.3	Chronic renal failure [CKD]	11	genitourinary	black	7694	75131	2.29e-118	2.05902	1.885	2.233	TRUE	585.3	117.641	no_health_insurance_SES_subset	YES	9
585.31	Renal dialysis	11	genitourinary	black	587	75131	1e-14	2.16473	1.616	2.713	TRUE	585.31	13.9986	no_health_insurance_SES_subset	YES	9
585.32	End stage renal disease	11	genitourinary	black	1463	75131	1.07e-52	2.66871	2.326	3.011	TRUE	585.32	51.9695	no_health_insurance_SES_subset	YES	9
585.33	Chronic Kidney Disease, Stage III	11	genitourinary	black	4300	75131	4.74e-28	1.31209	1.078	1.546	TRUE	585.33	27.3246	no_health_insurance_SES_subset	YES	9
585.34	Chronic Kidney Disease, Stage IV	11	genitourinary	black	1574	75131	2.3e-17	1.54818	1.19	1.906	TRUE	585.34	16.6387	no_health_insurance_SES_subset	YES	9
585.4	Chronic kidney disease, Stage I or II	11	genitourinary	black	2315	75131	6.88e-09	0.899454	0.595	1.204	TRUE	585.4	8.16253	no_health_insurance_SES_subset	YES	9
586	Other disorders of the kidney and ureters	11	genitourinary	black	8936	75131	2.28e-23	0.858502	0.69	1.027	TRUE	586	22.6417	no_health_insurance_SES_subset	YES	9
586.2	Cyst of kidney, acquired	11	genitourinary	black	3132	75131	2.47e-26	1.38663	1.131	1.643	TRUE	586.2	25.6076	no_health_insurance_SES_subset	YES	9
588	Disorders resulting from impaired renal function	11	genitourinary	black	1499	75131	2.15e-27	1.96606	1.611	2.321	TRUE	588	26.6666	no_health_insurance_SES_subset	YES	9
588.2	Secondary hyperparathyroidism (of renal origin)	11	genitourinary	black	1264	75131	4.82e-23	1.93286	1.55	2.316	TRUE	588.2	22.3167	no_health_insurance_SES_subset	YES	9
591	Urinary tract infection	11	genitourinary	black	14156	66903	5.05e-11	0.487805	0.342	0.633	TRUE	591	10.297	no_health_insurance_SES_subset	YES	9
596	Other disorders of bladder	11	genitourinary	black	4746	90423	6.2e-10	0.680004	0.465	0.895	TRUE	596	9.20775	no_health_insurance_SES_subset	YES	9
216	Benign neoplasm of skin	2	neoplasms	darkcyan	15712	75434	7.61e-77	-1.50246	-1.661	-1.344	TRUE	216	76.1189	area_poverty_SES_subset	YES	9
228	Hemangioma and lymphangioma, any site	2	neoplasms	darkcyan	5642	91586	7.02e-12	-0.838354	-1.078	-0.599	TRUE	228	11.1534	area_poverty_SES_subset	YES	9
228.1	Hemangioma of skin and subcutaneous tissue	2	neoplasms	darkcyan	4556	91586	3.11e-13	-0.99284	-1.26	-0.726	TRUE	228.1	12.5076	area_poverty_SES_subset	YES	9
249	Secondary diabetes mellitus	3	endocrine/metabolic	brown	1649	61523	2.16e-50	3.01326	2.618	3.409	TRUE	249	49.665	area_poverty_SES_subset	YES	9
250	Diabetes mellitus	3	endocrine/metabolic	brown	21482	61523	3.89e-224	2.28065	2.141	2.421	TRUE	250	223.41	area_poverty_SES_subset	YES	9
250.1	Type 1 diabetes	3	endocrine/metabolic	brown	2319	61523	1.63e-36	2.18027	1.842	2.519	TRUE	250.1	35.7891	area_poverty_SES_subset	YES	9
250.2	Type 2 diabetes	3	endocrine/metabolic	brown	21182	61523	4.29e-231	2.33113	2.19	2.472	TRUE	250.2	230.367	area_poverty_SES_subset	YES	9
250.22	Type 2 diabetes with renal manifestations	3	endocrine/metabolic	brown	4311	61523	1.27e-98	2.82767	2.565	3.091	TRUE	250.22	97.8956	area_poverty_SES_subset	YES	9
250.23	Type 2 diabetes with ophthalmic manifestations	3	endocrine/metabolic	brown	2223	61523	2.46e-73	3.18719	2.842	3.532	TRUE	250.23	72.6098	area_poverty_SES_subset	YES	9
250.24	Type 2 diabetes with neurological manifestations	3	endocrine/metabolic	brown	5783	61523	1.99e-100	2.55128	2.316	2.786	TRUE	250.24	99.702	area_poverty_SES_subset	YES	9
250.25	Diabetes type 2 with peripheral circulatory disorders	3	endocrine/metabolic	brown	2123	61523	7.09e-49	2.61922	2.27	2.969	TRUE	250.25	48.1494	area_poverty_SES_subset	YES	9
250.42	Other abnormal glucose	3	endocrine/metabolic	brown	12236	61523	2.04e-36	1.10791	0.936	1.28	TRUE	250.42	35.6911	area_poverty_SES_subset	YES	9
250.6	Polyneuropathy in diabetes	3	endocrine/metabolic	brown	3592	61523	4.74e-59	2.38427	2.096	2.673	TRUE	250.6	58.3245	area_poverty_SES_subset	YES	9
260	Protein-calorie malnutrition	3	endocrine/metabolic	brown	2156	64601	1.14e-19	1.60117	1.255	1.947	TRUE	260	18.9415	area_poverty_SES_subset	YES	9
271	Disorders of carbohydrate transport and metabolism	3	endocrine/metabolic	brown	8110	90520	8.16e-95	1.913	1.732	2.094	TRUE	271	94.0884	area_poverty_SES_subset	YES	9
271.3	Intestinal disaccharidase deficiencies and disaccharide malabsorption	3	endocrine/metabolic	brown	7966	90520	5.58e-96	1.93856	1.756	2.121	TRUE	271.3	95.2534	area_poverty_SES_subset	YES	9
275	Disorders of mineral metabolism	3	endocrine/metabolic	brown	7051	90703	1.37e-45	1.44921	1.249	1.65	TRUE	275	44.8624	area_poverty_SES_subset	YES	9
275.3	Disorders of magnesium metabolism	3	endocrine/metabolic	brown	2500	90703	1.74e-70	2.76624	2.461	3.072	TRUE	275.3	69.7603	area_poverty_SES_subset	YES	9
275.5	Disorders of calcium/phosphorus metabolism	3	endocrine/metabolic	brown	2312	90703	2.09e-18	1.49798	1.163	1.833	TRUE	275.5	17.6805	area_poverty_SES_subset	YES	9
275.53	Disorders of phosphorus metabolism	3	endocrine/metabolic	brown	1023	90703	3.59e-19	2.21051	1.726	2.695	TRUE	275.53	18.4451	area_poverty_SES_subset	YES	9
276	Disorders of fluid, electrolyte, and acid-base balance	3	endocrine/metabolic	brown	15251	76271	3.99e-116	1.7758	1.624	1.928	TRUE	276	115.399	area_poverty_SES_subset	YES	9
276.1	Electrolyte imbalance	3	endocrine/metabolic	brown	12172	76271	2.74e-88	1.6905	1.524	1.857	TRUE	276.1	87.5623	area_poverty_SES_subset	YES	9
276.12	Hyposmolality and/or hyponatremia	3	endocrine/metabolic	brown	3778	76271	8.81e-29	1.56548	1.29	1.841	TRUE	276.12	28.0552	area_poverty_SES_subset	YES	9
276.13	Hyperpotassemia	3	endocrine/metabolic	brown	3268	76271	7.97e-35	1.84785	1.554	2.142	TRUE	276.13	34.0987	area_poverty_SES_subset	YES	9
276.4	Acid-base balance disorder	3	endocrine/metabolic	brown	2471	76271	5.64e-108	3.48288	3.174	3.792	TRUE	276.4	107.248	area_poverty_SES_subset	YES	9
276.41	Acidosis	3	endocrine/metabolic	brown	2163	76271	1.38e-93	3.44656	3.117	3.776	TRUE	276.41	92.8589	area_poverty_SES_subset	YES	9
276.5	Hypovolemia	3	endocrine/metabolic	brown	4530	76271	1.52e-73	2.28353	2.037	2.53	TRUE	276.5	72.8194	area_poverty_SES_subset	YES	9
276.6	Fluid overload	3	endocrine/metabolic	brown	1143	76271	9.01e-31	2.72439	2.261	3.187	TRUE	276.6	30.0452	area_poverty_SES_subset	YES	9
278	Overweight, obesity and other hyperalimentation	3	endocrine/metabolic	brown	31277	63543	4.51e-83	1.17001	1.051	1.289	TRUE	278	82.3459	area_poverty_SES_subset	YES	9
278.1	Obesity	3	endocrine/metabolic	brown	31010	63543	2.61e-84	1.18142	1.062	1.3	TRUE	278.1	83.5832	area_poverty_SES_subset	YES	9
278.11	Morbid obesity	3	endocrine/metabolic	brown	13494	63543	1.16e-59	1.31293	1.155	1.471	TRUE	278.11	58.9365	area_poverty_SES_subset	YES	9
401	Hypertension	8	circulatory system	red	49997	46678	5.26e-277	2.35641	2.227	2.486	TRUE	401	276.279	area_poverty_SES_subset	YES	9
401.1	Essential hypertension	8	circulatory system	red	49444	46678	1.54e-274	2.35475	2.224	2.485	TRUE	401.1	273.812	area_poverty_SES_subset	YES	9
401.2	Hypertensive heart and/or renal disease	8	circulatory system	red	8052	46678	2.04e-217	3.84471	3.605	4.084	TRUE	401.2	216.691	area_poverty_SES_subset	YES	9
401.21	Hypertensive heart disease	8	circulatory system	red	3472	46678	1.58e-121	3.85449	3.532	4.177	TRUE	401.21	120.801	area_poverty_SES_subset	YES	9
401.22	Hypertensive chronic kidney disease	8	circulatory system	red	4792	46678	6.23e-142	3.70437	3.418	3.991	TRUE	401.22	141.205	area_poverty_SES_subset	YES	9
411	Ischemic Heart Disease	8	circulatory system	red	15760	79327	4.33e-44	1.14769	0.986	1.309	TRUE	411	43.364	area_poverty_SES_subset	YES	9
411.2	Myocardial infarction	8	circulatory system	red	4484	79327	4.39e-34	1.59304	1.337	1.85	TRUE	411.2	33.3574	area_poverty_SES_subset	YES	9
411.4	Coronary atherosclerosis	8	circulatory system	red	12979	79327	1.94e-29	1.01688	0.84	1.194	TRUE	411.4	28.7132	area_poverty_SES_subset	YES	9
414	Other forms of chronic heart disease	8	circulatory system	red	2264	79327	9.35e-11	1.16513	0.813	1.518	TRUE	414	10.0291	area_poverty_SES_subset	YES	9
415	Pulmonary heart disease	8	circulatory system	red	3782	91269	4.18e-19	1.22306	0.955	1.491	TRUE	415	18.3791	area_poverty_SES_subset	YES	9
415.2	Chronic pulmonary heart disease	8	circulatory system	red	1468	91269	1.62e-15	1.66441	1.255	2.074	TRUE	415.2	14.7896	area_poverty_SES_subset	YES	9
416	Cardiomegaly	8	circulatory system	red	3344	91269	3.59e-51	2.1244	1.848	2.401	TRUE	416	50.4455	area_poverty_SES_subset	YES	9
418	Nonspecific chest pain	8	circulatory system	red	28602	59440	4.13e-174	1.90451	1.772	2.037	TRUE	418	173.385	area_poverty_SES_subset	YES	9
428	Congestive heart failure; nonhypertensive	8	circulatory system	red	7063	82566	2.96e-116	2.41161	2.205	2.618	TRUE	428	115.529	area_poverty_SES_subset	YES	9
428.1	Congestive heart failure (CHF) NOS	8	circulatory system	red	4712	82566	1.37e-91	2.50962	2.267	2.752	TRUE	428.1	90.8632	area_poverty_SES_subset	YES	9
428.3	Heart failure with reduced EF [Systolic or combined heart failure]	8	circulatory system	red	3329	82566	8.99e-70	2.54918	2.266	2.832	TRUE	428.3	69.0463	area_poverty_SES_subset	YES	9
428.4	Heart failure with preserved EF [Diastolic heart failure]	8	circulatory system	red	3205	82566	3.77e-53	2.28223	1.991	2.574	TRUE	428.4	52.424	area_poverty_SES_subset	YES	9
433	Cerebrovascular disease	8	circulatory system	red	8721	89116	7.18e-38	1.25033	1.06	1.441	TRUE	433	37.144	area_poverty_SES_subset	YES	9
433.2	Occlusion of cerebral arteries	8	circulatory system	red	3253	89116	3.03e-35	1.79938	1.515	2.084	TRUE	433.2	34.519	area_poverty_SES_subset	YES	9
433.21	Cerebral artery occlusion, with cerebral infarction	8	circulatory system	red	3119	89116	6.56e-34	1.79978	1.509	2.09	TRUE	433.21	33.1828	area_poverty_SES_subset	YES	9
433.8	Late effects of cerebrovascular disease	8	circulatory system	red	1376	89116	8.58e-34	2.52173	2.114	2.93	TRUE	433.8	33.0665	area_poverty_SES_subset	YES	9
443.7	Peripheral angiopathy in diseases classified elsewhere	8	circulatory system	red	1151	82869	7.39e-26	2.40352	1.955	2.852	TRUE	443.7	25.1312	area_poverty_SES_subset	YES	9
452	Other venous embolism and thrombosis	8	circulatory system	red	4264	66102	3.92e-15	1.07713	0.808	1.346	TRUE	452	14.4067	area_poverty_SES_subset	YES	9
452.2	Deep vein thrombosis [DVT]	8	circulatory system	red	3320	66102	1.89e-14	1.16662	0.868	1.465	TRUE	452.2	13.7225	area_poverty_SES_subset	YES	9
456	Chronic venous insufficiency [CVI]	8	circulatory system	red	3648	66102	4.94e-19	1.3208	1.03	1.611	TRUE	456	18.3066	area_poverty_SES_subset	YES	9
496	Chronic airway obstruction	9	respiratory	coral4	8823	66544	4.31e-68	1.71792	1.525	1.911	TRUE	496	67.366	area_poverty_SES_subset	YES	9
496.2	Chronic bronchitis	9	respiratory	coral4	3116	66544	2.47e-39	1.95629	1.664	2.248	TRUE	496.2	38.6074	area_poverty_SES_subset	YES	9
496.21	Obstructive chronic bronchitis	9	respiratory	coral4	2233	66544	7.28e-44	2.364	2.03	2.698	TRUE	496.21	43.138	area_poverty_SES_subset	YES	9
509	Respiratory failure, insufficiency, arrest	9	respiratory	coral4	4020	84345	6.17e-63	2.1636	1.91	2.417	TRUE	509	62.2094	area_poverty_SES_subset	YES	9
509.1	Respiratory failure	9	respiratory	coral4	3221	84345	4.22e-67	2.42996	2.155	2.705	TRUE	509.1	66.3745	area_poverty_SES_subset	YES	9
509.8	Dependence on respirator [Ventilator] or supplemental oxygen	9	respiratory	coral4	1196	84345	1.03e-31	2.56358	2.135	2.992	TRUE	509.8	30.9871	area_poverty_SES_subset	YES	9
512	Other symptoms of respiratory system	9	respiratory	coral4	43227	43654	1.89e-140	1.70178	1.57	1.834	TRUE	512	139.723	area_poverty_SES_subset	YES	9
512.7	Shortness of breath	9	respiratory	coral4	21049	43654	4.88e-164	2.30493	2.139	2.47	TRUE	512.7	163.312	area_poverty_SES_subset	YES	9
512.8	Cough	9	respiratory	coral4	21407	43654	2.26e-105	1.85348	1.687	2.02	TRUE	512.8	104.645	area_poverty_SES_subset	YES	9
512.9	Other dyspnea	9	respiratory	coral4	20098	43654	2.16e-68	1.51241	1.343	1.682	TRUE	512.9	67.6657	area_poverty_SES_subset	YES	9
580	Nephritis; nephrosis; renal sclerosis	11	genitourinary	black	1834	75131	1.47e-36	2.35707	1.991	2.723	TRUE	580	35.8335	area_poverty_SES_subset	YES	9
585	Renal failure	11	genitourinary	black	12013	75131	1.67e-171	2.4286	2.258	2.599	TRUE	585	170.777	area_poverty_SES_subset	YES	9
585.1	Acute renal failure	11	genitourinary	black	6676	75131	1.19e-150	2.81859	2.607	3.03	TRUE	585.1	149.926	area_poverty_SES_subset	YES	9
585.3	Chronic renal failure [CKD]	11	genitourinary	black	7694	75131	2.43e-119	2.43265	2.227	2.638	TRUE	585.3	118.615	area_poverty_SES_subset	YES	9
585.31	Renal dialysis	11	genitourinary	black	587	75131	1.01e-22	3.04309	2.435	3.651	TRUE	585.31	21.997	area_poverty_SES_subset	YES	9
585.32	End stage renal disease	11	genitourinary	black	1463	75131	8.7e-58	3.23027	2.835	3.625	TRUE	585.32	57.0602	area_poverty_SES_subset	YES	9
585.33	Chronic Kidney Disease, Stage III	11	genitourinary	black	4300	75131	1.99e-43	1.9026	1.633	2.172	TRUE	585.33	42.7005	area_poverty_SES_subset	YES	9
585.34	Chronic Kidney Disease, Stage IV	11	genitourinary	black	1574	75131	5.56e-35	2.51558	2.116	2.915	TRUE	585.34	34.2551	area_poverty_SES_subset	YES	9
585.4	Chronic kidney disease, Stage I or II	11	genitourinary	black	2315	75131	7.13e-23	1.72281	1.38	2.066	TRUE	585.4	22.1472	area_poverty_SES_subset	YES	9
586	Other disorders of the kidney and ureters	11	genitourinary	black	8936	75131	2.52e-35	1.25158	1.054	1.449	TRUE	586	34.598	area_poverty_SES_subset	YES	9
586.2	Cyst of kidney, acquired	11	genitourinary	black	3132	75131	9.96e-23	1.5159	1.213	1.819	TRUE	586.2	22.0018	area_poverty_SES_subset	YES	9
588	Disorders resulting from impaired renal function	11	genitourinary	black	1499	75131	4.17e-51	3.01857	2.625	3.412	TRUE	588	50.3799	area_poverty_SES_subset	YES	9
588.2	Secondary hyperparathyroidism (of renal origin)	11	genitourinary	black	1264	75131	1.39e-48	3.15156	2.73	3.573	TRUE	588.2	47.8577	area_poverty_SES_subset	YES	9
591	Urinary tract infection	11	genitourinary	black	14156	66903	5.99e-52	1.266	1.102	1.43	TRUE	591	51.2227	area_poverty_SES_subset	YES	9
596	Other disorders of bladder	11	genitourinary	black	4746	90423	1.86e-07	0.653309	0.408	0.899	TRUE	596	6.73047	area_poverty_SES_subset	YES	9
216	Benign neoplasm of skin	2	neoplasms	darkcyan	15712	75434	1.82e-106	-2.31772	-2.525	-2.11	TRUE	216	105.739	vacant_housing_SES_subset	YES	9
228	Hemangioma and lymphangioma, any site	2	neoplasms	darkcyan	5642	91586	1.06e-25	-1.68311	-1.998	-1.368	TRUE	228	24.9739	vacant_housing_SES_subset	YES	9
228.1	Hemangioma of skin and subcutaneous tissue	2	neoplasms	darkcyan	4556	91586	7.15e-33	-2.2123	-2.575	-1.849	TRUE	228.1	32.1457	vacant_housing_SES_subset	YES	9
249	Secondary diabetes mellitus	3	endocrine/metabolic	brown	1649	61523	4.56e-11	1.45013	1.018	1.882	TRUE	249	10.3409	vacant_housing_SES_subset	YES	9
250	Diabetes mellitus	3	endocrine/metabolic	brown	21482	61523	2.35e-131	2.02855	1.866	2.192	TRUE	250	130.629	vacant_housing_SES_subset	YES	9
250.1	Type 1 diabetes	3	endocrine/metabolic	brown	2319	61523	1.03e-20	1.72781	1.365	2.091	TRUE	250.1	19.9887	vacant_housing_SES_subset	YES	9
250.2	Type 2 diabetes	3	endocrine/metabolic	brown	21182	61523	2.53e-135	2.07051	1.907	2.234	TRUE	250.2	134.597	vacant_housing_SES_subset	YES	9
250.22	Type 2 diabetes with renal manifestations	3	endocrine/metabolic	brown	4311	61523	1.35e-43	1.9564	1.679	2.233	TRUE	250.22	42.87	vacant_housing_SES_subset	YES	9
250.23	Type 2 diabetes with ophthalmic manifestations	3	endocrine/metabolic	brown	2223	61523	1.1e-19	1.69363	1.328	2.059	TRUE	250.23	18.9598	vacant_housing_SES_subset	YES	9
250.24	Type 2 diabetes with neurological manifestations	3	endocrine/metabolic	brown	5783	61523	2.44e-65	2.15976	1.912	2.408	TRUE	250.24	64.6122	vacant_housing_SES_subset	YES	9
250.25	Diabetes type 2 with peripheral circulatory disorders	3	endocrine/metabolic	brown	2123	61523	5.74e-29	2.01315	1.66	2.366	TRUE	250.25	28.241	vacant_housing_SES_subset	YES	9
250.42	Other abnormal glucose	3	endocrine/metabolic	brown	12236	61523	1.46e-17	0.856173	0.659	1.053	TRUE	250.42	16.8347	vacant_housing_SES_subset	YES	9
250.6	Polyneuropathy in diabetes	3	endocrine/metabolic	brown	3592	61523	1.19e-32	1.81958	1.52	2.119	TRUE	250.6	31.925	vacant_housing_SES_subset	YES	9
260	Protein-calorie malnutrition	3	endocrine/metabolic	brown	2156	64601	1.06e-20	1.70154	1.344	2.059	TRUE	260	19.9761	vacant_housing_SES_subset	YES	9
271	Disorders of carbohydrate transport and metabolism	3	endocrine/metabolic	brown	8110	90520	1.46e-10	0.706963	0.491	0.923	TRUE	271	9.83632	vacant_housing_SES_subset	YES	9
271.3	Intestinal disaccharidase deficiencies and disaccharide malabsorption	3	endocrine/metabolic	brown	7966	90520	2.08e-10	0.706307	0.488	0.924	TRUE	271.3	9.68273	vacant_housing_SES_subset	YES	9
275	Disorders of mineral metabolism	3	endocrine/metabolic	brown	7051	90703	4.14e-45	1.58171	1.362	1.802	TRUE	275	44.3829	vacant_housing_SES_subset	YES	9
275.3	Disorders of magnesium metabolism	3	endocrine/metabolic	brown	2500	90703	1.81e-91	3.06046	2.765	3.356	TRUE	275.3	90.7431	vacant_housing_SES_subset	YES	9
275.5	Disorders of calcium/phosphorus metabolism	3	endocrine/metabolic	brown	2312	90703	3.35e-17	1.54583	1.187	1.905	TRUE	275.5	16.475	vacant_housing_SES_subset	YES	9
275.53	Disorders of phosphorus metabolism	3	endocrine/metabolic	brown	1023	90703	6.75e-14	1.94602	1.437	2.455	TRUE	275.53	13.1705	vacant_housing_SES_subset	YES	9
276	Disorders of fluid, electrolyte, and acid-base balance	3	endocrine/metabolic	brown	15251	76271	4.81e-137	2.18241	2.011	2.354	TRUE	276	136.318	vacant_housing_SES_subset	YES	9
276.1	Electrolyte imbalance	3	endocrine/metabolic	brown	12172	76271	2.1e-108	2.08403	1.899	2.269	TRUE	276.1	107.678	vacant_housing_SES_subset	YES	9
276.12	Hyposmolality and/or hyponatremia	3	endocrine/metabolic	brown	3778	76271	9.55e-36	1.81525	1.53	2.1	TRUE	276.12	35.0202	vacant_housing_SES_subset	YES	9
276.13	Hyperpotassemia	3	endocrine/metabolic	brown	3268	76271	5.81e-24	1.61464	1.301	1.928	TRUE	276.13	23.2359	vacant_housing_SES_subset	YES	9
276.4	Acid-base balance disorder	3	endocrine/metabolic	brown	2471	76271	1.31e-91	3.18562	2.878	3.493	TRUE	276.4	90.8826	vacant_housing_SES_subset	YES	9
276.41	Acidosis	3	endocrine/metabolic	brown	2163	76271	1.91e-83	3.19942	2.875	3.523	TRUE	276.41	82.7185	vacant_housing_SES_subset	YES	9
276.5	Hypovolemia	3	endocrine/metabolic	brown	4530	76271	2.54e-86	2.58749	2.33	2.845	TRUE	276.5	85.5949	vacant_housing_SES_subset	YES	9
276.6	Fluid overload	3	endocrine/metabolic	brown	1143	76271	1.11e-19	2.19427	1.72	2.668	TRUE	276.6	18.953	vacant_housing_SES_subset	YES	9
278	Overweight, obesity and other hyperalimentation	3	endocrine/metabolic	brown	31277	63543	1.78e-79	1.35834	1.217	1.499	TRUE	278	78.7506	vacant_housing_SES_subset	YES	9
278.1	Obesity	3	endocrine/metabolic	brown	31010	63543	5.71e-81	1.37387	1.233	1.515	TRUE	278.1	80.2436	vacant_housing_SES_subset	YES	9
278.11	Morbid obesity	3	endocrine/metabolic	brown	13494	63543	2.52e-69	1.62631	1.445	1.807	TRUE	278.11	68.598	vacant_housing_SES_subset	YES	9
401	Hypertension	8	circulatory system	red	49997	46678	1.17e-278	2.9927	2.828	3.157	TRUE	401	277.931	vacant_housing_SES_subset	YES	9
401.1	Essential hypertension	8	circulatory system	red	49444	46678	3.16e-275	2.98489	2.82	3.15	TRUE	401.1	274.501	vacant_housing_SES_subset	YES	9
401.2	Hypertensive heart and/or renal disease	8	circulatory system	red	8052	46678	2.8e-171	3.79867	3.532	4.066	TRUE	401.2	170.553	vacant_housing_SES_subset	YES	9
401.21	Hypertensive heart disease	8	circulatory system	red	3472	46678	3.32e-106	3.67474	3.346	4.004	TRUE	401.21	105.479	vacant_housing_SES_subset	YES	9
401.22	Hypertensive chronic kidney disease	8	circulatory system	red	4792	46678	1.58e-99	3.29056	2.986	3.595	TRUE	401.22	98.8026	vacant_housing_SES_subset	YES	9
411	Ischemic Heart Disease	8	circulatory system	red	15760	79327	9.32e-62	1.54415	1.362	1.727	TRUE	411	61.0306	vacant_housing_SES_subset	YES	9
411.2	Myocardial infarction	8	circulatory system	red	4484	79327	1.3e-41	1.88005	1.607	2.153	TRUE	411.2	40.8872	vacant_housing_SES_subset	YES	9
411.4	Coronary atherosclerosis	8	circulatory system	red	12979	79327	6.77e-54	1.55033	1.354	1.747	TRUE	411.4	53.1694	vacant_housing_SES_subset	YES	9
414	Other forms of chronic heart disease	8	circulatory system	red	2264	79327	8.46e-15	1.47166	1.1	1.843	TRUE	414	14.0725	vacant_housing_SES_subset	YES	9
415	Pulmonary heart disease	8	circulatory system	red	3782	91269	4.09e-22	1.4225	1.134	1.711	TRUE	415	21.3886	vacant_housing_SES_subset	YES	9
415.2	Chronic pulmonary heart disease	8	circulatory system	red	1468	91269	4.11e-15	1.7106	1.284	2.138	TRUE	415.2	14.3866	vacant_housing_SES_subset	YES	9
416	Cardiomegaly	8	circulatory system	red	3344	91269	8.91e-26	1.60412	1.305	1.904	TRUE	416	25.0502	vacant_housing_SES_subset	YES	9
418	Nonspecific chest pain	8	circulatory system	red	28602	59440	4.3e-97	1.66608	1.51	1.822	TRUE	418	96.3667	vacant_housing_SES_subset	YES	9
428	Congestive heart failure; nonhypertensive	8	circulatory system	red	7063	82566	1.7e-81	2.1524	1.932	2.373	TRUE	428	80.7697	vacant_housing_SES_subset	YES	9
428.1	Congestive heart failure (CHF) NOS	8	circulatory system	red	4712	82566	7.47e-75	2.33908	2.089	2.59	TRUE	428.1	74.1269	vacant_housing_SES_subset	YES	9
428.3	Heart failure with reduced EF [Systolic or combined heart failure]	8	circulatory system	red	3329	82566	4.88e-42	2.03752	1.744	2.331	TRUE	428.3	41.3114	vacant_housing_SES_subset	YES	9
428.4	Heart failure with preserved EF [Diastolic heart failure]	8	circulatory system	red	3205	82566	4.2e-34	1.89515	1.59	2.2	TRUE	428.4	33.3765	vacant_housing_SES_subset	YES	9
433	Cerebrovascular disease	8	circulatory system	red	8721	89116	2.19e-35	1.32557	1.116	1.535	TRUE	433	34.6594	vacant_housing_SES_subset	YES	9
433.2	Occlusion of cerebral arteries	8	circulatory system	red	3253	89116	1.3e-16	1.3178	1.006	1.63	TRUE	433.2	15.8846	vacant_housing_SES_subset	YES	9
433.21	Cerebral artery occlusion, with cerebral infarction	8	circulatory system	red	3119	89116	5.24e-15	1.27604	0.956	1.596	TRUE	433.21	14.2809	vacant_housing_SES_subset	YES	9
433.8	Late effects of cerebrovascular disease	8	circulatory system	red	1376	89116	1.48e-16	1.83198	1.397	2.267	TRUE	433.8	15.8296	vacant_housing_SES_subset	YES	9
443.7	Peripheral angiopathy in diseases classified elsewhere	8	circulatory system	red	1151	82869	2.5e-20	2.15768	1.7	2.615	TRUE	443.7	19.6024	vacant_housing_SES_subset	YES	9
452	Other venous embolism and thrombosis	8	circulatory system	red	4264	66102	4.79e-19	1.31028	1.022	1.598	TRUE	452	18.3195	vacant_housing_SES_subset	YES	9
452.2	Deep vein thrombosis [DVT]	8	circulatory system	red	3320	66102	2.83e-15	1.28302	0.965	1.601	TRUE	452.2	14.548	vacant_housing_SES_subset	YES	9
456	Chronic venous insufficiency [CVI]	8	circulatory system	red	3648	66102	1.09e-06	0.79847	0.477	1.12	TRUE	456	5.96248	vacant_housing_SES_subset	YES	9
496	Chronic airway obstruction	9	respiratory	coral4	8823	66544	1.79e-90	2.14364	1.935	2.352	TRUE	496	89.7481	vacant_housing_SES_subset	YES	9
496.2	Chronic bronchitis	9	respiratory	coral4	3116	66544	5.34e-42	2.09631	1.794	2.399	TRUE	496.2	41.2726	vacant_housing_SES_subset	YES	9
496.21	Obstructive chronic bronchitis	9	respiratory	coral4	2233	66544	6.6e-34	2.13148	1.787	2.476	TRUE	496.21	33.1806	vacant_housing_SES_subset	YES	9
509	Respiratory failure, insufficiency, arrest	9	respiratory	coral4	4020	84345	3.32e-71	2.42861	2.162	2.695	TRUE	509	70.4792	vacant_housing_SES_subset	YES	9
509.1	Respiratory failure	9	respiratory	coral4	3221	84345	6.49e-65	2.50762	2.219	2.796	TRUE	509.1	64.1879	vacant_housing_SES_subset	YES	9
509.8	Dependence on respirator [Ventilator] or supplemental oxygen	9	respiratory	coral4	1196	84345	1.82e-41	2.88509	2.466	3.304	TRUE	509.8	40.7401	vacant_housing_SES_subset	YES	9
512	Other symptoms of respiratory system	9	respiratory	coral4	43227	43654	8.64e-93	1.6524	1.494	1.811	TRUE	512	92.0635	vacant_housing_SES_subset	YES	9
512.7	Shortness of breath	9	respiratory	coral4	21049	43654	3.51e-109	2.18161	1.989	2.374	TRUE	512.7	108.454	vacant_housing_SES_subset	YES	9
512.8	Cough	9	respiratory	coral4	21407	43654	3.38e-76	1.82795	1.634	2.022	TRUE	512.8	75.4705	vacant_housing_SES_subset	YES	9
512.9	Other dyspnea	9	respiratory	coral4	20098	43654	1.76e-76	1.82742	1.634	2.021	TRUE	512.9	75.7551	vacant_housing_SES_subset	YES	9
580	Nephritis; nephrosis; renal sclerosis	11	genitourinary	black	1834	75131	1.91e-08	1.21293	0.79	1.636	TRUE	580	7.71971	vacant_housing_SES_subset	YES	9
585	Renal failure	11	genitourinary	black	12013	75131	3.62e-110	2.17302	1.982	2.364	TRUE	585	109.442	vacant_housing_SES_subset	YES	9
585.1	Acute renal failure	11	genitourinary	black	6676	75131	1.1e-98	2.45063	2.223	2.678	TRUE	585.1	97.9592	vacant_housing_SES_subset	YES	9
585.3	Chronic renal failure [CKD]	11	genitourinary	black	7694	75131	2.48e-70	2.01901	1.796	2.242	TRUE	585.3	69.6059	vacant_housing_SES_subset	YES	9
585.31	Renal dialysis	11	genitourinary	black	587	75131	1.2e-16	2.6153	1.996	3.234	TRUE	585.31	15.9193	vacant_housing_SES_subset	YES	9
585.32	End stage renal disease	11	genitourinary	black	1463	75131	1.14e-31	2.44008	2.032	2.848	TRUE	585.32	30.9446	vacant_housing_SES_subset	YES	9
585.33	Chronic Kidney Disease, Stage III	11	genitourinary	black	4300	75131	8.19e-20	1.34738	1.058	1.637	TRUE	585.33	19.0865	vacant_housing_SES_subset	YES	9
585.34	Chronic Kidney Disease, Stage IV	11	genitourinary	black	1574	75131	2.04e-17	1.8206	1.4	2.241	TRUE	585.34	16.6896	vacant_housing_SES_subset	YES	9
585.4	Chronic kidney disease, Stage I or II	11	genitourinary	black	2315	75131	6.31e-14	1.4028	1.036	1.769	TRUE	585.4	13.2002	vacant_housing_SES_subset	YES	9
586	Other disorders of the kidney and ureters	11	genitourinary	black	8936	75131	2.12e-37	1.41601	1.199	1.633	TRUE	586	36.6741	vacant_housing_SES_subset	YES	9
586.2	Cyst of kidney, acquired	11	genitourinary	black	3132	75131	8.5e-31	1.81827	1.509	2.127	TRUE	586.2	30.0705	vacant_housing_SES_subset	YES	9
588	Disorders resulting from impaired renal function	11	genitourinary	black	1499	75131	1.9e-16	1.80199	1.373	2.231	TRUE	588	15.7216	vacant_housing_SES_subset	YES	9
588.2	Secondary hyperparathyroidism (of renal origin)	11	genitourinary	black	1264	75131	2.73e-20	2.09851	1.653	2.544	TRUE	588.2	19.5635	vacant_housing_SES_subset	YES	9
591	Urinary tract infection	11	genitourinary	black	14156	66903	7.1e-34	1.19185	0.999	1.384	TRUE	591	33.1489	vacant_housing_SES_subset	YES	9
596	Other disorders of bladder	11	genitourinary	black	4746	90423	7.75e-10	0.861102	0.587	1.136	TRUE	596	9.11082	vacant_housing_SES_subset	YES	9
216	Benign neoplasm of skin	2	neoplasms	darkcyan	15712	75434	1.51e-129	-1.73492	-1.875	-1.594	TRUE	216	128.82	deprivation_index_SES_subset	YES	9
228	Hemangioma and lymphangioma, any site	2	neoplasms	darkcyan	5642	91586	1.16e-31	-1.26451	-1.476	-1.053	TRUE	228	30.9374	deprivation_index_SES_subset	YES	9
228.1	Hemangioma of skin and subcutaneous tissue	2	neoplasms	darkcyan	4556	91586	3.38e-38	-1.55559	-1.792	-1.32	TRUE	228.1	37.4717	deprivation_index_SES_subset	YES	9
249	Secondary diabetes mellitus	3	endocrine/metabolic	brown	1649	61523	1.48e-53	2.86598	2.501	3.231	TRUE	249	52.8312	deprivation_index_SES_subset	YES	9
250	Diabetes mellitus	3	endocrine/metabolic	brown	21482	61523	2.26e-304	2.39663	2.271	2.523	TRUE	250	303.646	deprivation_index_SES_subset	YES	9
250.1	Type 1 diabetes	3	endocrine/metabolic	brown	2319	61523	4.43e-41	2.11634	1.807	2.425	TRUE	250.1	40.3533	deprivation_index_SES_subset	YES	9
250.2	Type 2 diabetes	3	endocrine/metabolic	brown	21182	61523	1e-300	2.45228	2.325	2.579	TRUE	250.2	300	deprivation_index_SES_subset	YES	9
250.22	Type 2 diabetes with renal manifestations	3	endocrine/metabolic	brown	4311	61523	9.91e-116	2.79755	2.558	3.037	TRUE	250.22	115.004	deprivation_index_SES_subset	YES	9
250.23	Type 2 diabetes with ophthalmic manifestations	3	endocrine/metabolic	brown	2223	61523	7.54e-104	3.48525	3.17	3.801	TRUE	250.23	103.122	deprivation_index_SES_subset	YES	9
250.24	Type 2 diabetes with neurological manifestations	3	endocrine/metabolic	brown	5783	61523	5.58e-125	2.58682	2.374	2.8	TRUE	250.24	124.254	deprivation_index_SES_subset	YES	9
250.25	Diabetes type 2 with peripheral circulatory disorders	3	endocrine/metabolic	brown	2123	61523	3.99e-52	2.4948	2.173	2.817	TRUE	250.25	51.3994	deprivation_index_SES_subset	YES	9
250.42	Other abnormal glucose	3	endocrine/metabolic	brown	12236	61523	3.9e-47	1.13176	0.978	1.286	TRUE	250.42	46.4095	deprivation_index_SES_subset	YES	9
250.6	Polyneuropathy in diabetes	3	endocrine/metabolic	brown	3592	61523	1.65e-67	2.32058	2.059	2.583	TRUE	250.6	66.7815	deprivation_index_SES_subset	YES	9
260	Protein-calorie malnutrition	3	endocrine/metabolic	brown	2156	64601	2.86e-20	1.48514	1.17	1.801	TRUE	260	19.5429	deprivation_index_SES_subset	YES	9
271	Disorders of carbohydrate transport and metabolism	3	endocrine/metabolic	brown	8110	90520	4.71e-86	1.66525	1.499	1.831	TRUE	271	85.3274	deprivation_index_SES_subset	YES	9
271.3	Intestinal disaccharidase deficiencies and disaccharide malabsorption	3	endocrine/metabolic	brown	7966	90520	9.17e-87	1.68498	1.518	1.852	TRUE	271.3	86.0375	deprivation_index_SES_subset	YES	9
275	Disorders of mineral metabolism	3	endocrine/metabolic	brown	7051	90703	2.61e-46	1.32061	1.139	1.502	TRUE	275	45.5842	deprivation_index_SES_subset	YES	9
275.3	Disorders of magnesium metabolism	3	endocrine/metabolic	brown	2500	90703	3.12e-75	2.64715	2.364	2.93	TRUE	275.3	74.5054	deprivation_index_SES_subset	YES	9
275.5	Disorders of calcium/phosphorus metabolism	3	endocrine/metabolic	brown	2312	90703	9.81e-17	1.28548	0.982	1.589	TRUE	275.5	16.0085	deprivation_index_SES_subset	YES	9
275.53	Disorders of phosphorus metabolism	3	endocrine/metabolic	brown	1023	90703	4.55e-16	1.84342	1.399	2.288	TRUE	275.53	15.3421	deprivation_index_SES_subset	YES	9
276	Disorders of fluid, electrolyte, and acid-base balance	3	endocrine/metabolic	brown	15251	76271	7.12e-101	1.48644	1.35	1.623	TRUE	276	100.148	deprivation_index_SES_subset	YES	9
276.1	Electrolyte imbalance	3	endocrine/metabolic	brown	12172	76271	1.84e-78	1.43027	1.281	1.58	TRUE	276.1	77.7362	deprivation_index_SES_subset	YES	9
276.12	Hyposmolality and/or hyponatremia	3	endocrine/metabolic	brown	3778	76271	2.44e-21	1.20018	0.952	1.448	TRUE	276.12	20.6123	deprivation_index_SES_subset	YES	9
276.13	Hyperpotassemia	3	endocrine/metabolic	brown	3268	76271	4.06e-30	1.5413	1.276	1.806	TRUE	276.13	29.3917	deprivation_index_SES_subset	YES	9
276.4	Acid-base balance disorder	3	endocrine/metabolic	brown	2471	76271	1.34e-93	3.01879	2.73	3.307	TRUE	276.4	92.8724	deprivation_index_SES_subset	YES	9
276.41	Acidosis	3	endocrine/metabolic	brown	2163	76271	2.07e-81	2.99143	2.685	3.298	TRUE	276.41	80.6848	deprivation_index_SES_subset	YES	9
276.5	Hypovolemia	3	endocrine/metabolic	brown	4530	76271	1.15e-64	1.9528	1.727	2.178	TRUE	276.5	63.9396	deprivation_index_SES_subset	YES	9
276.6	Fluid overload	3	endocrine/metabolic	brown	1143	76271	4.08e-23	2.16182	1.734	2.59	TRUE	276.6	22.3892	deprivation_index_SES_subset	YES	9
278	Overweight, obesity and other hyperalimentation	3	endocrine/metabolic	brown	31277	63543	3.76e-151	1.41907	1.313	1.525	TRUE	278	150.425	deprivation_index_SES_subset	YES	9
278.1	Obesity	3	endocrine/metabolic	brown	31010	63543	1.72e-152	1.42862	1.322	1.535	TRUE	278.1	151.764	deprivation_index_SES_subset	YES	9
278.11	Morbid obesity	3	endocrine/metabolic	brown	13494	63543	2.69e-90	1.4621	1.32	1.604	TRUE	278.11	89.571	deprivation_index_SES_subset	YES	9
401	Hypertension	8	circulatory system	red	49997	46678	1e-300	2.44365	2.328	2.559	TRUE	401	300	deprivation_index_SES_subset	YES	9
401.1	Essential hypertension	8	circulatory system	red	49444	46678	1e-300	2.44127	2.325	2.557	TRUE	401.1	300	deprivation_index_SES_subset	YES	9
401.2	Hypertensive heart and/or renal disease	8	circulatory system	red	8052	46678	2.5e-265	3.87051	3.653	4.089	TRUE	401.2	264.602	deprivation_index_SES_subset	YES	9
401.21	Hypertensive heart disease	8	circulatory system	red	3472	46678	7.08e-142	3.81825	3.523	4.113	TRUE	401.21	141.15	deprivation_index_SES_subset	YES	9
401.22	Hypertensive chronic kidney disease	8	circulatory system	red	4792	46678	1.29e-172	3.7311	3.47	3.992	TRUE	401.22	171.888	deprivation_index_SES_subset	YES	9
411	Ischemic Heart Disease	8	circulatory system	red	15760	79327	3.75e-54	1.13699	0.993	1.281	TRUE	411	53.4265	deprivation_index_SES_subset	YES	9
411.2	Myocardial infarction	8	circulatory system	red	4484	79327	3.04e-33	1.41852	1.187	1.65	TRUE	411.2	32.5173	deprivation_index_SES_subset	YES	9
411.4	Coronary atherosclerosis	8	circulatory system	red	12979	79327	4.84e-44	1.11416	0.957	1.271	TRUE	411.4	43.3148	deprivation_index_SES_subset	YES	9
414	Other forms of chronic heart disease	8	circulatory system	red	2264	79327	1.4e-23	1.6018	1.288	1.915	TRUE	414	22.8552	deprivation_index_SES_subset	YES	9
415	Pulmonary heart disease	8	circulatory system	red	3782	91269	7.94e-22	1.18276	0.941	1.424	TRUE	415	21.1002	deprivation_index_SES_subset	YES	9
415.2	Chronic pulmonary heart disease	8	circulatory system	red	1468	91269	4.23e-17	1.60098	1.228	1.974	TRUE	415.2	16.3732	deprivation_index_SES_subset	YES	9
416	Cardiomegaly	8	circulatory system	red	3344	91269	9.19e-43	1.77832	1.524	2.033	TRUE	416	42.0366	deprivation_index_SES_subset	YES	9
418	Nonspecific chest pain	8	circulatory system	red	28602	59440	4.05e-130	1.45988	1.342	1.578	TRUE	418	129.393	deprivation_index_SES_subset	YES	9
428	Congestive heart failure; nonhypertensive	8	circulatory system	red	7063	82566	1.1e-112	2.1636	1.976	2.352	TRUE	428	111.959	deprivation_index_SES_subset	YES	9
428.1	Congestive heart failure (CHF) NOS	8	circulatory system	red	4712	82566	1.48e-89	2.2746	2.052	2.497	TRUE	428.1	88.8284	deprivation_index_SES_subset	YES	9
428.3	Heart failure with reduced EF [Systolic or combined heart failure]	8	circulatory system	red	3329	82566	1.99e-62	2.20574	1.946	2.465	TRUE	428.3	61.7019	deprivation_index_SES_subset	YES	9
428.4	Heart failure with preserved EF [Diastolic heart failure]	8	circulatory system	red	3205	82566	2.95e-48	1.98776	1.721	2.255	TRUE	428.4	47.5308	deprivation_index_SES_subset	YES	9
433	Cerebrovascular disease	8	circulatory system	red	8721	89116	1.06e-43	1.20811	1.037	1.379	TRUE	433	42.9767	deprivation_index_SES_subset	YES	9
433.2	Occlusion of cerebral arteries	8	circulatory system	red	3253	89116	1.24e-35	1.64465	1.386	1.903	TRUE	433.2	34.905	deprivation_index_SES_subset	YES	9
433.21	Cerebral artery occlusion, with cerebral infarction	8	circulatory system	red	3119	89116	2.54e-34	1.64527	1.381	1.909	TRUE	433.21	33.5957	deprivation_index_SES_subset	YES	9
433.8	Late effects of cerebrovascular disease	8	circulatory system	red	1376	89116	9.81e-29	2.15925	1.779	2.54	TRUE	433.8	28.0083	deprivation_index_SES_subset	YES	9
443.7	Peripheral angiopathy in diseases classified elsewhere	8	circulatory system	red	1151	82869	6.73e-24	2.14992	1.732	2.568	TRUE	443.7	23.172	deprivation_index_SES_subset	YES	9
452	Other venous embolism and thrombosis	8	circulatory system	red	4264	66102	1.37e-22	1.20017	0.96	1.441	TRUE	452	21.8631	deprivation_index_SES_subset	YES	9
452.2	Deep vein thrombosis [DVT]	8	circulatory system	red	3320	66102	3.07e-22	1.32373	1.056	1.591	TRUE	452.2	21.5134	deprivation_index_SES_subset	YES	9
456	Chronic venous insufficiency [CVI]	8	circulatory system	red	3648	66102	1.54e-20	1.24602	0.983	1.509	TRUE	456	19.8121	deprivation_index_SES_subset	YES	9
496	Chronic airway obstruction	9	respiratory	coral4	8823	66544	1.05e-82	1.70504	1.532	1.879	TRUE	496	81.9799	deprivation_index_SES_subset	YES	9
496.2	Chronic bronchitis	9	respiratory	coral4	3116	66544	8.33e-38	1.74923	1.482	2.016	TRUE	496.2	37.0793	deprivation_index_SES_subset	YES	9
496.21	Obstructive chronic bronchitis	9	respiratory	coral4	2233	66544	5.72e-40	2.07693	1.769	2.385	TRUE	496.21	39.2429	deprivation_index_SES_subset	YES	9
509	Respiratory failure, insufficiency, arrest	9	respiratory	coral4	4020	84345	3.52e-62	1.98226	1.749	2.216	TRUE	509	61.454	deprivation_index_SES_subset	YES	9
509.1	Respiratory failure	9	respiratory	coral4	3221	84345	2.2e-65	2.22705	1.971	2.483	TRUE	509.1	64.6576	deprivation_index_SES_subset	YES	9
509.8	Dependence on respirator [Ventilator] or supplemental oxygen	9	respiratory	coral4	1196	84345	2.67e-34	2.4975	2.097	2.898	TRUE	509.8	33.5736	deprivation_index_SES_subset	YES	9
512	Other symptoms of respiratory system	9	respiratory	coral4	43227	43654	9.15e-118	1.36817	1.252	1.484	TRUE	512	117.038	deprivation_index_SES_subset	YES	9
512.7	Shortness of breath	9	respiratory	coral4	21049	43654	4.01e-144	1.90486	1.759	2.051	TRUE	512.7	143.397	deprivation_index_SES_subset	YES	9
512.8	Cough	9	respiratory	coral4	21407	43654	7.22e-77	1.39616	1.249	1.544	TRUE	512.8	76.1415	deprivation_index_SES_subset	YES	9
512.9	Other dyspnea	9	respiratory	coral4	20098	43654	1.93e-73	1.38113	1.232	1.53	TRUE	512.9	72.7144	deprivation_index_SES_subset	YES	9
580	Nephritis; nephrosis; renal sclerosis	11	genitourinary	black	1834	75131	8.02e-39	2.2405	1.904	2.577	TRUE	580	38.0956	deprivation_index_SES_subset	YES	9
585	Renal failure	11	genitourinary	black	12013	75131	1.47e-184	2.28168	2.127	2.436	TRUE	585	183.833	deprivation_index_SES_subset	YES	9
585.1	Acute renal failure	11	genitourinary	black	6676	75131	1.74e-138	2.47377	2.28	2.667	TRUE	585.1	137.759	deprivation_index_SES_subset	YES	9
585.3	Chronic renal failure [CKD]	11	genitourinary	black	7694	75131	2.06e-140	2.39854	2.212	2.585	TRUE	585.3	139.686	deprivation_index_SES_subset	YES	9
585.31	Renal dialysis	11	genitourinary	black	587	75131	1.19e-23	2.9116	2.342	3.481	TRUE	585.31	22.9239	deprivation_index_SES_subset	YES	9
585.32	End stage renal disease	11	genitourinary	black	1463	75131	1.6e-69	3.29864	2.932	3.665	TRUE	585.32	68.7965	deprivation_index_SES_subset	YES	9
585.33	Chronic Kidney Disease, Stage III	11	genitourinary	black	4300	75131	4.63e-45	1.75486	1.511	1.999	TRUE	585.33	44.3348	deprivation_index_SES_subset	YES	9
585.34	Chronic Kidney Disease, Stage IV	11	genitourinary	black	1574	75131	1.69e-34	2.30409	1.935	2.673	TRUE	585.34	33.7719	deprivation_index_SES_subset	YES	9
585.4	Chronic kidney disease, Stage I or II	11	genitourinary	black	2315	75131	1.83e-23	1.5869	1.275	1.898	TRUE	585.4	22.7372	deprivation_index_SES_subset	YES	9
586	Other disorders of the kidney and ureters	11	genitourinary	black	8936	75131	2.46e-48	1.31072	1.135	1.487	TRUE	586	47.6099	deprivation_index_SES_subset	YES	9
586.2	Cyst of kidney, acquired	11	genitourinary	black	3132	75131	1.47e-33	1.66481	1.395	1.935	TRUE	586.2	32.8322	deprivation_index_SES_subset	YES	9
588	Disorders resulting from impaired renal function	11	genitourinary	black	1499	75131	3.11e-53	2.87561	2.509	3.243	TRUE	588	52.507	deprivation_index_SES_subset	YES	9
588.2	Secondary hyperparathyroidism (of renal origin)	11	genitourinary	black	1264	75131	8.39e-53	3.07497	2.681	3.469	TRUE	588.2	52.0762	deprivation_index_SES_subset	YES	9
591	Urinary tract infection	11	genitourinary	black	14156	66903	2.04e-46	1.0756	0.928	1.223	TRUE	591	45.69	deprivation_index_SES_subset	YES	9
596	Other disorders of bladder	11	genitourinary	black	4746	90423	9.78e-12	0.762486	0.543	0.982	TRUE	596	11.0095	deprivation_index_SES_subset	YES	9
155.1	Malignant neoplasm of liver, primary	2	neoplasms	darkcyan	226	93502	4.41e-10	3.00424	3.948	2.06	TRUE	155.1	9.35593	income_SES_subset	YES	8
172	Skin cancer	2	neoplasms	darkcyan	7087	84967	4.21e-279	-2.23362	-2.111	-2.356	TRUE	172	278.375	income_SES_subset	YES	8
172.1	Melanomas of skin, dx or hx	2	neoplasms	darkcyan	1555	84967	3.79e-96	-2.40684	-2.18	-2.634	TRUE	172.1	95.421	income_SES_subset	YES	8
172.11	Melanomas of skin	2	neoplasms	darkcyan	1555	84967	3.79e-96	-2.40684	-2.18	-2.634	TRUE	172.11	95.421	income_SES_subset	YES	8
172.3	Carcinoma in situ of skin	2	neoplasms	darkcyan	878	84967	9.17e-47	-2.26993	-1.96	-2.58	TRUE	172.3	46.0374	income_SES_subset	YES	8
195.1	Malignant neoplasm, other	2	neoplasms	darkcyan	1560	88956	3.76e-11	-0.837466	-0.589	-1.086	TRUE	195.1	10.4246	income_SES_subset	YES	8
244.2	Acquired hypothyroidism	3	endocrine/metabolic	brown	3549	74431	5.68e-25	-0.899084	-0.728	-1.07	TRUE	244.2	24.2454	income_SES_subset	YES	8
250.4	Abnormal glucose	3	endocrine/metabolic	brown	17672	61523	3.5e-38	0.628983	0.724	0.534	TRUE	250.4	37.4559	income_SES_subset	YES	8
250.7	Diabetic retinopathy	3	endocrine/metabolic	brown	1625	100414	2.06e-65	3.19162	3.558	2.825	TRUE	250.7	64.6851	income_SES_subset	YES	8
276.14	Hypopotassemia	3	endocrine/metabolic	brown	6268	76271	8.54e-229	3.08173	3.269	2.895	TRUE	276.14	228.068	income_SES_subset	YES	8
401.3	Other hypertensive complications	8	circulatory system	red	2013	46678	1.63e-74	2.89782	3.209	2.587	TRUE	401.3	73.7888	income_SES_subset	YES	8
418.1	Precordial pain	8	circulatory system	red	2043	59440	1.63e-41	2.0305	2.325	1.736	TRUE	418.1	40.7875	income_SES_subset	YES	8
428.2	Heart failure NOS	8	circulatory system	red	872	82566	2.38e-26	2.52492	2.991	2.059	TRUE	428.2	25.6242	income_SES_subset	YES	8
433.1	Occlusion and stenosis of precerebral arteries	8	circulatory system	red	3035	89116	2.89e-26	1.17167	1.388	0.955	TRUE	433.1	25.5389	income_SES_subset	YES	8
433.12	Cerebral atherosclerosis	8	circulatory system	red	240	89116	7.52e-15	3.92113	4.91	2.933	TRUE	433.12	14.1237	income_SES_subset	YES	8
440.2	Atherosclerosis of the extremities	8	circulatory system	red	1134	82869	1.17e-59	3.89976	4.369	3.431	TRUE	440.2	58.9323	income_SES_subset	YES	8
443.9	Peripheral vascular disease, unspecified	8	circulatory system	red	3460	82869	1.19e-117	2.91436	3.162	2.667	TRUE	443.9	116.923	income_SES_subset	YES	8
464	Acute sinusitis	9	respiratory	coral4	10321	52528	9.36e-12	-0.422356	-0.301	-0.544	TRUE	464	11.0287	income_SES_subset	YES	8
480	Pneumonia	9	respiratory	coral4	7816	74973	5.86e-116	1.74604	1.896	1.597	TRUE	480	115.232	income_SES_subset	YES	8
481	Influenza	9	respiratory	coral4	1513	74973	5.56e-33	2.10974	2.455	1.764	TRUE	481	32.2545	income_SES_subset	YES	8
495	Asthma	9	respiratory	coral4	18486	66544	5.21e-168	1.39955	1.499	1.3	TRUE	495	167.283	income_SES_subset	YES	8
496.1	Emphysema	9	respiratory	coral4	2553	66544	1.29e-175	4.77559	5.107	4.444	TRUE	496.1	174.888	income_SES_subset	YES	8
512.2	Painful respiration	9	respiratory	coral4	3162	43654	5.76e-51	1.94167	2.195	1.688	TRUE	512.2	50.2394	income_SES_subset	YES	8
580.3	Nephritis and nephropathy without mention of glomerulonephritis	11	genitourinary	black	1010	75131	4.68e-28	2.45375	2.892	2.016	TRUE	580.3	27.3295	income_SES_subset	YES	8
580.31	Nephritis and nephropathy in diseases classified elsewhere	11	genitourinary	black	590	75131	2.72e-27	3.47027	4.099	2.842	TRUE	580.31	26.5648	income_SES_subset	YES	8
587	Kidney replaced by transpant	11	genitourinary	black	787	75131	4.28e-22	2.41391	2.903	1.924	TRUE	587	21.3688	income_SES_subset	YES	8
598.4	Other cells and casts in urine	11	genitourinary	black	354	97874	2.94e-13	-1.7427	-1.275	-2.211	TRUE	598.4	12.532	income_SES_subset	YES	8
614	Inflammatory diseases of female pelvic organs	11	genitourinary	black	8274	45052	2.1e-101	1.77268	1.935	1.61	TRUE	614	100.678	income_SES_subset	YES	8
614.5	Inflammatory disease of cervix, vagina, and vulva	11	genitourinary	black	7420	45052	1.97e-94	1.80156	1.973	1.63	TRUE	614.5	93.7055	income_SES_subset	YES	8
614.52	Vaginitis and vulvovaginitis	11	genitourinary	black	6227	45052	7.14e-95	1.99951	2.189	1.81	TRUE	614.52	94.1463	income_SES_subset	YES	8
626.4	Premenstrual tension syndromes	11	genitourinary	black	315	27011	1.76e-12	-2.00327	-1.447	-2.56	TRUE	626.4	11.7542	income_SES_subset	YES	8
626.8	Infertility, female	11	genitourinary	black	1650	27011	3.56e-86	-2.68535	-2.418	-2.953	TRUE	626.8	85.4485	income_SES_subset	YES	8
627	Menopausal and postmenopausal disorders	11	genitourinary	black	13399	27011	1.79e-104	-1.38318	-1.258	-1.508	TRUE	627	103.748	income_SES_subset	YES	8
627.2	Symptomatic menopause	11	genitourinary	black	6064	27011	2.95e-108	-1.81312	-1.652	-1.974	TRUE	627.2	107.53	income_SES_subset	YES	8
627.5	Premature menopause and other ovarian failure	11	genitourinary	black	1913	27011	4.01e-26	-1.27925	-1.042	-1.516	TRUE	627.5	25.3964	income_SES_subset	YES	8
796	Elevated prostate specific antigen [PSA]	11	genitourinary	black	4165	21609	9.89e-22	-0.923357	-0.734	-1.112	TRUE	796	21.0049	income_SES_subset	YES	8
155.1	Malignant neoplasm of liver, primary	2	neoplasms	darkcyan	226	93502	8.66e-07	5.39205	7.54	3.244	TRUE	155.1	6.0624	education_SES_subset	YES	8
172	Skin cancer	2	neoplasms	darkcyan	7087	84967	1.5e-194	-3.83778	-3.585	-4.091	TRUE	172	193.824	education_SES_subset	YES	8
172.1	Melanomas of skin, dx or hx	2	neoplasms	darkcyan	1555	84967	4.48e-61	-3.75301	-3.307	-4.199	TRUE	172.1	60.3484	education_SES_subset	YES	8
172.11	Melanomas of skin	2	neoplasms	darkcyan	1555	84967	4.48e-61	-3.75301	-3.307	-4.199	TRUE	172.11	60.3484	education_SES_subset	YES	8
172.3	Carcinoma in situ of skin	2	neoplasms	darkcyan	878	84967	9.58e-28	-3.49851	-2.87	-4.127	TRUE	172.3	27.0187	education_SES_subset	YES	8
195.1	Malignant neoplasm, other	2	neoplasms	darkcyan	1560	88956	1.72e-10	-1.67152	-1.158	-2.185	TRUE	195.1	9.76462	education_SES_subset	YES	8
244.2	Acquired hypothyroidism	3	endocrine/metabolic	brown	3549	74431	2.17e-17	-1.5659	-1.204	-1.928	TRUE	244.2	16.6635	education_SES_subset	YES	8
250.4	Abnormal glucose	3	endocrine/metabolic	brown	17672	61523	6.44e-13	0.771595	0.982	0.561	TRUE	250.4	12.1911	education_SES_subset	YES	8
250.7	Diabetic retinopathy	3	endocrine/metabolic	brown	1625	100414	5.53e-50	6.65335	7.531	5.776	TRUE	250.7	49.2576	education_SES_subset	YES	8
276.14	Hypopotassemia	3	endocrine/metabolic	brown	6268	76271	1.91e-150	5.7954	6.23	5.361	TRUE	276.14	149.719	education_SES_subset	YES	8
401.3	Other hypertensive complications	8	circulatory system	red	2013	46678	9.47e-50	5.60381	6.344	4.863	TRUE	401.3	49.0239	education_SES_subset	YES	8
418.1	Precordial pain	8	circulatory system	red	2043	59440	6.38e-27	3.75319	4.438	3.068	TRUE	418.1	26.195	education_SES_subset	YES	8
428.2	Heart failure NOS	8	circulatory system	red	872	82566	6.02e-17	4.5638	5.633	3.494	TRUE	428.2	16.2201	education_SES_subset	YES	8
433.1	Occlusion and stenosis of precerebral arteries	8	circulatory system	red	3035	89116	2.36e-21	2.41714	2.916	1.918	TRUE	433.1	20.6277	education_SES_subset	YES	8
433.12	Cerebral atherosclerosis	8	circulatory system	red	240	89116	2.21e-09	6.56733	8.719	4.415	TRUE	433.12	8.65505	education_SES_subset	YES	8
440.2	Atherosclerosis of the extremities	8	circulatory system	red	1134	82869	2.77e-49	8.45195	9.574	7.329	TRUE	440.2	48.5576	education_SES_subset	YES	8
443.9	Peripheral vascular disease, unspecified	8	circulatory system	red	3460	82869	1.14e-82	5.62805	6.201	5.055	TRUE	443.9	81.9439	education_SES_subset	YES	8
464	Acute sinusitis	9	respiratory	coral4	10321	52528	3.03e-16	-1.08949	-0.828	-1.351	TRUE	464	15.518	education_SES_subset	YES	8
480	Pneumonia	9	respiratory	coral4	7816	74973	1.1e-99	3.92857	4.292	3.565	TRUE	480	98.9603	education_SES_subset	YES	8
481	Influenza	9	respiratory	coral4	1513	74973	7.58e-27	4.62933	5.475	3.784	TRUE	481	26.1201	education_SES_subset	YES	8
495	Asthma	9	respiratory	coral4	18486	66544	2.06e-115	2.66017	2.889	2.432	TRUE	495	114.687	education_SES_subset	YES	8
496.1	Emphysema	9	respiratory	coral4	2553	66544	7.26e-125	9.114	9.866	8.362	TRUE	496.1	124.139	education_SES_subset	YES	8
512.2	Painful respiration	9	respiratory	coral4	3162	43654	4.2e-34	3.71418	4.312	3.116	TRUE	512.2	33.3769	education_SES_subset	YES	8
580.3	Nephritis and nephropathy without mention of glomerulonephritis	11	genitourinary	black	1010	75131	3.37e-20	4.91138	5.957	3.866	TRUE	580.3	19.4721	education_SES_subset	YES	8
580.31	Nephritis and nephropathy in diseases classified elsewhere	11	genitourinary	black	590	75131	2.55e-19	6.81225	8.298	5.327	TRUE	580.31	18.594	education_SES_subset	YES	8
587	Kidney replaced by transpant	11	genitourinary	black	787	75131	1.18e-20	5.8653	7.099	4.632	TRUE	587	19.9264	education_SES_subset	YES	8
598.4	Other cells and casts in urine	11	genitourinary	black	354	97874	1.34e-23	-4.09203	-3.291	-4.893	TRUE	598.4	22.8742	education_SES_subset	YES	8
[truncated: 4,797 more rows]
